# Supplementary material for: Urinary complement proteins in IgA nephropathy progression from a relative quantitative proteomic analysis
Source: PeerJ. 2023 Apr 11;11:e15125. doi: 10.7717/peerj.15125 (PMC10103701; doi:10.7717/peerj.15125)
Supplement: Supplemental Information 1 [file peerj-11-15125-s001.xls]

## Sheet: Commonly identified proteins
Table S1. Identification and quantitation details of the urine proteomics
Accession	Description	Abundances : 114 (IgAN-1)	Abundances: 115 (IgAN-2)	Abundances: 116(IgAN-3)	Abundances: 117（MN）	IgAN-1	IgAN-2	IgAN-3	MN
A6NL88	Protein shisa-7 OS=Homo sapiens GN=SHISA7 PE=2 SV=3	101.25	143.15	71.55	84.05	1	1.41383	0.706667	0.830123
A8K2U0	Alpha-2-macroglobulin-like protein 1 OS=Homo sapiens GN=A2ML1 PE=1 SV=3	76.9	178.7	66.15	78.25	1	2.3238	0.860208	1.01756
B9A064	Immunoglobulin lambda-like polypeptide 5 OS=Homo sapiens GN=IGLL5 PE=2 SV=2	96	89.25	143.65	71.1	1	0.929688	1.49635	0.740625
O00115	Deoxyribonuclease-2-alpha OS=Homo sapiens GN=DNASE2 PE=1 SV=2	117.45	92.85	66.65	123.05	1	0.790549	0.567476	1.04768
O00187	Mannan-binding lectin serine protease 2 OS=Homo sapiens GN=MASP2 PE=1 SV=4	147.6	58.95	56.35	137.15	1	0.39939	0.381775	0.929201
O00241	Signal-regulatory protein beta-1 OS=Homo sapiens GN=SIRPB1 PE=1 SV=5	101.2	93.55	103.45	101.8	1	0.924407	1.02223	1.00593
O00244	Copper transport protein ATOX1 OS=Homo sapiens GN=ATOX1 PE=1 SV=1	137.8	61.25	67.45	133.5	1	0.444485	0.489478	0.968795
O00391	Sulfhydryl oxidase 1 OS=Homo sapiens GN=QSOX1 PE=1 SV=3	125.4	89.3	77.1	108.2	1	0.712121	0.614833	0.862839
O00468	Agrin OS=Homo sapiens GN=AGRN PE=1 SV=4	83.9	111.9	120.6	83.55	1	1.33373	1.43743	0.995828
O00533	Neural cell adhesion molecule L1-like protein OS=Homo sapiens GN=CHL1 PE=1 SV=4	152.7	65	77.2	105.1	1	0.425671	0.505566	0.688278
O00584	Ribonuclease T2 OS=Homo sapiens GN=RNASET2 PE=1 SV=2	78.2	118.6	94	109.25	1	1.51662	1.20205	1.39706
O00592	Podocalyxin OS=Homo sapiens GN=PODXL PE=1 SV=2	130.5	36.2	49.5	183.7	1	0.277395	0.37931	1.40766
O14594	Neurocan core protein OS=Homo sapiens GN=NCAN PE=2 SV=3	145.95	75.05	50.55	128.5	1	0.514217	0.346351	0.880439
O14773	Tripeptidyl-peptidase 1 OS=Homo sapiens GN=TPP1 PE=1 SV=2	91.15	99.2	104.15	105.55	1	1.08832	1.14262	1.15798
O14798	Tumor necrosis factor receptor superfamily member 10C OS=Homo sapiens GN=TNFRSF10C PE=1 SV=3	92.95	167.05	70.75	69.25	1	1.7972	0.761162	0.745024
O15197	Ephrin type-B receptor 6 OS=Homo sapiens GN=EPHB6 PE=1 SV=4	98.85	97.35	107.6	96.15	1	0.984825	1.08852	0.972686
O15230	Laminin subunit alpha-5 OS=Homo sapiens GN=LAMA5 PE=1 SV=8	69.95	152.15	95.6	82.35	1	2.17513	1.36669	1.17727
O15393	Transmembrane protease serine 2 OS=Homo sapiens GN=TMPRSS2 PE=1 SV=3	103.95	113	69.85	113.2	1	1.08706	0.671958	1.08899
O43278	Kunitz-type protease inhibitor 1 OS=Homo sapiens GN=SPINT1 PE=1 SV=2	102.75	104.25	106.15	86.8	1	1.0146	1.03309	0.844769
O43291	Kunitz-type protease inhibitor 2 OS=Homo sapiens GN=SPINT2 PE=1 SV=2	88.3	152.55	66.5	92.7	1	1.72763	0.753114	1.04983
O43451	Maltase-glucoamylase, intestinal OS=Homo sapiens GN=MGAM PE=1 SV=5	113	84.05	63.4	139.65	1	0.743805	0.561062	1.23584
O43493	Trans-Golgi network integral membrane protein 2 OS=Homo sapiens GN=TGOLN2 PE=1 SV=2	132.4	113.3	75.25	79.05	1	0.85574	0.568353	0.597054
O43567	E3 ubiquitin-protein ligase RNF13 OS=Homo sapiens GN=RNF13 PE=1 SV=1	97.4	108.9	83.75	109.95	1	1.11807	0.859856	1.12885
O43707	Alpha-actinin-4 OS=Homo sapiens GN=ACTN4 PE=1 SV=2	137.6	126.4	66.7	69.2	1	0.918605	0.484738	0.502907
O43852	Calumenin OS=Homo sapiens GN=CALU PE=1 SV=2	169.7	60.65	63.15	106.5	1	0.357395	0.372127	0.627578
O43866	CD5 antigen-like OS=Homo sapiens GN=CD5L PE=1 SV=1	87.35	123.55	122.25	66.9	1	1.41442	1.39954	0.765884
O60279	Sushi domain-containing protein 5 OS=Homo sapiens GN=SUSD5 PE=1 SV=3	78.8	116.55	115.2	89.5	1	1.47906	1.46193	1.13579
O60353	Frizzled-6 OS=Homo sapiens GN=FZD6 PE=1 SV=2	71.45	87.4	132.25	108.95	1	1.22323	1.85094	1.52484
O60437	Periplakin OS=Homo sapiens GN=PPL PE=1 SV=4	100.65	109.7	81.85	107.75	1	1.08992	0.813214	1.07054
O60494	Cubilin OS=Homo sapiens GN=CUBN PE=1 SV=5	121.5	89.4	85.4	103.7	1	0.735802	0.702881	0.853498
O60888	Protein CutA OS=Homo sapiens GN=CUTA PE=1 SV=2	121.8	94.05	83.15	101.05	1	0.772167	0.682677	0.829639
O75015	Low affinity immunoglobulin gamma Fc region receptor III-B OS=Homo sapiens GN=FCGR3B PE=1 SV=2	162.65	49.8	53.85	133.65	1	0.306179	0.331079	0.821703
O75144	ICOS ligand OS=Homo sapiens GN=ICOSLG PE=1 SV=2	144.2	64.7	75.35	115.8	1	0.448682	0.522538	0.803051
O75339	Cartilage intermediate layer protein 1 OS=Homo sapiens GN=CILP PE=1 SV=4	99.95	122.75	86.2	91.1	1	1.22811	0.862431	0.911456
O75347	Tubulin-specific chaperone A OS=Homo sapiens GN=TBCA PE=1 SV=3	194.65	51.3	54.25	99.85	1	0.26355	0.278705	0.512972
O75368	SH3 domain-binding glutamic acid-rich-like protein OS=Homo sapiens GN=SH3BGRL PE=1 SV=1	94.9	128.8	107.5	68.8	1	1.35722	1.13277	0.724974
O75369	Filamin-B OS=Homo sapiens GN=FLNB PE=1 SV=2	114.05	110.35	88.9	86.7	1	0.967558	0.779483	0.760193
O75487	Glypican-4 OS=Homo sapiens GN=GPC4 PE=1 SV=4	140.6	79.05	85.9	94.5	1	0.562233	0.610953	0.672119
O75503	Ceroid-lipofuscinosis neuronal protein 5 OS=Homo sapiens GN=CLN5 PE=1 SV=2	155	51.5	91.95	101.55	1	0.332258	0.593226	0.655161
O75594	Peptidoglycan recognition protein 1 OS=Homo sapiens GN=PGLYRP1 PE=1 SV=1	149.05	67.7	57.5	125.7	1	0.45421	0.385777	0.843341
O75882	Attractin OS=Homo sapiens GN=ATRN PE=1 SV=2	121.95	81.6	90.85	105.6	1	0.669127	0.744977	0.865929
O76076	WNT1-inducible-signaling pathway protein 2 OS=Homo sapiens GN=WISP2 PE=1 SV=1	85.15	108.2	120.7	86	1	1.2707	1.4175	1.00998
O94772	Lymphocyte antigen 6H OS=Homo sapiens GN=LY6H PE=2 SV=1	84.6	126.25	104.1	85	1	1.49232	1.2305	1.00473
O94910	Latrophilin-1 OS=Homo sapiens GN=LPHN1 PE=1 SV=1	89.6	117.85	96.1	96.4	1	1.31529	1.07254	1.07589
O94919	Endonuclease domain-containing 1 protein OS=Homo sapiens GN=ENDOD1 PE=1 SV=2	137.15	69.85	76.25	116.65	1	0.509296	0.555961	0.850529
O95274	Ly6/PLAUR domain-containing protein 3 OS=Homo sapiens GN=LYPD3 PE=1 SV=2	94.85	129.95	78.95	96.3	1	1.37006	0.832367	1.01529
O95336	6-phosphogluconolactonase OS=Homo sapiens GN=PGLS PE=1 SV=2	117.7	88.15	102.2	91.95	1	0.748938	0.868309	0.781223
O95460	Matrilin-4 OS=Homo sapiens GN=MATN4 PE=1 SV=3	91.75	154.15	74.85	79.25	1	1.68011	0.815804	0.86376
O95497	Pantetheinase OS=Homo sapiens GN=VNN1 PE=1 SV=2	95.65	81.9	86.2	136.3	1	0.856247	0.901202	1.42499
O95633	Follistatin-related protein 3 OS=Homo sapiens GN=FSTL3 PE=1 SV=1	82.55	110.15	129.65	77.6	1	1.33434	1.57056	0.940036
O95967	EGF-containing fibulin-like extracellular matrix protein 2 OS=Homo sapiens GN=EFEMP2 PE=1 SV=3	97.45	94.8	119.4	88.35	1	0.972807	1.22524	0.906619
O95980	Reversion-inducing cysteine-rich protein with Kazal motifs OS=Homo sapiens GN=RECK PE=1 SV=1	103.25	115.05	87.75	93.95	1	1.11429	0.849879	0.909927
O95998	Interleukin-18-binding protein OS=Homo sapiens GN=IL18BP PE=1 SV=2	163.95	61.05	62.8	112.2	1	0.37237	0.383044	0.684355
O96009	Napsin-A OS=Homo sapiens GN=NAPSA PE=1 SV=1	107.05	81.4	102.3	109.3	1	0.760392	0.955628	1.02102
P00441	Superoxide dismutase [Cu-Zn] OS=Homo sapiens GN=SOD1 PE=1 SV=2	85.4	135.5	85.5	93.6	1	1.58665	1.00117	1.09602
P00450	Ceruloplasmin OS=Homo sapiens GN=CP PE=1 SV=1	81.7	88.65	59.45	170.2	1	1.08507	0.727662	2.08323
P00533	Epidermal growth factor receptor OS=Homo sapiens GN=EGFR PE=1 SV=2	98.35	93.5	108.75	99.4	1	0.950686	1.10574	1.01068
P00734	Prothrombin OS=Homo sapiens GN=F2 PE=1 SV=2	98.05	96.05	108.8	97.2	1	0.979602	1.10964	0.991331
P00738	Haptoglobin OS=Homo sapiens GN=HP PE=1 SV=1	109.55	77	128	85.45	1	0.702875	1.16842	0.780009
P00740	Coagulation factor IX OS=Homo sapiens GN=F9 PE=1 SV=2	64.15	113.8	162.2	59.9	1	1.77397	2.52845	0.933749
P00746	Complement factor D OS=Homo sapiens GN=CFD PE=1 SV=5	101.75	81.05	107	110.2	1	0.79656	1.0516	1.08305
P00747	Plasminogen OS=Homo sapiens GN=PLG PE=1 SV=2	72.45	87.1	127.7	112.65	1	1.20221	1.76259	1.55487
P00749	Urokinase-type plasminogen activator OS=Homo sapiens GN=PLAU PE=1 SV=2	158.85	71	61.5	108.65	1	0.446963	0.387158	0.683979
P00751	Complement factor B OS=Homo sapiens GN=CFB PE=1 SV=2	62.85	92	182.25	62.9	1	1.4638	2.89976	1.0008
P00915	Carbonic anhydrase 1 OS=Homo sapiens GN=CA1 PE=1 SV=2	201.8	50	62.65	85.5	1	0.24777	0.310456	0.423687
P00918	Carbonic anhydrase 2 OS=Homo sapiens GN=CA2 PE=1 SV=2	199.7	61.55	76.15	62.65	1	0.308212	0.381322	0.313721
P00995	Pancreatic secretory trypsin inhibitor OS=Homo sapiens GN=SPINK1 PE=1 SV=2	106.05	116.15	106.5	71.3	1	1.09524	1.00424	0.672324
P01008	Antithrombin-III OS=Homo sapiens GN=SERPINC1 PE=1 SV=1	65.55	110.95	167.95	55.5	1	1.6926	2.56217	0.846682
P01009	Alpha-1-antitrypsin OS=Homo sapiens GN=SERPINA1 PE=1 SV=3	89.1	84.95	115.45	110.5	1	0.953423	1.29574	1.24018
P01011	Alpha-1-antichymotrypsin OS=Homo sapiens GN=SERPINA3 PE=1 SV=2	88.2	71.05	133.25	107.5	1	0.805556	1.51077	1.21882
P01023	Alpha-2-macroglobulin OS=Homo sapiens GN=A2M PE=1 SV=3	87.75	106.4	150.55	55.35	1	1.21254	1.71567	0.630769
P01024	Complement C3 OS=Homo sapiens GN=C3 PE=1 SV=2	64.1	102.95	171.4	61.5	1	1.60608	2.67395	0.959438
P01031	Complement C5 OS=Homo sapiens GN=C5 PE=1 SV=4	53.8	75.55	228.75	41.95	1	1.40428	4.25186	0.77974
P01033	Metalloproteinase inhibitor 1 OS=Homo sapiens GN=TIMP1 PE=1 SV=1	146.55	81.4	65.3	106.75	1	0.555442	0.445582	0.72842
P01034	Cystatin-C OS=Homo sapiens GN=CST3 PE=1 SV=1	142.1	74.4	81.45	102.05	1	0.523575	0.573188	0.718156
P01040	Cystatin-A OS=Homo sapiens GN=CSTA PE=1 SV=1	79.55	126.85	118.5	75.1	1	1.59459	1.48963	0.94406
P01042	Kininogen-1 OS=Homo sapiens GN=KNG1 PE=1 SV=2	176.4	67.9	58.75	96.95	1	0.384921	0.33305	0.549603
P01130	Low-density lipoprotein receptor OS=Homo sapiens GN=LDLR PE=1 SV=1	100.8	105.2	80.1	113.9	1	1.04365	0.794643	1.12996
P01133	Pro-epidermal growth factor OS=Homo sapiens GN=EGF PE=1 SV=2	138.25	94.05	64.9	102.75	1	0.680289	0.469439	0.743219
P01225	Follitropin subunit beta OS=Homo sapiens GN=FSHB PE=1 SV=2	83.65	144.2	72.95	99.2	1	1.72385	0.872086	1.18589
P01591	Immunoglobulin J chain OS=Homo sapiens GN=IGJ PE=1 SV=4	115.5	92.6	99.15	92.8	1	0.801732	0.858442	0.803463
P01598	Ig kappa chain V-I region EU OS=Homo sapiens PE=1 SV=1	94.35	105.2	130.35	70.05	1	1.115	1.38156	0.742448
P01613	Ig kappa chain V-I region Ni OS=Homo sapiens PE=1 SV=1	91.5	95	139.9	73.55	1	1.03825	1.52896	0.803825
P01616	Ig kappa chain V-II region MIL OS=Homo sapiens PE=1 SV=1	79.2	80.4	144.6	95.8	1	1.01515	1.82576	1.2096
P01617	Ig kappa chain V-II region TEW OS=Homo sapiens PE=1 SV=1	79.5	96	152.3	72.2	1	1.20755	1.91572	0.908176
P01717	Ig lambda chain V-IV region Hil OS=Homo sapiens PE=1 SV=1	90.5	112.2	134.55	62.8	1	1.23978	1.48674	0.693923
P01742	Ig heavy chain V-I region EU OS=Homo sapiens PE=1 SV=1	26.35	125.6	227.7	20.35	1	4.7666	8.64137	0.772296
P01781	Ig heavy chain V-III region GAL OS=Homo sapiens PE=1 SV=1	91.05	86.35	158.55	64	1	0.94838	1.74135	0.70291
P01833	Polymeric immunoglobulin receptor OS=Homo sapiens GN=PIGR PE=1 SV=4	115.1	76.8	93.7	114.4	1	0.667246	0.814075	0.993918
P01834	Ig kappa chain C region OS=Homo sapiens GN=IGKC PE=1 SV=1	100	82.2	116.1	101.65	1	0.822	1.161	1.0165
P01857	Ig gamma-1 chain C region OS=Homo sapiens GN=IGHG1 PE=1 SV=1	90.5	89.25	136.45	83.75	1	0.986188	1.50773	0.925414
P01859	Ig gamma-2 chain C region OS=Homo sapiens GN=IGHG2 PE=1 SV=2	105.9	92.3	118.95	82.9	1	0.871577	1.12323	0.782814
P01860	Ig gamma-3 chain C region OS=Homo sapiens GN=IGHG3 PE=1 SV=2	78.55	104.7	156.1	60.7	1	1.33291	1.98727	0.772756
P01861	Ig gamma-4 chain C region OS=Homo sapiens GN=IGHG4 PE=1 SV=1	77.05	88.75	158.75	75.5	1	1.15185	2.06035	0.979883
P01871	Ig mu chain C region OS=Homo sapiens GN=IGHM PE=1 SV=3	125.55	86.5	107.25	80.65	1	0.688969	0.854241	0.642374
P01876	Ig alpha-1 chain C region OS=Homo sapiens GN=IGHA1 PE=1 SV=2	84.2	109.1	152.35	54.35	1	1.29572	1.80938	0.645487
P01877	Ig alpha-2 chain C region OS=Homo sapiens GN=IGHA2 PE=1 SV=3	101.45	99.75	116.95	81.8	1	0.983243	1.15278	0.806309
P02042	Hemoglobin subunit delta OS=Homo sapiens GN=HBD PE=1 SV=2	197.65	53.7	78.3	70.35	1	0.271692	0.396155	0.355932
P02452	Collagen alpha-1(I) chain OS=Homo sapiens GN=COL1A1 PE=1 SV=5	73.45	123.75	117	85.85	1	1.68482	1.59292	1.16882
P02533	Keratin, type I cytoskeletal 14 OS=Homo sapiens GN=KRT14 PE=1 SV=4	72.65	103.8	159.3	64.25	1	1.42877	2.1927	0.884377
P02545	Prelamin-A/C OS=Homo sapiens GN=LMNA PE=1 SV=1	128.4	78.6	92.1	100.95	1	0.61215	0.71729	0.786215
P02647	Apolipoprotein A-I OS=Homo sapiens GN=APOA1 PE=1 SV=1	91.25	130.15	98.8	79.75	1	1.4263	1.08274	0.873973
P02649	Apolipoprotein E OS=Homo sapiens GN=APOE PE=1 SV=1	90.5	92.65	153.75	63.15	1	1.02376	1.6989	0.69779
P02671	Fibrinogen alpha chain OS=Homo sapiens GN=FGA PE=1 SV=2	84.95	70.8	186.55	57.7	1	0.833431	2.196	0.679223
P02675	Fibrinogen beta chain OS=Homo sapiens GN=FGB PE=1 SV=2	72.65	70.95	201.45	54.9	1	0.9766	2.77288	0.755678
P02679	Fibrinogen gamma chain OS=Homo sapiens GN=FGG PE=1 SV=3	61.8	66.75	221.3	50.1	1	1.0801	3.58091	0.81068
P02743	Serum amyloid P-component OS=Homo sapiens GN=APCS PE=1 SV=2	167.65	75.85	73.55	83	1	0.452431	0.438712	0.495079
P02748	Complement component C9 OS=Homo sapiens GN=C9 PE=1 SV=2	64.1	66.6	206.45	62.9	1	1.039	3.22075	0.981279
P02749	Beta-2-glycoprotein 1 OS=Homo sapiens GN=APOH PE=1 SV=3	80.7	79.4	166.1	73.8	1	0.983891	2.05824	0.914498
P02750	Leucine-rich alpha-2-glycoprotein OS=Homo sapiens GN=LRG1 PE=1 SV=2	115.15	64.05	68.55	152.3	1	0.556231	0.59531	1.32262
P02751	Fibronectin OS=Homo sapiens GN=FN1 PE=1 SV=4	67.95	152.55	99.6	79.95	1	2.24503	1.46578	1.1766
P02753	Retinol-binding protein 4 OS=Homo sapiens GN=RBP4 PE=1 SV=3	63.05	82.65	193	61.3	1	1.31086	3.06106	0.972244
P02760	Protein AMBP OS=Homo sapiens GN=AMBP PE=1 SV=1	65.95	104.9	141.45	87.7	1	1.5906	2.14481	1.3298
P02763	Alpha-1-acid glycoprotein 1 OS=Homo sapiens GN=ORM1 PE=1 SV=1	72.45	80.5	75.2	171.85	1	1.11111	1.03796	2.37198
P02765	Alpha-2-HS-glycoprotein OS=Homo sapiens GN=AHSG PE=1 SV=1	59.65	93.75	173.1	73.5	1	1.57167	2.90193	1.23219
P02768	Serum albumin OS=Homo sapiens GN=ALB PE=1 SV=2	91.3	97.2	131.4	80.1	1	1.06462	1.43921	0.877327
P02774	Vitamin D-binding protein OS=Homo sapiens GN=GC PE=1 SV=1	48.8	116.55	166.55	68.1	1	2.38832	3.41291	1.39549
P02775	Platelet basic protein OS=Homo sapiens GN=PPBP PE=1 SV=3	156.5	93.9	96.15	53.45	1	0.6	0.614377	0.341534
P02787	Serotransferrin OS=Homo sapiens GN=TF PE=1 SV=3	100.7	75.15	103.4	120.8	1	0.746276	1.02681	1.1996
P02788	Lactotransferrin OS=Homo sapiens GN=LTF PE=1 SV=6	83.65	195.65	47.65	73.1	1	2.33891	0.569635	0.873879
P02790	Hemopexin OS=Homo sapiens GN=HPX PE=1 SV=2	71.3	97.9	139.25	91.65	1	1.37307	1.95302	1.28541
P02792	Ferritin light chain OS=Homo sapiens GN=FTL PE=1 SV=2	62.1	68.75	126.65	142.5	1	1.10709	2.03945	2.29469
P02794	Ferritin heavy chain OS=Homo sapiens GN=FTH1 PE=1 SV=2	72.3	96.1	119.6	112	1	1.32918	1.65422	1.5491
P03952	Plasma kallikrein OS=Homo sapiens GN=KLKB1 PE=1 SV=1	76.15	113.45	145.8	64.65	1	1.48982	1.91464	0.848982
P03973	Antileukoproteinase OS=Homo sapiens GN=SLPI PE=1 SV=2	62.8	226.7	45.8	64.6	1	3.60987	0.729299	1.02866
P04003	C4b-binding protein alpha chain OS=Homo sapiens GN=C4BPA PE=1 SV=2	89.95	109.15	107.9	92.95	1	1.21345	1.19956	1.03335
P04004	Vitronectin OS=Homo sapiens GN=VTN PE=1 SV=1	81.6	78.25	163.85	76.35	1	0.958946	2.00797	0.935662
P04040	Catalase OS=Homo sapiens GN=CAT PE=1 SV=3	214.4	86.35	49.45	49.85	1	0.402752	0.230644	0.232509
P04066	Tissue alpha-L-fucosidase OS=Homo sapiens GN=FUCA1 PE=1 SV=4	87.35	76.5	77.05	159.1	1	0.875787	0.882084	1.82141
P04080	Cystatin-B OS=Homo sapiens GN=CSTB PE=1 SV=2	163.6	61.1	74.4	100.95	1	0.373472	0.454768	0.617054
P04083	Annexin A1 OS=Homo sapiens GN=ANXA1 PE=1 SV=2	168.95	80.2	82.3	68.55	1	0.474697	0.487126	0.405741
P04155	Trefoil factor 1 OS=Homo sapiens GN=TFF1 PE=1 SV=1	61.95	100.85	90.75	146.45	1	1.62793	1.46489	2.364
P04156	Major prion protein OS=Homo sapiens GN=PRNP PE=1 SV=1	121.05	100.5	89.7	88.8	1	0.830235	0.741016	0.733581
P04180	Phosphatidylcholine-sterol acyltransferase OS=Homo sapiens GN=LCAT PE=1 SV=1	117.8	68.8	80.5	132.9	1	0.584041	0.683362	1.12818
P04196	Histidine-rich glycoprotein OS=Homo sapiens GN=HRG PE=1 SV=1	77.35	72.45	171.15	79.05	1	0.936652	2.21267	1.02198
P04216	Thy-1 membrane glycoprotein OS=Homo sapiens GN=THY1 PE=1 SV=2	110.3	76.7	95.3	117.7	1	0.695376	0.864007	1.06709
P04217	Alpha-1B-glycoprotein OS=Homo sapiens GN=A1BG PE=1 SV=4	103.05	57.8	87.95	151.2	1	0.560893	0.853469	1.46725
P04264	Keratin, type II cytoskeletal 1 OS=Homo sapiens GN=KRT1 PE=1 SV=6	64.65	111.95	154.45	69	1	1.73163	2.38902	1.06729
P04275	von Willebrand factor OS=Homo sapiens GN=VWF PE=1 SV=4	96.3	99.5	119.8	84.4	1	1.03323	1.24403	0.876428
P04279	Semenogelin-1 OS=Homo sapiens GN=SEMG1 PE=1 SV=2	151.15	88	42.75	118.2	1	0.582203	0.282832	0.782005
P04745	Alpha-amylase 1 OS=Homo sapiens GN=AMY1A PE=1 SV=2	126.5	106.6	70.75	96.15	1	0.842688	0.559289	0.760079
P04746	Pancreatic alpha-amylase OS=Homo sapiens GN=AMY2A PE=1 SV=2	141.35	110.1	51.75	96.8	1	0.778918	0.366112	0.684825
P04792	Heat shock protein beta-1 OS=Homo sapiens GN=HSPB1 PE=1 SV=2	128.85	86.3	83.35	101.55	1	0.669771	0.646876	0.788126
P05060	Secretogranin-1 OS=Homo sapiens GN=CHGB PE=1 SV=2	136.7	96.95	60.5	105.8	1	0.709217	0.442575	0.773958
P05067	Amyloid beta A4 protein OS=Homo sapiens GN=APP PE=1 SV=3	101.9	110.45	84.25	103.4	1	1.08391	0.826791	1.01472
P05090	Apolipoprotein D OS=Homo sapiens GN=APOD PE=1 SV=1	80.7	108.2	99.65	111.4	1	1.34077	1.23482	1.38042
P05109	Protein S100-A8 OS=Homo sapiens GN=S100A8 PE=1 SV=1	68.7	228.8	48.1	54.35	1	3.33042	0.700146	0.791121
P05154	Plasma serine protease inhibitor OS=Homo sapiens GN=SERPINA5 PE=1 SV=3	116.35	112.75	71.1	99.85	1	0.969059	0.611087	0.858187
P05155	Plasma protease C1 inhibitor OS=Homo sapiens GN=SERPING1 PE=1 SV=2	154.7	68.5	80.4	96.35	1	0.442793	0.519716	0.622818
P05156	Complement factor I OS=Homo sapiens GN=CFI PE=1 SV=2	97.9	89	148.45	64.65	1	0.909091	1.51634	0.660368
P05160	Coagulation factor XIII B chain OS=Homo sapiens GN=F13B PE=1 SV=3	79.1	98.9	151.55	70.45	1	1.25032	1.91593	0.890645
P05164	Myeloperoxidase OS=Homo sapiens GN=MPO PE=1 SV=1	117.45	168.4	54.35	59.8	1	1.4338	0.46275	0.509153
P05362	Intercellular adhesion molecule 1 OS=Homo sapiens GN=ICAM1 PE=1 SV=2	133.1	72.55	75.35	119	1	0.545079	0.566116	0.894065
P05413	Fatty acid-binding protein, heart OS=Homo sapiens GN=FABP3 PE=1 SV=4	131.4	60.55	73.4	134.75	1	0.460807	0.5586	1.02549
P05451	Lithostathine-1-alpha OS=Homo sapiens GN=REG1A PE=1 SV=3	76.85	72.95	182.6	67.6	1	0.949252	2.37606	0.879636
P05452	Tetranectin OS=Homo sapiens GN=CLEC3B PE=1 SV=3	151.2	73	81.3	94.5	1	0.482804	0.537698	0.625
P05543	Thyroxine-binding globulin OS=Homo sapiens GN=SERPINA7 PE=1 SV=2	100.8	97.6	106.65	94.95	1	0.968254	1.05804	0.941964
P05546	Heparin cofactor 2 OS=Homo sapiens GN=SERPIND1 PE=1 SV=3	86.4	114.2	124.95	74.45	1	1.32176	1.44618	0.86169
P05556	Integrin beta-1 OS=Homo sapiens GN=ITGB1 PE=1 SV=2	84.75	129.75	79.45	106	1	1.53097	0.937463	1.25074
P05783	Keratin, type I cytoskeletal 18 OS=Homo sapiens GN=KRT18 PE=1 SV=2	109.35	108.2	98.55	83.95	1	0.989483	0.901235	0.767718
P05787	Keratin, type II cytoskeletal 8 OS=Homo sapiens GN=KRT8 PE=1 SV=7	100.85	104.05	92.4	102.7	1	1.03173	0.916212	1.01834
P05937	Calbindin OS=Homo sapiens GN=CALB1 PE=1 SV=2	126.5	79.2	60	134.25	1	0.626087	0.474308	1.06126
P05997	Collagen alpha-2(V) chain OS=Homo sapiens GN=COL5A2 PE=1 SV=3	115.9	113.5	100.35	70.15	1	0.979292	0.865833	0.605263
P06280	Alpha-galactosidase A OS=Homo sapiens GN=GLA PE=1 SV=1	132.05	93	68.05	106.8	1	0.704279	0.515335	0.808785
P06331	Ig heavy chain V-II region ARH-77 OS=Homo sapiens PE=4 SV=1	98.25	88.15	139.8	73.85	1	0.897201	1.4229	0.751654
P06396	Gelsolin OS=Homo sapiens GN=GSN PE=1 SV=1	175.7	54.9	60.35	109.1	1	0.312464	0.343483	0.620945
P06681	Complement C2 OS=Homo sapiens GN=C2 PE=1 SV=2	51.65	102.65	201.75	43.95	1	1.98742	3.9061	0.85092
P06702	Protein S100-A9 OS=Homo sapiens GN=S100A9 PE=1 SV=1	67.1	230.45	48.5	53.95	1	3.43443	0.722802	0.804024
P06727	Apolipoprotein A-IV OS=Homo sapiens GN=APOA4 PE=1 SV=3	109.5	91.85	108.8	89.85	1	0.838813	0.993607	0.820548
P06733	Alpha-enolase OS=Homo sapiens GN=ENO1 PE=1 SV=2	135.5	63.45	65.05	135.95	1	0.468266	0.480074	1.00332
P06734	Low affinity immunoglobulin epsilon Fc receptor OS=Homo sapiens GN=FCER2 PE=1 SV=1	99.85	100.55	101.25	98.3	1	1.00701	1.01402	0.984477
P06865	Beta-hexosaminidase subunit alpha OS=Homo sapiens GN=HEXA PE=1 SV=2	92.65	97.65	83	126.75	1	1.05397	0.895845	1.36805
P06870	Kallikrein-1 OS=Homo sapiens GN=KLK1 PE=1 SV=2	121.15	115.05	54.6	109.2	1	0.949649	0.450681	0.901362
P07108	Acyl-CoA-binding protein OS=Homo sapiens GN=DBI PE=1 SV=2	96.15	119.85	91.8	92.2	1	1.24649	0.954758	0.958918
P07148	Fatty acid-binding protein, liver OS=Homo sapiens GN=FABP1 PE=1 SV=1	122.6	73.8	71.2	132.4	1	0.601958	0.58075	1.07993
P07204	Thrombomodulin OS=Homo sapiens GN=THBD PE=1 SV=2	111.6	117.1	87.2	84.1	1	1.04928	0.781362	0.753584
P07225	Vitamin K-dependent protein S OS=Homo sapiens GN=PROS1 PE=1 SV=1	65.65	106.95	159.85	67.5	1	1.62909	2.43488	1.02818
P07237	Protein disulfide-isomerase OS=Homo sapiens GN=P4HB PE=1 SV=3	153.15	69.25	67.9	109.7	1	0.452171	0.443356	0.716291
P07288	Prostate-specific antigen OS=Homo sapiens GN=KLK3 PE=1 SV=2	103.05	69.55	63.85	163.55	1	0.674915	0.619602	1.58709
P07305	Histone H1.0 OS=Homo sapiens GN=H1F0 PE=1 SV=3	182.05	88.4	65.75	63.8	1	0.485581	0.361165	0.350453
P07306	Asialoglycoprotein receptor 1 OS=Homo sapiens GN=ASGR1 PE=1 SV=2	96.5	84.2	97.5	121.8	1	0.872539	1.01036	1.26218
P07307	Asialoglycoprotein receptor 2 OS=Homo sapiens GN=ASGR2 PE=1 SV=2	91.85	99.55	123	85.65	1	1.08383	1.33914	0.932499
P07333	Macrophage colony-stimulating factor 1 receptor OS=Homo sapiens GN=CSF1R PE=1 SV=2	104.5	76.45	96.55	122.55	1	0.731579	0.923923	1.17273
P07339	Cathepsin D OS=Homo sapiens GN=CTSD PE=1 SV=1	93.1	112.95	93.5	100.55	1	1.21321	1.0043	1.08002
P07355	Annexin A2 OS=Homo sapiens GN=ANXA2 PE=1 SV=2	150.2	85.1	84.5	80.25	1	0.566578	0.562583	0.534288
P07357	Complement component C8 alpha chain OS=Homo sapiens GN=C8A PE=1 SV=2	68.15	91.6	188.75	51.45	1	1.34409	2.76963	0.754952
P07358	Complement component C8 beta chain OS=Homo sapiens GN=C8B PE=1 SV=3	58.55	85.15	197.6	58.75	1	1.45431	3.37489	1.00342
P07360	Complement component C8 gamma chain OS=Homo sapiens GN=C8G PE=1 SV=3	71.85	91.4	174.85	61.9	1	1.27209	2.43354	0.861517
P07476	Involucrin OS=Homo sapiens GN=IVL PE=1 SV=2	93.25	86.3	89.45	131	1	0.925469	0.959249	1.40483
P07477	Trypsin-1 OS=Homo sapiens GN=PRSS1 PE=1 SV=1	76	123.85	127.4	72.8	1	1.62961	1.67632	0.957895
P07478	Trypsin-2 OS=Homo sapiens GN=PRSS2 PE=1 SV=1	69.5	110.7	154.3	65.5	1	1.59281	2.22014	0.942446
P07602	Proactivator polypeptide OS=Homo sapiens GN=PSAP PE=1 SV=2	80.3	122.2	78.95	118.6	1	1.52179	0.983188	1.47696
P07686	Beta-hexosaminidase subunit beta OS=Homo sapiens GN=HEXB PE=1 SV=3	97.35	98.95	87.95	115.8	1	1.01644	0.903441	1.18952
P07711	Cathepsin L1 OS=Homo sapiens GN=CTSL1 PE=1 SV=2	100.45	98.95	103.15	97.45	1	0.985067	1.02688	0.970134
P07858	Cathepsin B OS=Homo sapiens GN=CTSB PE=1 SV=3	85.15	137.85	92.95	84.05	1	1.61891	1.0916	0.987082
P07911	Uromodulin OS=Homo sapiens GN=UMOD PE=1 SV=1	140.35	93.35	69.8	96.4	1	0.665123	0.497328	0.686854
P07942	Laminin subunit beta-1 OS=Homo sapiens GN=LAMB1 PE=1 SV=2	87.1	136.2	86.3	90.35	1	1.56372	0.990815	1.03731
P07996	Thrombospondin-1 OS=Homo sapiens GN=THBS1 PE=1 SV=2	76.4	162.05	91.05	70.45	1	2.12107	1.19175	0.92212
P07998	Ribonuclease pancreatic OS=Homo sapiens GN=RNASE1 PE=1 SV=4	85.35	126.6	103.8	84.25	1	1.4833	1.21617	0.987112
P08123	Collagen alpha-2(I) chain OS=Homo sapiens GN=COL1A2 PE=1 SV=7	162	77.4	72.85	87.7	1	0.477778	0.449691	0.541358
P08138	Tumor necrosis factor receptor superfamily member 16 OS=Homo sapiens GN=NGFR PE=1 SV=1	83.45	147.4	72.3	96.9	1	1.76633	0.866387	1.16117
P08174	Complement decay-accelerating factor OS=Homo sapiens GN=CD55 PE=1 SV=4	85.45	102.6	111.85	100.05	1	1.2007	1.30895	1.17086
P08185	Corticosteroid-binding globulin OS=Homo sapiens GN=SERPINA6 PE=1 SV=1	109.8	58.95	105.95	125.3	1	0.536885	0.964936	1.14117
P08195	4F2 cell-surface antigen heavy chain OS=Homo sapiens GN=SLC3A2 PE=1 SV=3	122.95	89.2	94.45	93.35	1	0.725498	0.768198	0.759252
P08236	Beta-glucuronidase OS=Homo sapiens GN=GUSB PE=1 SV=2	131.5	88.75	60.9	118.85	1	0.674905	0.463118	0.903802
P08246	Neutrophil elastase OS=Homo sapiens GN=ELANE PE=1 SV=1	69.9	252	39.6	38.45	1	3.60515	0.566524	0.550072
P08294	Extracellular superoxide dismutase [Cu-Zn] OS=Homo sapiens GN=SOD3 PE=1 SV=2	136	87.9	69.8	106.25	1	0.646324	0.513235	0.78125
P08473	Neprilysin OS=Homo sapiens GN=MME PE=1 SV=2	104.95	70.35	104.3	120.4	1	0.670319	0.993807	1.14721
P08519	Apolipoprotein(a) OS=Homo sapiens GN=LPA PE=1 SV=1	107.1	124.35	83.6	84.95	1	1.16106	0.780579	0.793184
P08571	Monocyte differentiation antigen CD14 OS=Homo sapiens GN=CD14 PE=1 SV=2	166.7	49.05	62.25	122	1	0.294241	0.373425	0.731854
P08572	Collagen alpha-2(IV) chain OS=Homo sapiens GN=COL4A2 PE=1 SV=4	140.35	75.85	83.65	100.15	1	0.540435	0.59601	0.713573
P08582	Melanotransferrin OS=Homo sapiens GN=MFI2 PE=1 SV=2	129.75	89.6	74.2	106.45	1	0.690559	0.571869	0.820424
P08603	Complement factor H OS=Homo sapiens GN=CFH PE=1 SV=4	74.8	85.4	180.2	59.6	1	1.14171	2.40909	0.796791
P08637	Low affinity immunoglobulin gamma Fc region receptor III-A OS=Homo sapiens GN=FCGR3A PE=1 SV=2	194.2	39.15	42.35	124.3	1	0.201596	0.218074	0.640062
P08670	Vimentin OS=Homo sapiens GN=VIM PE=1 SV=4	167.85	99.7	64.35	68.15	1	0.593983	0.383378	0.406017
P08697	Alpha-2-antiplasmin OS=Homo sapiens GN=SERPINF2 PE=1 SV=3	93.75	78.65	112.65	114.95	1	0.838933	1.2016	1.22613
P08758	Annexin A5 OS=Homo sapiens GN=ANXA5 PE=1 SV=2	112	111	117.05	59.95	1	0.991071	1.04509	0.535268
P08779	Keratin, type I cytoskeletal 16 OS=Homo sapiens GN=KRT16 PE=1 SV=4	63.85	100.15	169.9	66.1	1	1.56852	2.66092	1.03524
P09211	Glutathione S-transferase P OS=Homo sapiens GN=GSTP1 PE=1 SV=2	142.4	85.75	82.45	89.4	1	0.602177	0.579003	0.627809
P09228	Cystatin-SA OS=Homo sapiens GN=CST2 PE=1 SV=1	76.9	96.5	93.3	133.25	1	1.25488	1.21326	1.73277
P09237	Matrilysin OS=Homo sapiens GN=MMP7 PE=1 SV=1	165.4	78.45	56.9	99.2	1	0.474305	0.344015	0.599758
P09382	Galectin-1 OS=Homo sapiens GN=LGALS1 PE=1 SV=2	139.85	69.65	81.4	109.15	1	0.498034	0.582052	0.780479
P09486	SPARC OS=Homo sapiens GN=SPARC PE=1 SV=1	111.95	106.15	86.4	95.5	1	0.948191	0.771773	0.853059
P09564	T-cell antigen CD7 OS=Homo sapiens GN=CD7 PE=1 SV=1	160.7	78.35	73.6	87.35	1	0.487554	0.457996	0.543559
P09603	Macrophage colony-stimulating factor 1 OS=Homo sapiens GN=CSF1 PE=1 SV=2	143.1	71.15	77.75	107.95	1	0.497205	0.543326	0.754368
P09619	Platelet-derived growth factor receptor beta OS=Homo sapiens GN=PDGFRB PE=1 SV=1	133.4	70.8	73.95	121.85	1	0.530735	0.554348	0.913418
P09668	Pro-cathepsin H OS=Homo sapiens GN=CTSH PE=1 SV=4	86.7	97.3	94.45	121.45	1	1.12226	1.08939	1.40081
P09871	Complement C1s subcomponent OS=Homo sapiens GN=C1S PE=1 SV=1	70.9	113.2	156.8	59.05	1	1.59661	2.21157	0.832863
P09923	Intestinal-type alkaline phosphatase OS=Homo sapiens GN=ALPI PE=1 SV=2	82.65	80.4	65.25	171.75	1	0.972777	0.789474	2.07804
P09936	Ubiquitin carboxyl-terminal hydrolase isozyme L1 OS=Homo sapiens GN=UCHL1 PE=1 SV=2	154.85	63.3	77.1	104.75	1	0.408783	0.497901	0.676461
P0C0L4	Complement C4-A OS=Homo sapiens GN=C4A PE=1 SV=1	58.7	76.25	220.65	44.45	1	1.29898	3.75894	0.75724
P0CG05	Ig lambda-2 chain C regions OS=Homo sapiens GN=IGLC2 PE=1 SV=1	86.45	91.9	148.65	73	1	1.06304	1.71949	0.844419
P0DJD8	Pepsin A-3 OS=Homo sapiens GN=PGA3 PE=1 SV=1	97.6	84.95	93.1	124.3	1	0.870389	0.953893	1.27357
P10153	Non-secretory ribonuclease OS=Homo sapiens GN=RNASE2 PE=1 SV=2	90.75	149.75	75.7	83.9	1	1.65014	0.83416	0.924518
P10253	Lysosomal alpha-glucosidase OS=Homo sapiens GN=GAA PE=1 SV=4	143.3	77.95	65.15	113.55	1	0.543964	0.454641	0.792394
P10451	Osteopontin OS=Homo sapiens GN=SPP1 PE=1 SV=1	200.25	49.25	65.4	85.1	1	0.245943	0.326592	0.424969
P10586	Receptor-type tyrosine-protein phosphatase F OS=Homo sapiens GN=PTPRF PE=1 SV=2	107.15	94.25	102.4	96.25	1	0.879608	0.95567	0.898273
P10599	Thioredoxin OS=Homo sapiens GN=TXN PE=1 SV=3	119	115.5	79.05	86.5	1	0.970588	0.664286	0.726891
P10619	Lysosomal protective protein OS=Homo sapiens GN=CTSA PE=1 SV=2	89.35	110.2	109.8	90.65	1	1.23335	1.22888	1.01455
P10643	Complement component C7 OS=Homo sapiens GN=C7 PE=1 SV=2	72.5	114.4	129.9	83.2	1	1.57793	1.79172	1.14759
P10645	Chromogranin-A OS=Homo sapiens GN=CHGA PE=1 SV=7	148.6	63.85	59.8	127.7	1	0.429677	0.402423	0.859354
P10646	Tissue factor pathway inhibitor OS=Homo sapiens GN=TFPI PE=1 SV=1	92.55	119.6	86.05	101.85	1	1.29227	0.929768	1.10049
P10909	Clusterin OS=Homo sapiens GN=CLU PE=1 SV=1	89.7	99.8	120.35	90.15	1	1.1126	1.34169	1.00502
P11021	78 kDa glucose-regulated protein OS=Homo sapiens GN=HSPA5 PE=1 SV=2	146.9	76.8	86.75	89.5	1	0.522805	0.590538	0.609258
P11047	Laminin subunit gamma-1 OS=Homo sapiens GN=LAMC1 PE=1 SV=3	92.85	138.45	75.9	92.75	1	1.49111	0.817447	0.998923
P11117	Lysosomal acid phosphatase OS=Homo sapiens GN=ACP2 PE=1 SV=3	112.1	59.05	65.05	163.8	1	0.526762	0.580285	1.4612
P11142	Heat shock cognate 71 kDa protein OS=Homo sapiens GN=HSPA8 PE=1 SV=1	129.2	93.85	77.65	99.35	1	0.726393	0.601006	0.768963
P11226	Mannose-binding protein C OS=Homo sapiens GN=MBL2 PE=1 SV=2	67.25	109.1	169.6	54.05	1	1.6223	2.52193	0.803717
P11279	Lysosome-associated membrane glycoprotein 1 OS=Homo sapiens GN=LAMP1 PE=1 SV=3	80.7	126.4	104.9	88.05	1	1.56629	1.29988	1.09108
P11362	Fibroblast growth factor receptor 1 OS=Homo sapiens GN=FGFR1 PE=1 SV=3	129.75	76.65	83.65	109.95	1	0.590751	0.644701	0.847399
P11684	Uteroglobin OS=Homo sapiens GN=SCGB1A1 PE=1 SV=1	56.45	92.95	178.75	71.9	1	1.64659	3.16652	1.27369
P11717	Cation-independent mannose-6-phosphate receptor OS=Homo sapiens GN=IGF2R PE=1 SV=3	89.55	107.6	122.3	80.55	1	1.20156	1.36572	0.899497
P12104	Fatty acid-binding protein, intestinal OS=Homo sapiens GN=FABP2 PE=1 SV=2	70.65	85	154.45	89.95	1	1.20311	2.18613	1.27318
P12109	Collagen alpha-1(VI) chain OS=Homo sapiens GN=COL6A1 PE=1 SV=3	190.05	56.9	63.25	89.8	1	0.299395	0.332807	0.472507
P12111	Collagen alpha-3(VI) chain OS=Homo sapiens GN=COL6A3 PE=1 SV=5	89.4	96.95	127.6	86.05	1	1.08445	1.42729	0.962528
P12259	Coagulation factor V OS=Homo sapiens GN=F5 PE=1 SV=4	115.25	74.65	62.7	147.45	1	0.647722	0.544035	1.27939
P12273	Prolactin-inducible protein OS=Homo sapiens GN=PIP PE=1 SV=1	64.85	70.9	35.35	228.95	1	1.09329	0.545104	3.53045
P12830	Cadherin-1 OS=Homo sapiens GN=CDH1 PE=1 SV=3	100.9	87.75	107.8	103.5	1	0.869673	1.06838	1.02577
P12955	Xaa-Pro dipeptidase OS=Homo sapiens GN=PEPD PE=1 SV=3	86.6	93.35	76.2	143.9	1	1.07794	0.879908	1.66166
P13284	Gamma-interferon-inducible lysosomal thiol reductase OS=Homo sapiens GN=IFI30 PE=1 SV=3	92.25	112.15	98.7	97	1	1.21572	1.06992	1.05149
P13473	Lysosome-associated membrane glycoprotein 2 OS=Homo sapiens GN=LAMP2 PE=1 SV=2	106.45	103.85	94.35	95.3	1	0.975575	0.886332	0.895256
P13591	Neural cell adhesion molecule 1 OS=Homo sapiens GN=NCAM1 PE=1 SV=3	103.1	105.05	107.3	84.6	1	1.01891	1.04074	0.820563
P13611	Versican core protein OS=Homo sapiens GN=VCAN PE=1 SV=3	153.7	66.05	79.45	100.8	1	0.429733	0.516916	0.655823
P13640	Metallothionein-1G OS=Homo sapiens GN=MT1G PE=1 SV=2	99.85	126.85	31.6	141.65	1	1.27041	0.316475	1.41863
P13645	Keratin, type I cytoskeletal 10 OS=Homo sapiens GN=KRT10 PE=1 SV=6	62.85	113.65	156.15	67.4	1	1.80827	2.48449	1.07239
P13646	Keratin, type I cytoskeletal 13 OS=Homo sapiens GN=KRT13 PE=1 SV=4	131.4	60.6	68.75	139.25	1	0.461187	0.523212	1.05974
P13647	Keratin, type II cytoskeletal 5 OS=Homo sapiens GN=KRT5 PE=1 SV=3	73.3	95.3	120.85	110.5	1	1.30014	1.6487	1.5075
P13671	Complement component C6 OS=Homo sapiens GN=C6 PE=1 SV=3	77.9	100.6	158.15	63.4	1	1.2914	2.03017	0.813864
P13688	Carcinoembryonic antigen-related cell adhesion molecule 1 OS=Homo sapiens GN=CEACAM1 PE=1 SV=2	88.2	120.55	89.35	101.9	1	1.36678	1.01304	1.15533
P13727	Bone marrow proteoglycan OS=Homo sapiens GN=PRG2 PE=1 SV=2	106.05	94.7	64.7	134.55	1	0.892975	0.61009	1.26874
P13987	CD59 glycoprotein OS=Homo sapiens GN=CD59 PE=1 SV=1	89.25	135.15	86	89.55	1	1.51429	0.963585	1.00336
P14151	L-selectin OS=Homo sapiens GN=SELL PE=1 SV=2	88.9	96.25	103.6	111.25	1	1.08268	1.16535	1.25141
P14207	Folate receptor beta OS=Homo sapiens GN=FOLR2 PE=1 SV=4	76.3	88.8	106.9	128.05	1	1.16383	1.40105	1.67824
P14314	Glucosidase 2 subunit beta OS=Homo sapiens GN=PRKCSH PE=1 SV=2	154.15	75.65	73.2	97.05	1	0.490756	0.474862	0.629582
P14384	Carboxypeptidase M OS=Homo sapiens GN=CPM PE=1 SV=2	152.45	60.1	53.65	133.8	1	0.394228	0.351919	0.877665
P14543	Nidogen-1 OS=Homo sapiens GN=NID1 PE=1 SV=3	147.05	75.85	80.5	96.6	1	0.515811	0.547433	0.656919
P14778	Interleukin-1 receptor type 1 OS=Homo sapiens GN=IL1R1 PE=1 SV=1	123.25	102.35	87.75	86.65	1	0.830426	0.711968	0.703043
P14780	Matrix metalloproteinase-9 OS=Homo sapiens GN=MMP9 PE=1 SV=3	80.35	208.65	61.55	49.5	1	2.59676	0.766024	0.616055
P15144	Aminopeptidase N OS=Homo sapiens GN=ANPEP PE=1 SV=4	107.4	86	113.15	93.5	1	0.800745	1.05354	0.870577
P15151	Poliovirus receptor OS=Homo sapiens GN=PVR PE=1 SV=2	188	47.95	58.75	105.3	1	0.255053	0.3125	0.560106
P15169	Carboxypeptidase N catalytic chain OS=Homo sapiens GN=CPN1 PE=1 SV=1	111.25	80.85	100.55	107.35	1	0.726742	0.90382	0.964944
P15289	Arylsulfatase A OS=Homo sapiens GN=ARSA PE=1 SV=3	116.2	76.45	62.6	144.7	1	0.657917	0.538726	1.24527
P15309	Prostatic acid phosphatase OS=Homo sapiens GN=ACPP PE=1 SV=3	86	84.9	107.45	121.65	1	0.987209	1.24942	1.41453
P15311	Ezrin OS=Homo sapiens GN=EZR PE=1 SV=4	133.9	91	74.65	100.4	1	0.679612	0.557506	0.749813
P15328	Folate receptor alpha OS=Homo sapiens GN=FOLR1 PE=1 SV=3	112	104.65	84.35	99	1	0.934375	0.753125	0.883929
P15529	Membrane cofactor protein OS=Homo sapiens GN=CD46 PE=1 SV=3	79.45	105.4	126.6	88.55	1	1.32662	1.59346	1.11454
P15586	N-acetylglucosamine-6-sulfatase OS=Homo sapiens GN=GNS PE=1 SV=3	109.35	81.35	47.2	162	1	0.743941	0.431642	1.48148
P15848	Arylsulfatase B OS=Homo sapiens GN=ARSB PE=1 SV=1	97.25	120.55	92	90.25	1	1.23959	0.946015	0.928021
P15924	Desmoplakin OS=Homo sapiens GN=DSP PE=1 SV=3	104.15	75.7	89.45	130.65	1	0.726836	0.858857	1.25444
P15941	Mucin-1 OS=Homo sapiens GN=MUC1 PE=1 SV=3	134.2	91.25	92.5	82.1	1	0.679955	0.68927	0.611773
P16035	Metalloproteinase inhibitor 2 OS=Homo sapiens GN=TIMP2 PE=1 SV=2	127.25	96.05	79.25	97.45	1	0.754813	0.62279	0.765815
P16070	CD44 antigen OS=Homo sapiens GN=CD44 PE=1 SV=3	145.55	101.65	64.1	88.7	1	0.698385	0.440398	0.609413
P16109	P-selectin OS=Homo sapiens GN=SELP PE=1 SV=3	88.15	124.15	89.45	98.25	1	1.40839	1.01475	1.11458
P16112	Aggrecan core protein OS=Homo sapiens GN=ACAN PE=1 SV=2	126.55	95.9	84.4	93.15	1	0.757803	0.66693	0.736073
P16278	Beta-galactosidase OS=Homo sapiens GN=GLB1 PE=1 SV=2	111	91.9	67.3	129.8	1	0.827928	0.606306	1.16937
P16284	Platelet endothelial cell adhesion molecule OS=Homo sapiens GN=PECAM1 PE=1 SV=1	114.85	93.75	75.45	115.95	1	0.816282	0.656944	1.00958
P16401	Histone H1.5 OS=Homo sapiens GN=HIST1H1B PE=1 SV=3	180.5	69.25	86.5	63.75	1	0.383657	0.479224	0.353186
P16444	Dipeptidase 1 OS=Homo sapiens GN=DPEP1 PE=1 SV=3	144.55	54	55.2	146.15	1	0.373573	0.381875	1.01107
P16870	Carboxypeptidase E OS=Homo sapiens GN=CPE PE=1 SV=1	109.65	77	61	152.35	1	0.702234	0.556316	1.38942
P17050	Alpha-N-acetylgalactosaminidase OS=Homo sapiens GN=NAGA PE=1 SV=2	113.75	75.1	68.7	142.45	1	0.66022	0.603956	1.25231
P17813	Endoglin OS=Homo sapiens GN=ENG PE=1 SV=2	138.15	71.25	86.1	104.45	1	0.515744	0.623236	0.756062
P17900	Ganglioside GM2 activator OS=Homo sapiens GN=GM2A PE=1 SV=4	64.3	95.95	124.65	115.1	1	1.49222	1.93857	1.79005
P17931	Galectin-3 OS=Homo sapiens GN=LGALS3 PE=1 SV=5	142.4	76.85	70.05	110.6	1	0.539677	0.491924	0.776685
P17936	Insulin-like growth factor-binding protein 3 OS=Homo sapiens GN=IGFBP3 PE=1 SV=2	100.7	99.55	121.1	78.65	1	0.98858	1.20258	0.781033
P18065	Insulin-like growth factor-binding protein 2 OS=Homo sapiens GN=IGFBP2 PE=1 SV=2	119.6	85	77.45	117.9	1	0.710702	0.647575	0.985786
P18206	Vinculin OS=Homo sapiens GN=VCL PE=1 SV=4	72.85	161.85	78.75	86.6	1	2.22169	1.08099	1.18874
P18510	Interleukin-1 receptor antagonist protein OS=Homo sapiens GN=IL1RN PE=1 SV=1	125.7	96.35	82.2	95.75	1	0.766508	0.653938	0.761734
P19013	Keratin, type II cytoskeletal 4 OS=Homo sapiens GN=KRT4 PE=1 SV=4	130.65	78.9	69	121.45	1	0.603904	0.528129	0.929583
P19021	Peptidyl-glycine alpha-amidating monooxygenase OS=Homo sapiens GN=PAM PE=1 SV=2	126.05	82.65	64.2	127.15	1	0.655692	0.509322	1.00873
P19022	Cadherin-2 OS=Homo sapiens GN=CDH2 PE=1 SV=4	132.5	101.35	71.1	95	1	0.764906	0.536604	0.716981
P19256	Lymphocyte function-associated antigen 3 OS=Homo sapiens GN=CD58 PE=1 SV=1	116.3	101.35	90.35	92.05	1	0.871453	0.77687	0.791488
P19320	Vascular cell adhesion protein 1 OS=Homo sapiens GN=VCAM1 PE=1 SV=1	66.6	76.95	163.6	92.9	1	1.15541	2.45646	1.39489
P19438	Tumor necrosis factor receptor superfamily member 1A OS=Homo sapiens GN=TNFRSF1A PE=1 SV=1	60.75	160.9	126.6	51.75	1	2.64856	2.08395	0.851852
P19440	Gamma-glutamyltranspeptidase 1 OS=Homo sapiens GN=GGT1 PE=1 SV=2	124.65	72.35	73.2	129.8	1	0.580425	0.587244	1.04132
P19652	Alpha-1-acid glycoprotein 2 OS=Homo sapiens GN=ORM2 PE=1 SV=2	62.95	90.55	66.5	180.05	1	1.43844	1.05639	2.86021
P19823	Inter-alpha-trypsin inhibitor heavy chain H2 OS=Homo sapiens GN=ITIH2 PE=1 SV=2	76.55	118.1	127.9	77.45	1	1.54278	1.6708	1.01176
P19827	Inter-alpha-trypsin inhibitor heavy chain H1 OS=Homo sapiens GN=ITIH1 PE=1 SV=3	81.9	106.3	137.05	74.75	1	1.29792	1.67338	0.912698
P19835	Bile salt-activated lipase OS=Homo sapiens GN=CEL PE=1 SV=3	132.2	82.7	49.25	135.9	1	0.625567	0.372542	1.02799
P20138	Myeloid cell surface antigen CD33 OS=Homo sapiens GN=CD33 PE=1 SV=2	132.4	90.2	78.55	98.9	1	0.681269	0.593278	0.746979
P20333	Tumor necrosis factor receptor superfamily member 1B OS=Homo sapiens GN=TNFRSF1B PE=1 SV=3	69.5	124.1	92.9	113.5	1	1.78561	1.33669	1.63309
P20810	Calpastatin OS=Homo sapiens GN=CAST PE=1 SV=4	161.8	80.5	83	74.7	1	0.497528	0.512979	0.461681
P20933	N(4)-(beta-N-acetylglucosaminyl)-L-asparaginase OS=Homo sapiens GN=AGA PE=1 SV=2	84.85	117.2	82.65	115.3	1	1.38126	0.974072	1.35887
P21333	Filamin-A OS=Homo sapiens GN=FLNA PE=1 SV=4	92.5	132.85	84.1	90.55	1	1.43622	0.909189	0.978919
P21709	Ephrin type-A receptor 1 OS=Homo sapiens GN=EPHA1 PE=1 SV=4	120.7	89	98.2	92.1	1	0.737365	0.813587	0.763049
P21802	Fibroblast growth factor receptor 2 OS=Homo sapiens GN=FGFR2 PE=1 SV=1	113.45	97.65	76.45	112.45	1	0.860732	0.673865	0.991186
P22105	Tenascin-X OS=Homo sapiens GN=TNXB PE=1 SV=3	100.75	116	90.05	93.2	1	1.15136	0.893797	0.925062
P22223	Cadherin-3 OS=Homo sapiens GN=CDH3 PE=1 SV=2	125.15	62.7	87.05	125.15	1	0.500999	0.695565	1
P22304	Iduronate 2-sulfatase OS=Homo sapiens GN=IDS PE=1 SV=1	109.9	98.15	72.6	119.35	1	0.893085	0.660601	1.08599
P22352	Glutathione peroxidase 3 OS=Homo sapiens GN=GPX3 PE=1 SV=2	109.45	100.65	76.05	113.9	1	0.919598	0.694838	1.04066
P22532	Small proline-rich protein 2D OS=Homo sapiens GN=SPRR2D PE=2 SV=2	57.55	107.05	58.25	177.1	1	1.86012	1.01216	3.07732
P22692	Insulin-like growth factor-binding protein 4 OS=Homo sapiens GN=IGFBP4 PE=1 SV=2	90.85	95.8	127.7	85.65	1	1.05449	1.40561	0.942763
P22748	Carbonic anhydrase 4 OS=Homo sapiens GN=CA4 PE=1 SV=2	121.15	102.6	80.45	95.75	1	0.846884	0.664053	0.790343
P22792	Carboxypeptidase N subunit 2 OS=Homo sapiens GN=CPN2 PE=1 SV=3	149	73	89.9	88.05	1	0.489933	0.603356	0.59094
P22891	Vitamin K-dependent protein Z OS=Homo sapiens GN=PROZ PE=1 SV=2	114.05	65.6	69.45	150.85	1	0.575186	0.608943	1.32267
P22897	Macrophage mannose receptor 1 OS=Homo sapiens GN=MRC1 PE=1 SV=1	75.3	70.55	172.45	81.65	1	0.936919	2.29017	1.08433
P23142	Fibulin-1 OS=Homo sapiens GN=FBLN1 PE=1 SV=4	68.1	139.1	112.35	80.5	1	2.04258	1.64978	1.18209
P23284	Peptidyl-prolyl cis-trans isomerase B OS=Homo sapiens GN=PPIB PE=1 SV=2	158.25	46.75	56.2	138.85	1	0.295419	0.355134	0.877409
P23470	Receptor-type tyrosine-protein phosphatase gamma OS=Homo sapiens GN=PTPRG PE=1 SV=4	114.95	89.45	96.75	98.85	1	0.778164	0.84167	0.859939
P23471	Receptor-type tyrosine-protein phosphatase zeta OS=Homo sapiens GN=PTPRZ1 PE=1 SV=4	140.5	93	80.2	86.25	1	0.661922	0.570819	0.613879
P23528	Cofilin-1 OS=Homo sapiens GN=CFL1 PE=1 SV=3	207.35	58.45	55.2	78.95	1	0.281891	0.266217	0.380757
P24592	Insulin-like growth factor-binding protein 6 OS=Homo sapiens GN=IGFBP6 PE=1 SV=1	84.8	100.1	128	87.1	1	1.18042	1.50943	1.02712
P24593	Insulin-like growth factor-binding protein 5 OS=Homo sapiens GN=IGFBP5 PE=1 SV=1	110.3	98	103.55	88.15	1	0.888486	0.938803	0.799184
P24821	Tenascin OS=Homo sapiens GN=TNC PE=1 SV=3	84.5	135.55	101.85	78.05	1	1.60414	1.20533	0.923669
P24855	Deoxyribonuclease-1 OS=Homo sapiens GN=DNASE1 PE=1 SV=1	111.35	51.4	45.15	192.1	1	0.461608	0.405478	1.72519
P25311	Zinc-alpha-2-glycoprotein OS=Homo sapiens GN=AZGP1 PE=1 SV=2	94.7	96.4	57.6	151.3	1	1.01795	0.608237	1.59768
P25774	Cathepsin S OS=Homo sapiens GN=CTSS PE=1 SV=3	99.05	116.85	95.55	88.5	1	1.17971	0.964664	0.893488
P25940	Collagen alpha-3(V) chain OS=Homo sapiens GN=COL5A3 PE=1 SV=3	187.65	57.35	61.85	93.15	1	0.305622	0.329603	0.496403
P25942	Tumor necrosis factor receptor superfamily member 5 OS=Homo sapiens GN=CD40 PE=1 SV=1	76.15	144.05	86.2	93.6	1	1.89166	1.13198	1.22915
P26038	Moesin OS=Homo sapiens GN=MSN PE=1 SV=3	132.4	99.35	75.8	92.45	1	0.750378	0.572508	0.698263
P26447	Protein S100-A4 OS=Homo sapiens GN=S100A4 PE=1 SV=1	162.8	123.85	55.7	57.65	1	0.760749	0.342138	0.354115
P26842	CD27 antigen OS=Homo sapiens GN=CD27 PE=1 SV=2	87.15	122.4	87.85	102.55	1	1.40448	1.00803	1.17671
P26927	Hepatocyte growth factor-like protein OS=Homo sapiens GN=MST1 PE=1 SV=2	103.25	95.4	104.3	97	1	0.923971	1.01017	0.939467
P26992	Ciliary neurotrophic factor receptor subunit alpha OS=Homo sapiens GN=CNTFR PE=1 SV=2	102.8	93.05	97.05	107.15	1	0.905156	0.944066	1.04232
P27482	Calmodulin-like protein 3 OS=Homo sapiens GN=CALML3 PE=1 SV=2	176.2	53.1	50.45	120.25	1	0.301362	0.286322	0.682463
P27487	Dipeptidyl peptidase 4 OS=Homo sapiens GN=DPP4 PE=1 SV=2	114.2	70.8	69.3	145.75	1	0.619965	0.60683	1.27627
P27797	Calreticulin OS=Homo sapiens GN=CALR PE=1 SV=1	152.55	48.8	79.8	118.85	1	0.319895	0.523107	0.779089
P27918	Properdin OS=Homo sapiens GN=CFP PE=1 SV=2	56.5	175.55	123.45	44.5	1	3.10708	2.18496	0.787611
P27930	Interleukin-1 receptor type 2 OS=Homo sapiens GN=IL1R2 PE=1 SV=1	117	72.55	90.75	119.65	1	0.620085	0.775641	1.02265
P28799	Granulins OS=Homo sapiens GN=GRN PE=1 SV=2	87.4	131.15	85.05	96.4	1	1.50057	0.973112	1.10297
P28827	Receptor-type tyrosine-protein phosphatase mu OS=Homo sapiens GN=PTPRM PE=1 SV=2	140.9	82.1	81.7	95.3	1	0.582683	0.579844	0.676366
P28908	Tumor necrosis factor receptor superfamily member 8 OS=Homo sapiens GN=TNFRSF8 PE=1 SV=1	91.75	120	88.2	100.05	1	1.3079	0.961308	1.09046
P29279	Connective tissue growth factor OS=Homo sapiens GN=CTGF PE=1 SV=2	73.95	119.75	124.15	82.15	1	1.61934	1.67884	1.11089
P29323	Ephrin type-B receptor 2 OS=Homo sapiens GN=EPHB2 PE=1 SV=5	107.65	97.75	92.2	102.35	1	0.908035	0.856479	0.950766
P29400	Collagen alpha-5(IV) chain OS=Homo sapiens GN=COL4A5 PE=1 SV=2	171.35	53.6	56.25	118.85	1	0.31281	0.328275	0.69361
P29508	Serpin B3 OS=Homo sapiens GN=SERPINB3 PE=1 SV=2	91	123.6	68.3	117.1	1	1.35824	0.750549	1.28681
P29622	Kallistatin OS=Homo sapiens GN=SERPINA4 PE=1 SV=3	111.3	84.05	108.65	96	1	0.755166	0.97619	0.862534
P29966	Myristoylated alanine-rich C-kinase substrate OS=Homo sapiens GN=MARCKS PE=1 SV=4	84.25	89.5	141.7	84.5	1	1.06231	1.6819	1.00297
P30041	Peroxiredoxin-6 OS=Homo sapiens GN=PRDX6 PE=1 SV=3	220.35	55.9	48.05	75.75	1	0.253687	0.218062	0.343771
P30043	Flavin reductase (NADPH) OS=Homo sapiens GN=BLVRB PE=1 SV=3	171.85	78.1	74.6	75.45	1	0.454466	0.4341	0.439046
P30044	Peroxiredoxin-5, mitochondrial OS=Homo sapiens GN=PRDX5 PE=1 SV=4	173.1	64.25	60.55	102.15	1	0.371173	0.349798	0.590121
P30047	GTP cyclohydrolase 1 feedback regulatory protein OS=Homo sapiens GN=GCHFR PE=1 SV=3	101.45	113.9	83.7	100.95	1	1.12272	0.825037	0.995071
P30086	Phosphatidylethanolamine-binding protein 1 OS=Homo sapiens GN=PEBP1 PE=1 SV=3	165.15	61.85	71.45	101.5	1	0.374508	0.432637	0.614593
P30101	Protein disulfide-isomerase A3 OS=Homo sapiens GN=PDIA3 PE=1 SV=4	150.5	67.2	69.85	112.45	1	0.446512	0.46412	0.747176
P30530	Tyrosine-protein kinase receptor UFO OS=Homo sapiens GN=AXL PE=1 SV=3	156.55	69.5	56.9	117.05	1	0.443948	0.363462	0.747684
P30740	Leukocyte elastase inhibitor OS=Homo sapiens GN=SERPINB1 PE=1 SV=1	70.65	170.75	95.6	63	1	2.41684	1.35315	0.89172
P31025	Lipocalin-1 OS=Homo sapiens GN=LCN1 PE=1 SV=1	83.6	97.7	101.55	117.15	1	1.16866	1.21471	1.40132
P31151	Protein S100-A7 OS=Homo sapiens GN=S100A7 PE=1 SV=4	135.05	83.1	63.75	118.1	1	0.615328	0.472047	0.874491
P31431	Syndecan-4 OS=Homo sapiens GN=SDC4 PE=1 SV=2	162.2	55.2	58.25	124.3	1	0.340321	0.359125	0.766338
P31944	Caspase-14 OS=Homo sapiens GN=CASP14 PE=1 SV=2	98.2	110.35	88.15	103.35	1	1.12373	0.897658	1.05244
P31948	Stress-induced-phosphoprotein 1 OS=Homo sapiens GN=STIP1 PE=1 SV=1	145.65	80.4	82.2	91.8	1	0.552008	0.564367	0.630278
P31949	Protein S100-A11 OS=Homo sapiens GN=S100A11 PE=1 SV=2	104.9	139.05	78.65	77.35	1	1.32555	0.749762	0.737369
P32004	Neural cell adhesion molecule L1 OS=Homo sapiens GN=L1CAM PE=1 SV=2	135.55	93.55	74.8	96.15	1	0.690151	0.551826	0.709332
P32119	Peroxiredoxin-2 OS=Homo sapiens GN=PRDX2 PE=1 SV=5	227.6	52.15	52.85	67.4	1	0.22913	0.232206	0.296134
P33151	Cadherin-5 OS=Homo sapiens GN=CDH5 PE=1 SV=5	110.4	76.4	108.8	104.35	1	0.692029	0.985507	0.945199
P34059	N-acetylgalactosamine-6-sulfatase OS=Homo sapiens GN=GALNS PE=1 SV=1	123.25	77.15	59.9	139.7	1	0.625963	0.486004	1.13347
P34096	Ribonuclease 4 OS=Homo sapiens GN=RNASE4 PE=1 SV=3	98.2	158.35	71.6	71.8	1	1.61253	0.729124	0.731161
P35052	Glypican-1 OS=Homo sapiens GN=GPC1 PE=1 SV=2	115.85	93.5	80.4	110.25	1	0.807078	0.694001	0.951662
P35321	Cornifin-A OS=Homo sapiens GN=SPRR1A PE=1 SV=2	87.7	72.85	80.95	158.55	1	0.830673	0.923033	1.80787
P35443	Thrombospondin-4 OS=Homo sapiens GN=THBS4 PE=1 SV=2	78.1	127.25	86.3	108.3	1	1.62932	1.10499	1.38668
P35527	Keratin, type I cytoskeletal 9 OS=Homo sapiens GN=KRT9 PE=1 SV=3	60.05	120.05	166	53.9	1	1.99917	2.76436	0.897585
P35555	Fibrillin-1 OS=Homo sapiens GN=FBN1 PE=1 SV=3	80.9	129.25	94.95	94.9	1	1.59765	1.17367	1.17305
P35579	Myosin-9 OS=Homo sapiens GN=MYH9 PE=1 SV=4	79.45	153.65	84.2	82.7	1	1.93392	1.05979	1.04091
P35613	Basigin OS=Homo sapiens GN=BSG PE=1 SV=2	109.55	104.6	97.6	88.25	1	0.954815	0.890917	0.805568
P35754	Glutaredoxin-1 OS=Homo sapiens GN=GLRX PE=1 SV=2	107.35	97.05	113.3	82.3	1	0.904052	1.05543	0.766651
P35908	Keratin, type II cytoskeletal 2 epidermal OS=Homo sapiens GN=KRT2 PE=1 SV=2	66.45	119.5	156.15	57.9	1	1.79834	2.34989	0.871332
P36896	Activin receptor type-1B OS=Homo sapiens GN=ACVR1B PE=1 SV=1	87.8	125.3	86.1	100.8	1	1.42711	0.980638	1.14806
P36897	TGF-beta receptor type-1 OS=Homo sapiens GN=TGFBR1 PE=1 SV=1	122.05	76.9	70.85	130.25	1	0.63007	0.5805	1.06719
P36957	Dihydrolipoyllysine-residue succinyltransferase component of 2-oxoglutarate dehydrogenase complex, mitochondrial OS=Homo sapiens GN=DLST PE=1 SV=4	128.4	84.2	76.55	110.85	1	0.655763	0.596184	0.863318
P36980	Complement factor H-related protein 2 OS=Homo sapiens GN=CFHR2 PE=1 SV=1	64.75	80.85	198.35	56	1	1.24865	3.06332	0.864865
P37173	TGF-beta receptor type-2 OS=Homo sapiens GN=TGFBR2 PE=1 SV=2	110.1	61.15	70.35	158.4	1	0.555404	0.638965	1.43869
P37840	Alpha-synuclein OS=Homo sapiens GN=SNCA PE=1 SV=1	195.9	65.05	74.55	64.45	1	0.332057	0.380551	0.328994
P39059	Collagen alpha-1(XV) chain OS=Homo sapiens GN=COL15A1 PE=1 SV=2	146.3	74.3	108.5	70.9	1	0.507861	0.741627	0.484621
P39060	Collagen alpha-1(XVIII) chain OS=Homo sapiens GN=COL18A1 PE=1 SV=5	126.8	88.95	100.05	84.15	1	0.701498	0.789038	0.663644
P40121	Macrophage-capping protein OS=Homo sapiens GN=CAPG PE=1 SV=2	127.55	97.6	87.85	87	1	0.76519	0.68875	0.682085
P40189	Interleukin-6 receptor subunit beta OS=Homo sapiens GN=IL6ST PE=1 SV=2	113.65	84.65	102.65	99.05	1	0.744831	0.903212	0.871535
P40199	Carcinoembryonic antigen-related cell adhesion molecule 6 OS=Homo sapiens GN=CEACAM6 PE=1 SV=3	111.1	100.75	104.05	84.15	1	0.906841	0.936544	0.757426
P41217	OX-2 membrane glycoprotein OS=Homo sapiens GN=CD200 PE=1 SV=4	146.1	66.85	84.25	102.8	1	0.457563	0.57666	0.703628
P41222	Prostaglandin-H2 D-isomerase OS=Homo sapiens GN=PTGDS PE=1 SV=1	70.55	103	108.95	117.5	1	1.45996	1.54429	1.66549
P41271	Neuroblastoma suppressor of tumorigenicity 1 OS=Homo sapiens GN=NBL1 PE=1 SV=1	111.75	44.1	66.15	178	1	0.394631	0.591946	1.59284
P41439	Folate receptor gamma OS=Homo sapiens GN=FOLR3 PE=1 SV=1	48.45	69.05	136.85	145.7	1	1.42518	2.82456	3.00722
P42785	Lysosomal Pro-X carboxypeptidase OS=Homo sapiens GN=PRCP PE=1 SV=1	125.35	95.3	66.75	112.6	1	0.760271	0.532509	0.898285
P43121	Cell surface glycoprotein MUC18 OS=Homo sapiens GN=MCAM PE=1 SV=2	156.3	66.9	73.25	103.5	1	0.428023	0.46865	0.662188
P43251	Biotinidase OS=Homo sapiens GN=BTD PE=1 SV=2	116.8	68.85	92.35	122.05	1	0.589469	0.790668	1.04495
P43652	Afamin OS=Homo sapiens GN=AFM PE=1 SV=1	68.5	85.4	117.95	128.1	1	1.24672	1.7219	1.87007
P46531	Neurogenic locus notch homolog protein 1 OS=Homo sapiens GN=NOTCH1 PE=1 SV=4	81.8	144.1	107.2	66.9	1	1.76161	1.31051	0.817848
P46940	Ras GTPase-activating-like protein IQGAP1 OS=Homo sapiens GN=IQGAP1 PE=1 SV=1	76	157.25	95.3	71.45	1	2.06908	1.25395	0.940132
P48304	Lithostathine-1-beta OS=Homo sapiens GN=REG1B PE=1 SV=1	43.85	70.75	249	36.45	1	1.61345	5.67845	0.831243
P48551	Interferon alpha/beta receptor 2 OS=Homo sapiens GN=IFNAR2 PE=1 SV=1	126.6	48.9	87.2	137.25	1	0.386256	0.688784	1.08412
P48637	Glutathione synthetase OS=Homo sapiens GN=GSS PE=1 SV=1	141.1	68.15	71.9	118.8	1	0.482991	0.509568	0.841956
P48740	Mannan-binding lectin serine protease 1 OS=Homo sapiens GN=MASP1 PE=1 SV=3	79.5	102.7	128.95	88.85	1	1.29182	1.62201	1.11761
P48745	Protein NOV homolog OS=Homo sapiens GN=NOV PE=1 SV=1	87.55	132.5	92	87.9	1	1.51342	1.05083	1.004
P49747	Cartilage oligomeric matrix protein OS=Homo sapiens GN=COMP PE=1 SV=2	82.65	128.15	87	102.2	1	1.55051	1.05263	1.23654
P49788	Retinoic acid receptor responder protein 1 OS=Homo sapiens GN=RARRES1 PE=2 SV=2	121.2	76.1	70.9	131.8	1	0.627888	0.584983	1.08746
P49908	Selenoprotein P OS=Homo sapiens GN=SEPP1 PE=1 SV=3	76.55	92.25	138.75	92.45	1	1.20509	1.81254	1.20771
P49913	Cathelicidin antimicrobial peptide OS=Homo sapiens GN=CAMP PE=1 SV=1	64.65	143.9	95.85	95.6	1	2.22583	1.4826	1.47873
P50895	Basal cell adhesion molecule OS=Homo sapiens GN=BCAM PE=1 SV=2	154.2	62.5	62.45	120.75	1	0.405318	0.404994	0.783074
P50897	Palmitoyl-protein thioesterase 1 OS=Homo sapiens GN=PPT1 PE=1 SV=1	88.2	111.2	77.45	123.15	1	1.26077	0.878118	1.39626
P51654	Glypican-3 OS=Homo sapiens GN=GPC3 PE=1 SV=1	122.25	70.35	76.05	131.35	1	0.57546	0.622086	1.07444
P51688	N-sulphoglucosamine sulphohydrolase OS=Homo sapiens GN=SGSH PE=1 SV=1	125.7	77.8	66.95	129.55	1	0.618934	0.532617	1.03063
P51858	Hepatoma-derived growth factor OS=Homo sapiens GN=HDGF PE=1 SV=1	165.9	75.05	65.65	93.4	1	0.452381	0.39572	0.56299
P51884	Lumican OS=Homo sapiens GN=LUM PE=1 SV=2	140	73	85.1	101.9	1	0.521429	0.607857	0.727857
P52799	Ephrin-B2 OS=Homo sapiens GN=EFNB2 PE=1 SV=1	93.4	95.8	111.6	99.25	1	1.0257	1.19486	1.06263
P52823	Stanniocalcin-1 OS=Homo sapiens GN=STC1 PE=1 SV=1	98.15	92.55	87.15	122.1	1	0.942944	0.887927	1.24401
P53634	Dipeptidyl peptidase 1 OS=Homo sapiens GN=CTSC PE=1 SV=2	83.2	108.55	125.55	82.7	1	1.30469	1.50901	0.99399
P54107	Cysteine-rich secretory protein 1 OS=Homo sapiens GN=CRISP1 PE=1 SV=1	55.35	117.1	36.8	190.8	1	2.11563	0.66486	3.44715
P54108	Cysteine-rich secretory protein 3 OS=Homo sapiens GN=CRISP3 PE=1 SV=1	92.75	105.25	93	108.95	1	1.13477	1.0027	1.17466
P54727	UV excision repair protein RAD23 homolog B OS=Homo sapiens GN=RAD23B PE=1 SV=1	159.45	61.85	76.4	102.3	1	0.387896	0.479147	0.64158
P54760	Ephrin type-B receptor 4 OS=Homo sapiens GN=EPHB4 PE=1 SV=2	108.6	85.15	116.85	89.45	1	0.78407	1.07597	0.823665
P54764	Ephrin type-A receptor 4 OS=Homo sapiens GN=EPHA4 PE=1 SV=1	98.35	79.65	119.25	102.7	1	0.809863	1.21251	1.04423
P54802	Alpha-N-acetylglucosaminidase OS=Homo sapiens GN=NAGLU PE=1 SV=2	142	73.6	67.7	116.7	1	0.51831	0.476761	0.821831
P54826	Growth arrest-specific protein 1 OS=Homo sapiens GN=GAS1 PE=1 SV=2	108.1	112.9	77.15	101.85	1	1.0444	0.713691	0.942183
P55000	Secreted Ly-6/uPAR-related protein 1 OS=Homo sapiens GN=SLURP1 PE=1 SV=2	70	103.9	143.6	82.45	1	1.48429	2.05143	1.17786
P55268	Laminin subunit beta-2 OS=Homo sapiens GN=LAMB2 PE=1 SV=2	92	132.1	93.9	82	1	1.43587	1.02065	0.891304
P55285	Cadherin-6 OS=Homo sapiens GN=CDH6 PE=1 SV=1	207.35	35.9	46.25	110.45	1	0.173137	0.223053	0.532674
P55287	Cadherin-11 OS=Homo sapiens GN=CDH11 PE=1 SV=2	165.3	64.1	66.25	104.3	1	0.38778	0.400786	0.630974
P55290	Cadherin-13 OS=Homo sapiens GN=CDH13 PE=1 SV=1	139.75	60.05	57.1	143.15	1	0.429696	0.408587	1.02433
P58499	Protein FAM3B OS=Homo sapiens GN=FAM3B PE=1 SV=2	158.45	65.2	68.8	107.55	1	0.411486	0.434206	0.678763
P59665	Neutrophil defensin 1 OS=Homo sapiens GN=DEFA1 PE=1 SV=1	99.5	137.7	95.4	67.4	1	1.38392	0.958794	0.677387
P60174	Triosephosphate isomerase OS=Homo sapiens GN=TPI1 PE=1 SV=3	128.75	61.15	65.8	144.35	1	0.474951	0.511068	1.12117
P60709	Actin, cytoplasmic 1 OS=Homo sapiens GN=ACTB PE=1 SV=1	150.2	81	79.85	88.95	1	0.539281	0.531625	0.59221
P61626	Lysozyme C OS=Homo sapiens GN=LYZ PE=1 SV=1	80.35	207	73.8	38.85	1	2.57623	0.918482	0.48351
P61769	Beta-2-microglobulin OS=Homo sapiens GN=B2M PE=1 SV=1	140.45	42.05	108.45	109.05	1	0.299395	0.772161	0.776433
P61916	Epididymal secretory protein E1 OS=Homo sapiens GN=NPC2 PE=1 SV=1	67.15	127.35	84.1	121.4	1	1.8965	1.25242	1.80789
P62158	Calmodulin OS=Homo sapiens GN=CALM1 PE=1 SV=2	134.6	67.25	57.15	140.95	1	0.499629	0.424591	1.04718
P62937	Peptidyl-prolyl cis-trans isomerase A OS=Homo sapiens GN=PPIA PE=1 SV=2	216.05	41.25	68.85	73.9	1	0.190928	0.318676	0.34205
P62979	Ubiquitin-40S ribosomal protein S27a OS=Homo sapiens GN=RPS27A PE=1 SV=2	115.25	113.45	98.95	72.4	1	0.984382	0.858568	0.6282
P63208	S-phase kinase-associated protein 1 OS=Homo sapiens GN=SKP1 PE=1 SV=2	125.5	79.1	76.55	118.75	1	0.630279	0.60996	0.946215
P67936	Tropomyosin alpha-4 chain OS=Homo sapiens GN=TPM4 PE=1 SV=3	132.9	113.65	86.85	66.6	1	0.855154	0.653499	0.501129
P68036	Ubiquitin-conjugating enzyme E2 L3 OS=Homo sapiens GN=UBE2L3 PE=1 SV=1	158.65	77.25	86.05	78	1	0.486921	0.542389	0.491648
P68871	Hemoglobin subunit beta OS=Homo sapiens GN=HBB PE=1 SV=2	236.7	52.6	59.3	51.4	1	0.222222	0.250528	0.217153
P69905	Hemoglobin subunit alpha OS=Homo sapiens GN=HBA1 PE=1 SV=2	225.8	49.9	69.15	55.15	1	0.220992	0.306244	0.244243
P78310	Coxsackievirus and adenovirus receptor OS=Homo sapiens GN=CXADR PE=1 SV=1	63	107.35	134.45	95.25	1	1.70397	2.13413	1.5119
P78324	Tyrosine-protein phosphatase non-receptor type substrate 1 OS=Homo sapiens GN=SIRPA PE=1 SV=2	96.7	117.7	82.65	102.9	1	1.21717	0.854705	1.06412
P78380	Oxidized low-density lipoprotein receptor 1 OS=Homo sapiens GN=OLR1 PE=1 SV=1	133.2	88.8	81.55	96.4	1	0.666667	0.612237	0.723724
P78504	Protein jagged-1 OS=Homo sapiens GN=JAG1 PE=1 SV=3	104.3	129.75	89.35	76.6	1	1.24401	0.856663	0.73442
P80188	Neutrophil gelatinase-associated lipocalin OS=Homo sapiens GN=LCN2 PE=1 SV=2	72.65	141.05	109.5	76.8	1	1.9415	1.50723	1.05712
P80303	Nucleobindin-2 OS=Homo sapiens GN=NUCB2 PE=1 SV=2	107.8	70.55	51.6	170.1	1	0.654453	0.478664	1.57792
P80370	Protein delta homolog 1 OS=Homo sapiens GN=DLK1 PE=1 SV=3	57.85	142.8	87.8	111.5	1	2.46845	1.51772	1.9274
P80511	Protein S100-A12 OS=Homo sapiens GN=S100A12 PE=1 SV=2	62.35	288.3	27.3	22.05	1	4.6239	0.437851	0.353649
P80723	Brain acid soluble protein 1 OS=Homo sapiens GN=BASP1 PE=1 SV=2	76.4	154.7	86.5	82.4	1	2.02487	1.1322	1.07853
P80748	Ig lambda chain V-III region LOI OS=Homo sapiens PE=1 SV=1	98.2	74.7	141.95	85.15	1	0.760692	1.44552	0.867108
P98088	Mucin-5AC (Fragments) OS=Homo sapiens GN=MUC5AC PE=1 SV=3	85.75	171.55	74.15	68.55	1	2.00058	0.864723	0.799417
P98095	Fibulin-2 OS=Homo sapiens GN=FBLN2 PE=1 SV=2	80.6	125	111.25	83.15	1	1.55087	1.38027	1.03164
P98160	Basement membrane-specific heparan sulfate proteoglycan core protein OS=Homo sapiens GN=HSPG2 PE=1 SV=4	120.75	86.75	78.85	113.7	1	0.718427	0.653002	0.941615
P98164	Low-density lipoprotein receptor-related protein 2 OS=Homo sapiens GN=LRP2 PE=1 SV=3	103.9	96.35	96	103.75	1	0.927334	0.923965	0.998556
P98172	Ephrin-B1 OS=Homo sapiens GN=EFNB1 PE=1 SV=1	92.95	95.45	119.55	92.1	1	1.0269	1.28618	0.990855
P99999	Cytochrome c OS=Homo sapiens GN=CYCS PE=1 SV=2	131.4	98.55	72.75	97.3	1	0.75	0.553653	0.740487
Q01151	CD83 antigen OS=Homo sapiens GN=CD83 PE=1 SV=1	87.25	136.35	87.8	88.55	1	1.56275	1.0063	1.0149
Q01459	Di-N-acetylchitobiase OS=Homo sapiens GN=CTBS PE=1 SV=1	94.4	111.55	99.15	94.9	1	1.18167	1.05032	1.0053
Q01469	Fatty acid-binding protein, epidermal OS=Homo sapiens GN=FABP5 PE=1 SV=3	121.55	62.4	79.6	136.45	1	0.513369	0.654875	1.12258
Q01973	Tyrosine-protein kinase transmembrane receptor ROR1 OS=Homo sapiens GN=ROR1 PE=1 SV=2	120.95	91.2	76.1	111.8	1	0.754031	0.629186	0.924349
Q02383	Semenogelin-2 OS=Homo sapiens GN=SEMG2 PE=1 SV=1	140.8	94.75	51.25	113.2	1	0.67294	0.363991	0.803977
Q02413	Desmoglein-1 OS=Homo sapiens GN=DSG1 PE=1 SV=2	111	96.2	111.15	81.7	1	0.866667	1.00135	0.736036
Q02487	Desmocollin-2 OS=Homo sapiens GN=DSC2 PE=1 SV=1	117.4	88.8	107.05	86.8	1	0.756388	0.91184	0.739353
Q02747	Guanylin OS=Homo sapiens GN=GUCA2A PE=1 SV=2	121.8	121.9	66.2	90.05	1	1.00082	0.543514	0.739327
Q02818	Nucleobindin-1 OS=Homo sapiens GN=NUCB1 PE=1 SV=4	146	61.9	61.65	130.45	1	0.423973	0.42226	0.893493
Q03154	Aminoacylase-1 OS=Homo sapiens GN=ACY1 PE=1 SV=1	109.7	96.85	82.7	110.8	1	0.882862	0.753874	1.01003
Q03403	Trefoil factor 2 OS=Homo sapiens GN=TFF2 PE=1 SV=2	78.2	120.2	66.1	135.5	1	1.53708	0.845269	1.73274
Q03405	Urokinase plasminogen activator surface receptor OS=Homo sapiens GN=PLAUR PE=1 SV=1	96.8	139.85	78.4	84.95	1	1.44473	0.809917	0.877583
Q04721	Neurogenic locus notch homolog protein 2 OS=Homo sapiens GN=NOTCH2 PE=1 SV=3	76.2	147.1	96.85	79.85	1	1.93045	1.271	1.0479
Q04756	Hepatocyte growth factor activator OS=Homo sapiens GN=HGFAC PE=1 SV=1	81.25	91.4	118.3	109.05	1	1.12492	1.456	1.34215
Q04771	Activin receptor type-1 OS=Homo sapiens GN=ACVR1 PE=1 SV=1	60.2	172.4	91.45	75.9	1	2.86379	1.5191	1.2608
Q05707	Collagen alpha-1(XIV) chain OS=Homo sapiens GN=COL14A1 PE=1 SV=3	108.95	115.85	83.1	92.1	1	1.06333	0.762735	0.845342
Q06033	Inter-alpha-trypsin inhibitor heavy chain H3 OS=Homo sapiens GN=ITIH3 PE=1 SV=2	62.4	89.65	187.3	60.6	1	1.4367	3.0016	0.971154
Q06481	Amyloid-like protein 2 OS=Homo sapiens GN=APLP2 PE=1 SV=2	86.45	123.95	92.1	97.55	1	1.43378	1.06536	1.1284
Q06830	Peroxiredoxin-1 OS=Homo sapiens GN=PRDX1 PE=1 SV=1	136.45	74.9	75.15	113.5	1	0.548919	0.550751	0.831807
Q07075	Glutamyl aminopeptidase OS=Homo sapiens GN=ENPEP PE=1 SV=3	108.35	94.95	103.55	93.15	1	0.876327	0.955699	0.859714
Q07507	Dermatopontin OS=Homo sapiens GN=DPT PE=2 SV=2	78.7	113.1	133.85	74.4	1	1.4371	1.70076	0.945362
Q07654	Trefoil factor 3 OS=Homo sapiens GN=TFF3 PE=1 SV=1	58.7	143.5	137.5	60.3	1	2.44463	2.34242	1.02726
Q07954	Prolow-density lipoprotein receptor-related protein 1 OS=Homo sapiens GN=LRP1 PE=1 SV=2	84.2	136.15	81.65	98	1	1.61698	0.969715	1.1639
Q08174	Protocadherin-1 OS=Homo sapiens GN=PCDH1 PE=1 SV=2	175.7	64.2	64.2	95.9	1	0.365396	0.365396	0.545817
Q08188	Protein-glutamine gamma-glutamyltransferase E OS=Homo sapiens GN=TGM3 PE=1 SV=4	102.85	137.4	89.1	70.65	1	1.33593	0.86631	0.686923
Q08345	Epithelial discoidin domain-containing receptor 1 OS=Homo sapiens GN=DDR1 PE=1 SV=1	129.85	69.7	56	144.45	1	0.536773	0.431267	1.11244
Q08380	Galectin-3-binding protein OS=Homo sapiens GN=LGALS3BP PE=1 SV=1	93.2	102.75	102.4	101.65	1	1.10247	1.09871	1.09067
Q08554	Desmocollin-1 OS=Homo sapiens GN=DSC1 PE=1 SV=2	65.1	87.15	172.35	75.4	1	1.33871	2.64747	1.15822
Q08629	Testican-1 OS=Homo sapiens GN=SPOCK1 PE=1 SV=1	118.05	88.95	88.1	104.9	1	0.753494	0.746294	0.888607
Q08722	Leukocyte surface antigen CD47 OS=Homo sapiens GN=CD47 PE=1 SV=1	108.15	108.45	87.45	96	1	1.00277	0.808599	0.887656
Q09666	Neuroblast differentiation-associated protein AHNAK OS=Homo sapiens GN=AHNAK PE=1 SV=2	121.55	94.8	94.5	89.15	1	0.779926	0.777458	0.733443
Q10588	ADP-ribosyl cyclase 2 OS=Homo sapiens GN=BST1 PE=1 SV=2	117.15	62.3	66.1	154.45	1	0.531797	0.564234	1.3184
Q12805	EGF-containing fibulin-like extracellular matrix protein 1 OS=Homo sapiens GN=EFEMP1 PE=1 SV=2	84.05	97.45	145.05	73.4	1	1.15943	1.72576	0.87329
Q12841	Follistatin-related protein 1 OS=Homo sapiens GN=FSTL1 PE=1 SV=1	142.65	76.4	55.35	125.65	1	0.535577	0.388013	0.880827
Q12860	Contactin-1 OS=Homo sapiens GN=CNTN1 PE=1 SV=1	116.6	99.95	99.2	84.3	1	0.857204	0.850772	0.722985
Q12864	Cadherin-17 OS=Homo sapiens GN=CDH17 PE=1 SV=3	137.05	86.55	86.15	90.3	1	0.631521	0.628603	0.658884
Q12907	Vesicular integral-membrane protein VIP36 OS=Homo sapiens GN=LMAN2 PE=1 SV=1	146.9	51	55.7	146.4	1	0.347175	0.37917	0.996596
Q12913	Receptor-type tyrosine-protein phosphatase eta OS=Homo sapiens GN=PTPRJ PE=1 SV=3	104.45	111.15	96.4	88.1	1	1.06415	0.92293	0.843466
Q13145	BMP and activin membrane-bound inhibitor homolog OS=Homo sapiens GN=BAMBI PE=1 SV=1	92	128.75	97.2	82.05	1	1.39946	1.05652	0.891848
Q13228	Selenium-binding protein 1 OS=Homo sapiens GN=SELENBP1 PE=1 SV=2	135.55	106.9	64.65	92.95	1	0.788639	0.476946	0.685725
Q13291	Signaling lymphocytic activation molecule OS=Homo sapiens GN=SLAMF1 PE=1 SV=1	111.9	89.85	89.85	108.4	1	0.802949	0.802949	0.968722
Q13308	Inactive tyrosine-protein kinase 7 OS=Homo sapiens GN=PTK7 PE=1 SV=2	145.65	77.1	68.45	108.8	1	0.529351	0.469962	0.746996
Q13332	Receptor-type tyrosine-protein phosphatase S OS=Homo sapiens GN=PTPRS PE=1 SV=3	86.5	113.75	113.85	85.95	1	1.31503	1.31618	0.993642
Q13421	Mesothelin OS=Homo sapiens GN=MSLN PE=1 SV=2	145.95	51.9	50.15	152	1	0.355601	0.343611	1.04145
Q13443	Disintegrin and metalloproteinase domain-containing protein 9 OS=Homo sapiens GN=ADAM9 PE=1 SV=1	186.05	51.2	55.1	107.6	1	0.275195	0.296157	0.578339
Q13449	Limbic system-associated membrane protein OS=Homo sapiens GN=LSAMP PE=1 SV=2	136.1	70.05	60.4	133.5	1	0.514695	0.443791	0.980896
Q13477	Mucosal addressin cell adhesion molecule 1 OS=Homo sapiens GN=MADCAM1 PE=1 SV=2	138.1	78.55	76.25	107.15	1	0.568791	0.552136	0.775887
Q13508	Ecto-ADP-ribosyltransferase 3 OS=Homo sapiens GN=ART3 PE=1 SV=2	59.75	172.65	100.8	66.75	1	2.88954	1.68703	1.11715
Q13510	Acid ceramidase OS=Homo sapiens GN=ASAH1 PE=1 SV=5	90.7	87.55	89.25	132.6	1	0.96527	0.984013	1.46196
Q13591	Semaphorin-5A OS=Homo sapiens GN=SEMA5A PE=1 SV=3	106.15	123.3	86.2	84.4	1	1.16156	0.812058	0.795101
Q13740	CD166 antigen OS=Homo sapiens GN=ALCAM PE=1 SV=2	114.95	76.45	90.2	118.45	1	0.665072	0.784689	1.03045
Q13873	Bone morphogenetic protein receptor type-2 OS=Homo sapiens GN=BMPR2 PE=1 SV=2	83.9	128.8	77.5	109.75	1	1.53516	0.923719	1.3081
Q14112	Nidogen-2 OS=Homo sapiens GN=NID2 PE=1 SV=3	75.55	140.9	103.8	79.75	1	1.86499	1.37392	1.05559
Q14118	Dystroglycan OS=Homo sapiens GN=DAG1 PE=1 SV=2	154.6	71.35	65.1	108.95	1	0.461514	0.421087	0.704722
Q14126	Desmoglein-2 OS=Homo sapiens GN=DSG2 PE=1 SV=2	126.25	89.4	87.05	97.25	1	0.708119	0.689505	0.770297
Q14210	Lymphocyte antigen 6D OS=Homo sapiens GN=LY6D PE=1 SV=1	63.15	164.65	119.05	53.15	1	2.60728	1.88519	0.841647
Q14314	Fibroleukin OS=Homo sapiens GN=FGL2 PE=1 SV=1	87.8	112.85	120.4	78.9	1	1.28531	1.3713	0.898633
Q14315	Filamin-C OS=Homo sapiens GN=FLNC PE=1 SV=3	70.25	129.9	120.65	79.25	1	1.84911	1.71744	1.12811
Q14393	Growth arrest-specific protein 6 OS=Homo sapiens GN=GAS6 PE=1 SV=2	103.9	77.2	87.45	131.5	1	0.743022	0.841675	1.26564
Q14508	WAP four-disulfide core domain protein 2 OS=Homo sapiens GN=WFDC2 PE=1 SV=2	76.05	138.45	95.05	90.4	1	1.82051	1.24984	1.18869
Q14515	SPARC-like protein 1 OS=Homo sapiens GN=SPARCL1 PE=1 SV=2	116.4	64.85	69.15	149.55	1	0.557131	0.594072	1.28479
Q14520	Hyaluronan-binding protein 2 OS=Homo sapiens GN=HABP2 PE=1 SV=1	77.2	78.35	169.55	75	1	1.0149	2.19624	0.971503
Q14624	Inter-alpha-trypsin inhibitor heavy chain H4 OS=Homo sapiens GN=ITIH4 PE=1 SV=4	97.75	93.25	140.35	68.6	1	0.953964	1.43581	0.70179
Q14766	Latent-transforming growth factor beta-binding protein 1 OS=Homo sapiens GN=LTBP1 PE=1 SV=4	82.6	130.95	98.65	87.8	1	1.58535	1.19431	1.06295
Q14767	Latent-transforming growth factor beta-binding protein 2 OS=Homo sapiens GN=LTBP2 PE=1 SV=3	84.9	120.7	82.5	111.95	1	1.42167	0.971731	1.31861
Q14982	Opioid-binding protein/cell adhesion molecule OS=Homo sapiens GN=OPCML PE=1 SV=1	133.05	92.7	69.7	104.6	1	0.696731	0.523863	0.786171
Q15043	Zinc transporter ZIP14 OS=Homo sapiens GN=SLC39A14 PE=1 SV=3	146.05	66.2	71.85	115.9	1	0.453269	0.491955	0.793564
Q15113	Procollagen C-endopeptidase enhancer 1 OS=Homo sapiens GN=PCOLCE PE=1 SV=2	105.65	99.35	124	71	1	0.940369	1.17369	0.67203
Q15223	Poliovirus receptor-related protein 1 OS=Homo sapiens GN=PVRL1 PE=1 SV=3	188.8	43.9	42.95	124.3	1	0.232521	0.227489	0.658369
Q15375	Ephrin type-A receptor 7 OS=Homo sapiens GN=EPHA7 PE=1 SV=3	136.35	73.2	78	112.45	1	0.536854	0.572057	0.824716
Q15485	Ficolin-2 OS=Homo sapiens GN=FCN2 PE=1 SV=2	160.95	76.1	69.3	93.65	1	0.472818	0.430568	0.581858
Q15746	Myosin light chain kinase, smooth muscle OS=Homo sapiens GN=MYLK PE=1 SV=4	159.75	66.35	65	108.9	1	0.415336	0.406886	0.68169
Q15828	Cystatin-M OS=Homo sapiens GN=CST6 PE=1 SV=1	65.35	84.7	185.05	64.9	1	1.2961	2.83168	0.993114
Q15848	Adiponectin OS=Homo sapiens GN=ADIPOQ PE=1 SV=1	77.6	114.3	138.5	69.65	1	1.47294	1.78479	0.897552
Q16270	Insulin-like growth factor-binding protein 7 OS=Homo sapiens GN=IGFBP7 PE=1 SV=1	115.4	125.95	57.2	101.55	1	1.09142	0.495667	0.879983
Q16363	Laminin subunit alpha-4 OS=Homo sapiens GN=LAMA4 PE=1 SV=4	106.95	132.45	79.25	81.35	1	1.23843	0.741	0.760636
Q16610	Extracellular matrix protein 1 OS=Homo sapiens GN=ECM1 PE=1 SV=2	54.1	150.5	91.1	104.3	1	2.78189	1.68392	1.92791
Q16651	Prostasin OS=Homo sapiens GN=PRSS8 PE=1 SV=1	111	108.45	93.95	86.55	1	0.977027	0.846396	0.77973
Q16769	Glutaminyl-peptide cyclotransferase OS=Homo sapiens GN=QPCT PE=1 SV=1	88.7	92.9	54.1	164.3	1	1.04735	0.609921	1.85231
Q16787	Laminin subunit alpha-3 OS=Homo sapiens GN=LAMA3 PE=1 SV=2	87.4	134.05	95.5	83.05	1	1.53375	1.09268	0.950229
Q16832	Discoidin domain-containing receptor 2 OS=Homo sapiens GN=DDR2 PE=1 SV=2	125.25	77.25	77.25	120.2	1	0.616766	0.616766	0.959681
Q16849	Receptor-type tyrosine-protein phosphatase-like N OS=Homo sapiens GN=PTPRN PE=1 SV=1	117.6	101.15	83.9	97.35	1	0.860119	0.713435	0.827806
Q2UY09	Collagen alpha-1(XXVIII) chain OS=Homo sapiens GN=COL28A1 PE=2 SV=2	79.3	157.1	86.2	77.4	1	1.98108	1.08701	0.97604
Q5FWE3	Proline-rich transmembrane protein 3 OS=Homo sapiens GN=PRRT3 PE=1 SV=3	107.3	128.1	79.55	85.05	1	1.19385	0.741379	0.792637
Q5IJ48	Crumbs homolog 2 OS=Homo sapiens GN=CRB2 PE=1 SV=2	115.55	84.65	84.45	115.4	1	0.732583	0.730852	0.998702
Q5JRA6	Melanoma inhibitory activity protein 3 OS=Homo sapiens GN=MIA3 PE=1 SV=1	116.25	78.55	81.35	123.85	1	0.675699	0.699785	1.06538
Q5JS37	NHL repeat-containing protein 3 OS=Homo sapiens GN=NHLRC3 PE=2 SV=1	88.95	100.4	76.65	134	1	1.12872	0.86172	1.50646
Q5KU26	Collectin-12 OS=Homo sapiens GN=COLEC12 PE=1 SV=3	80.15	92.65	112.1	115.1	1	1.15596	1.39863	1.43606
Q5VY43	Platelet endothelial aggregation receptor 1 OS=Homo sapiens GN=PEAR1 PE=1 SV=1	88.05	139.9	98.85	73.2	1	1.58887	1.12266	0.831346
Q5ZPR3	CD276 antigen OS=Homo sapiens GN=CD276 PE=1 SV=1	109.5	118.45	76.75	95.25	1	1.08174	0.700913	0.869863
Q68D85	Natural cytotoxicity triggering receptor 3 ligand 1 OS=Homo sapiens GN=NCR3LG1 PE=1 SV=1	154	45.75	76.5	123.8	1	0.297078	0.496753	0.803896
Q6EMK4	Vasorin OS=Homo sapiens GN=VASN PE=1 SV=1	114.75	98.8	94.7	91.75	1	0.861002	0.825272	0.799564
Q6FHJ7	Secreted frizzled-related protein 4 OS=Homo sapiens GN=SFRP4 PE=1 SV=2	70.4	124.65	93.65	111.3	1	1.7706	1.33026	1.58097
Q6GTX8	Leukocyte-associated immunoglobulin-like receptor 1 OS=Homo sapiens GN=LAIR1 PE=1 SV=1	86.55	123.65	78	111.8	1	1.42865	0.901213	1.29174
Q6ISS4	Leukocyte-associated immunoglobulin-like receptor 2 OS=Homo sapiens GN=LAIR2 PE=2 SV=1	97.05	109.6	80.5	112.85	1	1.12931	0.829469	1.1628
Q6P4A8	Phospholipase B-like 1 OS=Homo sapiens GN=PLBD1 PE=1 SV=2	79.9	210.55	51.95	57.6	1	2.63517	0.650188	0.720901
Q6PK18	PKHD domain-containing transmembrane protein C17orf101 OS=Homo sapiens GN=C17orf101 PE=2 SV=2	161.25	75.55	63.75	99.4	1	0.468527	0.395349	0.616434
Q6UVK1	Chondroitin sulfate proteoglycan 4 OS=Homo sapiens GN=CSPG4 PE=1 SV=2	108.25	90.1	102.6	99.05	1	0.832333	0.947806	0.915012
Q6UWL2	Sushi domain-containing protein 1 OS=Homo sapiens GN=SUSD1 PE=1 SV=1	98.15	125.6	91.4	84.8	1	1.27967	0.931228	0.863984
Q6UX15	Layilin OS=Homo sapiens GN=LAYN PE=2 SV=1	100.9	84.7	74.65	139.75	1	0.839445	0.739841	1.38503
Q6UX71	Plexin domain-containing protein 2 OS=Homo sapiens GN=PLXDC2 PE=1 SV=1	112.25	81.25	112.6	93.9	1	0.723831	1.00312	0.836526
Q6UXB4	C-type lectin domain family 4 member G OS=Homo sapiens GN=CLEC4G PE=1 SV=1	115.3	98.15	101.55	84.9	1	0.851258	0.880746	0.73634
Q6UXB8	Peptidase inhibitor 16 OS=Homo sapiens GN=PI16 PE=1 SV=1	99.35	81.95	78.15	140.55	1	0.824862	0.786613	1.4147
Q6UXD5	Seizure 6-like protein 2 OS=Homo sapiens GN=SEZ6L2 PE=1 SV=2	99.15	107.05	81.9	111.85	1	1.07968	0.826021	1.12809
Q6UXG3	CMRF35-like molecule 9 OS=Homo sapiens GN=CD300LG PE=1 SV=2	116	86.3	67.35	130.35	1	0.743966	0.580603	1.12371
Q6UXK5	Leucine-rich repeat neuronal protein 1 OS=Homo sapiens GN=LRRN1 PE=1 SV=1	93.3	113.25	103.1	90.3	1	1.21383	1.10504	0.967846
Q6UY11	Protein delta homolog 2 OS=Homo sapiens GN=DLK2 PE=2 SV=1	84.3	153.65	85.15	76.95	1	1.82266	1.01008	0.912811
Q6UY14	ADAMTS-like protein 4 OS=Homo sapiens GN=ADAMTSL4 PE=1 SV=2	175.3	54.4	65.6	104.7	1	0.310325	0.374216	0.597262
Q6W4X9	Mucin-6 OS=Homo sapiens GN=MUC6 PE=1 SV=3	73.1	137.35	64.65	124.9	1	1.87893	0.884405	1.70862
Q6ZWJ8	Kielin/chordin-like protein OS=Homo sapiens GN=KCP PE=2 SV=2	73.8	127.1	125.7	73.45	1	1.72222	1.70325	0.995257
Q7KYR7	Butyrophilin subfamily 2 member A1 OS=Homo sapiens GN=BTN2A1 PE=1 SV=3	114	108.25	77.85	99.85	1	0.949561	0.682895	0.875877
Q7LBR1	Charged multivesicular body protein 1b OS=Homo sapiens GN=CHMP1B PE=1 SV=1	173.45	54.45	67.95	104.1	1	0.313923	0.391756	0.600173
Q7Z3B1	Neuronal growth regulator 1 OS=Homo sapiens GN=NEGR1 PE=1 SV=3	147.15	46.85	53.8	152.15	1	0.318383	0.365613	1.03398
Q7Z5L0	Vitelline membrane outer layer protein 1 homolog OS=Homo sapiens GN=VMO1 PE=1 SV=1	184.9	54.15	60.7	100.2	1	0.292861	0.328286	0.541915
Q7Z7G0	Target of Nesh-SH3 OS=Homo sapiens GN=ABI3BP PE=1 SV=1	137.35	75.75	61.2	125.65	1	0.551511	0.445577	0.914816
Q86SQ4	G-protein coupled receptor 126 OS=Homo sapiens GN=GPR126 PE=1 SV=3	102.2	106.05	112.25	79.5	1	1.03767	1.09834	0.777886
Q86T13	C-type lectin domain family 14 member A OS=Homo sapiens GN=CLEC14A PE=1 SV=1	148.75	77.05	82.6	91.6	1	0.517983	0.555294	0.615798
Q86TH1	ADAMTS-like protein 2 OS=Homo sapiens GN=ADAMTSL2 PE=1 SV=1	107.75	114.8	85.05	92.4	1	1.06543	0.789327	0.857541
Q86VB7	Scavenger receptor cysteine-rich type 1 protein M130 OS=Homo sapiens GN=CD163 PE=1 SV=2	109.55	103.7	110.05	76.7	1	0.9466	1.00456	0.700137
Q8IUL8	Cartilage intermediate layer protein 2 OS=Homo sapiens GN=CILP2 PE=2 SV=2	194.75	51.5	49	104.75	1	0.264442	0.251605	0.537869
Q8IV08	Phospholipase D3 OS=Homo sapiens GN=PLD3 PE=1 SV=1	146.6	66	73.1	114.35	1	0.450205	0.498636	0.780014
Q8IWT1	Sodium channel subunit beta-4 OS=Homo sapiens GN=SCN4B PE=1 SV=1	53	128.7	112.3	106	1	2.4283	2.11887	2
Q8IWU5	Extracellular sulfatase Sulf-2 OS=Homo sapiens GN=SULF2 PE=1 SV=1	143.7	102.25	69.45	84.55	1	0.711552	0.483299	0.588379
Q8IWY4	Signal peptide, CUB and EGF-like domain-containing protein 1 OS=Homo sapiens GN=SCUBE1 PE=1 SV=3	48.1	136.4	143.6	71.8	1	2.83576	2.98545	1.49272
Q8IX05	CD302 antigen OS=Homo sapiens GN=CD302 PE=1 SV=1	102.3	65.85	100.1	131.75	1	0.643695	0.978495	1.28788
Q8IZA0	Dyslexia-associated protein KIAA0319-like protein OS=Homo sapiens GN=KIAA0319L PE=1 SV=2	119.8	100.75	83.6	95.85	1	0.840985	0.69783	0.800083
Q8IZF2	Probable G-protein coupled receptor 116 OS=Homo sapiens GN=GPR116 PE=1 SV=3	117.8	99.4	81.8	101.05	1	0.843803	0.694397	0.85781
Q8IZP9	G-protein coupled receptor 64 OS=Homo sapiens GN=GPR64 PE=1 SV=2	70.35	144.65	96.95	88.1	1	2.05615	1.37811	1.25231
Q8N114	Protein shisa-5 OS=Homo sapiens GN=SHISA5 PE=2 SV=1	75.55	112.9	118	93.6	1	1.49437	1.56188	1.23891
Q8N126	Cell adhesion molecule 3 OS=Homo sapiens GN=CADM3 PE=1 SV=1	112.55	85.05	76.9	125.5	1	0.755664	0.683252	1.11506
Q8N2S1	Latent-transforming growth factor beta-binding protein 4 OS=Homo sapiens GN=LTBP4 PE=1 SV=2	78.65	127.55	109.15	84.7	1	1.62174	1.38779	1.07692
Q8N307	Mucin-20 OS=Homo sapiens GN=MUC20 PE=1 SV=3	118.45	92.45	74.45	114.6	1	0.780498	0.628535	0.967497
Q8N3J6	Cell adhesion molecule 2 OS=Homo sapiens GN=CADM2 PE=2 SV=1	128.95	93.3	68.05	109.65	1	0.723536	0.527724	0.85033
Q8N6Q3	CD177 antigen OS=Homo sapiens GN=CD177 PE=1 SV=2	78.8	134.05	119.45	67.6	1	1.70114	1.51586	0.857868
Q8NBJ4	Golgi membrane protein 1 OS=Homo sapiens GN=GOLM1 PE=1 SV=1	181.6	57.1	50.5	110.8	1	0.314427	0.278084	0.610132
Q8NCC3	Group XV phospholipase A2 OS=Homo sapiens GN=PLA2G15 PE=1 SV=2	145	61.4	75.95	117.7	1	0.423448	0.523793	0.811724
Q8NDA2	Hemicentin-2 OS=Homo sapiens GN=HMCN2 PE=2 SV=2	123.9	101.3	85.95	88.9	1	0.817595	0.693705	0.717514
Q8NFT8	Delta and Notch-like epidermal growth factor-related receptor OS=Homo sapiens GN=DNER PE=1 SV=1	103.15	120.1	87.75	89	1	1.16432	0.850703	0.862821
Q8NFZ8	Cell adhesion molecule 4 OS=Homo sapiens GN=CADM4 PE=1 SV=1	152.45	67.85	59.55	120.2	1	0.445064	0.39062	0.788455
Q8NHP8	Putative phospholipase B-like 2 OS=Homo sapiens GN=PLBD2 PE=1 SV=2	105.8	91.95	83.75	118.55	1	0.869093	0.791588	1.12051
Q8TB96	T-cell immunomodulatory protein OS=Homo sapiens GN=ITFG1 PE=1 SV=1	161.05	54.7	80.2	104.05	1	0.339646	0.497982	0.646073
Q8TCT8	Signal peptide peptidase-like 2A OS=Homo sapiens GN=SPPL2A PE=1 SV=2	101.1	109.55	65	124.35	1	1.08358	0.642928	1.22997
Q8TCZ2	CD99 antigen-like protein 2 OS=Homo sapiens GN=CD99L2 PE=2 SV=1	138	65.25	64.7	132	1	0.472826	0.468841	0.956522
Q8TDQ0	Hepatitis A virus cellular receptor 2 OS=Homo sapiens GN=HAVCR2 PE=1 SV=3	148.6	71.8	62.6	117	1	0.483176	0.421265	0.787349
Q8TDQ1	CMRF35-like molecule 1 OS=Homo sapiens GN=CD300LF PE=1 SV=3	96.85	80.95	71.3	150.9	1	0.835829	0.73619	1.55808
Q8TDY8	Immunoglobulin superfamily DCC subclass member 4 OS=Homo sapiens GN=IGDCC4 PE=2 SV=1	110.2	91.4	108.35	90.1	1	0.829401	0.983212	0.817604
Q8WU39	Plasma cell-induced resident endoplasmic reticulum protein OS=Homo sapiens GN=PACAP PE=1 SV=1	114.95	84.1	111.6	89.35	1	0.731622	0.970857	0.777294
Q8WVN6	Secreted and transmembrane protein 1 OS=Homo sapiens GN=SECTM1 PE=1 SV=2	154.5	69.75	83.25	92.5	1	0.451456	0.538835	0.598706
Q8WWZ8	Oncoprotein-induced transcript 3 protein OS=Homo sapiens GN=OIT3 PE=1 SV=2	135.9	73.05	80.85	110.2	1	0.537528	0.594923	0.81089
Q8WZ42	Titin OS=Homo sapiens GN=TTN PE=1 SV=4	79.55	101.7	128.75	90.05	1	1.27844	1.61848	1.13199
Q8WZ75	Roundabout homolog 4 OS=Homo sapiens GN=ROBO4 PE=1 SV=1	166.9	67.75	73.3	92.1	1	0.405932	0.439185	0.551827
Q92496	Complement factor H-related protein 4 OS=Homo sapiens GN=CFHR4 PE=1 SV=2	75.85	75.85	182.6	65.7	1	1	2.40738	0.866183
Q92520	Protein FAM3C OS=Homo sapiens GN=FAM3C PE=1 SV=1	140.3	63	73.85	122.8	1	0.449038	0.526372	0.875267
Q92563	Testican-2 OS=Homo sapiens GN=SPOCK2 PE=1 SV=1	114.45	92.4	78.1	115.1	1	0.807339	0.682394	1.00568
Q92626	Peroxidasin homolog OS=Homo sapiens GN=PXDN PE=1 SV=2	80.85	120.9	105.55	92.65	1	1.49536	1.3055	1.14595
Q92673	Sortilin-related receptor OS=Homo sapiens GN=SORL1 PE=1 SV=2	90.95	138.1	94.3	76.65	1	1.51842	1.03683	0.842771
Q92692	Poliovirus receptor-related protein 2 OS=Homo sapiens GN=PVRL2 PE=1 SV=1	150.3	51.6	54.9	143.15	1	0.343313	0.365269	0.952428
Q92765	Secreted frizzled-related protein 3 OS=Homo sapiens GN=FRZB PE=1 SV=2	81.75	92.85	128.6	96.9	1	1.13578	1.57309	1.18532
Q92820	Gamma-glutamyl hydrolase OS=Homo sapiens GN=GGH PE=1 SV=2	126.05	86.7	64.65	122.6	1	0.687822	0.512892	0.97263
Q92859	Neogenin OS=Homo sapiens GN=NEO1 PE=1 SV=2	132.5	87.85	90.85	88.85	1	0.663019	0.68566	0.670566
Q92876	Kallikrein-6 OS=Homo sapiens GN=KLK6 PE=1 SV=1	87.4	94.35	138.15	80.1	1	1.07952	1.58066	0.916476
Q92896	Golgi apparatus protein 1 OS=Homo sapiens GN=GLG1 PE=1 SV=2	129.35	99.75	75	95.95	1	0.771164	0.579822	0.741786
Q92954	Proteoglycan 4 OS=Homo sapiens GN=PRG4 PE=1 SV=2	50.05	113.25	147.9	88.8	1	2.26274	2.95504	1.77423
Q92956	Tumor necrosis factor receptor superfamily member 14 OS=Homo sapiens GN=TNFRSF14 PE=1 SV=3	78.9	133.9	96.3	90.9	1	1.69708	1.22053	1.15209
Q93091	Ribonuclease K6 OS=Homo sapiens GN=RNASE6 PE=1 SV=2	69	128.45	139.3	63.25	1	1.86159	2.01884	0.916667
Q969P0	Immunoglobulin superfamily member 8 OS=Homo sapiens GN=IGSF8 PE=1 SV=1	175.9	72.15	54.9	97.05	1	0.410176	0.312109	0.551734
Q96AP7	Endothelial cell-selective adhesion molecule OS=Homo sapiens GN=ESAM PE=1 SV=1	65.15	110.8	128.5	95.5	1	1.70069	1.97237	1.46585
Q96C19	EF-hand domain-containing protein D2 OS=Homo sapiens GN=EFHD2 PE=1 SV=1	94.5	176.3	66.25	63	1	1.86561	0.701058	0.666667
Q96DA0	Zymogen granule protein 16 homolog B OS=Homo sapiens GN=ZG16B PE=1 SV=3	157.85	81.5	75.4	85.3	1	0.516313	0.477669	0.540386
Q96DR8	Mucin-like protein 1 OS=Homo sapiens GN=MUCL1 PE=1 SV=1	85.25	127.6	66.35	120.85	1	1.49677	0.778299	1.4176
Q96FE7	Phosphoinositide-3-kinase-interacting protein 1 OS=Homo sapiens GN=PIK3IP1 PE=1 SV=2	80.65	142.8	81.4	95.15	1	1.77061	1.0093	1.17979
Q96HD1	Cysteine-rich with EGF-like domain protein 1 OS=Homo sapiens GN=CRELD1 PE=1 SV=3	90.15	100.2	105.6	104.05	1	1.11148	1.17138	1.15419
Q96J84	Kin of IRRE-like protein 1 OS=Homo sapiens GN=KIRREL PE=1 SV=2	158.1	62.4	65.7	113.75	1	0.394687	0.41556	0.719481
Q96JQ0	Protocadherin-16 OS=Homo sapiens GN=DCHS1 PE=2 SV=1	119.8	102.4	91.75	85.95	1	0.854758	0.76586	0.717446
Q96KN2	Beta-Ala-His dipeptidase OS=Homo sapiens GN=CNDP1 PE=1 SV=4	113.6	78.2	96.9	111.3	1	0.68838	0.852993	0.979754
Q96NY8	Poliovirus receptor-related protein 4 OS=Homo sapiens GN=PVRL4 PE=1 SV=1	177.2	64.65	64.7	93.45	1	0.364842	0.365124	0.52737
Q96NZ9	Proline-rich acidic protein 1 OS=Homo sapiens GN=PRAP1 PE=1 SV=2	152.3	88.05	78.05	81.55	1	0.578135	0.512475	0.535456
Q96PC5	Melanoma inhibitory activity protein 2 OS=Homo sapiens GN=MIA2 PE=2 SV=3	129.15	64	64.6	142.2	1	0.495548	0.500194	1.10105
Q96PD5	N-acetylmuramoyl-L-alanine amidase OS=Homo sapiens GN=PGLYRP2 PE=1 SV=1	94.25	93.35	93.85	118.5	1	0.990451	0.995756	1.25729
Q96PX8	SLIT and NTRK-like protein 1 OS=Homo sapiens GN=SLITRK1 PE=1 SV=2	96.25	109	93.55	101.25	1	1.13247	0.971948	1.05195
Q96RW7	Hemicentin-1 OS=Homo sapiens GN=HMCN1 PE=1 SV=2	121.05	96.95	98.6	83.4	1	0.800909	0.814539	0.688971
Q96S96	Phosphatidylethanolamine-binding protein 4 OS=Homo sapiens GN=PEBP4 PE=1 SV=3	73.95	119.75	121.85	84.45	1	1.61934	1.64773	1.14199
Q99497	Protein DJ-1 OS=Homo sapiens GN=PARK7 PE=1 SV=2	193.85	50.5	64.7	90.95	1	0.260511	0.333763	0.469177
Q99538	Legumain OS=Homo sapiens GN=LGMN PE=1 SV=1	99.8	112.85	94.15	93.2	1	1.13076	0.943387	0.933868
Q99574	Neuroserpin OS=Homo sapiens GN=SERPINI1 PE=1 SV=1	89.8	123.25	86.9	100.05	1	1.37249	0.967706	1.11414
Q99584	Protein S100-A13 OS=Homo sapiens GN=S100A13 PE=1 SV=1	137.95	81.3	76.3	104.45	1	0.589344	0.553099	0.757158
Q99715	Collagen alpha-1(XII) chain OS=Homo sapiens GN=COL12A1 PE=1 SV=2	107.45	111.5	85.5	95.55	1	1.03769	0.795719	0.889251
Q99969	Retinoic acid receptor responder protein 2 OS=Homo sapiens GN=RARRES2 PE=1 SV=1	145	82.9	68.4	103.7	1	0.571724	0.471724	0.715172
Q99988	Growth/differentiation factor 15 OS=Homo sapiens GN=GDF15 PE=1 SV=3	89.15	112.65	89.25	108.95	1	1.2636	1.00112	1.2221
Q9BRK3	Matrix-remodeling-associated protein 8 OS=Homo sapiens GN=MXRA8 PE=1 SV=1	192.7	52.5	64.15	90.6	1	0.272444	0.332901	0.470161
Q9BRT3	Migration and invasion enhancer 1 OS=Homo sapiens GN=MIEN1 PE=1 SV=1	120.05	94.9	85.1	99.95	1	0.790504	0.708871	0.83257
Q9BX67	Junctional adhesion molecule C OS=Homo sapiens GN=JAM3 PE=1 SV=1	95.95	122.25	85.9	95.95	1	1.2741	0.895258	1
Q9BXN2	C-type lectin domain family 7 member A OS=Homo sapiens GN=CLEC7A PE=1 SV=1	106.95	99.7	107.55	85.8	1	0.932211	1.00561	0.802244
Q9BXP8	Pappalysin-2 OS=Homo sapiens GN=PAPPA2 PE=1 SV=4	112.6	93.75	122.75	70.8	1	0.832593	1.09014	0.628774
Q9BY67	Cell adhesion molecule 1 OS=Homo sapiens GN=CADM1 PE=1 SV=2	175.4	68.5	52.3	103.75	1	0.390536	0.298176	0.591505
Q9BYE9	Cadherin-related family member 2 OS=Homo sapiens GN=CDHR2 PE=1 SV=2	115.7	92.3	86.45	105.55	1	0.797753	0.747191	0.912273
Q9BZG9	Ly-6/neurotoxin-like protein 1 OS=Homo sapiens GN=LYNX1 PE=1 SV=3	112.25	77.8	54	155.9	1	0.693096	0.481069	1.38886
Q9BZR6	Reticulon-4 receptor OS=Homo sapiens GN=RTN4R PE=1 SV=1	116.3	87.8	78.85	117.05	1	0.754944	0.677988	1.00645
Q9GZM7	Tubulointerstitial nephritis antigen-like OS=Homo sapiens GN=TINAGL1 PE=1 SV=1	116.95	97.85	84.9	100.25	1	0.836682	0.725951	0.857204
Q9GZX9	Twisted gastrulation protein homolog 1 OS=Homo sapiens GN=TWSG1 PE=2 SV=1	88.35	125.35	86.85	99.4	1	1.41879	0.983022	1.12507
Q9H0W9	Ester hydrolase C11orf54 OS=Homo sapiens GN=C11orf54 PE=1 SV=1	134.1	72.95	49.9	143	1	0.543997	0.37211	1.06637
Q9H1U4	Multiple epidermal growth factor-like domains protein 9 OS=Homo sapiens GN=MEGF9 PE=2 SV=3	98.5	137.95	79.75	83.75	1	1.40051	0.809645	0.850254
Q9H299	SH3 domain-binding glutamic acid-rich-like protein 3 OS=Homo sapiens GN=SH3BGRL3 PE=1 SV=1	165.95	59.55	73.55	101	1	0.358843	0.443206	0.608617
Q9H444	Charged multivesicular body protein 4b OS=Homo sapiens GN=CHMP4B PE=1 SV=1	175.95	58.2	69.5	96.4	1	0.330776	0.394999	0.547883
Q9H461	Frizzled-8 OS=Homo sapiens GN=FZD8 PE=1 SV=1	88.25	113.9	96	101.85	1	1.29065	1.08782	1.15411
Q9H665	IGF-like family receptor 1 OS=Homo sapiens GN=IGFLR1 PE=1 SV=1	56.65	177.75	96.85	68.75	1	3.13769	1.70962	1.21359
Q9H6B4	CXADR-like membrane protein OS=Homo sapiens GN=CLMP PE=1 SV=1	93.45	111.75	110.15	84.6	1	1.19583	1.17871	0.905297
Q9H6Y7	E3 ubiquitin-protein ligase RNF167 OS=Homo sapiens GN=RNF167 PE=1 SV=1	83.55	102.3	106.5	107.65	1	1.22442	1.27469	1.28845
Q9H8J5	MANSC domain-containing protein 1 OS=Homo sapiens GN=MANSC1 PE=2 SV=1	73.55	104.95	127.7	93.8	1	1.42692	1.73623	1.27532
Q9H8L6	Multimerin-2 OS=Homo sapiens GN=MMRN2 PE=1 SV=2	176	48.85	62.55	112.6	1	0.277557	0.355398	0.639773
Q9H9P2	Chondrolectin OS=Homo sapiens GN=CHODL PE=2 SV=2	141.65	65.9	60.95	131.5	1	0.465231	0.430286	0.928345
Q9HAT2	Sialate O-acetylesterase OS=Homo sapiens GN=SIAE PE=1 SV=1	133.25	67.95	62.65	136.05	1	0.509944	0.470169	1.02101
Q9HAV5	Tumor necrosis factor receptor superfamily member 27 OS=Homo sapiens GN=EDA2R PE=1 SV=2	88.7	114.95	115.3	81	1	1.29594	1.29989	0.913191
Q9HB40	Retinoid-inducible serine carboxypeptidase OS=Homo sapiens GN=SCPEP1 PE=1 SV=1	136.3	123.4	62.9	77.3	1	0.905356	0.461482	0.567131
Q9HBB8	Cadherin-related family member 5 OS=Homo sapiens GN=CDHR5 PE=1 SV=3	123.5	88.35	91.25	96.9	1	0.715385	0.738866	0.784615
Q9HBR0	Putative sodium-coupled neutral amino acid transporter 10 OS=Homo sapiens GN=SLC38A10 PE=1 SV=2	134.65	82.3	90.85	92.25	1	0.611214	0.674712	0.68511
Q9HC84	Mucin-5B OS=Homo sapiens GN=MUC5B PE=1 SV=3	114.3	171.1	62.85	51.8	1	1.49694	0.549869	0.453193
Q9HCN6	Platelet glycoprotein VI OS=Homo sapiens GN=GP6 PE=1 SV=4	106.35	99.5	81.45	112.8	1	0.93559	0.765867	1.06065
Q9HCU0	Endosialin OS=Homo sapiens GN=CD248 PE=1 SV=1	111.75	110.75	82.1	95.4	1	0.991051	0.734676	0.853691
Q9HD89	Resistin OS=Homo sapiens GN=RETN PE=2 SV=1	102.95	133.75	87.8	75.55	1	1.29917	0.852841	0.733851
Q9NNX6	CD209 antigen OS=Homo sapiens GN=CD209 PE=1 SV=1	71.85	99.25	125.3	103.6	1	1.38135	1.74391	1.44189
Q9NPF0	CD320 antigen OS=Homo sapiens GN=CD320 PE=1 SV=1	89.45	131.55	85	93.95	1	1.47065	0.950252	1.05031
Q9NPH3	Interleukin-1 receptor accessory protein OS=Homo sapiens GN=IL1RAP PE=1 SV=2	135.1	57.8	102.9	104.15	1	0.427831	0.761658	0.77091
Q9NPY3	Complement component C1q receptor OS=Homo sapiens GN=CD93 PE=1 SV=3	97.4	74.9	107.85	119.85	1	0.768994	1.10729	1.23049
Q9NQ36	Signal peptide, CUB and EGF-like domain-containing protein 2 OS=Homo sapiens GN=SCUBE2 PE=2 SV=2	76.35	104.65	109.05	109.85	1	1.37066	1.42829	1.43877
Q9NQ38	Serine protease inhibitor Kazal-type 5 OS=Homo sapiens GN=SPINK5 PE=1 SV=2	97.5	108.5	103.15	90.85	1	1.11282	1.05795	0.931795
Q9NQ84	G-protein coupled receptor family C group 5 member C OS=Homo sapiens GN=GPRC5C PE=1 SV=2	135.5	70	96.55	98	1	0.516605	0.712546	0.723247
Q9NQS3	Poliovirus receptor-related protein 3 OS=Homo sapiens GN=PVRL3 PE=1 SV=1	105.75	92.3	101.3	100.7	1	0.872813	0.95792	0.952246
Q9NR99	Matrix-remodeling-associated protein 5 OS=Homo sapiens GN=MXRA5 PE=2 SV=3	183.75	64.3	64.8	87.2	1	0.349932	0.352653	0.474558
Q9NS68	Tumor necrosis factor receptor superfamily member 19 OS=Homo sapiens GN=TNFRSF19 PE=1 SV=1	72.35	135.9	103.5	88.25	1	1.87837	1.43055	1.21977
Q9NY25	C-type lectin domain family 5 member A OS=Homo sapiens GN=CLEC5A PE=1 SV=1	94.55	134.7	84.35	86.4	1	1.42464	0.892121	0.913802
Q9NZD4	Alpha-hemoglobin-stabilizing protein OS=Homo sapiens GN=AHSP PE=1 SV=1	187.2	87.9	60.1	64.85	1	0.469551	0.321047	0.346421
Q9NZH0	G-protein coupled receptor family C group 5 member B OS=Homo sapiens GN=GPRC5B PE=2 SV=2	126.95	93.25	89.3	90.45	1	0.734541	0.703427	0.712485
Q9NZP8	Complement C1r subcomponent-like protein OS=Homo sapiens GN=C1RL PE=1 SV=2	144.45	62.1	67.9	125.5	1	0.429907	0.470059	0.868813
Q9NZV1	Cysteine-rich motor neuron 1 protein OS=Homo sapiens GN=CRIM1 PE=1 SV=1	102.9	121.15	78.85	97.1	1	1.17736	0.766278	0.943635
Q9NZZ3	Charged multivesicular body protein 5 OS=Homo sapiens GN=CHMP5 PE=1 SV=1	130.25	78.75	105.1	85.95	1	0.604607	0.80691	0.659885
Q9P121	Neurotrimin OS=Homo sapiens GN=NTM PE=1 SV=1	146.9	73.9	71.45	107.75	1	0.503063	0.486385	0.733492
Q9UBC9	Small proline-rich protein 3 OS=Homo sapiens GN=SPRR3 PE=1 SV=2	100.2	56.6	61.85	181.35	1	0.56487	0.617265	1.80988
Q9UBG3	Cornulin OS=Homo sapiens GN=CRNN PE=1 SV=1	141.15	66	89.85	103	1	0.467588	0.636557	0.72972
Q9UBR2	Cathepsin Z OS=Homo sapiens GN=CTSZ PE=1 SV=1	71.2	128.3	79.45	121.05	1	1.80197	1.11587	1.70014
Q9UBX1	Cathepsin F OS=Homo sapiens GN=CTSF PE=1 SV=1	124.15	72.85	70	132.95	1	0.58679	0.563834	1.07088
Q9UBX7	Kallikrein-11 OS=Homo sapiens GN=KLK11 PE=1 SV=2	76.7	125.05	94.15	104.1	1	1.63038	1.22751	1.35724
Q9UGM5	Fetuin-B OS=Homo sapiens GN=FETUB PE=1 SV=2	85.4	105.9	100.95	107.7	1	1.24005	1.18208	1.26112
Q9UGT4	Sushi domain-containing protein 2 OS=Homo sapiens GN=SUSD2 PE=1 SV=1	142.55	90.4	78.9	88.1	1	0.634163	0.55349	0.618029
Q9UHI8	A disintegrin and metalloproteinase with thrombospondin motifs 1 OS=Homo sapiens GN=ADAMTS1 PE=1 SV=4	74.5	105.15	131.65	88.7	1	1.41141	1.76711	1.1906
Q9UIB8	SLAM family member 5 OS=Homo sapiens GN=CD84 PE=1 SV=1	143.85	72.6	75.45	108.05	1	0.504692	0.524505	0.75113
Q9UKR3	Kallikrein-13 OS=Homo sapiens GN=KLK13 PE=1 SV=1	175.15	69.3	71.1	84.4	1	0.395661	0.405938	0.481873
Q9UKU9	Angiopoietin-related protein 2 OS=Homo sapiens GN=ANGPTL2 PE=2 SV=1	119.75	66.8	67.45	146	1	0.557829	0.563257	1.21921
Q9UKY0	Prion-like protein doppel OS=Homo sapiens GN=PRND PE=1 SV=2	169.3	43.9	37.15	149.65	1	0.259303	0.219433	0.883934
Q9ULI3	Protein HEG homolog 1 OS=Homo sapiens GN=HEG1 PE=1 SV=3	180.35	66.45	67.15	86.05	1	0.36845	0.372332	0.477128
Q9UM22	Mammalian ependymin-related protein 1 OS=Homo sapiens GN=EPDR1 PE=1 SV=2	91.25	109.95	104.35	94.45	1	1.20493	1.14356	1.03507
Q9UM47	Neurogenic locus notch homolog protein 3 OS=Homo sapiens GN=NOTCH3 PE=1 SV=2	77.25	129.35	112.15	81.3	1	1.67443	1.45178	1.05243
Q9UNN8	Endothelial protein C receptor OS=Homo sapiens GN=PROCR PE=1 SV=1	154.4	79.7	84.6	81.3	1	0.516192	0.547927	0.526554
Q9UNW1	Multiple inositol polyphosphate phosphatase 1 OS=Homo sapiens GN=MINPP1 PE=1 SV=1	102.05	92.2	107.95	97.85	1	0.903479	1.05781	0.958844
Q9UNZ2	NSFL1 cofactor p47 OS=Homo sapiens GN=NSFL1C PE=1 SV=2	119.75	125.8	75.35	79.1	1	1.05052	0.629228	0.660543
Q9UP38	Frizzled-1 OS=Homo sapiens GN=FZD1 PE=1 SV=2	74.15	95.85	111.5	118.55	1	1.29265	1.50371	1.59879
Q9Y279	V-set and immunoglobulin domain-containing protein 4 OS=Homo sapiens GN=VSIG4 PE=1 SV=1	100.1	99.25	118.45	82.2	1	0.991508	1.18332	0.821179
Q9Y2E5	Epididymis-specific alpha-mannosidase OS=Homo sapiens GN=MAN2B2 PE=1 SV=4	122.35	94.8	72.25	110.55	1	0.774826	0.590519	0.903555
Q9Y3B3	Transmembrane emp24 domain-containing protein 7 OS=Homo sapiens GN=TMED7 PE=1 SV=2	76.6	136.8	107.75	78.85	1	1.7859	1.40666	1.02937
Q9Y490	Talin-1 OS=Homo sapiens GN=TLN1 PE=1 SV=3	67.2	130.3	139.55	63	1	1.93899	2.07664	0.9375
Q9Y4L1	Hypoxia up-regulated protein 1 OS=Homo sapiens GN=HYOU1 PE=1 SV=1	116.3	75.65	85.4	122.6	1	0.650473	0.734308	1.05417
Q9Y561	Low-density lipoprotein receptor-related protein 12 OS=Homo sapiens GN=LRP12 PE=1 SV=1	91.1	105.95	111.35	91.6	1	1.16301	1.22228	1.00549
Q9Y5Y7	Lymphatic vessel endothelial hyaluronic acid receptor 1 OS=Homo sapiens GN=LYVE1 PE=1 SV=2	86.65	98.1	104.05	111.15	1	1.13214	1.20081	1.28275
Q9Y5Z4	Heme-binding protein 2 OS=Homo sapiens GN=HEBP2 PE=1 SV=1	128.65	96.55	85.35	89.45	1	0.750486	0.663428	0.695297
Q9Y624	Junctional adhesion molecule A OS=Homo sapiens GN=F11R PE=1 SV=1	133.3	82.2	83.75	100.8	1	0.616654	0.628282	0.756189
Q9Y639	Neuroplastin OS=Homo sapiens GN=NPTN PE=1 SV=2	154.1	69.75	78.9	97.2	1	0.452628	0.512005	0.630759
Q9Y646	Carboxypeptidase Q OS=Homo sapiens GN=CPQ PE=1 SV=1	103.65	112.95	78	105.45	1	1.08973	0.752533	1.01737
Q9Y653	G-protein coupled receptor 56 OS=Homo sapiens GN=GPR56 PE=1 SV=2	149.4	77.2	71.75	101.7	1	0.516734	0.480254	0.680723
Q9Y6Q6	Tumor necrosis factor receptor superfamily member 11A OS=Homo sapiens GN=TNFRSF11A PE=1 SV=1	88.3	141	89.5	81.15	1	1.59683	1.01359	0.919026
Q9Y6R7	IgGFc-binding protein OS=Homo sapiens GN=FCGBP PE=1 SV=3	58.35	195.9	80.4	65.25	1	3.35733	1.37789	1.11825

## Sheet: Run 1
Accession	Description	# Peptides	# PSMs	# Unique Peptides	MW [kDa]	Abundance Ratio: (115) / (114)	Abundance Ratio: (116) / (114)	Abundance Ratio: (117) / (114)	Abundance Ratio (log2): (115) / (114)	Abundance Ratio (log2): (116) / (114)	Abundance Ratio (log2): (117) / (114)	Abundances (Grouped): 114	Abundances (Grouped): 115	Abundances (Grouped): 116	Abundances (Grouped): 117	emPAI	Score Sequest HT	# Peptides Sequest HT
P02768	Serum albumin OS=Homo sapiens GN=ALB PE=1 SV=2	76	2715	76	69.321	1.088	1.484	0.857	0.12	0.57	-0.22	90.3	98.2	134.1	77.4	464158	9132.2	76
P35555	Fibrillin-1 OS=Homo sapiens GN=FBN1 PE=1 SV=3	60	215	60	312.022	1.598	1.132	1.189	0.68	0.18	0.25	81.3	129.9	92.1	96.7	3.173	615.365	60
P98160	Basement membrane-specific heparan sulfate proteoglycan core protein OS=Homo sapiens GN=HSPG2 PE=1 SV=4	60	228	60	468.532	0.731	0.663	0.94	-0.45	-0.59	-0.09	120	87.7	79.6	112.8	2.232	799.811	60
P02751	Fibronectin OS=Homo sapiens GN=FN1 PE=1 SV=4	51	203	51	262.46	2.377	1.451	1.199	1.25	0.54	0.26	66.4	157.8	96.3	79.6	6.796	655.924	51
P02787	Serotransferrin OS=Homo sapiens GN=TF PE=1 SV=3	47	370	47	77.014	0.66	0.939	1.231	-0.6	-0.09	0.3	104.5	68.9	98.1	128.6	734.642	1299.78	47
P22105	Tenascin-X OS=Homo sapiens GN=TNXB PE=1 SV=3	45	80	45	464.034	1.134	0.888	0.902	0.18	-0.17	-0.15	101.9	115.6	90.6	91.9	0.874	266.231	45
P00450	Ceruloplasmin OS=Homo sapiens GN=CP PE=1 SV=1	45	491	45	122.128	1.102	0.719	2.164	0.14	-0.48	1.11	80.2	88.4	57.7	173.7	230.013	1637.3	45
P02788	Lactotransferrin OS=Homo sapiens GN=LTF PE=1 SV=6	43	264	43	78.132	2.365	0.55	0.878	1.24	-0.86	-0.19	83.5	197.4	45.9	73.3	109.069	840.878	43
Q9Y6R7	IgGFc-binding protein OS=Homo sapiens GN=FCGBP PE=1 SV=3	39	83	39	571.639	3.619	1.425	1.15	1.86	0.51	0.2	55.6	201.2	79.2	63.9	0.982	245.242	39
P08603	Complement factor H OS=Homo sapiens GN=CFH PE=1 SV=4	43	156	38	139.005	1.171	2.451	0.764	0.23	1.29	-0.39	74.3	87	182	56.7	16.635	459.75	43
P00747	Plasminogen OS=Homo sapiens GN=PLG PE=1 SV=2	38	105	38	90.51	1.205	1.732	1.592	0.27	0.79	0.67	72.3	87.1	125.3	115.2	20.21	336.486	38
P43652	Afamin OS=Homo sapiens GN=AFM PE=1 SV=1	37	460	37	69.024	1.304	1.86	1.949	0.38	0.9	0.96	65.4	85.3	121.7	127.5	282.388	1348.87	37
O43451	Maltase-glucoamylase, intestinal OS=Homo sapiens GN=MGAM PE=1 SV=5	36	162	36	209.72	0.749	0.565	1.196	-0.42	-0.82	0.26	114	85.3	64.4	136.4	6.406	487.847	36
P02774	Vitamin D-binding protein OS=Homo sapiens GN=GC PE=1 SV=1	35	335	35	52.929	2.577	3.703	1.47	1.37	1.89	0.56	45.7	117.8	169.3	67.2	922.671	1132.61	35
O60494	Cubilin OS=Homo sapiens GN=CUBN PE=1 SV=5	35	85	35	398.48	0.691	0.699	0.824	-0.53	-0.52	-0.28	124.4	86	87	102.5	1.278	261.98	35
O75882	Attractin OS=Homo sapiens GN=ATRN PE=1 SV=2	31	139	31	158.432	0.668	0.735	0.894	-0.58	-0.44	-0.16	121.3	81	89.2	108.4	7.859	442.708	31
P01024	Complement C3 OS=Homo sapiens GN=C3 PE=1 SV=2	31	62	31	187.03	1.7	3.024	0.952	0.77	1.6	-0.07	59.9	101.9	181.2	57	1.48	197.314	31
P0C0L4	Complement C4-A OS=Homo sapiens GN=C4A PE=1 SV=1	30	75	30	192.65	1.342	4.011	0.754	0.42	2	-0.41	56.3	75.5	225.7	42.5	1.873	235.378	30
P04040	Catalase OS=Homo sapiens GN=CAT PE=1 SV=3	29	118	29	59.719	0.373	0.207	0.208	-1.42	-2.27	-2.26	223.7	83.4	46.4	46.6	56.224	391.937	29
P01042	Kininogen-1 OS=Homo sapiens GN=KNG1 PE=1 SV=2	29	442	29	71.912	0.371	0.319	0.543	-1.43	-1.65	-0.88	179.1	66.4	57.2	97.3	105.082	1288.52	29
P25311	Zinc-alpha-2-glycoprotein OS=Homo sapiens GN=AZGP1 PE=1 SV=2	28	994	28	34.237	1.043	0.608	1.623	0.06	-0.72	0.7	93.6	97.6	56.9	151.9	206913	2999.45	28
P01008	Antithrombin-III OS=Homo sapiens GN=SERPINC1 PE=1 SV=1	28	194	28	52.569	1.746	2.714	0.825	0.8	1.44	-0.28	63.6	111.1	172.7	52.5	198.526	642.497	28
P98164	Low-density lipoprotein receptor-related protein 2 OS=Homo sapiens GN=LRP2 PE=1 SV=3	26	47	26	521.616	0.882	0.916	0.95	-0.18	-0.13	-0.07	106.7	94.1	97.8	101.4	0.419	149.464	26
Q92896	Golgi apparatus protein 1 OS=Homo sapiens GN=GLG1 PE=1 SV=2	26	35	26	134.464	0.721	0.538	0.713	-0.47	-0.89	-0.49	134.6	97.1	72.4	95.9	1.733	108.395	26
P07911	Uromodulin OS=Homo sapiens GN=UMOD PE=1 SV=1	25	471	25	69.714	0.654	0.491	0.665	-0.61	-1.03	-0.59	142.3	93.1	69.8	94.7	106.007	1445.94	25
P24821	Tenascin OS=Homo sapiens GN=TNC PE=1 SV=3	25	66	25	240.7	1.661	1.136	0.934	0.73	0.18	-0.1	84.6	140.4	96.1	78.9	1.492	187.985	25
P04264	Keratin, type II cytoskeletal 1 OS=Homo sapiens GN=KRT1 PE=1 SV=6	30	121	24	65.999	1.821	2.581	1.104	0.86	1.37	0.14	61.5	112	158.7	67.9	32.598	424.238	30
P04279	Semenogelin-1 OS=Homo sapiens GN=SEMG1 PE=1 SV=2	28	158	24	52.1	0.528	0.275	0.775	-0.92	-1.86	-0.37	155.2	82	42.7	120.2	113.062	512.806	28
Q99715	Collagen alpha-1(XII) chain OS=Homo sapiens GN=COL12A1 PE=1 SV=2	24	59	24	332.941	1.105	0.816	0.921	0.14	-0.29	-0.12	104.1	115.1	85	95.8	0.712	181.599	24
Q14624	Inter-alpha-trypsin inhibitor heavy chain H4 OS=Homo sapiens GN=ITIH4 PE=1 SV=4	24	69	24	103.293	1.143	1.713	0.73	0.19	0.78	-0.45	87.2	99.7	149.4	63.6	5.607	229.6	24
O00468	Agrin OS=Homo sapiens GN=AGRN PE=1 SV=4	24	47	24	214.706	1.323	1.437	0.989	0.4	0.52	-0.02	84.2	111.4	121	83.3	1.139	176.833	24
P01133	Pro-epidermal growth factor OS=Homo sapiens GN=EGF PE=1 SV=2	23	66	23	133.906	0.619	0.421	0.673	-0.69	-1.25	-0.57	147.5	91.3	62	99.2	2.275	227.251	23
P02760	Protein AMBP OS=Homo sapiens GN=AMBP PE=1 SV=1	23	1500	23	38.974	1.588	2.151	1.336	0.67	1.11	0.42	65.8	104.6	141.7	87.9	408423	4092.22	23
Q02383	Semenogelin-2 OS=Homo sapiens GN=SEMG2 PE=1 SV=1	27	178	23	65.405	0.591	0.353	0.797	-0.76	-1.5	-0.33	145.9	86.3	51.5	116.3	40.596	472.586	27
P35908	Keratin, type II cytoskeletal 2 epidermal OS=Homo sapiens GN=KRT2 PE=1 SV=2	29	80	22	65.393	2.055	2.701	0.874	1.04	1.43	-0.19	60.3	124	162.9	52.7	12.789	278.655	29
P01833	Polymeric immunoglobulin receptor OS=Homo sapiens GN=PIGR PE=1 SV=4	22	154	22	83.232	0.689	0.825	0.989	-0.54	-0.28	-0.02	114.2	78.7	94.2	112.9	12.183	524.32	22
P05164	Myeloperoxidase OS=Homo sapiens GN=MPO PE=1 SV=1	21	59	21	83.815	1.465	0.483	0.48	0.55	-1.05	-1.06	116.7	170.9	56.3	56.1	5.251	172.179	21
P02790	Hemopexin OS=Homo sapiens GN=HPX PE=1 SV=2	21	235	21	51.643	1.362	1.927	1.301	0.45	0.95	0.38	71.6	97.5	137.9	93.1	99	809.088	21
Q12860	Contactin-1 OS=Homo sapiens GN=CNTN1 PE=1 SV=1	21	30	21	113.249	0.69	0.706	0.713	-0.54	-0.5	-0.49	128.7	88.8	90.8	91.8	1.531	90.7858	21
P21333	Filamin-A OS=Homo sapiens GN=FLNA PE=1 SV=4	21	53	21	280.564	1.249	0.81	0.935	0.32	-0.3	-0.1	100.2	125.1	81.1	93.6	0.725	167.157	21
P01009	Alpha-1-antitrypsin OS=Homo sapiens GN=SERPINA1 PE=1 SV=3	21	161	21	46.707	0.988	1.319	1.194	-0.02	0.4	0.26	88.9	87.8	117.2	106.1	139.653	529.388	21
P10253	Lysosomal alpha-glucosidase OS=Homo sapiens GN=GAA PE=1 SV=4	21	174	21	105.257	0.544	0.461	0.77	-0.88	-1.12	-0.38	144.1	78.4	66.4	111	21.758	548.213	21
Q9BXP8	Pappalysin-2 OS=Homo sapiens GN=PAPPA2 PE=1 SV=4	20	61	20	198.411	0.894	1.246	0.598	-0.16	0.32	-0.74	107	95.6	133.3	64	1.976	193.456	20
P07602	Proactivator polypeptide OS=Homo sapiens GN=PSAP PE=1 SV=2	20	218	20	58.074	1.559	1.012	1.452	0.64	0.02	0.54	79.6	124.2	80.6	115.7	28.552	579.919	20
P00734	Prothrombin OS=Homo sapiens GN=F2 PE=1 SV=2	20	193	20	69.992	1.001	1.093	0.968	0	0.13	-0.05	98.5	98.6	107.6	95.4	31.68	682.863	20
Q6W4X9	Mucin-6 OS=Homo sapiens GN=MUC6 PE=1 SV=3	19	43	19	256.887	1.971	0.848	1.791	0.98	-0.24	0.84	71.3	140.5	60.5	127.7	1.404	146.088	19
P08174	Complement decay-accelerating factor OS=Homo sapiens GN=CD55 PE=1 SV=4	19	171	19	41.374	1.25	1.338	1.133	0.32	0.42	0.18	84.7	105.9	113.4	96	62.096	458.224	19
P13645	Keratin, type I cytoskeletal 10 OS=Homo sapiens GN=KRT10 PE=1 SV=6	24	93	19	58.792	1.82	2.571	1.041	0.86	1.36	0.06	62.2	113.2	159.9	64.7	39.471	317.296	24
P12109	Collagen alpha-1(VI) chain OS=Homo sapiens GN=COL6A1 PE=1 SV=3	18	65	18	108.462	0.296	0.299	0.456	-1.75	-1.74	-1.13	195	57.8	58.3	88.9	2.475	225.7	18
Q9HC84	Mucin-5B OS=Homo sapiens GN=MUC5B PE=1 SV=3	19	38	18	595.96	1.517	0.613	0.466	0.6	-0.71	-1.1	111.2	168.8	68.2	51.8	0.363	115.936	19
P00738	Haptoglobin OS=Homo sapiens GN=HP PE=1 SV=1	18	60	18	45.177	0.713	1.231	0.834	-0.49	0.3	-0.26	105.9	75.5	130.3	88.3	21.275	185.132	18
P00751	Complement factor B OS=Homo sapiens GN=CFB PE=1 SV=2	18	88	18	85.479	1.605	3.055	1.025	0.68	1.61	0.04	59.8	96	182.8	61.3	5.749	264.436	18
P10909	Clusterin OS=Homo sapiens GN=CLU PE=1 SV=1	17	66	17	52.461	1.111	1.391	0.996	0.15	0.48	-0.01	88.9	98.8	123.7	88.6	35.747	234.787	17
P02671	Fibrinogen alpha chain OS=Homo sapiens GN=FGA PE=1 SV=2	18	55	17	94.914	0.889	2.193	0.722	-0.17	1.13	-0.47	83.3	74	182.6	60.1	3.962	161.493	18
P01023	Alpha-2-macroglobulin OS=Homo sapiens GN=A2M PE=1 SV=3	19	28	17	163.188	1.24	1.819	0.588	0.31	0.86	-0.77	86.1	106.8	156.6	50.6	0.855	91.5785	19
P35527	Keratin, type I cytoskeletal 9 OS=Homo sapiens GN=KRT9 PE=1 SV=3	18	65	17	62.027	2.227	3.187	0.877	1.16	1.67	-0.19	54.9	122.2	174.8	48.1	9.701	222.035	18
Q12805	EGF-containing fibulin-like extracellular matrix protein 1 OS=Homo sapiens GN=EFEMP1 PE=1 SV=2	16	82	16	54.604	1.182	1.828	0.804	0.24	0.87	-0.31	83.1	98.2	151.9	66.8	27.943	260.6	16
Q8NBJ4	Golgi membrane protein 1 OS=Homo sapiens GN=GOLM1 PE=1 SV=1	16	42	16	45.306	0.257	0.234	0.652	-1.96	-2.1	-0.62	186.6	48	43.7	121.7	6.943	158.25	16
P10643	Complement component C7 OS=Homo sapiens GN=C7 PE=1 SV=2	16	58	16	93.457	1.543	1.641	1.219	0.63	0.71	0.29	74	114.2	121.5	90.3	3.942	191.056	16
Q13228	Selenium-binding protein 1 OS=Homo sapiens GN=SELENBP1 PE=1 SV=2	16	42	16	52.358	0.827	0.495	0.698	-0.27	-1.01	-0.52	132.5	109.5	65.6	92.5	7.003	147.296	16
P06396	Gelsolin OS=Homo sapiens GN=GSN PE=1 SV=1	16	62	16	85.644	0.321	0.352	0.579	-1.64	-1.51	-0.79	177.6	57	62.5	102.9	2.639	218.322	16
P19013	Keratin, type II cytoskeletal 4 OS=Homo sapiens GN=KRT4 PE=1 SV=4	18	28	16	57.25	0.64	0.555	0.935	-0.64	-0.85	-0.1	127.8	81.8	70.9	119.5	3.037	83.7214	18
P00749	Urokinase-type plasminogen activator OS=Homo sapiens GN=PLAU PE=1 SV=2	16	59	16	48.476	0.419	0.349	0.681	-1.26	-1.52	-0.55	163.4	68.4	57	111.2	33.551	192.174	16
Q16270	Insulin-like growth factor-binding protein 7 OS=Homo sapiens GN=IGFBP7 PE=1 SV=1	16	200	16	29.111	1.137	0.478	0.873	0.18	-1.07	-0.2	114.7	130.4	54.8	100.2	337.386	748.794	16
P19835	Bile salt-activated lipase OS=Homo sapiens GN=CEL PE=1 SV=3	15	48	15	79.272	0.643	0.379	1.071	-0.64	-1.4	0.1	129.3	83.1	49	138.6	13.065	145.015	15
P13646	Keratin, type I cytoskeletal 13 OS=Homo sapiens GN=KRT13 PE=1 SV=4	21	68	15	49.557	0.471	0.541	1.146	-1.09	-0.89	0.2	126.7	59.6	68.6	145.1	12.335	222.845	21
Q04756	Hepatocyte growth factor activator OS=Homo sapiens GN=HGFAC PE=1 SV=1	15	37	15	70.636	1.127	1.745	1.307	0.17	0.8	0.39	77.2	87	134.8	101	3.037	114.244	15
P50895	Basal cell adhesion molecule OS=Homo sapiens GN=BCAM PE=1 SV=2	15	24	15	67.363	0.454	0.428	0.786	-1.14	-1.22	-0.35	149.9	68	64.2	117.8	2.36	84.2155	15
Q14515	SPARC-like protein 1 OS=Homo sapiens GN=SPARCL1 PE=1 SV=2	15	52	15	75.161	0.552	0.592	1.29	-0.86	-0.76	0.37	116.5	64.3	69	150.2	4.456	177.187	15
P01011	Alpha-1-antichymotrypsin OS=Homo sapiens GN=SERPINA3 PE=1 SV=2	15	82	15	47.621	0.752	1.448	1.197	-0.41	0.53	0.26	91	68.5	131.7	108.9	18.573	276.432	15
P04217	Alpha-1B-glycoprotein OS=Homo sapiens GN=A1BG PE=1 SV=4	15	429	15	54.22	0.558	0.877	1.474	-0.84	-0.19	0.56	102.3	57.1	89.7	150.9	371.759	1497.4	15
P02749	Beta-2-glycoprotein 1 OS=Homo sapiens GN=APOH PE=1 SV=3	14	117	14	38.273	0.969	2.096	0.902	-0.05	1.07	-0.15	80.5	78	168.8	72.7	87.587	387.762	14
P23142	Fibulin-1 OS=Homo sapiens GN=FBLN1 PE=1 SV=4	14	62	14	77.162	2.071	1.662	1.152	1.05	0.73	0.2	68	140.8	113	78.3	5.543	198.356	14
P19320	Vascular cell adhesion protein 1 OS=Homo sapiens GN=VCAM1 PE=1 SV=1	14	72	14	81.224	1.155	2.745	1.431	0.21	1.46	0.52	63.2	73	173.4	90.4	4.623	239.003	14
P55287	Cadherin-11 OS=Homo sapiens GN=CDH11 PE=1 SV=2	14	30	14	87.911	0.315	0.337	0.59	-1.67	-1.57	-0.76	178.4	56.2	60.2	105.2	2.529	93.1205	14
P55290	Cadherin-13 OS=Homo sapiens GN=CDH13 PE=1 SV=1	14	70	14	78.238	0.429	0.43	1.017	-1.22	-1.22	0.02	139.1	59.7	59.8	141.4	4.908	225.408	14
P07339	Cathepsin D OS=Homo sapiens GN=CTSD PE=1 SV=1	14	92	14	44.524	1.339	1.072	1.05	0.42	0.1	0.07	89.7	120.1	96.2	94.1	35.747	258.367	14
P10451	Osteopontin OS=Homo sapiens GN=SPP1 PE=1 SV=1	14	179	14	35.401	0.221	0.301	0.395	-2.18	-1.73	-1.34	208.6	46.1	62.9	82.4	46414.9	447.579	14
Q9ULI3	Protein HEG homolog 1 OS=Homo sapiens GN=HEG1 PE=1 SV=3	14	35	14	147.369	0.409	0.422	0.482	-1.29	-1.24	-1.05	172.9	70.8	73	83.3	1.106	116.523	14
Q02818	Nucleobindin-1 OS=Homo sapiens GN=NUCB1 PE=1 SV=4	14	17	14	53.846	0.361	0.381	0.89	-1.47	-1.39	-0.17	152	54.9	57.9	135.3	2.162	60.197	14
P54802	Alpha-N-acetylglucosaminidase OS=Homo sapiens GN=NAGLU PE=1 SV=2	14	39	14	82.214	0.537	0.487	0.771	-0.9	-1.04	-0.38	143.1	76.9	69.7	110.3	2.35	132.897	14
P02679	Fibrinogen gamma chain OS=Homo sapiens GN=FGG PE=1 SV=3	14	28	14	51.479	1.095	3.957	0.875	0.13	1.98	-0.19	57.7	63.2	228.5	50.5	3.52	80.7928	14
P19022	Cadherin-2 OS=Homo sapiens GN=CDH2 PE=1 SV=4	14	64	14	99.747	0.825	0.57	0.733	-0.28	-0.81	-0.45	127.9	105.5	72.8	93.8	6.017	204.249	14
Q16610	Extracellular matrix protein 1 OS=Homo sapiens GN=ECM1 PE=1 SV=2	14	37	14	60.635	3.154	1.687	2.03	1.66	0.75	1.02	50.8	160.3	85.7	103.2	3.437	113.13	14
P15586	N-acetylglucosamine-6-sulfatase OS=Homo sapiens GN=GNS PE=1 SV=3	14	109	14	62.042	0.765	0.44	1.467	-0.39	-1.18	0.55	108.9	83.3	47.9	159.8	18.953	375.018	14
P12830	Cadherin-1 OS=Homo sapiens GN=CDH1 PE=1 SV=3	15	78	14	97.396	0.888	1.04	0.977	-0.17	0.06	-0.03	102.4	90.9	106.6	100.1	5.952	242.138	15
Q01459	Di-N-acetylchitobiase OS=Homo sapiens GN=CTBS PE=1 SV=1	13	122	13	43.732	1.147	1.014	0.982	0.2	0.02	-0.03	96.6	110.7	97.9	94.8	79.309	381.373	13
P08236	Beta-glucuronidase OS=Homo sapiens GN=GUSB PE=1 SV=2	13	38	13	74.685	0.704	0.437	0.869	-0.51	-1.19	-0.2	132.9	93.6	58.1	115.4	2.875	111.182	13
P11142	Heat shock cognate 71 kDa protein OS=Homo sapiens GN=HSPA8 PE=1 SV=1	17	24	13	70.854	0.737	0.617	0.73	-0.44	-0.7	-0.45	129.7	95.6	80	94.7	2.888	76.1488	17
P26927	Hepatocyte growth factor-like protein OS=Homo sapiens GN=MST1 PE=1 SV=2	13	24	13	80.268	0.919	1.05	0.981	-0.12	0.07	-0.03	101.2	93.1	106.3	99.3	1.834	80.3842	13
P05156	Complement factor I OS=Homo sapiens GN=CFI PE=1 SV=2	13	48	13	65.707	0.954	1.597	0.639	-0.07	0.68	-0.65	95.5	91	152.5	61	6.197	166.557	13
P14384	Carboxypeptidase M OS=Homo sapiens GN=CPM PE=1 SV=2	13	51	13	50.481	0.388	0.339	0.878	-1.37	-1.56	-0.19	153.5	59.5	52.1	134.9	12.043	152.267	13
Q02487	Desmocollin-2 OS=Homo sapiens GN=DSC2 PE=1 SV=1	13	33	13	99.899	0.659	0.798	0.731	-0.6	-0.33	-0.45	125.5	82.7	100.1	91.8	2.467	113.472	13
P11717	Cation-independent mannose-6-phosphate receptor OS=Homo sapiens GN=IGF2R PE=1 SV=3	13	18	13	274.199	1.295	1.452	0.904	0.37	0.54	-0.14	86	111.3	124.9	77.8	0.289	55.1095	13
Q08380	Galectin-3-binding protein OS=Homo sapiens GN=LGALS3BP PE=1 SV=1	12	54	12	65.289	1.006	1.012	1.086	0.01	0.02	0.12	97.5	98	98.6	105.9	5.136	197.695	12
Q12907	Vesicular integral-membrane protein VIP36 OS=Homo sapiens GN=LMAN2 PE=1 SV=1	12	59	12	40.203	0.354	0.364	0.98	-1.5	-1.46	-0.03	148.2	52.5	54	145.3	16.302	195.938	12
Q9NZV1	Cysteine-rich motor neuron 1 protein OS=Homo sapiens GN=CRIM1 PE=1 SV=1	12	19	12	113.66	1.181	0.749	0.89	0.24	-0.42	-0.17	104.7	123.7	78.4	93.2	1.089	54.7226	12
Q14767	Latent-transforming growth factor beta-binding protein 2 OS=Homo sapiens GN=LTBP2 PE=1 SV=3	12	29	12	194.923	1.565	1.106	1.504	0.65	0.15	0.59	77.3	121	85.5	116.3	0.618	136.153	12
P13591	Neural cell adhesion molecule 1 OS=Homo sapiens GN=NCAM1 PE=1 SV=3	12	28	12	94.515	0.98	0.96	0.801	-0.03	-0.06	-0.32	106.9	104.8	102.6	85.7	1.798	84.1355	12
Q9Y2E5	Epididymis-specific alpha-mannosidase OS=Homo sapiens GN=MAN2B2 PE=1 SV=4	12	31	12	113.908	0.794	0.605	0.886	-0.33	-0.73	-0.17	121.8	96.7	73.6	107.9	1.783	98.3906	12
P28799	Granulins OS=Homo sapiens GN=GRN PE=1 SV=2	12	35	12	63.5	1.589	1.015	1.154	0.67	0.02	0.21	84.1	133.6	85.3	97	5.105	103.886	12
Q9HAT2	Sialate O-acetylesterase OS=Homo sapiens GN=SIAE PE=1 SV=1	12	40	12	58.277	0.503	0.472	1.06	-0.99	-1.08	0.08	131.8	66.3	62.2	139.6	4.623	111.128	12
P49747	Cartilage oligomeric matrix protein OS=Homo sapiens GN=COMP PE=1 SV=2	14	41	12	82.808	1.622	1.056	1.347	0.7	0.08	0.43	79.6	129.1	84	107.2	4.712	118.302	14
P11047	Laminin subunit gamma-1 OS=Homo sapiens GN=LAMC1 PE=1 SV=3	12	17	12	177.489	1.574	0.824	1.03	0.65	-0.28	0.04	90.3	142.2	74.4	93	0.501	53.7282	12
A8K2U0	Alpha-2-macroglobulin-like protein 1 OS=Homo sapiens GN=A2ML1 PE=1 SV=3	12	16	12	161.004	2.188	0.829	1.006	1.13	-0.27	0.01	79.6	174.3	66	80.1	0.546	50.9319	12
P05067	Amyloid beta A4 protein OS=Homo sapiens GN=APP PE=1 SV=3	13	44	12	86.888	1.134	0.778	1.067	0.18	-0.36	0.09	100.5	114	78.2	107.3	2.427	166.14	13
Q14766	Latent-transforming growth factor beta-binding protein 1 OS=Homo sapiens GN=LTBP1 PE=1 SV=4	12	32	12	186.673	1.591	1.146	0.972	0.67	0.2	-0.04	84.9	135.1	97.4	82.6	0.73	110.914	12
P16278	Beta-galactosidase OS=Homo sapiens GN=GLB1 PE=1 SV=2	13	65	12	76.027	0.822	0.591	1.175	-0.28	-0.76	0.23	111.5	91.6	65.9	131	6.88	213.6	13
Q13332	Receptor-type tyrosine-protein phosphatase S OS=Homo sapiens GN=PTPRS PE=1 SV=3	13	30	12	216.905	1.451	1.465	0.927	0.54	0.55	-0.11	82.6	119.9	121	76.5	0.749	92.6203	13
Q9HCU0	Endosialin OS=Homo sapiens GN=CD248 PE=1 SV=1	12	42	12	80.807	0.997	0.722	0.873	0	-0.47	-0.2	111.4	111	80.4	97.2	2.875	134.231	12
P19823	Inter-alpha-trypsin inhibitor heavy chain H2 OS=Homo sapiens GN=ITIH2 PE=1 SV=2	11	19	11	106.397	1.602	1.785	1.061	0.68	0.84	0.09	73.4	117.6	131.1	77.9	0.833	51.7304	11
Q8NFZ8	Cell adhesion molecule 4 OS=Homo sapiens GN=CADM4 PE=1 SV=1	11	50	11	42.759	0.436	0.379	0.765	-1.2	-1.4	-0.39	155.1	67.6	58.7	118.6	24.809	147.086	11
P05452	Tetranectin OS=Homo sapiens GN=CLEC3B PE=1 SV=3	11	41	11	22.522	0.494	0.555	0.624	-1.02	-0.85	-0.68	149.6	74	83	93.4	55.234	142.125	11
P05543	Thyroxine-binding globulin OS=Homo sapiens GN=SERPINA7 PE=1 SV=2	11	41	11	46.295	0.896	0.965	0.955	-0.16	-0.05	-0.07	104.8	93.9	101.2	100.1	11.115	125.945	11
Q92820	Gamma-glutamyl hydrolase OS=Homo sapiens GN=GGH PE=1 SV=2	11	59	11	35.941	0.733	0.535	0.979	-0.45	-0.9	-0.03	123.2	90.3	65.9	120.6	15.238	195.075	11
O43278	Kunitz-type protease inhibitor 1 OS=Homo sapiens GN=SPINT1 PE=1 SV=2	11	25	11	58.36	1.018	1.057	0.849	0.03	0.08	-0.24	101.9	103.8	107.7	86.6	3.394	79.97	11
Q9BYE9	Cadherin-related family member 2 OS=Homo sapiens GN=CDHR2 PE=1 SV=2	11	28	11	141.455	0.882	0.784	0.905	-0.18	-0.35	-0.14	112	98.8	87.8	101.4	0.833	103.843	11
P00915	Carbonic anhydrase 1 OS=Homo sapiens GN=CA1 PE=1 SV=2	11	152	11	28.852	0.243	0.313	0.413	-2.04	-1.68	-1.27	203.1	49.4	63.5	84	629.957	362.033	11
P02675	Fibrinogen beta chain OS=Homo sapiens GN=FGB PE=1 SV=2	11	29	11	55.892	1.073	3.085	0.794	0.1	1.63	-0.33	67.2	72.1	207.3	53.4	2.162	91.3278	11
P18065	Insulin-like growth factor-binding protein 2 OS=Homo sapiens GN=IGFBP2 PE=1 SV=2	11	44	11	34.791	0.763	0.671	0.987	-0.39	-0.57	-0.02	116.9	89.2	78.5	115.4	11.328	157.481	11
Q6UXB8	Peptidase inhibitor 16 OS=Homo sapiens GN=PI16 PE=1 SV=1	11	68	11	49.44	0.794	0.758	1.393	-0.33	-0.4	0.48	101.4	80.5	76.9	141.2	38.811	271.442	11
Q9NQ38	Serine protease inhibitor Kazal-type 5 OS=Homo sapiens GN=SPINK5 PE=1 SV=2	11	33	11	120.637	1.357	1.227	1.007	0.44	0.29	0.01	87.1	118.3	106.9	87.7	1.239	87.0217	11
O00584	Ribonuclease T2 OS=Homo sapiens GN=RNASET2 PE=1 SV=2	11	40	11	29.462	1.487	1.175	1.431	0.57	0.23	0.52	78.6	116.8	92.3	112.4	15.238	118.334	11
P02765	Alpha-2-HS-glycoprotein OS=Homo sapiens GN=AHSG PE=1 SV=1	11	104	11	39.3	1.612	2.973	1.257	0.69	1.57	0.33	58.5	94.2	173.8	73.5	26.826	333.799	11
P09603	Macrophage colony-stimulating factor 1 OS=Homo sapiens GN=CSF1 PE=1 SV=2	11	38	11	60.142	0.477	0.506	0.674	-1.07	-0.98	-0.57	150.5	71.8	76.2	101.4	3.786	122.666	11
P05937	Calbindin OS=Homo sapiens GN=CALB1 PE=1 SV=2	11	19	11	30.006	0.633	0.48	1.072	-0.66	-1.06	0.1	125.6	79.5	60.3	134.6	10.548	60.2861	11
P02545	Prelamin-A/C OS=Homo sapiens GN=LMNA PE=1 SV=1	11	13	11	74.095	0.635	0.743	0.726	-0.65	-0.43	-0.46	128.8	81.8	95.8	93.6	0.848	43.1225	11
Q8IUL8	Cartilage intermediate layer protein 2 OS=Homo sapiens GN=CILP2 PE=2 SV=2	11	18	11	126.211	0.243	0.247	0.541	-2.04	-2.02	-0.89	197	47.8	48.7	106.5	0.674	65.5872	11
Q7Z3B1	Neuronal growth regulator 1 OS=Homo sapiens GN=NEGR1 PE=1 SV=3	11	46	11	38.694	0.33	0.359	0.974	-1.6	-1.48	-0.04	150.2	49.5	53.9	146.3	10.548	156.552	11
P07996	Thrombospondin-1 OS=Homo sapiens GN=THBS1 PE=1 SV=2	10	22	10	129.3	1.987	1.095	0.865	0.99	0.13	-0.21	80.9	160.6	88.5	70	0.565	58.6397	10
P14314	Glucosidase 2 subunit beta OS=Homo sapiens GN=PRKCSH PE=1 SV=2	10	13	10	59.388	0.525	0.533	0.642	-0.93	-0.91	-0.64	148.1	77.8	79	95.1	2.899	45.1598	10
P04004	Vitronectin OS=Homo sapiens GN=VTN PE=1 SV=1	10	70	10	54.271	0.98	1.948	0.934	-0.03	0.96	-0.1	82.3	80.7	160.2	76.8	9	220.761	10
P12111	Collagen alpha-3(VI) chain OS=Homo sapiens GN=COL6A3 PE=1 SV=5	10	23	10	343.457	1.172	1.579	0.985	0.23	0.66	-0.02	84.5	99	133.4	83.2	0.155	79.456	10
P13987	CD59 glycoprotein OS=Homo sapiens GN=CD59 PE=1 SV=1	10	388	10	14.168	1.583	0.973	0.989	0.66	-0.04	-0.02	88	139.3	85.6	87	37274.9	1305.19	10
P16870	Carboxypeptidase E OS=Homo sapiens GN=CPE PE=1 SV=1	10	19	10	53.117	0.763	0.674	1.299	-0.39	-0.57	0.38	107	81.7	72.2	139.1	2.282	55.9068	10
Q9UBR2	Cathepsin Z OS=Homo sapiens GN=CTSZ PE=1 SV=1	10	33	10	33.846	1.864	1.019	1.737	0.9	0.03	0.8	71.2	132.7	72.5	123.6	10.548	103.41	10
P43121	Cell surface glycoprotein MUC18 OS=Homo sapiens GN=MCAM PE=1 SV=2	10	35	10	71.563	0.447	0.495	0.675	-1.16	-1.01	-0.57	152.8	68.3	75.7	103.2	2.262	104.563	10
P05109	Protein S100-A8 OS=Homo sapiens GN=S100A8 PE=1 SV=1	10	84	10	10.828	3.77	0.717	0.794	1.91	-0.48	-0.33	63.7	240.1	45.6	50.5	561.341	294.517	10
Q06033	Inter-alpha-trypsin inhibitor heavy chain H3 OS=Homo sapiens GN=ITIH3 PE=1 SV=2	10	19	10	99.787	1.49	3.229	0.914	0.58	1.69	-0.13	60.3	89.8	194.7	55.1	1.192	53.7742	10
P15848	Arylsulfatase B OS=Homo sapiens GN=ARSB PE=1 SV=1	10	24	10	59.649	1.361	1	1.041	0.45	0	0.06	90.9	123.7	90.9	94.6	2.562	75.2749	10
Q13510	Acid ceramidase OS=Homo sapiens GN=ASAH1 PE=1 SV=5	10	35	10	44.631	1.008	1.015	1.519	0.01	0.02	0.6	88.1	88.8	89.4	133.8	5.7	103.644	10
Q8N2S1	Latent-transforming growth factor beta-binding protein 4 OS=Homo sapiens GN=LTBP4 PE=1 SV=2	10	14	10	173.32	1.527	1.355	1.053	0.61	0.44	0.07	81.1	123.7	109.9	85.4	0.367	43.9868	10
Q86TH1	ADAMTS-like protein 2 OS=Homo sapiens GN=ADAMTSL2 PE=1 SV=1	10	18	10	104.553	1.195	0.976	0.835	0.26	-0.04	-0.26	99.9	119.3	97.4	83.4	1.024	50.3399	10
P05154	Plasma serine protease inhibitor OS=Homo sapiens GN=SERPINA5 PE=1 SV=3	10	19	10	45.646	1.008	0.583	0.884	0.01	-0.78	-0.18	115.1	116	67.1	101.8	3.642	64.4572	10
P13647	Keratin, type II cytoskeletal 5 OS=Homo sapiens GN=KRT5 PE=1 SV=3	22	70	10	62.34	1.425	1.772	1.517	0.51	0.83	0.6	70	99.7	124	106.2	18.307	222.788	22
Q92954	Proteoglycan 4 OS=Homo sapiens GN=PRG4 PE=1 SV=2	10	27	10	150.984	1.924	2.559	1.803	0.94	1.36	0.85	54.9	105.6	140.5	99	0.386	75.6984	10
Q12913	Receptor-type tyrosine-protein phosphatase eta OS=Homo sapiens GN=PTPRJ PE=1 SV=3	10	34	10	145.851	1.08	0.907	0.859	0.11	-0.14	-0.22	104	112.3	94.4	89.4	0.84	106.28	10
P08582	Melanotransferrin OS=Homo sapiens GN=MFI2 PE=1 SV=2	10	13	10	80.163	0.694	0.562	0.851	-0.53	-0.83	-0.23	128.7	89.4	72.4	109.5	0.714	41.6677	10
P02748	Complement component C9 OS=Homo sapiens GN=C9 PE=1 SV=2	10	27	10	63.133	1.197	3.172	0.992	0.26	1.67	-0.01	62.9	75.3	199.5	62.4	2.535	91.5598	10
P04196	Histidine-rich glycoprotein OS=Homo sapiens GN=HRG PE=1 SV=1	10	14	10	59.541	1.011	2.138	0.986	0.02	1.1	-0.02	77.9	78.8	166.5	76.8	2.02	46.7132	10
P00441	Superoxide dismutase [Cu-Zn] OS=Homo sapiens GN=SOD1 PE=1 SV=2	10	33	10	15.926	1.581	1.047	1.137	0.66	0.07	0.19	84	132.7	87.9	95.5	81.54	123.652	10
P05362	Intercellular adhesion molecule 1 OS=Homo sapiens GN=ICAM1 PE=1 SV=2	10	24	10	57.789	0.52	0.515	0.899	-0.94	-0.96	-0.15	136.3	70.8	70.3	122.6	2.415	57.5259	10
P32119	Peroxiredoxin-2 OS=Homo sapiens GN=PRDX2 PE=1 SV=5	11	51	10	21.878	0.233	0.223	0.3	-2.1	-2.17	-1.73	227.7	53.2	50.7	68.4	81.54	162.536	11
P27797	Calreticulin OS=Homo sapiens GN=CALR PE=1 SV=1	9	11	9	48.112	0.17	0.338	0.701	-2.56	-1.57	-0.51	181.1	30.8	61.1	127	1.649	38.7412	9
P34059	N-acetylgalactosamine-6-sulfatase OS=Homo sapiens GN=GALNS PE=1 SV=1	10	19	9	57.989	0.531	0.435	1.27	-0.91	-1.2	0.34	123.6	65.7	53.8	156.9	1.807	55.0971	10
Q9BRK3	Matrix-remodeling-associated protein 8 OS=Homo sapiens GN=MXRA8 PE=1 SV=1	9	16	9	49.101	0.219	0.28	0.433	-2.19	-1.84	-1.21	207.1	45.3	57.9	89.7	1.471	55.4003	9
P10619	Lysosomal protective protein OS=Homo sapiens GN=CTSA PE=1 SV=2	9	19	9	54.431	1.221	1.136	0.933	0.29	0.18	-0.1	93.2	113.9	105.9	87	2.899	67.559	9
P98095	Fibulin-2 OS=Homo sapiens GN=FBLN2 PE=1 SV=2	9	41	9	126.489	1.497	1.361	0.963	0.58	0.45	-0.05	83	124.2	112.9	79.9	1.064	136.363	9
P41222	Prostaglandin-H2 D-isomerase OS=Homo sapiens GN=PTGDS PE=1 SV=1	9	181	9	21.015	1.528	1.593	1.682	0.61	0.67	0.75	68.9	105.3	109.8	115.9	283.804	573.478	9
Q9Y646	Carboxypeptidase Q OS=Homo sapiens GN=CPQ PE=1 SV=1	9	35	9	51.855	1.18	0.758	1.005	0.24	-0.4	0.01	101.5	119.7	76.9	102	4.109	84.4431	9
Q92859	Neogenin OS=Homo sapiens GN=NEO1 PE=1 SV=2	9	13	9	159.917	0.546	0.56	0.634	-0.87	-0.84	-0.66	146	79.7	81.7	92.6	0.444	52.3802	9
P29508	Serpin B3 OS=Homo sapiens GN=SERPINB3 PE=1 SV=2	9	16	9	44.537	1.412	0.642	1.475	0.5	-0.64	0.56	88.3	124.7	56.7	130.3	2.481	57.1062	9
P02753	Retinol-binding protein 4 OS=Homo sapiens GN=RBP4 PE=1 SV=3	9	100	9	22.995	1.313	3.129	0.992	0.39	1.65	-0.01	62.2	81.6	194.5	61.7	315.228	318.908	9
Q04721	Neurogenic locus notch homolog protein 2 OS=Homo sapiens GN=NOTCH2 PE=1 SV=3	9	21	9	265.226	1.904	1.233	1.033	0.93	0.3	0.05	77.4	147.3	95.4	79.9	0.394	55.9518	9
Q8IZF2	Probable G-protein coupled receptor 116 OS=Homo sapiens GN=GPR116 PE=1 SV=3	9	11	9	149.361	0.808	0.674	0.802	-0.31	-0.57	-0.32	121.8	98.4	82.1	97.7	0.515	33.7618	9
P20933	N(4)-(beta-N-acetylglucosaminyl)-L-asparaginase OS=Homo sapiens GN=AGA PE=1 SV=2	9	36	9	37.184	1.342	0.996	1.362	0.42	-0.01	0.45	85.1	114.2	84.7	116	6.079	126.712	9
Q5KU26	Collectin-12 OS=Homo sapiens GN=COLEC12 PE=1 SV=3	9	30	9	81.465	1.114	1.374	1.455	0.16	0.46	0.54	80.9	90.1	111.2	117.8	1.119	92.8484	9
P05413	Fatty acid-binding protein, heart OS=Homo sapiens GN=FABP3 PE=1 SV=4	9	15	9	14.849	0.498	0.564	1.047	-1.01	-0.83	0.07	128.7	64	72.6	134.8	6.017	42.2994	9
P49913	Cathelicidin antimicrobial peptide OS=Homo sapiens GN=CAMP PE=1 SV=1	9	16	9	19.289	2.468	1.61	1.555	1.3	0.69	0.64	60.3	148.8	97.1	93.8	14.849	54.5751	9
P07686	Beta-hexosaminidase subunit beta OS=Homo sapiens GN=HEXB PE=1 SV=3	10	18	9	63.071	1.052	0.861	1.229	0.07	-0.22	0.3	96.6	101.6	83.1	118.7	1.477	52.1516	10
P48740	Mannan-binding lectin serine protease 1 OS=Homo sapiens GN=MASP1 PE=1 SV=3	9	14	9	79.195	1.119	1.397	1.083	0.16	0.48	0.12	87	97.3	121.5	94.2	1.656	42.6949	9
P54760	Ephrin type-B receptor 4 OS=Homo sapiens GN=EPHB4 PE=1 SV=2	9	9	9	108.201	0.788	0.97	0.818	-0.34	-0.04	-0.29	111.9	88.2	108.5	91.5	0.438	32.3207	9
P14543	Nidogen-1 OS=Homo sapiens GN=NID1 PE=1 SV=3	9	25	9	136.291	0.528	0.574	0.622	-0.92	-0.8	-0.68	146.8	77.5	84.3	91.4	0.647	82.024	9
P06702	Protein S100-A9 OS=Homo sapiens GN=S100A9 PE=1 SV=1	9	114	9	13.234	3.425	0.721	0.793	1.78	-0.47	-0.33	67.4	230.6	48.6	53.4	2370.37	372.332	9
P02750	Leucine-rich alpha-2-glycoprotein OS=Homo sapiens GN=LRG1 PE=1 SV=2	9	34	9	38.154	0.513	0.587	1.38	-0.96	-0.77	0.46	115	58.9	67.5	158.6	3.217	117.438	9
P53634	Dipeptidyl peptidase 1 OS=Homo sapiens GN=CTSC PE=1 SV=2	9	24	9	51.82	1.184	1.39	1.023	0.24	0.48	0.03	87	103	121	89	2.311	78.4782	9
Q9Y5Y7	Lymphatic vessel endothelial hyaluronic acid receptor 1 OS=Homo sapiens GN=LYVE1 PE=1 SV=2	9	48	9	35.191	1.141	1.205	1.238	0.19	0.27	0.31	87.3	99.6	105.1	108	9	157.024	9
Q8WZ75	Roundabout homolog 4 OS=Homo sapiens GN=ROBO4 PE=1 SV=1	9	37	9	107.39	0.471	0.511	0.553	-1.09	-0.97	-0.85	157.8	74.4	80.6	87.3	1.399	132.311	9
P80188	Neutrophil gelatinase-associated lipocalin OS=Homo sapiens GN=LCN2 PE=1 SV=2	8	44	8	22.574	2.049	1.578	1.074	1.04	0.66	0.1	70.2	143.8	110.7	75.3	37.312	120.526	8
P78380	Oxidized low-density lipoprotein receptor 1 OS=Homo sapiens GN=OLR1 PE=1 SV=1	8	32	8	30.939	0.629	0.58	0.717	-0.67	-0.79	-0.48	136.7	86	79.3	98	45.416	118.451	8
Q9UBC9	Small proline-rich protein 3 OS=Homo sapiens GN=SPRR3 PE=1 SV=2	8	22	8	18.142	0.454	0.562	1.909	-1.14	-0.83	0.93	101.9	46.2	57.3	194.6	3.642	54.8484	8
P05155	Plasma protease C1 inhibitor OS=Homo sapiens GN=SERPING1 PE=1 SV=2	8	25	8	55.119	0.381	0.52	0.525	-1.39	-0.94	-0.93	164.9	62.8	85.7	86.6	3.642	76.6055	8
P07858	Cathepsin B OS=Homo sapiens GN=CTSB PE=1 SV=3	8	52	8	37.797	1.821	1.195	1.022	0.87	0.26	0.03	79.4	144.6	94.9	81.2	23.484	178.215	8
P16070	CD44 antigen OS=Homo sapiens GN=CD44 PE=1 SV=3	8	92	8	81.487	0.737	0.451	0.641	-0.44	-1.15	-0.64	141.4	104.1	63.8	90.7	1.955	304.959	8
Q14315	Filamin-C OS=Homo sapiens GN=FLNC PE=1 SV=3	8	10	8	290.841	1.768	1.518	1.167	0.82	0.6	0.22	73.4	129.7	111.3	85.6	0.147	25.2028	8
P98172	Ephrin-B1 OS=Homo sapiens GN=EFNB1 PE=1 SV=1	8	35	8	37.982	1.026	1.337	0.972	0.04	0.42	-0.04	92.3	94.7	123.4	89.7	6.305	96.7248	8
P04275	von Willebrand factor OS=Homo sapiens GN=VWF PE=1 SV=4	8	15	8	309.058	0.945	1.235	0.859	-0.08	0.3	-0.22	99	93.6	122.3	85.1	0.179	34.2109	8
P61916	Epididymal secretory protein E1 OS=Homo sapiens GN=NPC2 PE=1 SV=1	8	69	8	16.559	1.946	1.324	1.791	0.96	0.4	0.84	66	128.4	87.4	118.2	157.489	220.141	8
P05556	Integrin beta-1 OS=Homo sapiens GN=ITGB1 PE=1 SV=2	8	12	8	88.357	1.647	0.983	1.298	0.72	-0.02	0.38	81.2	133.7	79.8	105.3	0.679	44.391	8
P13671	Complement component C6 OS=Homo sapiens GN=C6 PE=1 SV=3	8	14	8	104.718	1.281	1.916	0.795	0.36	0.94	-0.33	80.1	102.7	153.5	63.7	0.448	37.4422	8
P11021	78 kDa glucose-regulated protein OS=Homo sapiens GN=HSPA5 PE=1 SV=2	10	14	8	72.288	0.555	0.591	0.654	-0.85	-0.76	-0.61	142.8	79.3	84.4	93.4	0.962	36.5241	10
P15144	Aminopeptidase N OS=Homo sapiens GN=ANPEP PE=1 SV=4	8	10	8	109.471	0.716	1.07	0.831	-0.48	0.1	-0.27	110.6	79.2	118.4	91.9	0.478	29.3658	8
Q07954	Prolow-density lipoprotein receptor-related protein 1 OS=Homo sapiens GN=LRP1 PE=1 SV=2	8	11	8	504.276	1.847	0.899	1.316	0.89	-0.15	0.4	79	146	71	104	0.093	40.0273	8
P00533	Epidermal growth factor receptor OS=Homo sapiens GN=EGFR PE=1 SV=2	8	13	8	134.19	0.944	1.081	1.016	-0.08	0.11	0.02	99	93.4	107	100.6	0.383	39.9521	8
P09668	Pro-cathepsin H OS=Homo sapiens GN=CTSH PE=1 SV=4	8	59	8	37.369	1.153	1.107	1.18	0.21	0.15	0.24	90.1	103.8	99.7	106.3	26.826	180.95	8
Q9NPH3	Interleukin-1 receptor accessory protein OS=Homo sapiens GN=IL1RAP PE=1 SV=2	8	13	8	65.377	0.487	0.83	0.757	-1.04	-0.27	-0.4	130.1	63.3	108	98.5	0.896	46.248	8
Q5JS37	NHL repeat-containing protein 3 OS=Homo sapiens GN=NHLRC3 PE=2 SV=1	8	23	8	38.258	1.147	0.928	1.462	0.2	-0.11	0.55	88.2	101.2	81.8	128.9	3.467	85.2451	8
P60174	Triosephosphate isomerase OS=Homo sapiens GN=TPI1 PE=1 SV=3	8	13	8	30.772	0.455	0.41	1.161	-1.14	-1.29	0.22	132.2	60.2	54.2	153.5	2.793	47.8769	8
O95497	Pantetheinase OS=Homo sapiens GN=VNN1 PE=1 SV=2	8	30	8	56.975	0.9	0.871	1.393	-0.15	-0.2	0.48	96.1	86.5	83.7	133.8	2.914	80.5473	8
P19827	Inter-alpha-trypsin inhibitor heavy chain H1 OS=Homo sapiens GN=ITIH1 PE=1 SV=3	8	13	8	101.326	1.278	1.749	0.908	0.35	0.81	-0.14	81	103.6	141.7	73.6	0.805	50.4906	8
Q8NHP8	Putative phospholipase B-like 2 OS=Homo sapiens GN=PLBD2 PE=1 SV=2	8	19	8	65.43	0.806	0.748	1.161	-0.31	-0.42	0.22	107.7	86.8	80.6	125	1.438	54.9894	8
O94919	Endonuclease domain-containing 1 protein OS=Homo sapiens GN=ENDOD1 PE=1 SV=2	8	58	8	54.981	0.563	0.594	0.796	-0.83	-0.75	-0.33	135.4	76.3	80.4	107.8	3.52	137.293	8
O00241	Signal-regulatory protein beta-1 OS=Homo sapiens GN=SIRPB1 PE=1 SV=5	12	35	8	43.184	0.938	1.039	1.021	-0.09	0.06	0.03	100	93.9	103.9	102.2	4.754	126.272	12
P19438	Tumor necrosis factor receptor superfamily member 1A OS=Homo sapiens GN=TNFRSF1A PE=1 SV=1	8	16	8	50.462	2.817	2.227	0.866	1.49	1.16	-0.21	57.9	163.1	128.9	50.1	2.162	42.8045	8
Q86VB7	Scavenger receptor cysteine-rich type 1 protein M130 OS=Homo sapiens GN=CD163 PE=1 SV=2	8	14	8	125.369	0.861	0.906	0.697	-0.22	-0.14	-0.52	115.5	99.4	104.6	80.5	0.573	41.1874	8
P14780	Matrix metalloproteinase-9 OS=Homo sapiens GN=MMP9 PE=1 SV=3	8	14	8	78.408	3.109	0.795	0.584	1.64	-0.33	-0.78	72.9	226.6	58	42.6	0.805	44.5126	8
P54764	Ephrin type-A receptor 4 OS=Homo sapiens GN=EPHA4 PE=1 SV=1	8	14	8	109.79	0.815	1.157	1.063	-0.29	0.21	0.09	99.1	80.8	114.7	105.4	0.638	46.0281	8
O00391	Sulfhydryl oxidase 1 OS=Homo sapiens GN=QSOX1 PE=1 SV=3	8	24	8	82.526	0.619	0.559	0.904	-0.69	-0.84	-0.14	129.8	80.3	72.6	117.4	0.882	84.59	8
Q9UBG3	Cornulin OS=Homo sapiens GN=CRNN PE=1 SV=1	8	15	8	53.502	0.522	0.655	0.717	-0.94	-0.61	-0.48	138.2	72.1	90.6	99.1	1.471	61.8132	8
Q6UX71	Plexin domain-containing protein 2 OS=Homo sapiens GN=PLXDC2 PE=1 SV=1	9	11	8	59.546	0.83	1.097	0.865	-0.27	0.13	-0.21	105.5	87.5	115.8	91.2	1.154	37.8134	9
O00533	Neural cell adhesion molecule L1-like protein OS=Homo sapiens GN=CHL1 PE=1 SV=4	8	11	8	134.987	0.462	0.475	0.691	-1.11	-1.07	-0.53	152.2	70.4	72.3	105.2	0.477	35.4402	8
P02649	Apolipoprotein E OS=Homo sapiens GN=APOE PE=1 SV=1	8	16	8	36.132	1.054	1.645	0.685	0.08	0.72	-0.55	91.2	96.2	150.1	62.5	2.311	50.2574	8
Q06830	Peroxiredoxin-1 OS=Homo sapiens GN=PRDX1 PE=1 SV=1	8	18	7	22.096	0.447	0.441	0.833	-1.16	-1.18	-0.26	147	65.7	64.8	122.5	9	57.7779	8
Q01469	Fatty acid-binding protein, epidermal OS=Homo sapiens GN=FABP5 PE=1 SV=3	7	15	7	15.155	0.614	0.724	1.099	-0.7	-0.47	0.14	116.4	71.4	84.2	128	9	33.2376	7
P15289	Arylsulfatase A OS=Homo sapiens GN=ARSA PE=1 SV=3	8	43	7	53.554	0.704	0.55	1.211	-0.51	-0.86	0.28	115.4	81.2	63.5	139.8	6.743	136.07	8
P14151	L-selectin OS=Homo sapiens GN=SELL PE=1 SV=2	7	41	7	42.159	1.047	1.179	1.244	0.07	0.24	0.31	89.5	93.7	105.5	111.3	10.548	159.374	7
Q96PD5	N-acetylmuramoyl-L-alanine amidase OS=Homo sapiens GN=PGLYRP2 PE=1 SV=1	7	12	7	62.178	0.794	0.922	1.248	-0.33	-0.12	0.32	100.9	80.1	93	125.9	0.817	39.4357	7
P13611	Versican core protein OS=Homo sapiens GN=VCAN PE=1 SV=3	7	12	7	372.59	0.413	0.5	0.651	-1.28	-1	-0.62	156	64.4	78.1	101.6	0.114	48.6729	7
P61626	Lysozyme C OS=Homo sapiens GN=LYZ PE=1 SV=1	7	25	7	16.526	2.623	0.889	0.487	1.39	-0.17	-1.04	80	209.9	71.1	39	11.328	85.5124	7
O15230	Laminin subunit alpha-5 OS=Homo sapiens GN=LAMA5 PE=1 SV=8	7	12	7	399.479	1.773	1.186	1.061	0.83	0.25	0.09	79.7	141.3	94.5	84.6	0.097	29.9577	7
P06733	Alpha-enolase OS=Homo sapiens GN=ENO1 PE=1 SV=2	7	13	7	47.139	0.493	0.476	0.976	-1.02	-1.07	-0.03	135.8	66.9	64.6	132.6	0.743	36.7143	7
P06280	Alpha-galactosidase A OS=Homo sapiens GN=GLA PE=1 SV=1	7	19	7	48.735	0.69	0.492	0.883	-0.54	-1.02	-0.18	130.5	90	64.2	115.2	2.162	53.7117	7
Q969P0	Immunoglobulin superfamily member 8 OS=Homo sapiens GN=IGSF8 PE=1 SV=1	7	16	7	64.994	0.445	0.303	0.55	-1.17	-1.72	-0.86	174	77.5	52.8	95.7	1.326	56.2096	7
Q15113	Procollagen C-endopeptidase enhancer 1 OS=Homo sapiens GN=PCOLCE PE=1 SV=2	7	29	7	47.942	1.032	1.305	0.727	0.04	0.38	-0.46	98.4	101.6	128.4	71.6	2.631	102.925	7
P05090	Apolipoprotein D OS=Homo sapiens GN=APOD PE=1 SV=1	7	43	7	21.262	1.389	1.276	1.385	0.47	0.35	0.47	79.2	110	101.1	109.7	78.433	125.639	7
P27487	Dipeptidyl peptidase 4 OS=Homo sapiens GN=DPP4 PE=1 SV=2	7	9	7	88.222	0.603	0.64	1.167	-0.73	-0.64	0.22	117.3	70.7	75.1	136.9	0.431	27.4993	7
P02794	Ferritin heavy chain OS=Homo sapiens GN=FTH1 PE=1 SV=2	7	23	7	21.212	1.561	1.795	1.603	0.64	0.84	0.68	67.1	104.8	120.5	107.6	11.115	78.6835	7
Q13421	Mesothelin OS=Homo sapiens GN=MSLN PE=1 SV=2	7	17	7	68.942	0.33	0.341	1.067	-1.6	-1.55	0.09	146.1	48.2	49.8	155.9	1.656	47.5015	7
P07148	Fatty acid-binding protein, liver OS=Homo sapiens GN=FABP1 PE=1 SV=1	7	25	7	14.199	0.622	0.569	1.049	-0.68	-0.81	0.07	123.4	76.8	70.3	129.5	45.416	64.3853	7
P54826	Growth arrest-specific protein 1 OS=Homo sapiens GN=GAS1 PE=1 SV=2	7	11	7	35.67	1.033	0.672	0.957	0.05	-0.57	-0.06	109.2	112.9	73.4	104.5	2.594	42.6916	7
O95980	Reversion-inducing cysteine-rich protein with Kazal motifs OS=Homo sapiens GN=RECK PE=1 SV=1	7	9	7	106.386	0.989	0.773	0.87	-0.02	-0.37	-0.2	110.2	108.9	85.1	95.8	0.478	28.3622	7
P02792	Ferritin light chain OS=Homo sapiens GN=FTL PE=1 SV=2	7	27	7	20.007	0.982	2.05	2.388	-0.03	1.04	1.26	62.3	61.2	127.7	148.8	13.678	108.323	7
P51688	N-sulphoglucosamine sulphohydrolase OS=Homo sapiens GN=SGSH PE=1 SV=1	7	26	7	56.659	0.604	0.542	1.077	-0.73	-0.88	0.11	124.1	75	67.3	133.6	3.507	80.3372	7
P30086	Phosphatidylethanolamine-binding protein 1 OS=Homo sapiens GN=PEBP1 PE=1 SV=3	7	30	7	21.044	0.417	0.418	0.62	-1.26	-1.26	-0.69	162.9	67.9	68.1	101	11.115	80.7262	7
Q6EMK4	Vasorin OS=Homo sapiens GN=VASN PE=1 SV=1	7	25	7	71.668	0.897	0.887	0.816	-0.16	-0.17	-0.29	111.1	99.7	98.6	90.6	1.471	99.5041	7
Q01973	Tyrosine-protein kinase transmembrane receptor ROR1 OS=Homo sapiens GN=ROR1 PE=1 SV=2	8	20	7	104.215	0.749	0.646	0.883	-0.42	-0.63	-0.18	122	91.4	78.8	107.8	1.047	59.7592	8
P12273	Prolactin-inducible protein OS=Homo sapiens GN=PIP PE=1 SV=1	7	25	7	16.562	1.006	0.453	3.924	0.01	-1.14	1.97	62.7	63.1	28.4	245.9	7.254	71.9779	7
P03973	Antileukoproteinase OS=Homo sapiens GN=SLPI PE=1 SV=2	7	19	7	14.316	3.715	0.722	1.021	1.89	-0.47	0.03	61.9	230.1	44.7	63.2	20.544	53.3182	7
P08294	Extracellular superoxide dismutase [Cu-Zn] OS=Homo sapiens GN=SOD3 PE=1 SV=2	7	29	7	25.835	0.664	0.486	0.814	-0.59	-1.04	-0.3	134.9	89.5	65.6	109.9	52.367	90.9888	7
P02763	Alpha-1-acid glycoprotein 1 OS=Homo sapiens GN=ORM1 PE=1 SV=1	9	133	7	23.497	1.25	1.123	2.647	0.32	0.17	1.4	66.4	83.1	74.6	175.9	42.94	445.221	9
Q9UKU9	Angiopoietin-related protein 2 OS=Homo sapiens GN=ANGPTL2 PE=2 SV=1	7	18	7	57.068	0.551	0.592	1.189	-0.86	-0.76	0.25	120	66.2	71.1	142.7	1.371	56.179	7
O43866	CD5 antigen-like OS=Homo sapiens GN=CD5L PE=1 SV=1	7	18	7	38.063	1.344	1.17	0.767	0.43	0.23	-0.38	93.4	125.6	109.4	71.7	1.462	64.1751	7
P35443	Thrombospondin-4 OS=Homo sapiens GN=THBS4 PE=1 SV=2	9	15	7	105.802	2.084	1.38	1.33	1.06	0.47	0.41	69	143.8	95.3	91.8	0.901	58.879	9
P07288	Prostate-specific antigen OS=Homo sapiens GN=KLK3 PE=1 SV=2	7	59	7	28.723	0.71	0.626	1.615	-0.49	-0.68	0.69	101.2	71.9	63.4	163.5	57.78	195.751	7
P07711	Cathepsin L1 OS=Homo sapiens GN=CTSL1 PE=1 SV=2	7	21	7	37.54	1.021	1.072	0.913	0.03	0.1	-0.13	99.9	102	107	91.1	7.377	69.7654	7
P00918	Carbonic anhydrase 2 OS=Homo sapiens GN=CA2 PE=1 SV=2	7	12	7	29.228	0.238	0.375	0.267	-2.07	-1.41	-1.91	212.8	50.6	79.8	56.8	2.875	40.0061	7
P69905	Hemoglobin subunit alpha OS=Homo sapiens GN=HBA1 PE=1 SV=2	7	76	7	15.248	0.193	0.276	0.218	-2.38	-1.86	-2.2	237.1	45.7	65.5	51.7	13334.2	286.646	7
P15328	Folate receptor alpha OS=Homo sapiens GN=FOLR1 PE=1 SV=3	7	53	7	29.799	0.789	0.646	0.856	-0.34	-0.63	-0.22	121.5	95.9	78.5	104	26.384	132.142	7
P29279	Connective tissue growth factor OS=Homo sapiens GN=CTGF PE=1 SV=2	6	12	6	38.065	1.763	1.864	1.226	0.82	0.9	0.29	68.3	120.5	127.4	83.8	0.931	39.4308	6
P19021	Peptidyl-glycine alpha-amidating monooxygenase OS=Homo sapiens GN=PAM PE=1 SV=2	6	8	6	108.263	0.709	0.54	0.862	-0.5	-0.89	-0.21	128.6	91.2	69.4	110.8	0.292	25.8752	6
P17900	Ganglioside GM2 activator OS=Homo sapiens GN=GM2A PE=1 SV=4	6	56	6	20.825	1.589	1.987	1.807	0.67	0.99	0.85	62.7	99.6	124.5	113.2	11.115	169.098	6
Q7Z5L0	Vitelline membrane outer layer protein 1 homolog OS=Homo sapiens GN=VMO1 PE=1 SV=1	6	56	6	21.52	0.318	0.347	0.542	-1.65	-1.53	-0.88	181.2	57.6	62.9	98.2	24.119	161.809	6
Q8WZ42	Titin OS=Homo sapiens GN=TTN PE=1 SV=4	6	9	6	3813.65	1.359	1.823	1.166	0.44	0.87	0.22	74.8	101.7	136.3	87.2	0.007	27.024	6
P31151	Protein S100-A7 OS=Homo sapiens GN=S100A7 PE=1 SV=4	6	17	6	11.464	0.634	0.484	0.76	-0.66	-1.05	-0.4	139	88.1	67.3	105.7	18.307	53.3696	6
Q9H665	IGF-like family receptor 1 OS=Homo sapiens GN=IGFLR1 PE=1 SV=1	6	22	6	37.87	3.203	1.857	1.202	1.68	0.89	0.27	55.1	176.4	102.3	66.2	2.594	74.6735	6
O75368	SH3 domain-binding glutamic acid-rich-like protein OS=Homo sapiens GN=SH3BGRL PE=1 SV=1	6	21	6	12.766	1.357	1.142	0.607	0.44	0.19	-0.72	97.4	132.2	111.2	59.1	16.783	56.8957	6
Q96NY8	Poliovirus receptor-related protein 4 OS=Homo sapiens GN=PVRL4 PE=1 SV=1	6	16	6	55.42	0.345	0.377	0.537	-1.53	-1.41	-0.9	177.1	61.1	66.7	95.1	1.009	60.5428	6
P51884	Lumican OS=Homo sapiens GN=LUM PE=1 SV=2	6	12	6	38.405	0.532	0.603	0.745	-0.91	-0.73	-0.42	138.9	73.9	83.7	103.5	2.162	39.7111	6
Q8TDQ0	Hepatitis A virus cellular receptor 2 OS=Homo sapiens GN=HAVCR2 PE=1 SV=3	6	56	6	33.373	0.497	0.422	0.762	-1.01	-1.25	-0.39	149.2	74.1	62.9	113.8	5.952	147.716	6
O94910	Latrophilin-1 OS=Homo sapiens GN=LPHN1 PE=1 SV=1	6	19	6	162.614	1.333	1.07	1.014	0.41	0.1	0.02	90.5	120.7	96.9	91.8	0.453	42.842	6
Q99538	Legumain OS=Homo sapiens GN=LGMN PE=1 SV=1	6	6	6	49.379	0.966	0.897	0.96	-0.05	-0.16	-0.06	104.6	101.1	93.8	100.5	0.778	20.5788	6
P27930	Interleukin-1 receptor type 2 OS=Homo sapiens GN=IL1R2 PE=1 SV=1	6	8	6	45.392	0.576	0.783	1.05	-0.8	-0.35	0.07	117.3	67.6	91.8	123.2	1.081	19.3944	6
P39060	Collagen alpha-1(XVIII) chain OS=Homo sapiens GN=COL18A1 PE=1 SV=5	6	9	6	178.077	0.705	0.73	0.703	-0.5	-0.45	-0.51	127.5	89.9	93	89.6	0.233	25.7153	6
Q9NQ36	Signal peptide, CUB and EGF-like domain-containing protein 2 OS=Homo sapiens GN=SCUBE2 PE=2 SV=2	6	20	6	109.893	1.469	1.506	1.379	0.55	0.59	0.46	74.7	109.7	112.5	103	0.837	68.3897	6
Q9H444	Charged multivesicular body protein 4b OS=Homo sapiens GN=CHMP4B PE=1 SV=1	6	8	6	24.935	0.293	0.32	0.518	-1.77	-1.64	-0.95	187.7	55	60.1	97.2	1.683	27.3554	6
P22891	Vitamin K-dependent protein Z OS=Homo sapiens GN=PROZ PE=1 SV=2	6	13	6	44.715	0.642	0.66	1.361	-0.64	-0.6	0.44	109.2	70.1	72	148.6	1.512	37.862	6
P06870	Kallikrein-1 OS=Homo sapiens GN=KLK1 PE=1 SV=2	6	64	6	28.871	1.027	0.444	0.883	0.04	-1.17	-0.18	119.2	122.5	53	105.3	25.102	218.76	6
P02647	Apolipoprotein A-I OS=Homo sapiens GN=APOA1 PE=1 SV=1	6	14	6	30.759	1.385	1.066	0.927	0.47	0.09	-0.11	91.3	126.5	97.4	84.7	3.16	35.9379	6
P48637	Glutathione synthetase OS=Homo sapiens GN=GSS PE=1 SV=1	6	6	6	52.352	0.566	0.631	0.967	-0.82	-0.66	-0.05	126.4	71.6	79.7	122.3	0.417	17.316	6
Q86T13	C-type lectin domain family 14 member A OS=Homo sapiens GN=CLEC14A PE=1 SV=1	6	12	6	51.603	0.52	0.51	0.596	-0.94	-0.97	-0.75	152.3	79.3	77.6	90.8	1.154	48.1744	6
P01034	Cystatin-C OS=Homo sapiens GN=CST3 PE=1 SV=1	6	33	6	15.789	0.498	0.605	0.703	-1.01	-0.72	-0.51	142.6	70.9	86.3	100.2	24.119	105.992	6
P08571	Monocyte differentiation antigen CD14 OS=Homo sapiens GN=CD14 PE=1 SV=2	6	15	6	40.051	0.213	0.308	0.752	-2.23	-1.7	-0.41	176	37.5	54.1	132.4	2.548	47.496	6
P62979	Ubiquitin-40S ribosomal protein S27a OS=Homo sapiens GN=RPS27A PE=1 SV=2	6	40	6	17.953	1.026	0.87	0.605	0.04	-0.2	-0.73	114.3	117.2	99.5	69.1	9	119.271	6
P07357	Complement component C8 alpha chain OS=Homo sapiens GN=C8A PE=1 SV=2	6	18	6	65.121	1.587	3.003	0.835	0.67	1.59	-0.26	62.2	98.8	186.9	52	1.264	49.2463	6
P26842	CD27 antigen OS=Homo sapiens GN=CD27 PE=1 SV=2	6	61	6	29.118	1.38	0.966	1.216	0.47	-0.05	0.28	87.7	121	84.7	106.6	14.013	170.037	6
P30530	Tyrosine-protein kinase receptor UFO OS=Homo sapiens GN=AXL PE=1 SV=3	6	35	6	98.273	0.459	0.382	0.609	-1.12	-1.39	-0.72	163.2	75	62.3	99.4	1.54	119.151	6
P40189	Interleukin-6 receptor subunit beta OS=Homo sapiens GN=IL6ST PE=1 SV=2	6	9	6	103.471	0.818	1.001	0.906	-0.29	0	-0.14	107.4	87.9	107.5	97.2	0.355	24.8676	6
Q9Y279	V-set and immunoglobulin domain-containing protein 4 OS=Homo sapiens GN=VSIG4 PE=1 SV=1	6	17	6	43.959	0.875	1	0.812	-0.19	0	-0.3	108.5	94.9	108.5	88.1	1.994	44.5887	6
P19440	Gamma-glutamyltranspeptidase 1 OS=Homo sapiens GN=GGT1 PE=1 SV=2	6	14	6	61.372	0.614	0.598	1.116	-0.7	-0.74	0.16	120.2	73.8	71.9	134.1	1.102	39.5785	6
Q92520	Protein FAM3C OS=Homo sapiens GN=FAM3C PE=1 SV=1	6	11	6	24.665	0.39	0.505	0.832	-1.36	-0.99	-0.27	146.7	57.2	74	122.1	2.652	33.7385	6
P78310	Coxsackievirus and adenovirus receptor OS=Homo sapiens GN=CXADR PE=1 SV=1	6	9	6	40.004	1.611	2.039	1.467	0.69	1.03	0.55	65.4	105.4	133.3	95.9	0.905	26.9548	6
Q5VY43	Platelet endothelial aggregation receptor 1 OS=Homo sapiens GN=PEAR1 PE=1 SV=1	6	11	6	110.591	1.789	1.207	0.855	0.84	0.27	-0.23	82.5	147.5	99.5	70.5	0.753	33.901	6
Q14210	Lymphocyte antigen 6D OS=Homo sapiens GN=LY6D PE=1 SV=1	6	14	6	13.278	2.532	1.791	0.866	1.34	0.84	-0.21	64.6	163.6	115.8	56	18.307	35.8935	6
P16112	Aggrecan core protein OS=Homo sapiens GN=ACAN PE=1 SV=2	6	11	6	250.04	0.759	0.691	0.745	-0.4	-0.53	-0.43	125.2	95	86.5	93.3	0.366	38.5984	6
P35052	Glypican-1 OS=Homo sapiens GN=GPC1 PE=1 SV=2	6	8	6	61.641	0.738	0.675	0.867	-0.44	-0.57	-0.21	121.9	90	82.3	105.8	0.607	25.4629	6
Q9BY67	Cell adhesion molecule 1 OS=Homo sapiens GN=CADM1 PE=1 SV=2	6	47	6	48.478	0.42	0.321	0.581	-1.25	-1.64	-0.78	172.2	72.4	55.3	100.1	4.109	139.76	6
P20810	Calpastatin OS=Homo sapiens GN=CAST PE=1 SV=4	6	9	6	76.526	0.441	0.45	0.44	-1.18	-1.15	-1.18	171.6	75.7	77.2	75.5	0.496	27.9965	6
P31025	Lipocalin-1 OS=Homo sapiens GN=LCN1 PE=1 SV=1	6	17	6	19.238	1.045	1.142	1.368	0.06	0.19	0.45	87.8	91.8	100.3	120.2	5.579	62.1121	6
Q12841	Follistatin-related protein 1 OS=Homo sapiens GN=FSTL1 PE=1 SV=1	6	8	6	34.963	0.52	0.379	0.874	-0.94	-1.4	-0.19	144.3	75	54.7	126.1	0.823	24.8389	6
P48745	Protein NOV homolog OS=Homo sapiens GN=NOV PE=1 SV=1	6	19	6	39.135	1.608	1.05	1.019	0.69	0.07	0.03	85.5	137.5	89.8	87.2	1.565	72.0847	6
P07355	Annexin A2 OS=Homo sapiens GN=ANXA2 PE=1 SV=2	6	8	6	38.58	0.571	0.567	0.483	-0.81	-0.82	-1.05	152.6	87.2	86.5	73.7	1.154	26.2889	6
P24592	Insulin-like growth factor-binding protein 6 OS=Homo sapiens GN=IGFBP6 PE=1 SV=1	6	14	6	25.306	1.317	1.412	0.998	0.4	0.5	0	84.6	111.5	119.5	84.4	6.017	44.4045	6
Q9UM47	Neurogenic locus notch homolog protein 3 OS=Homo sapiens GN=NOTCH3 PE=1 SV=2	6	10	6	243.468	1.855	1.634	1.21	0.89	0.71	0.27	70.2	130.2	114.7	84.9	0.196	33.5393	6
Q96S96	Phosphatidylethanolamine-binding protein 4 OS=Homo sapiens GN=PEBP4 PE=1 SV=3	6	41	6	25.717	1.712	1.716	1.199	0.78	0.78	0.26	71.1	121.7	122	85.2	24.119	99.2996	6
P80723	Brain acid soluble protein 1 OS=Homo sapiens GN=BASP1 PE=1 SV=2	6	15	6	22.68	1.788	0.983	1.044	0.84	-0.02	0.06	83.1	148.5	81.7	86.8	4.878	56.1705	6
P07476	Involucrin OS=Homo sapiens GN=IVL PE=1 SV=2	6	6	6	68.437	1.01	0.998	1.46	0.01	0	0.55	89.5	90.4	89.4	130.7	0.438	17.7877	6
P05451	Lithostathine-1-alpha OS=Homo sapiens GN=REG1A PE=1 SV=3	8	52	6	18.719	1.031	2.585	0.838	0.04	1.37	-0.25	73.3	75.6	189.6	61.5	34.938	169.548	8
P15151	Poliovirus receptor OS=Homo sapiens GN=PVR PE=1 SV=2	6	14	6	45.274	0.205	0.28	0.55	-2.28	-1.84	-0.86	196.5	40.4	55	108.1	4.623	45.5611	6
Q13449	Limbic system-associated membrane protein OS=Homo sapiens GN=LSAMP PE=1 SV=2	6	14	6	37.37	0.511	0.403	0.955	-0.97	-1.31	-0.07	139.4	71.2	56.3	133.1	1.228	45.2271	6
P08185	Corticosteroid-binding globulin OS=Homo sapiens GN=SERPINA6 PE=1 SV=1	6	16	6	45.112	0.565	0.941	1.059	-0.82	-0.09	0.08	112.2	63.4	105.6	118.8	1.976	45.6555	6
P07998	Ribonuclease pancreatic OS=Homo sapiens GN=RNASE1 PE=1 SV=4	6	405	6	17.633	1.441	1.213	1.006	0.53	0.28	0.01	85.8	123.7	104.1	86.4	599483	1313.17	6
Q08174	Protocadherin-1 OS=Homo sapiens GN=PCDH1 PE=1 SV=2	6	10	6	114.673	0.287	0.294	0.492	-1.8	-1.77	-1.02	193	55.4	56.7	94.9	0.38	28.1535	6
P19652	Alpha-1-acid glycoprotein 2 OS=Homo sapiens GN=ORM2 PE=1 SV=2	8	87	6	23.588	1.473	1.085	3.06	0.56	0.12	1.61	60.4	89.1	65.6	185	18.307	271.539	8
Q14508	WAP four-disulfide core domain protein 2 OS=Homo sapiens GN=WFDC2 PE=1 SV=2	6	152	6	12.984	1.914	1.243	1.174	0.94	0.31	0.23	75	143.6	93.2	88.1	31621.8	414.684	6
Q96RW7	Hemicentin-1 OS=Homo sapiens GN=HMCN1 PE=1 SV=2	6	22	6	613.001	0.663	0.697	0.599	-0.59	-0.52	-0.74	135.2	89.6	94.3	81	0.108	57.5262	6
P16284	Platelet endothelial cell adhesion molecule OS=Homo sapiens GN=PECAM1 PE=1 SV=1	6	15	6	82.484	0.832	0.705	1.067	-0.26	-0.5	0.09	111	92.4	78.2	118.4	0.585	48.274	6
P03952	Plasma kallikrein OS=Homo sapiens GN=KLKB1 PE=1 SV=1	6	7	6	71.323	1.442	2.185	0.916	0.53	1.13	-0.13	72.2	104	157.7	66.1	0.442	22.2253	6
Q15828	Cystatin-M OS=Homo sapiens GN=CST6 PE=1 SV=1	6	67	6	16.5	1.37	2.701	0.986	0.45	1.43	-0.02	66	90.5	178.4	65.1	150.991	200.213	6
P23528	Cofilin-1 OS=Homo sapiens GN=CFL1 PE=1 SV=3	6	7	6	18.491	0.318	0.253	0.388	-1.65	-1.98	-1.37	204.2	64.9	51.6	79.2	2.831	23.8346	6
Q03403	Trefoil factor 2 OS=Homo sapiens GN=TFF2 PE=1 SV=2	6	50	6	14.274	1.505	0.82	1.647	0.59	-0.29	0.72	80.5	121.1	66	132.5	137.95	174.442	6
Q06481	Amyloid-like protein 2 OS=Homo sapiens GN=APLP2 PE=1 SV=2	7	14	6	86.9	1.289	1.002	1.096	0.37	0	0.13	91.2	117.5	91.4	100	0.734	40.2844	7
P46940	Ras GTPase-activating-like protein IQGAP1 OS=Homo sapiens GN=IQGAP1 PE=1 SV=1	6	7	6	189.134	2.556	1.507	0.954	1.35	0.59	-0.07	66.5	169.9	100.2	63.4	0.157	19.8619	6
P37840	Alpha-synuclein OS=Homo sapiens GN=SNCA PE=1 SV=1	6	11	6	14.451	0.291	0.348	0.29	-1.78	-1.52	-1.79	207.4	60.3	72.2	60.1	12.335	42.8249	6
Q96FE7	Phosphoinositide-3-kinase-interacting protein 1 OS=Homo sapiens GN=PIK3IP1 PE=1 SV=2	6	125	6	28.23	1.672	0.772	1.139	0.74	-0.37	0.19	87.3	145.9	67.4	99.4	9	407.177	6
P06727	Apolipoprotein A-IV OS=Homo sapiens GN=APOA4 PE=1 SV=3	6	6	6	45.371	0.857	0.974	0.869	-0.22	-0.04	-0.2	108.1	92.6	105.3	94	0.638	17.2601	6
P54107	Cysteine-rich secretory protein 1 OS=Homo sapiens GN=CRISP1 PE=1 SV=1	5	7	5	28.462	2.199	0.769	3.278	1.14	-0.38	1.71	55.2	121.4	42.5	181	2.162	22.5052	5
Q8WWZ8	Oncoprotein-induced transcript 3 protein OS=Homo sapiens GN=OIT3 PE=1 SV=2	5	7	5	59.983	0.667	0.729	0.902	-0.58	-0.46	-0.15	121.3	80.9	88.4	109.4	0.61	18.814	5
P08519	Apolipoprotein(a) OS=Homo sapiens GN=LPA PE=1 SV=1	5	10	5	500.995	1.17	0.861	0.79	0.23	-0.22	-0.34	104.7	122.5	90.1	82.7	0.081	33.0466	5
Q16769	Glutaminyl-peptide cyclotransferase OS=Homo sapiens GN=QPCT PE=1 SV=1	5	14	5	40.851	1.036	0.612	1.904	0.05	-0.71	0.93	87.9	91	53.8	167.3	1.976	36.8217	5
P51654	Glypican-3 OS=Homo sapiens GN=GPC3 PE=1 SV=1	5	8	5	65.52	0.577	0.627	1.081	-0.79	-0.67	0.11	121.8	70.3	76.3	131.6	0.743	23.4632	5
P06865	Beta-hexosaminidase subunit alpha OS=Homo sapiens GN=HEXA PE=1 SV=2	6	9	5	60.664	1.08	0.908	1.375	0.11	-0.14	0.46	91.7	99	83.3	126.1	0.668	27.2773	6
Q02413	Desmoglein-1 OS=Homo sapiens GN=DSG1 PE=1 SV=2	5	5	5	113.676	0.862	1.045	0.751	-0.21	0.06	-0.41	109.4	94.3	114.2	82.1	0.299	18.3571	5
P05160	Coagulation factor XIII B chain OS=Homo sapiens GN=F13B PE=1 SV=3	5	11	5	75.461	1.457	2.257	0.913	0.54	1.17	-0.13	71.1	103.6	160.4	64.9	0.701	32.5454	5
P10586	Receptor-type tyrosine-protein phosphatase F OS=Homo sapiens GN=PTPRF PE=1 SV=2	5	5	5	212.744	0.657	0.842	0.781	-0.61	-0.25	-0.36	122	80.1	102.7	95.2	0.087	13.1543	5
P10153	Non-secretory ribonuclease OS=Homo sapiens GN=RNASE2 PE=1 SV=2	5	203	5	18.342	1.757	0.86	0.93	0.81	-0.22	-0.11	88	154.6	75.7	81.8	5.62341e+06	691.559	5
Q7KYR7	Butyrophilin subfamily 2 member A1 OS=Homo sapiens GN=BTN2A1 PE=1 SV=3	5	10	5	59.594	0.823	0.607	0.943	-0.28	-0.72	-0.08	118.6	97.6	72	111.8	0.585	34.7516	5
P13727	Bone marrow proteoglycan OS=Homo sapiens GN=PRG2 PE=1 SV=2	5	8	5	25.189	0.977	0.724	1.306	-0.03	-0.47	0.39	99.8	97.5	72.3	130.4	1.929	26.6446	5
Q5JRA6	Melanoma inhibitory activity protein 3 OS=Homo sapiens GN=MIA3 PE=1 SV=1	5	5	5	213.57	0.701	0.736	1.088	-0.51	-0.44	0.12	113.5	79.6	83.5	123.5	0.097	16.8476	5
Q99497	Protein DJ-1 OS=Homo sapiens GN=PARK7 PE=1 SV=2	5	9	5	19.878	0.208	0.333	0.438	-2.27	-1.58	-1.19	202.1	42	67.4	88.5	1.424	27.9731	5
P24855	Deoxyribonuclease-1 OS=Homo sapiens GN=DNASE1 PE=1 SV=1	5	16	5	31.414	0.443	0.389	1.587	-1.17	-1.36	0.67	117	51.9	45.5	185.6	6.017	49.9406	5
P78504	Protein jagged-1 OS=Homo sapiens GN=JAG1 PE=1 SV=3	5	7	5	133.709	1.489	1.035	0.804	0.57	0.05	-0.32	92.4	137.6	95.7	74.3	0.281	21.4458	5
Q8IWY4	Signal peptide, CUB and EGF-like domain-containing protein 1 OS=Homo sapiens GN=SCUBE1 PE=1 SV=3	5	18	5	107.839	3.095	3.22	1.811	1.63	1.69	0.86	43.8	135.6	141.1	79.4	0.616	26.7709	5
P28908	Tumor necrosis factor receptor superfamily member 8 OS=Homo sapiens GN=TNFRSF8 PE=1 SV=1	5	6	5	63.706	1.187	0.831	0.962	0.25	-0.27	-0.06	100.5	119.3	83.5	96.7	0.417	20.0345	5
P16035	Metalloproteinase inhibitor 2 OS=Homo sapiens GN=TIMP2 PE=1 SV=2	5	11	5	24.383	0.676	0.517	0.729	-0.57	-0.95	-0.46	136.9	92.5	70.8	99.8	1.929	28.3685	5
P51858	Hepatoma-derived growth factor OS=Homo sapiens GN=HDGF PE=1 SV=1	5	7	5	26.772	0.341	0.333	0.537	-1.55	-1.59	-0.9	180.9	61.7	60.2	97.1	0.968	15.9154	5
P08138	Tumor necrosis factor receptor superfamily member 16 OS=Homo sapiens GN=NGFR PE=1 SV=1	5	24	5	45.154	1.758	0.859	1.162	0.81	-0.22	0.22	83.7	147.2	71.9	97.3	4.817	82.3547	5
O75503	Ceroid-lipofuscinosis neuronal protein 5 OS=Homo sapiens GN=CLN5 PE=1 SV=2	5	5	5	41.47	0.342	0.6	0.689	-1.55	-0.74	-0.54	152	52	91.2	104.8	0.688	12.746	5
P08572	Collagen alpha-2(IV) chain OS=Homo sapiens GN=COL4A2 PE=1 SV=4	5	8	5	167.449	0.56	0.637	0.658	-0.84	-0.65	-0.6	140.1	78.5	89.2	92.2	0.15	26.7116	5
P07237	Protein disulfide-isomerase OS=Homo sapiens GN=P4HB PE=1 SV=3	5	7	5	57.081	0.464	0.493	0.664	-1.11	-1.02	-0.59	152.6	70.9	75.2	101.3	0.413	18.9246	5
Q9GZM7	Tubulointerstitial nephritis antigen-like OS=Homo sapiens GN=TINAGL1 PE=1 SV=1	5	5	5	52.353	0.827	0.641	0.865	-0.27	-0.64	-0.21	120	99.2	77	103.8	0.616	13.8509	5
P04180	Phosphatidylcholine-sterol acyltransferase OS=Homo sapiens GN=LCAT PE=1 SV=1	5	7	5	49.546	0.577	0.718	1.171	-0.79	-0.48	0.23	115.4	66.6	82.9	135.1	0.931	21.2102	5
P62158	Calmodulin OS=Homo sapiens GN=CALM1 PE=1 SV=2	6	24	5	16.827	0.513	0.441	1.09	-0.96	-1.18	0.12	131.4	67.4	57.9	143.2	14.849	88.4489	6
Q9BZR6	Reticulon-4 receptor OS=Homo sapiens GN=RTN4R PE=1 SV=1	5	6	5	50.676	0.765	0.678	1.018	-0.39	-0.56	0.03	115.6	88.4	78.3	117.7	0.487	21.7468	5
P42785	Lysosomal Pro-X carboxypeptidase OS=Homo sapiens GN=PRCP PE=1 SV=1	5	9	5	55.764	0.783	0.561	0.926	-0.35	-0.83	-0.11	122.3	95.8	68.6	113.2	0.823	22.8103	5
P08123	Collagen alpha-2(I) chain OS=Homo sapiens GN=COL1A2 PE=1 SV=7	5	6	5	129.235	0.419	0.407	0.507	-1.26	-1.3	-0.98	171.5	71.8	69.8	86.9	0.149	23.0737	5
P54108	Cysteine-rich secretory protein 3 OS=Homo sapiens GN=CRISP3 PE=1 SV=1	5	52	5	27.612	1.134	0.992	1.169	0.18	-0.01	0.22	93.1	105.7	92.4	108.8	13.678	127.832	5
P26038	Moesin OS=Homo sapiens GN=MSN PE=1 SV=3	10	12	5	67.778	0.649	0.505	0.647	-0.62	-0.98	-0.63	142.8	92.6	72.2	92.4	0.855	42.6291	10
Q9HBR0	Putative sodium-coupled neutral amino acid transporter 10 OS=Homo sapiens GN=SLC38A10 PE=1 SV=2	5	8	5	119.687	0.582	0.695	0.686	-0.78	-0.52	-0.54	135	78.6	93.8	92.6	0.292	25.4523	5
P68871	Hemoglobin subunit beta OS=Homo sapiens GN=HBB PE=1 SV=2	10	132	5	15.988	0.198	0.231	0.196	-2.33	-2.11	-2.35	246.1	48.8	57	48.1	656.933	477.398	10
P04066	Tissue alpha-L-fucosidase OS=Homo sapiens GN=FUCA1 PE=1 SV=4	5	6	5	53.655	0.943	1.021	1.873	-0.08	0.03	0.91	82.7	78	84.4	154.9	0.738	20.1196	5
Q9GZX9	Twisted gastrulation protein homolog 1 OS=Homo sapiens GN=TWSG1 PE=2 SV=1	5	21	5	24.999	1.581	1.008	1.161	0.66	0.01	0.22	84.2	133.1	84.9	97.8	14.849	77.852	5
P55285	Cadherin-6 OS=Homo sapiens GN=CDH6 PE=1 SV=1	5	5	5	88.254	0.145	0.198	0.502	-2.79	-2.33	-0.99	216.8	31.3	43	108.8	0.315	18.3502	5
P22352	Glutathione peroxidase 3 OS=Homo sapiens GN=GPX3 PE=1 SV=2	5	19	5	25.537	0.816	0.643	1.029	-0.29	-0.64	0.04	114.7	93.6	73.7	118	3.924	62.0183	5
P24593	Insulin-like growth factor-binding protein 5 OS=Homo sapiens GN=IGFBP5 PE=1 SV=1	5	12	5	30.55	0.946	0.928	0.757	-0.08	-0.11	-0.4	110.2	104.2	102.2	83.4	2.415	42.3459	5
P31944	Caspase-14 OS=Homo sapiens GN=CASP14 PE=1 SV=2	5	7	5	27.662	1.206	1.173	0.974	0.27	0.23	-0.04	91.9	110.8	107.8	89.5	1.448	25.4887	5
Q07075	Glutamyl aminopeptidase OS=Homo sapiens GN=ENPEP PE=1 SV=3	5	6	5	109.176	0.802	0.928	0.867	-0.32	-0.11	-0.21	111.2	89.2	103.2	96.4	0.269	13.4704	5
P11117	Lysosomal acid phosphatase OS=Homo sapiens GN=ACP2 PE=1 SV=3	5	11	5	48.313	0.586	0.657	1.364	-0.77	-0.61	0.45	110.9	65	72.8	151.3	1.228	29.6284	5
P30044	Peroxiredoxin-5, mitochondrial OS=Homo sapiens GN=PRDX5 PE=1 SV=4	5	5	5	22.073	0.432	0.377	0.58	-1.21	-1.41	-0.79	167.5	72.4	63.1	97.1	1.424	13.5209	5
P02452	Collagen alpha-1(I) chain OS=Homo sapiens GN=COL1A1 PE=1 SV=5	5	12	5	138.857	1.583	1.529	1.072	0.66	0.61	0.1	77.2	122.2	118	82.7	0.196	35.5268	5
P26992	Ciliary neurotrophic factor receptor subunit alpha OS=Homo sapiens GN=CNTFR PE=1 SV=2	5	10	5	40.607	1.003	1.022	1.103	0	0.03	0.14	96.9	97.2	99	106.9	1.783	32.6455	5
Q9NZP8	Complement C1r subcomponent-like protein OS=Homo sapiens GN=C1RL PE=1 SV=2	5	13	5	53.464	0.455	0.448	0.892	-1.14	-1.16	-0.17	143.1	65.1	64.1	127.7	0.978	50.5567	5
Q9NPY3	Complement component C1q receptor OS=Homo sapiens GN=CD93 PE=1 SV=3	5	12	5	68.515	0.912	1.241	1.105	-0.13	0.31	0.14	93.9	85.7	116.6	103.8	0.743	20.3953	5
P00740	Coagulation factor IX OS=Homo sapiens GN=F9 PE=1 SV=2	5	6	5	51.745	1.912	2.837	0.933	0.94	1.5	-0.1	59.9	114.5	169.8	55.8	0.45	24.96	5
P06734	Low affinity immunoglobulin epsilon Fc receptor OS=Homo sapiens GN=FCER2 PE=1 SV=1	5	7	5	36.446	1.127	1.135	0.967	0.17	0.18	-0.05	94.6	106.6	107.3	91.4	0.995	21.6236	5
Q03154	Aminoacylase-1 OS=Homo sapiens GN=ACY1 PE=1 SV=1	5	7	5	45.856	0.835	0.75	0.997	-0.26	-0.41	0	111.7	93.2	83.8	111.4	0.557	16.6516	5
O76076	WNT1-inducible-signaling pathway protein 2 OS=Homo sapiens GN=WISP2 PE=1 SV=1	5	11	5	26.807	1.266	1.361	0.945	0.34	0.44	-0.08	87.5	110.8	119.1	82.7	4.623	40.9735	5
P01033	Metalloproteinase inhibitor 1 OS=Homo sapiens GN=TIMP1 PE=1 SV=1	5	8	5	23.156	0.611	0.458	0.896	-0.71	-1.13	-0.16	134.9	82.4	61.8	120.9	3.329	28.0063	5
P01857	Ig gamma-1 chain C region OS=Homo sapiens GN=IGHG1 PE=1 SV=1	12	172	5	36.083	0.979	1.499	0.892	-0.03	0.58	-0.16	91.5	89.6	137.2	81.7	734.642	540.398	12
P10599	Thioredoxin OS=Homo sapiens GN=TXN PE=1 SV=3	5	20	5	11.73	1.025	0.713	0.709	0.04	-0.49	-0.5	116	119	82.8	82.3	36.276	71.4959	5
Q9P121	Neurotrimin OS=Homo sapiens GN=NTM PE=1 SV=1	6	15	5	37.947	0.462	0.406	0.69	-1.11	-1.3	-0.54	156.4	72.3	63.5	107.8	2.162	53.827	6
Q99574	Neuroserpin OS=Homo sapiens GN=SERPINI1 PE=1 SV=1	5	6	5	46.397	1.284	1.008	1.003	0.36	0.01	0	93.1	119.5	93.9	93.5	0.778	17.4695	5
P15941	Mucin-1 OS=Homo sapiens GN=MUC1 PE=1 SV=3	5	14	5	122.029	0.494	0.604	0.591	-1.02	-0.73	-0.76	148.8	73.5	89.9	87.9	3.394	46.2229	5
Q6PK18	PKHD domain-containing transmembrane protein C17orf101 OS=Homo sapiens GN=C17orf101 PE=2 SV=2	5	5	5	35.624	0.365	0.345	0.539	-1.46	-1.54	-0.89	177.9	64.9	61.3	95.9	0.896	19.0448	5
P17813	Endoglin OS=Homo sapiens GN=ENG PE=1 SV=2	5	7	5	70.533	0.604	0.655	0.732	-0.73	-0.61	-0.45	133.7	80.8	87.5	97.9	0.711	19.1882	5
Q7Z7G0	Target of Nesh-SH3 OS=Homo sapiens GN=ABI3BP PE=1 SV=1	5	9	5	118.569	0.606	0.47	0.865	-0.72	-1.09	-0.21	136	82.4	63.9	117.7	0.353	28.2892	5
Q08345	Epithelial discoidin domain-containing receptor 1 OS=Homo sapiens GN=DDR1 PE=1 SV=1	5	10	5	101.063	0.514	0.429	1.099	-0.96	-1.22	0.14	131.5	67.5	56.4	144.6	0.567	28.6679	5
P29966	Myristoylated alanine-rich C-kinase substrate OS=Homo sapiens GN=MARCKS PE=1 SV=4	5	12	5	31.536	1.126	1.911	0.982	0.17	0.93	-0.03	79.7	89.7	152.3	78.3	4.623	44.7623	5
P05787	Keratin, type II cytoskeletal 8 OS=Homo sapiens GN=KRT8 PE=1 SV=7	11	28	5	53.671	1.008	0.917	1.022	0.01	-0.12	0.03	101.3	102.2	92.9	103.6	1.955	101.167	11
P14207	Folate receptor beta OS=Homo sapiens GN=FOLR2 PE=1 SV=4	7	15	5	29.26	1.102	1.291	1.394	0.14	0.37	0.48	83.6	92.1	107.9	116.5	3.87	43.8531	7
O75339	Cartilage intermediate layer protein 1 OS=Homo sapiens GN=CILP PE=1 SV=4	5	8	5	132.48	1.3	0.84	0.949	0.38	-0.25	-0.08	97.8	127.2	82.2	92.8	0.194	23.9691	5
P01876	Ig alpha-1 chain C region OS=Homo sapiens GN=IGHA1 PE=1 SV=2	12	116	5	37.631	1.362	1.912	0.601	0.45	0.93	-0.74	82.1	111.8	156.9	49.3	99	378.177	12
Q13740	CD166 antigen OS=Homo sapiens GN=ALCAM PE=1 SV=2	5	11	5	65.061	0.708	0.8	0.979	-0.5	-0.32	-0.03	114.7	81.2	91.8	112.3	0.655	33.1437	5
P07942	Laminin subunit beta-1 OS=Homo sapiens GN=LAMB1 PE=1 SV=2	5	15	5	197.909	1.567	0.993	0.973	0.65	-0.01	-0.04	88.3	138.3	87.6	85.8	0.262	35.7723	5
P50897	Palmitoyl-protein thioesterase 1 OS=Homo sapiens GN=PPT1 PE=1 SV=1	5	12	5	34.171	1.212	0.807	1.53	0.28	-0.31	0.61	87.9	106.6	71	134.5	2.981	39.6644	5
Q9Y624	Junctional adhesion molecule A OS=Homo sapiens GN=F11R PE=1 SV=1	5	7	5	32.562	0.572	0.6	0.742	-0.81	-0.74	-0.43	137.3	78.5	82.4	101.9	1.154	24.4371	5
P36980	Complement factor H-related protein 2 OS=Homo sapiens GN=CFHR2 PE=1 SV=1	9	35	5	30.631	1.24	3.308	0.858	0.31	1.73	-0.22	62.4	77.4	206.6	53.5	9	99.6171	9
Q8NDA2	Hemicentin-2 OS=Homo sapiens GN=HMCN2 PE=2 SV=2	5	7	5	542.264	0.753	0.683	0.748	-0.41	-0.55	-0.42	125.7	94.6	85.8	94	0.066	22.926	5
Q92673	Sortilin-related receptor OS=Homo sapiens GN=SORL1 PE=1 SV=2	5	5	5	248.267	1.642	0.81	0.793	0.72	-0.3	-0.34	94.2	154.7	76.4	74.7	0.088	13.3453	5
P08473	Neprilysin OS=Homo sapiens GN=MME PE=1 SV=2	5	8	5	85.46	0.735	0.967	1.1	-0.44	-0.05	0.14	105.2	77.3	101.7	115.8	0.506	15.1287	5
Q9UHI8	A disintegrin and metalloproteinase with thrombospondin motifs 1 OS=Homo sapiens GN=ADAMTS1 PE=1 SV=4	5	8	5	105.29	1.571	1.842	1.236	0.65	0.88	0.31	70.8	111.3	130.4	87.5	0.389	27.659	5
P07360	Complement component C8 gamma chain OS=Homo sapiens GN=C8G PE=1 SV=3	5	9	5	22.264	1.277	2.524	0.87	0.35	1.34	-0.2	70.5	90.1	178	61.4	3.125	28.9496	5
P07204	Thrombomodulin OS=Homo sapiens GN=THBD PE=1 SV=2	5	14	5	60.289	1.131	0.839	0.692	0.18	-0.25	-0.53	109.2	123.5	91.6	75.6	4.08	48.9727	5
Q05707	Collagen alpha-1(XIV) chain OS=Homo sapiens GN=COL14A1 PE=1 SV=3	5	9	5	193.394	1.184	0.824	0.902	0.24	-0.28	-0.15	102.3	121.1	84.3	92.3	0.166	32.4171	5
P39059	Collagen alpha-1(XV) chain OS=Homo sapiens GN=COL15A1 PE=1 SV=2	5	17	5	141.632	0.48	0.705	0.495	-1.06	-0.5	-1.02	149.3	71.6	105.2	73.8	0.468	53.2609	5
Q9UNZ2	NSFL1 cofactor p47 OS=Homo sapiens GN=NSFL1C PE=1 SV=2	5	7	5	40.548	0.736	0.652	0.575	-0.44	-0.62	-0.8	135	99.4	88	77.6	0.616	22.117	5
P08697	Alpha-2-antiplasmin OS=Homo sapiens GN=SERPINF2 PE=1 SV=3	5	11	5	54.531	0.991	1.293	1.337	-0.01	0.37	0.42	86.6	85.8	111.9	115.7	0.957	37.4198	5
P01834	Ig kappa chain C region OS=Homo sapiens GN=IGKC PE=1 SV=1	5	162	5	11.602	0.897	1.237	1.03	-0.16	0.31	0.04	96.1	86.2	118.8	98.9	15847.9	465.353	5
O75144	ICOS ligand OS=Homo sapiens GN=ICOSLG PE=1 SV=2	4	12	4	33.328	0.565	0.673	0.832	-0.82	-0.57	-0.27	130.3	73.6	87.7	108.4	2.162	36.3024	4
P04083	Annexin A1 OS=Homo sapiens GN=ANXA1 PE=1 SV=2	4	6	4	38.69	0.331	0.379	0.329	-1.6	-1.4	-1.6	196.1	64.9	74.4	64.6	0.931	24.5538	4
Q8N6Q3	CD177 antigen OS=Homo sapiens GN=CD177 PE=1 SV=2	4	12	4	46.332	1.797	1.676	0.915	0.85	0.74	-0.13	74.2	133.4	124.4	67.9	1.783	35.8557	4
P09871	Complement C1s subcomponent OS=Homo sapiens GN=C1S PE=1 SV=1	4	11	4	76.635	1.952	2.366	0.82	0.96	1.24	-0.29	65.2	127.2	154.2	53.4	0.84	30.7941	4
P07478	Trypsin-2 OS=Homo sapiens GN=PRSS2 PE=1 SV=1	5	33	4	26.471	1.779	2.765	1.066	0.83	1.47	0.09	60.5	107.7	167.3	64.5	18.953	75.8732	5
P07477	Trypsin-1 OS=Homo sapiens GN=PRSS1 PE=1 SV=1	5	23	4	26.541	1.467	1.523	0.866	0.55	0.61	-0.21	82.4	120.9	125.4	71.3	5.105	52.7955	5
P36957	Dihydrolipoyllysine-residue succinyltransferase component of 2-oxoglutarate dehydrogenase complex, mitochondrial OS=Homo sapiens GN=DLST PE=1 SV=4	4	8	4	48.724	0.639	0.591	0.859	-0.65	-0.76	-0.22	129.5	82.8	76.5	111.2	0.616	26.4457	4
Q6P4A8	Phospholipase B-like 1 OS=Homo sapiens GN=PLBD1 PE=1 SV=2	4	4	4	63.214	3.069	0.787	0.747	1.62	-0.35	-0.42	71.4	219.1	56.2	53.3	0.445	12.5393	4
P22897	Macrophage mannose receptor 1 OS=Homo sapiens GN=MRC1 PE=1 SV=1	4	4	4	165.905	0.959	2.752	1.075	-0.06	1.46	0.1	69.1	66.3	190.2	74.3	0.117	11.5073	4
P01859	Ig gamma-2 chain C region OS=Homo sapiens GN=IGHG2 PE=1 SV=2	11	157	4	35.878	0.869	1.166	0.784	-0.2	0.22	-0.35	104.8	91	122.2	82.1	267.27	467.91	11
P27482	Calmodulin-like protein 3 OS=Homo sapiens GN=CALML3 PE=1 SV=2	5	7	4	16.88	0.322	0.324	0.638	-1.64	-1.63	-0.65	175.1	56.4	56.7	111.8	1.848	22.499	5
Q02747	Guanylin OS=Homo sapiens GN=GUCA2A PE=1 SV=2	4	24	4	12.38	1.024	0.427	0.692	0.03	-1.23	-0.53	127.3	130.3	54.3	88.1	629.957	59.888	4
O94772	Lymphocyte antigen 6H OS=Homo sapiens GN=LY6H PE=2 SV=1	4	7	4	14.659	1.528	1.295	1.046	0.61	0.37	0.07	82.2	125.5	106.4	85.9	1.783	24.7338	4
Q14118	Dystroglycan OS=Homo sapiens GN=DAG1 PE=1 SV=2	4	8	4	97.381	0.529	0.502	0.768	-0.92	-0.99	-0.38	142.9	75.7	71.7	109.7	0.38	23.5637	4
P16402	Histone H1.3 OS=Homo sapiens GN=HIST1H1D PE=1 SV=2	4	5	4	22.336	0.373	0.364	0.389	-1.42	-1.46	-1.36	188.1	70.1	68.5	73.2	1.424	17.8479	4
P23284	Peptidyl-prolyl cis-trans isomerase B OS=Homo sapiens GN=PPIB PE=1 SV=2	4	4	4	23.728	0.27	0.336	0.831	-1.89	-1.57	-0.27	164.1	44.4	55.2	136.4	0.778	13.4776	4
Q8N126	Cell adhesion molecule 3 OS=Homo sapiens GN=CADM3 PE=1 SV=1	4	6	4	43.273	1.108	0.878	1.264	0.15	-0.19	0.34	94.1	104.3	82.6	119	0.719	12.4135	4
O95998	Interleukin-18-binding protein OS=Homo sapiens GN=IL18BP PE=1 SV=2	4	23	4	21.086	0.349	0.315	0.769	-1.52	-1.66	-0.38	164.4	57.4	51.9	126.4	5.31	68.4783	4
O60279	Sushi domain-containing protein 5 OS=Homo sapiens GN=SUSD5 PE=1 SV=3	4	10	4	67.978	1.642	1.485	1.227	0.72	0.57	0.29	74.7	122.7	111	91.6	0.585	35.9502	4
Q99584	Protein S100-A13 OS=Homo sapiens GN=S100A13 PE=1 SV=1	4	5	4	11.464	0.57	0.528	0.745	-0.81	-0.92	-0.42	140.7	80.2	74.3	104.9	2.728	15.8595	4
P16444	Dipeptidase 1 OS=Homo sapiens GN=DPEP1 PE=1 SV=3	4	4	4	45.645	0.338	0.355	1.029	-1.57	-1.49	0.04	146.9	49.6	52.2	151.2	0.468	12.278	4
P09237	Matrilysin OS=Homo sapiens GN=MMP7 PE=1 SV=1	4	12	4	29.658	0.45	0.339	0.562	-1.15	-1.56	-0.83	170.1	76.5	57.7	95.6	1.894	27.8418	4
Q13873	Bone morphogenetic protein receptor type-2 OS=Homo sapiens GN=BMPR2 PE=1 SV=2	4	8	4	115.129	1.514	0.904	1.277	0.6	-0.15	0.35	85.2	129	77	108.8	0.212	27.5379	4
P07307	Asialoglycoprotein receptor 2 OS=Homo sapiens GN=ASGR2 PE=1 SV=2	4	10	4	35.07	1.175	1.471	0.912	0.23	0.56	-0.13	87.8	103.1	129.1	80	1.448	28.0858	4
P43251	Biotinidase OS=Homo sapiens GN=BTD PE=1 SV=2	4	16	4	61.093	0.655	0.897	1.058	-0.61	-0.16	0.08	110.8	72.6	99.4	117.2	1.154	38.762	4
Q16849	Receptor-type tyrosine-protein phosphatase-like N OS=Homo sapiens GN=PTPRN PE=1 SV=1	4	11	4	105.781	0.989	0.765	0.818	-0.02	-0.39	-0.29	112	110.7	85.7	91.6	0.359	35.7562	4
P18510	Interleukin-1 receptor antagonist protein OS=Homo sapiens GN=IL1RN PE=1 SV=1	4	9	4	20.042	1.051	0.782	0.911	0.07	-0.35	-0.13	106.8	112.3	83.6	97.3	3.642	23.4857	4
P06276	Cholinesterase OS=Homo sapiens GN=BCHE PE=1 SV=1	4	5	4	68.374	0.965	1.509	0.726	-0.05	0.59	-0.46	95.2	91.9	143.7	69.1	0.417	11.2497	4
P22692	Insulin-like growth factor-binding protein 4 OS=Homo sapiens GN=IGFBP4 PE=1 SV=2	4	8	4	27.915	1.051	1.272	0.865	0.07	0.35	-0.21	95.5	100.4	121.5	82.6	1.371	34.7769	4
P26447	Protein S100-A4 OS=Homo sapiens GN=S100A4 PE=1 SV=1	4	16	4	11.721	0.801	0.334	0.387	-0.32	-1.58	-1.37	158.6	127	53	61.4	9	46.1694	4
Q8N307	Mucin-20 OS=Homo sapiens GN=MUC20 PE=1 SV=3	4	5	4	71.938	0.803	0.594	0.944	-0.32	-0.75	-0.08	119.7	96.1	71.1	113	0.346	18.6817	4
Q10588	ADP-ribosyl cyclase 2 OS=Homo sapiens GN=BST1 PE=1 SV=2	4	15	4	35.701	0.475	0.491	1.231	-1.07	-1.03	0.3	125.1	59.4	61.4	154.1	2.162	53.5592	4
P11684	Uteroglobin OS=Homo sapiens GN=SCGB1A1 PE=1 SV=1	4	27	4	9.987	1.526	2.847	1.237	0.61	1.51	0.31	60.5	92.4	172.3	74.9	99	99.5301	4
Q13145	BMP and activin membrane-bound inhibitor homolog OS=Homo sapiens GN=BAMBI PE=1 SV=1	4	10	4	29.088	1.6	1.102	0.907	0.68	0.14	-0.14	86.8	138.9	95.6	78.7	1.512	27.2922	4
Q8N114	Protein shisa-5 OS=Homo sapiens GN=SHISA5 PE=2 SV=1	4	9	4	25.564	1.39	1.435	1.193	0.47	0.52	0.26	79.7	110.8	114.4	95.1	12.895	30.0799	4
Q96HD1	Cysteine-rich with EGF-like domain protein 1 OS=Homo sapiens GN=CRELD1 PE=1 SV=3	4	7	4	45.409	1.071	1.189	1.007	0.1	0.25	0.01	93.7	100.4	111.5	94.4	1.015	19.435	4
Q9H1U4	Multiple epidermal growth factor-like domains protein 9 OS=Homo sapiens GN=MEGF9 PE=2 SV=3	4	8	4	62.943	1.393	0.815	1.013	0.48	-0.3	0.02	94.7	132	77.2	96	0.823	24.9032	4
Q08629	Testican-1 OS=Homo sapiens GN=SPOCK1 PE=1 SV=1	4	5	4	49.092	0.779	0.767	0.789	-0.36	-0.38	-0.34	119.9	93.5	92	94.6	0.585	16.7731	4
P13284	Gamma-interferon-inducible lysosomal thiol reductase OS=Homo sapiens GN=IFI30 PE=1 SV=3	4	16	4	27.945	1.614	1.489	1.277	0.69	0.57	0.35	74.4	120	110.7	95	9	52.3328	4
P17936	Insulin-like growth factor-binding protein 3 OS=Homo sapiens GN=IGFBP3 PE=1 SV=2	4	15	4	31.654	1.119	1.384	0.866	0.16	0.47	-0.21	91.5	102.5	126.7	79.3	0.931	60.2757	4
P07108	Acyl-CoA-binding protein OS=Homo sapiens GN=DBI PE=1 SV=2	4	23	4	10.038	1.253	0.972	0.957	0.33	-0.04	-0.06	95.6	119.9	93	91.5	397.107	79.2072	4
P11279	Lysosome-associated membrane glycoprotein 1 OS=Homo sapiens GN=LAMP1 PE=1 SV=3	4	20	4	44.854	1.582	1.275	1.094	0.66	0.35	0.13	80.8	127.9	103	88.4	1.015	56.0257	4
P15311	Ezrin OS=Homo sapiens GN=EZR PE=1 SV=4	9	12	4	69.37	0.725	0.556	0.755	-0.46	-0.85	-0.41	131.7	95.5	73.3	99.4	0.805	40.816	9
P49908	Selenoprotein P OS=Homo sapiens GN=SEPP1 PE=1 SV=3	4	5	4	43.156	1.263	1.782	1.056	0.34	0.83	0.08	78.4	99	139.7	82.8	0.52	13.2525	4
O95274	Ly6/PLAUR domain-containing protein 3 OS=Homo sapiens GN=LYPD3 PE=1 SV=2	4	6	4	35.948	1.333	0.698	1.065	0.41	-0.52	0.09	97.7	130.2	68.2	104	0.551	23.3544	4
P04792	Heat shock protein beta-1 OS=Homo sapiens GN=HSPB1 PE=1 SV=2	4	8	4	22.768	0.629	0.64	0.766	-0.67	-0.64	-0.38	131.8	82.9	84.3	101	1.894	24.7942	4
P08758	Annexin A5 OS=Homo sapiens GN=ANXA5 PE=1 SV=2	4	6	4	35.914	1.16	1.132	0.552	0.21	0.18	-0.86	104.1	120.7	117.7	57.5	0.425	10.5568	4
P21802	Fibroblast growth factor receptor 2 OS=Homo sapiens GN=FGFR2 PE=1 SV=1	4	5	4	91.966	0.697	0.623	0.874	-0.52	-0.68	-0.19	125.2	87.3	78.1	109.4	0.315	16.4116	4
Q9HCN6	Platelet glycoprotein VI OS=Homo sapiens GN=GP6 PE=1 SV=4	4	13	4	36.843	1.005	0.818	1.046	0.01	-0.29	0.07	103.4	103.9	84.6	108.2	3.217	35.8298	4
O75594	Peptidoglycan recognition protein 1 OS=Homo sapiens GN=PGLYRP1 PE=1 SV=1	4	24	4	21.717	0.582	0.519	0.963	-0.78	-0.95	-0.05	130.5	76	67.7	125.8	7.111	78.48	4
P29323	Ephrin type-B receptor 2 OS=Homo sapiens GN=EPHB2 PE=1 SV=5	4	4	4	117.417	0.967	0.964	0.929	-0.05	-0.05	-0.11	103.6	100.2	99.9	96.2	0.179	10.4887	4
Q5IJ48	Crumbs homolog 2 OS=Homo sapiens GN=CRB2 PE=1 SV=2	4	4	4	134.176	0.708	0.673	1.127	-0.5	-0.57	0.17	114	80.7	76.8	128.5	0.186	13.0148	4
Q6GTX8	Leukocyte-associated immunoglobulin-like receptor 1 OS=Homo sapiens GN=LAIR1 PE=1 SV=1	5	34	4	31.393	1.482	0.841	1.271	0.57	-0.25	0.35	87.1	129	73.3	110.7	11.328	103.826	5
P58499	Protein FAM3B OS=Homo sapiens GN=FAM3B PE=1 SV=2	4	6	4	25.965	0.551	0.567	0.711	-0.86	-0.82	-0.49	141.4	77.9	80.2	100.5	1.371	16.3127	4
O00592	Podocalyxin OS=Homo sapiens GN=PODXL PE=1 SV=2	4	6	4	58.599	0.251	0.371	1.466	-1.99	-1.43	0.55	129.5	32.5	48	189.9	0.778	20.3229	4
Q92496	Complement factor H-related protein 4 OS=Homo sapiens GN=CFHR4 PE=1 SV=2	4	14	4	37.274	1.025	2.285	0.821	0.04	1.19	-0.28	78	79.9	178.1	64	3.125	42.9664	4
Q6UXG3	CMRF35-like molecule 9 OS=Homo sapiens GN=CD300LG PE=1 SV=2	4	42	4	36.037	0.743	0.55	1.173	-0.43	-0.86	0.23	115.4	85.7	63.5	135.4	7.377	117.719	4
Q99988	Growth/differentiation factor 15 OS=Homo sapiens GN=GDF15 PE=1 SV=3	4	8	4	34.119	1.271	1.13	1.28	0.35	0.18	0.36	85.5	108.6	96.5	109.4	1.448	26.6542	4
P27918	Properdin OS=Homo sapiens GN=CFP PE=1 SV=2	4	7	4	51.242	2.635	1.985	0.871	1.4	0.99	-0.2	61.6	162.4	122.3	53.6	0.616	21.9025	4
P05546	Heparin cofactor 2 OS=Homo sapiens GN=SERPIND1 PE=1 SV=3	4	10	4	57.034	1.36	1.389	0.795	0.44	0.47	-0.33	88	119.7	122.3	70	0.562	22.2937	4
Q9HD89	Resistin OS=Homo sapiens GN=RETN PE=2 SV=1	4	14	4	11.411	1.173	0.759	0.705	0.23	-0.4	-0.5	110	129	83.5	77.5	9	46.6454	4
O00187	Mannan-binding lectin serine protease 2 OS=Homo sapiens GN=MASP2 PE=1 SV=4	4	17	4	75.654	0.393	0.373	0.901	-1.35	-1.42	-0.15	150	58.9	56	135.1	0.301	56.8341	4
P19256	Lymphocyte function-associated antigen 3 OS=Homo sapiens GN=CD58 PE=1 SV=1	4	14	4	28.129	0.865	0.838	0.806	-0.21	-0.26	-0.31	114	98.7	95.5	91.8	7.111	38.1771	4
Q9HB40	Retinoid-inducible serine carboxypeptidase OS=Homo sapiens GN=SCPEP1 PE=1 SV=1	4	5	4	50.798	0.945	0.416	0.54	-0.08	-1.27	-0.89	137.9	130.3	57.3	74.4	0.65	16.6805	4
P09486	SPARC OS=Homo sapiens GN=SPARC PE=1 SV=1	4	12	4	34.61	0.838	0.722	0.813	-0.25	-0.47	-0.3	118.6	99.4	85.6	96.4	1.512	19.2278	4
Q9BX67	Junctional adhesion molecule C OS=Homo sapiens GN=JAM3 PE=1 SV=1	4	10	4	34.998	1.123	0.826	1.008	0.17	-0.28	0.01	101.1	113.5	83.5	101.9	1.239	24.0503	4
P22792	Carboxypeptidase N subunit 2 OS=Homo sapiens GN=CPN2 PE=1 SV=3	4	12	4	60.518	0.507	0.637	0.568	-0.98	-0.65	-0.82	147.5	74.8	93.9	83.8	0.957	37.1761	4
Q06323	Proteasome activator complex subunit 1 OS=Homo sapiens GN=PSME1 PE=1 SV=1	4	5	4	28.705	0.585	0.719	0.611	-0.77	-0.48	-0.71	137.2	80.2	98.7	83.9	0.833	16.7884	4
Q8IZA0	Dyslexia-associated protein KIAA0319-like protein OS=Homo sapiens GN=KIAA0319L PE=1 SV=2	4	7	4	115.586	0.835	0.712	0.786	-0.26	-0.49	-0.35	120	100.2	85.5	94.3	0.222	22.3748	4
Q9NNX6	CD209 antigen OS=Homo sapiens GN=CD209 PE=1 SV=1	4	6	4	45.746	1.415	1.862	1.614	0.5	0.9	0.69	67.9	96.1	126.4	109.6	0.557	25.5707	4
P08670	Vimentin OS=Homo sapiens GN=VIM PE=1 SV=4	5	7	4	53.619	0.64	0.355	0.39	-0.64	-1.5	-1.36	167.7	107.3	59.5	65.5	0.501	21.4262	5
Q9Y653	G-protein coupled receptor 56 OS=Homo sapiens GN=GPR56 PE=1 SV=2	4	9	4	77.688	0.538	0.533	0.66	-0.9	-0.91	-0.6	146.5	78.8	78.1	96.6	0.778	32.5014	4
Q14314	Fibroleukin OS=Homo sapiens GN=FGL2 PE=1 SV=1	5	9	4	50.197	1.365	1.28	0.928	0.45	0.36	-0.11	87.5	119.3	112	81.2	0.562	24.1252	5
Q7LBR1	Charged multivesicular body protein 1b OS=Homo sapiens GN=CHMP1B PE=1 SV=1	4	5	4	22.095	0.303	0.398	0.569	-1.72	-1.33	-0.81	176.2	53.3	70.2	100.3	1.848	15.113	4
Q16363	Laminin subunit alpha-4 OS=Homo sapiens GN=LAMA4 PE=1 SV=4	4	5	4	202.397	1.619	1.072	0.923	0.69	0.1	-0.12	86.7	140.4	92.9	80	0.085	16.205	4
Q9Y6Q6	Tumor necrosis factor receptor superfamily member 11A OS=Homo sapiens GN=TNFRSF11A PE=1 SV=1	4	7	4	65.991	1.643	1.071	0.957	0.72	0.1	-0.06	85.6	140.7	91.7	81.9	0.45	33.6995	4
O43493	Trans-Golgi network integral membrane protein 2 OS=Homo sapiens GN=TGOLN2 PE=1 SV=2	4	6	4	51.082	0.868	0.551	0.499	-0.2	-0.86	-1	137.1	119	75.5	68.4	0.585	22.5829	4
P01040	Cystatin-A OS=Homo sapiens GN=CSTA PE=1 SV=1	4	10	4	11	1.378	1.287	0.954	0.46	0.36	-0.07	86.6	119.3	111.5	82.6	6.197	28.9755	4
P01031	Complement C5 OS=Homo sapiens GN=C5 PE=1 SV=4	4	10	4	188.186	1.412	3.602	0.819	0.5	1.85	-0.29	58.5	82.7	210.9	47.9	0.202	37.6573	4
Q9UNW1	Multiple inositol polyphosphate phosphatase 1 OS=Homo sapiens GN=MINPP1 PE=1 SV=1	4	5	4	55.016	0.896	1.091	0.957	-0.16	0.13	-0.06	101.4	90.9	110.7	97.1	0.389	12.1237	4
P01877	Ig alpha-2 chain C region OS=Homo sapiens GN=IGHA2 PE=1 SV=3	11	60	4	36.503	1.062	1.225	0.791	0.09	0.29	-0.34	98.1	104.1	120.2	77.6	75.27	185.67	11
Q14520	Hyaluronan-binding protein 2 OS=Homo sapiens GN=HABP2 PE=1 SV=1	4	8	4	62.63	1.017	2.13	0.996	0.02	1.09	-0.01	77.8	79.1	165.7	77.5	0.557	24.892	4
P0DJD8	Pepsin A-3 OS=Homo sapiens GN=PGA3 PE=1 SV=1	4	22	4	41.95	0.872	0.98	1.356	-0.2	-0.03	0.44	95.1	82.9	93.1	128.9	14.849	54.2794	4
P02042	Hemoglobin subunit delta OS=Homo sapiens GN=HBD PE=1 SV=2	9	81	4	16.045	0.223	0.351	0.329	-2.16	-1.51	-1.6	210.2	46.9	73.7	69.2	150.991	318.284	9
O15393	Transmembrane protease serine 2 OS=Homo sapiens GN=TMPRSS2 PE=1 SV=3	4	5	4	53.824	1.108	0.753	1.165	0.15	-0.41	0.22	99.3	110	74.9	115.8	0.585	14.1713	4
Q96AP7	Endothelial cell-selective adhesion molecule OS=Homo sapiens GN=ESAM PE=1 SV=1	4	8	4	41.151	1.789	1.972	1.477	0.84	0.98	0.56	64.1	114.7	126.4	94.7	0.931	31.6563	4
P30740	Leukocyte elastase inhibitor OS=Homo sapiens GN=SERPINB1 PE=1 SV=1	4	6	4	42.715	2.664	1.608	0.874	1.41	0.69	-0.19	65.1	173.4	104.7	56.9	0.65	19.9383	4
P18206	Vinculin OS=Homo sapiens GN=VCL PE=1 SV=4	4	5	4	123.722	2.744	1.12	1.227	1.46	0.16	0.3	65.7	180.2	73.6	80.6	0.147	17.4197	4
Q9NS68	Tumor necrosis factor receptor superfamily member 19 OS=Homo sapiens GN=TNFRSF19 PE=1 SV=1	4	6	4	45.985	2.088	1.572	1.143	1.06	0.65	0.19	68.9	143.9	108.4	78.8	0.896	19.2591	4
Q92692	Poliovirus receptor-related protein 2 OS=Homo sapiens GN=PVRL2 PE=1 SV=1	4	7	4	57.706	0.479	0.425	0.945	-1.06	-1.24	-0.08	140.4	67.2	59.6	132.7	0.509	21.0788	4
Q92876	Kallikrein-6 OS=Homo sapiens GN=KLK6 PE=1 SV=1	4	4	4	26.838	1.148	1.805	1.015	0.2	0.85	0.02	80.5	92.4	145.4	81.7	0.848	13.1218	4
Q15848	Adiponectin OS=Homo sapiens GN=ADIPOQ PE=1 SV=1	4	17	4	26.397	1.542	1.955	0.799	0.62	0.97	-0.32	75.5	116.5	147.6	60.4	2.831	32.6589	4
P01871	Ig mu chain C region OS=Homo sapiens GN=IGHM PE=1 SV=3	4	5	4	49.276	0.613	0.682	0.614	-0.71	-0.55	-0.7	137.5	84.3	93.8	84.4	0.487	12.5017	4
P23470	Receptor-type tyrosine-protein phosphatase gamma OS=Homo sapiens GN=PTPRG PE=1 SV=4	4	9	4	161.901	0.778	0.858	0.832	-0.36	-0.22	-0.27	115.4	89.8	98.9	95.9	0.199	31.0352	4
Q03405	Urokinase plasminogen activator surface receptor OS=Homo sapiens GN=PLAUR PE=1 SV=1	4	8	4	36.953	1.972	0.937	0.936	0.98	-0.09	-0.1	82.6	162.8	77.3	77.3	1.154	29.5475	4
O95633	Follistatin-related protein 3 OS=Homo sapiens GN=FSTL3 PE=1 SV=1	4	5	4	27.645	1.414	1.61	1.036	0.5	0.69	0.05	79	111.8	127.2	81.9	1.61	17.6908	4
Q86SQ4	G-protein coupled receptor 126 OS=Homo sapiens GN=GPR126 PE=1 SV=3	4	6	4	136.607	1.009	1.118	0.758	0.01	0.16	-0.4	103	103.9	115.1	78	0.28	17.192	4
P35613	Basigin OS=Homo sapiens GN=BSG PE=1 SV=2	4	6	4	42.174	0.813	0.885	0.821	-0.3	-0.18	-0.28	113.7	92.3	100.6	93.4	0.778	14.0666	4
Q92956	Tumor necrosis factor receptor superfamily member 14 OS=Homo sapiens GN=TNFRSF14 PE=1 SV=3	4	41	4	30.372	1.821	1.255	1.108	0.87	0.33	0.15	77.2	140.5	96.8	85.5	23.245	105.806	4
O14798	Tumor necrosis factor receptor superfamily member 10C OS=Homo sapiens GN=TNFRSF10C PE=1 SV=3	4	4	4	27.389	2.869	1.035	0.709	1.52	0.05	-0.5	71.3	204.4	73.8	50.5	2.728	8.83556	4
Q68D85	Natural cytotoxicity triggering receptor 3 ligand 1 OS=Homo sapiens GN=NCR3LG1 PE=1 SV=1	3	3	3	50.795	0.227	0.339	0.706	-2.14	-1.56	-0.5	176	40	59.7	124.3	0.304	9.50966	3
P80370	Protein delta homolog 1 OS=Homo sapiens GN=DLK1 PE=1 SV=3	3	17	3	41.272	2.353	1.562	1.877	1.23	0.64	0.91	58.9	138.6	92	110.5	1.448	60.7401	3
P07225	Vitamin K-dependent protein S OS=Homo sapiens GN=PROS1 PE=1 SV=1	3	5	3	75.074	1.363	1.98	1.003	0.45	0.99	0	74.8	102	148.1	75	0.184	9.97215	3
Q9UGT4	Sushi domain-containing protein 2 OS=Homo sapiens GN=SUSD2 PE=1 SV=1	3	4	3	90.15	0.668	0.565	0.654	-0.58	-0.82	-0.61	138.6	92.5	78.2	90.6	0.266	13.1948	3
P68036	Ubiquitin-conjugating enzyme E2 L3 OS=Homo sapiens GN=UBE2L3 PE=1 SV=1	3	3	3	17.85	0.418	0.392	0.453	-1.26	-1.35	-1.14	176.7	73.9	69.3	80	1.371	9.46713	3
P49788	Retinoic acid receptor responder protein 1 OS=Homo sapiens GN=RARRES1 PE=2 SV=2	3	3	3	33.264	0.547	0.532	0.999	-0.87	-0.91	0	130	71.1	69.1	129.8	0.54	8.90533	3
Q16832	Discoidin domain-containing receptor 2 OS=Homo sapiens GN=DDR2 PE=1 SV=2	3	3	3	96.674	0.701	0.725	0.875	-0.51	-0.46	-0.19	121.2	85	87.8	106	0.199	9.80945	3
P09619	Platelet-derived growth factor receptor beta OS=Homo sapiens GN=PDGFRB PE=1 SV=1	3	4	3	123.889	0.496	0.445	0.863	-1.01	-1.17	-0.21	142.7	70.7	63.5	123.1	0.198	13.4808	3
P17050	Alpha-N-acetylgalactosaminidase OS=Homo sapiens GN=NAGA PE=1 SV=2	3	9	3	46.534	0.668	0.591	1.216	-0.58	-0.76	0.28	115.1	76.9	68	140	0.52	24.9775	3
P11362	Fibroblast growth factor receptor 1 OS=Homo sapiens GN=FGFR1 PE=1 SV=3	3	7	3	91.809	0.5	0.562	0.854	-1	-0.83	-0.23	137.2	68.6	77.1	117.1	0.274	21.6939	3
P23471	Receptor-type tyrosine-protein phosphatase zeta OS=Homo sapiens GN=PTPRZ1 PE=1 SV=4	3	4	3	254.429	0.456	0.527	0.701	-1.13	-0.93	-0.51	149	68	78.5	104.4	0.072	12.229	3
P31948	Stress-induced-phosphoprotein 1 OS=Homo sapiens GN=STIP1 PE=1 SV=1	3	3	3	62.599	0.406	0.377	0.544	-1.3	-1.41	-0.88	171.9	69.7	64.8	93.6	0.17	10.5264	3
P13473	Lysosome-associated membrane glycoprotein 2 OS=Homo sapiens GN=LAMP2 PE=1 SV=2	3	18	3	44.932	1.071	0.96	0.903	0.1	-0.06	-0.15	101.7	108.9	97.6	91.8	0.688	48.9737	3
P01861	Ig gamma-4 chain C region OS=Homo sapiens GN=IGHG4 PE=1 SV=1	9	84	3	35.918	0.982	2.156	0.833	-0.03	1.11	-0.26	80.5	79.1	173.4	67.1	62.096	231.723	9
Q9NZH0	G-protein coupled receptor family C group 5 member B OS=Homo sapiens GN=GPRC5B PE=2 SV=2	3	4	3	44.766	0.877	0.819	0.696	-0.19	-0.29	-0.52	117.9	103.4	96.6	82	0.848	11.8936	3
Q6UXB4	C-type lectin domain family 4 member G OS=Homo sapiens GN=CLEC4G PE=1 SV=1	3	12	3	32.541	0.892	0.909	0.686	-0.16	-0.14	-0.54	114.7	102.3	104.2	78.7	1.054	24.5244	3
Q96JQ0	Protocadherin-16 OS=Homo sapiens GN=DCHS1 PE=2 SV=1	3	5	3	345.971	0.848	0.724	0.671	-0.24	-0.47	-0.58	123.3	104.6	89.3	82.7	0.087	18.0094	3
P02533	Keratin, type I cytoskeletal 14 OS=Homo sapiens GN=KRT14 PE=1 SV=4	12	26	3	51.529	1.403	2.082	0.901	0.49	1.06	-0.15	74.3	104.2	154.6	66.9	1.512	80.3599	12
P78324	Tyrosine-protein phosphatase non-receptor type substrate 1 OS=Homo sapiens GN=SIRPA PE=1 SV=2	15	80	3	54.933	1.221	0.814	0.996	0.29	-0.3	-0.01	99.2	121.1	80.8	98.8	7.003	287.876	15
Q9Y6X5	Ectonucleotide pyrophosphatase/phosphodiesterase family member 4 OS=Homo sapiens GN=ENPP4 PE=1 SV=3	3	3	3	51.608	0.604	0.411	1.409	-0.73	-1.28	0.49	116.9	70.5	48	164.6	0.318	10.1853	3
O95336	6-phosphogluconolactonase OS=Homo sapiens GN=PGLS PE=1 SV=2	3	3	3	27.53	0.674	0.898	0.801	-0.57	-0.15	-0.32	118.6	79.9	106.5	95	0.585	11.4277	3
Q9Y4D7	Plexin-D1 OS=Homo sapiens GN=PLXND1 PE=1 SV=3	3	3	3	211.871	1.509	0.952	1.158	0.59	-0.07	0.21	86.6	130.7	82.4	100.3	0.071	9.87403	3
Q13291	Signaling lymphocytic activation molecule OS=Homo sapiens GN=SLAMF1 PE=1 SV=1	3	3	3	37.207	0.704	0.773	0.892	-0.51	-0.37	-0.16	118.7	83.6	91.8	105.9	0.501	9.50439	3
Q09666	Neuroblast differentiation-associated protein AHNAK OS=Homo sapiens GN=AHNAK PE=1 SV=2	3	6	3	628.699	0.719	0.806	0.69	-0.48	-0.31	-0.54	124.4	89.5	100.3	85.8	0.011	9.23073	3
P22304	Iduronate 2-sulfatase OS=Homo sapiens GN=IDS PE=1 SV=1	3	6	3	61.834	0.995	0.749	1.013	-0.01	-0.42	0.02	106.5	105.9	79.7	107.9	0.688	17.7716	3
Q9H461	Frizzled-8 OS=Homo sapiens GN=FZD8 PE=1 SV=1	3	7	3	73.252	1.484	1.213	1.263	0.57	0.28	0.34	80.7	119.7	97.8	101.8	0.453	19.34	3
Q8IWT1	Sodium channel subunit beta-4 OS=Homo sapiens GN=SCN4B PE=1 SV=1	3	5	3	24.953	2.472	2.196	1.981	1.31	1.13	0.99	52.3	129.3	114.8	103.6	0.638	15.1625	3
Q9UM22	Mammalian ependymin-related protein 1 OS=Homo sapiens GN=EPDR1 PE=1 SV=2	3	4	3	25.421	1.221	1.164	1.097	0.29	0.22	0.13	89.2	109	103.9	97.9	0.778	12.9069	3
P06753	Tropomyosin alpha-3 chain OS=Homo sapiens GN=TPM3 PE=1 SV=1	6	10	3	32.799	1.34	0.69	0.584	0.42	-0.53	-0.78	110.7	148.3	76.4	64.7	0.65	33.2453	6
P08637	Low affinity immunoglobulin gamma Fc region receptor III-A OS=Homo sapiens GN=FCGR3A PE=1 SV=2	7	28	3	29.071	0.244	0.271	0.651	-2.04	-1.88	-0.62	184.7	45	50	120.3	5.813	82.8587	7
P25774	Cathepsin S OS=Homo sapiens GN=CTSS PE=1 SV=3	3	4	3	37.471	1.235	0.96	0.979	0.3	-0.06	-0.03	95.8	118.3	92	93.8	0.551	12.5151	3
Q9Y4C0	Neurexin-3-alpha OS=Homo sapiens GN=NRXN3 PE=1 SV=4	3	3	3	180.484	0.451	0.453	0.662	-1.15	-1.14	-0.6	155.9	70.2	70.7	103.2	0.09	7.58996	3
P67936	Tropomyosin alpha-4 chain OS=Homo sapiens GN=TPM4 PE=1 SV=3	5	10	3	28.504	0.677	0.542	0.432	-0.56	-0.88	-1.21	150.8	102.2	81.8	65.2	1.154	33.5588	5
P30043	Flavin reductase (NADPH) OS=Homo sapiens GN=BLVRB PE=1 SV=3	3	7	3	22.105	0.384	0.399	0.352	-1.38	-1.32	-1.51	187.4	71.9	74.8	65.9	3.329	24.3363	3
Q96DA0	Zymogen granule protein 16 homolog B OS=Homo sapiens GN=ZG16B PE=1 SV=3	3	4	3	22.725	0.471	0.463	0.463	-1.08	-1.11	-1.11	166.9	78.7	77.2	77.3	0.701	14.7469	3
Q9Y5Z4	Heme-binding protein 2 OS=Homo sapiens GN=HEBP2 PE=1 SV=1	3	3	3	22.861	0.835	0.743	0.65	-0.26	-0.43	-0.62	124	103.5	92	80.5	0.995	8.07788	3
P60709	Actin, cytoplasmic 1 OS=Homo sapiens GN=ACTB PE=1 SV=1	3	4	3	41.71	0.498	0.478	0.52	-1.01	-1.06	-0.94	160.3	79.8	76.6	83.3	0.35	12.0173	3
P00742	Coagulation factor X OS=Homo sapiens GN=F10 PE=1 SV=2	3	3	3	54.697	2.035	2.932	0.858	1.02	1.55	-0.22	58.6	119.3	171.8	50.3	0.269	8.70439	3
P10646	Tissue factor pathway inhibitor OS=Homo sapiens GN=TFPI PE=1 SV=1	3	13	3	34.992	1.29	0.805	1.077	0.37	-0.31	0.11	95.9	123.7	77.2	103.3	1.512	38.7675	3
A6NI73	Leukocyte immunoglobulin-like receptor subfamily A member 5 OS=Homo sapiens GN=LILRA5 PE=1 SV=1	3	4	3	32.734	0.388	0.357	0.799	-1.37	-1.48	-0.32	157.2	60.9	56.2	125.7	1.031	11.759	3
Q9UPZ6	Thrombospondin type-1 domain-containing protein 7A OS=Homo sapiens GN=THSD7A PE=1 SV=4	3	4	3	185.241	0.965	0.802	0.894	-0.05	-0.32	-0.16	109.3	105.5	87.6	97.7	0.077	15.2264	3
P52823	Stanniocalcin-1 OS=Homo sapiens GN=STC1 PE=1 SV=1	3	4	3	27.604	0.821	0.773	1.234	-0.28	-0.37	0.3	104.5	85.8	80.7	128.9	0.501	14.5846	3
P07358	Complement component C8 beta chain OS=Homo sapiens GN=C8B PE=1 SV=3	3	7	3	67.003	1.445	2.922	1.127	0.53	1.55	0.17	61.6	89	180	69.4	0.45	16.4608	3
P80748	Ig lambda chain V-III region LOI OS=Homo sapiens PE=1 SV=1	3	11	3	11.928	0.746	1.383	0.774	-0.42	0.47	-0.37	102.5	76.4	141.7	79.4	3.642	36.0803	3
P62937	Peptidyl-prolyl cis-trans isomerase A OS=Homo sapiens GN=PPIA PE=1 SV=2	3	3	3	18.001	0.148	0.289	0.341	-2.76	-1.79	-1.55	225.1	33.3	65	76.7	0.638	9.39499	3
P00995	Pancreatic secretory trypsin inhibitor OS=Homo sapiens GN=SPINK1 PE=1 SV=2	3	5	3	8.501	1.11	1.052	0.704	0.15	0.07	-0.51	103.5	114.9	108.8	72.8	4.623	20.1684	3
P52565	Rho GDP-dissociation inhibitor 1 OS=Homo sapiens GN=ARHGDIA PE=1 SV=3	3	4	3	23.193	0.547	0.636	0.67	-0.87	-0.65	-0.58	140.2	76.7	89.2	93.9	0.638	10.0006	3
O14594	Neurocan core protein OS=Homo sapiens GN=NCAN PE=2 SV=3	3	4	3	143.003	0.558	0.346	0.928	-0.84	-1.53	-0.11	141.3	78.8	48.9	131.1	0.207	10.9011	3
Q14982	Opioid-binding protein/cell adhesion molecule OS=Homo sapiens GN=OPCML PE=1 SV=1	4	15	3	37.983	0.635	0.447	0.822	-0.66	-1.16	-0.28	137.8	87.5	61.6	113.2	1.31	47.2174	4
O00244	Copper transport protein ATOX1 OS=Homo sapiens GN=ATOX1 PE=1 SV=1	3	6	3	7.397	0.463	0.556	0.964	-1.11	-0.85	-0.05	134.1	62.1	74.6	129.2	9	20.82	3
Q9BRT3	Migration and invasion enhancer 1 OS=Homo sapiens GN=MIEN1 PE=1 SV=1	3	9	3	12.395	0.806	0.699	0.819	-0.31	-0.52	-0.29	120.3	97	84.1	98.6	3.217	29.0613	3
Q9NZZ3	Charged multivesicular body protein 5 OS=Homo sapiens GN=CHMP5 PE=1 SV=1	3	6	3	24.555	0.636	0.802	0.582	-0.65	-0.32	-0.78	132.5	84.2	106.3	77	2.162	12.6883	3
Q8TDQ1	CMRF35-like molecule 1 OS=Homo sapiens GN=CD300LF PE=1 SV=3	3	4	3	32.314	0.89	0.792	1.525	-0.17	-0.34	0.61	95.1	84.6	75.3	145	1.154	12.2758	3
Q9HAV5	Tumor necrosis factor receptor superfamily member 27 OS=Homo sapiens GN=EDA2R PE=1 SV=2	3	5	3	32.737	1.163	1.032	0.788	0.22	0.05	-0.34	100.4	116.8	103.6	79.1	1.154	8.86209	3
P09923	Intestinal-type alkaline phosphatase OS=Homo sapiens GN=ALPI PE=1 SV=2	3	4	3	56.776	0.928	0.779	2.18	-0.11	-0.36	1.12	81.8	76	63.8	178.4	0.445	14.287	3
Q92563	Testican-2 OS=Homo sapiens GN=SPOCK2 PE=1 SV=1	3	5	3	46.749	0.828	0.612	1.028	-0.27	-0.71	0.04	115.3	95.5	70.6	118.6	0.35	17.8545	3
Q9H8L6	Multimerin-2 OS=Homo sapiens GN=MMRN2 PE=1 SV=2	3	4	3	104.344	0.147	0.293	0.652	-2.77	-1.77	-0.62	191.2	28	56	124.8	0.19	14.007	3
P04746	Pancreatic alpha-amylase OS=Homo sapiens GN=AMY2A PE=1 SV=2	20	226	3	57.67	0.812	0.371	0.666	-0.3	-1.43	-0.59	140.4	114	52.1	93.5	173.333	557.07	20
Q15293	Reticulocalbin-1 OS=Homo sapiens GN=RCN1 PE=1 SV=1	3	3	3	38.866	0.618	0.591	0.691	-0.69	-0.76	-0.53	137.9	85.2	81.5	95.4	0.54	9.71095	3
P52799	Ephrin-B2 OS=Homo sapiens GN=EFNB2 PE=1 SV=1	3	3	3	36.9	1.032	1.247	1.103	0.05	0.32	0.14	91.3	94.2	113.8	100.7	0.585	10.0597	3
Q9NZT1	Calmodulin-like protein 5 OS=Homo sapiens GN=CALML5 PE=1 SV=2	3	6	3	15.883	0.751	0.974	1.45	-0.41	-0.04	0.54	95.8	71.9	93.3	138.9	1.154	14.1457	3
Q07654	Trefoil factor 3 OS=Homo sapiens GN=TFF3 PE=1 SV=1	3	11	3	8.635	2.559	2.245	1.067	1.36	1.17	0.09	58.2	149	130.7	62.1	16.783	28.7012	3
P04745	Alpha-amylase 1 OS=Homo sapiens GN=AMY1A PE=1 SV=2	19	167	3	57.731	0.89	0.528	0.787	-0.17	-0.92	-0.35	124.8	111.1	65.9	98.2	91.612	455.376	19
O95967	EGF-containing fibulin-like extracellular matrix protein 2 OS=Homo sapiens GN=EFEMP2 PE=1 SV=3	3	4	3	49.372	0.81	1.221	0.733	-0.3	0.29	-0.45	106.3	86.1	129.7	77.9	0.492	12.9356	3
Q8NHJ6	Leukocyte immunoglobulin-like receptor subfamily B member 4 OS=Homo sapiens GN=LILRB4 PE=1 SV=3	3	4	3	49.325	0.589	0.535	0.914	-0.76	-0.9	-0.13	131.7	77.6	70.4	120.4	0.52	10.7182	3
Q13477	Mucosal addressin cell adhesion molecule 1 OS=Homo sapiens GN=MADCAM1 PE=1 SV=2	3	6	3	40.13	0.591	0.572	0.737	-0.76	-0.81	-0.44	137.9	81.5	78.9	101.7	0.778	24.7624	3
P09382	Galectin-1 OS=Homo sapiens GN=LGALS1 PE=1 SV=2	3	3	3	14.706	0.551	0.616	0.766	-0.86	-0.7	-0.38	136.4	75.1	84	104.5	1.154	10.3783	3
P17931	Galectin-3 OS=Homo sapiens GN=LGALS3 PE=1 SV=5	3	3	3	26.136	0.436	0.421	0.72	-1.2	-1.25	-0.47	155.2	67.6	65.3	111.8	0.874	9.68115	3
P04080	Cystatin-B OS=Homo sapiens GN=CSTB PE=1 SV=2	3	9	3	11.133	0.407	0.396	0.597	-1.3	-1.34	-0.74	166.7	67.8	66	99.5	9	29.1838	3
P48061	Stromal cell-derived factor 1 OS=Homo sapiens GN=CXCL12 PE=1 SV=1	3	5	3	10.659	0.213	0.202	0.338	-2.23	-2.31	-1.56	228.2	48.7	46	77.2	5.31	14.8364	3
P46531	Neurogenic locus notch homolog protein 1 OS=Homo sapiens GN=NOTCH1 PE=1 SV=4	3	9	3	272.323	1.815	1.341	0.851	0.86	0.42	-0.23	79.9	145	107.1	68	0.173	24.1887	3
O75347	Tubulin-specific chaperone A OS=Homo sapiens GN=TBCA PE=1 SV=3	3	4	3	12.847	0.146	0.189	0.477	-2.78	-2.41	-1.07	220.9	32.2	41.7	105.3	1.683	11.8227	3
Q15375	Ephrin type-A receptor 7 OS=Homo sapiens GN=EPHA7 PE=1 SV=3	4	4	3	112.024	0.483	0.514	0.764	-1.05	-0.96	-0.39	144.8	70	74.5	110.7	0.169	12.9436	4
P22532	Small proline-rich protein 2D OS=Homo sapiens GN=SPRR2D PE=2 SV=2	3	6	3	7.9	1.505	1.034	2.653	0.59	0.05	1.41	64.6	97.2	66.8	171.4	5.813	17.2862	3
P09564	T-cell antigen CD7 OS=Homo sapiens GN=CD7 PE=1 SV=1	3	12	3	25.393	0.547	0.392	0.438	-0.87	-1.35	-1.19	168.2	92.1	66	73.7	3.642	43.2311	3
Q9NPF0	CD320 antigen OS=Homo sapiens GN=CD320 PE=1 SV=1	3	6	3	28.972	1.491	0.97	1.018	0.58	-0.04	0.03	89.3	133.1	86.6	90.9	1.31	21.6021	3
Q96DR8	Mucin-like protein 1 OS=Homo sapiens GN=MUCL1 PE=1 SV=1	3	12	3	9.034	1.612	0.799	1.278	0.69	-0.32	0.35	85.3	137.5	68.2	109	99	32.9302	3
Q13443	Disintegrin and metalloproteinase domain-containing protein 9 OS=Homo sapiens GN=ADAM9 PE=1 SV=1	3	5	3	90.497	0.257	0.247	0.566	-1.96	-2.02	-0.82	193.2	49.7	47.7	109.3	0.259	18.5218	3
P01037	Cystatin-SN OS=Homo sapiens GN=CST1 PE=1 SV=3	4	12	3	16.377	1.451	1.328	1.49	0.54	0.41	0.58	75.9	110.2	100.8	113.1	13.678	31.417	4
P41439	Folate receptor gamma OS=Homo sapiens GN=FOLR3 PE=1 SV=1	5	12	3	27.62	1.256	2.602	2.691	0.33	1.38	1.43	53	66.6	137.9	142.6	2.415	37.5649	5
Q99519	Sialidase-1 OS=Homo sapiens GN=NEU1 PE=1 SV=1	3	3	3	45.439	0.926	0.936	0.957	-0.11	-0.1	-0.06	104.7	97	98	100.3	0.35	7.88835	3
B9A064	Immunoglobulin lambda-like polypeptide 5 OS=Homo sapiens GN=IGLL5 PE=2 SV=2	6	72	3	23.049	0.868	1.497	0.709	-0.2	0.58	-0.5	98.2	85.2	147	69.6	30.623	251.404	6
Q9H6B4	CXADR-like membrane protein OS=Homo sapiens GN=CLMP PE=1 SV=1	3	4	3	41.255	1.243	1.146	0.929	0.31	0.2	-0.11	92.6	115.1	106.1	86.1	0.369	13.6536	3
P21709	Ephrin type-A receptor 1 OS=Homo sapiens GN=EPHA1 PE=1 SV=4	3	3	3	108.058	0.749	0.793	0.706	-0.42	-0.33	-0.5	123.2	92.2	97.7	86.9	0.139	10.4029	3
Q9Y4L1	Hypoxia up-regulated protein 1 OS=Homo sapiens GN=HYOU1 PE=1 SV=1	3	3	3	111.266	0.739	0.869	0.997	-0.44	-0.2	0	110.9	82	96.4	110.6	0.122	9.26549	3
P40926	Malate dehydrogenase, mitochondrial OS=Homo sapiens GN=MDH2 PE=1 SV=3	3	3	3	35.481	0.72	0.925	0.654	-0.47	-0.11	-0.61	121.2	87.3	112.2	79.3	0.318	6.71071	3
P55000	Secreted Ly-6/uPAR-related protein 1 OS=Homo sapiens GN=SLURP1 PE=1 SV=2	3	11	3	11.178	1.572	2.246	0.992	0.65	1.17	-0.01	68.8	108.2	154.6	68.3	9	45.3198	3
Q01151	CD83 antigen OS=Homo sapiens GN=CD83 PE=1 SV=1	3	4	3	23.027	1.668	0.925	1.048	0.74	-0.11	0.07	86.2	143.8	79.7	90.3	0.701	12.0766	3
P05060	Secretogranin-1 OS=Homo sapiens GN=CHGB PE=1 SV=2	3	10	3	78.229	0.655	0.389	0.85	-0.61	-1.36	-0.23	138.2	90.5	53.7	117.5	0.307	36.5972	3
P12955	Xaa-Pro dipeptidase OS=Homo sapiens GN=PEPD PE=1 SV=3	3	3	3	54.513	1.118	0.976	1.611	0.16	-0.03	0.69	85	95.1	83	136.9	0.304	8.0622	3
P15309	Prostatic acid phosphatase OS=Homo sapiens GN=ACPP PE=1 SV=3	3	6	3	44.537	1.122	1.397	1.23	0.17	0.48	0.3	84.2	94.5	117.7	103.6	0.585	15.7486	3
Q9H299	SH3 domain-binding glutamic acid-rich-like protein 3 OS=Homo sapiens GN=SH3BGRL3 PE=1 SV=1	3	8	3	10.431	0.3	0.396	0.692	-1.74	-1.34	-0.53	167.5	50.2	66.4	115.9	9	23.8287	3
Q8NFT8	Delta and Notch-like epidermal growth factor-related receptor OS=Homo sapiens GN=DNER PE=1 SV=1	3	4	3	78.422	0.801	0.749	0.87	-0.32	-0.42	-0.2	117	93.7	87.6	101.7	0.304	14.0168	3
P98088	Mucin-5AC (Fragments) OS=Homo sapiens GN=MUC5AC PE=1 SV=3	4	5	3	526.271	2.1	0.703	0.804	1.07	-0.51	-0.32	86.8	182.4	61	69.8	0.059	13.3228	4
Q9H0W9	Ester hydrolase C11orf54 OS=Homo sapiens GN=C11orf54 PE=1 SV=1	3	8	3	35.095	0.602	0.372	1.07	-0.73	-1.43	0.1	131.4	79.1	48.8	140.6	0.848	25.2122	3
Q9Y639	Neuroplastin OS=Homo sapiens GN=NPTN PE=1 SV=2	3	7	3	44.36	0.443	0.505	0.598	-1.17	-0.99	-0.74	157.1	69.6	79.3	94	0.468	20.2298	3
P10912	Growth hormone receptor OS=Homo sapiens GN=GHR PE=1 SV=1	3	3	3	71.454	0.504	0.447	1.175	-0.99	-1.16	0.23	128	64.5	57.2	150.3	0.318	9.89048	3
Q53RD9	Fibulin-7 OS=Homo sapiens GN=FBLN7 PE=2 SV=1	3	3	3	47.345	0.561	0.521	0.81	-0.83	-0.94	-0.3	138.3	77.6	72.1	112	0.259	8.82217	3
Q6UWP8	Suprabasin OS=Homo sapiens GN=SBSN PE=2 SV=1	3	4	3	25.32	1.488	1.882	1.055	0.57	0.91	0.08	73.7	109.7	138.8	77.8	0.638	9.03197	3
Q9HBB8	Cadherin-related family member 5 OS=Homo sapiens GN=CDHR5 PE=1 SV=3	3	8	3	88.169	0.758	0.759	0.677	-0.4	-0.4	-0.56	125.3	94.9	95	84.8	0.701	18.14	3
P01617	Ig kappa chain V-II region TEW OS=Homo sapiens PE=1 SV=1	3	17	3	12.308	1.21	1.999	0.867	0.28	1	-0.21	78.8	95.4	157.5	68.3	24.119	62.1356	3
P22223	Cadherin-3 OS=Homo sapiens GN=CDH3 PE=1 SV=2	4	5	3	91.362	0.656	0.864	1.019	-0.61	-0.21	0.03	113.1	74.1	97.7	115.1	0.292	16.1107	4
Q8N3J6	Cell adhesion molecule 2 OS=Homo sapiens GN=CADM2 PE=2 SV=1	3	7	3	47.524	0.519	0.432	0.772	-0.95	-1.21	-0.37	146.9	76.3	63.4	113.4	1.154	25.5252	3
P22748	Carbonic anhydrase 4 OS=Homo sapiens GN=CA4 PE=1 SV=2	3	4	3	35.01	0.955	0.502	0.746	-0.07	-0.99	-0.42	124.9	119.3	62.7	93.1	0.848	9.59273	3
Q9NY72	Sodium channel subunit beta-3 OS=Homo sapiens GN=SCN3B PE=1 SV=1	3	3	3	24.686	0.509	0.479	0.666	-0.97	-1.06	-0.59	150.7	76.7	72.2	100.4	0.778	9.40754	3
P14778	Interleukin-1 receptor type 1 OS=Homo sapiens GN=IL1R1 PE=1 SV=1	3	4	3	65.361	0.83	0.877	0.756	-0.27	-0.19	-0.4	115.5	95.8	101.3	87.4	0.218	10.6073	3
P32004	Neural cell adhesion molecule L1 OS=Homo sapiens GN=L1CAM PE=1 SV=2	3	5	3	139.915	0.751	0.616	0.726	-0.41	-0.7	-0.46	129.3	97.1	79.6	94	0.166	18.3564	3
Q9H9P2	Chondrolectin OS=Homo sapiens GN=CHODL PE=2 SV=2	3	4	3	30.411	0.491	0.342	0.915	-1.02	-1.55	-0.13	145.5	71.5	49.8	133.2	0.701	10.9675	3
Q13508	Ecto-ADP-ribosyltransferase 3 OS=Homo sapiens GN=ART3 PE=1 SV=2	3	7	3	43.895	3.656	1.642	1.251	1.87	0.72	0.32	53	193.7	87	66.3	0.468	21.2251	3
Q9UKR3	Kallikrein-13 OS=Homo sapiens GN=KLK13 PE=1 SV=1	3	5	3	30.551	0.401	0.424	0.631	-1.32	-1.24	-0.66	162.9	65.4	69	102.7	0.719	16.021	3
P04216	Thy-1 membrane glycoprotein OS=Homo sapiens GN=THY1 PE=1 SV=2	3	15	3	17.923	0.725	0.918	1.089	-0.46	-0.12	0.12	107.2	77.7	98.4	116.7	4.623	57.8685	3
Q08188	Protein-glutamine gamma-glutamyltransferase E OS=Homo sapiens GN=TGM3 PE=1 SV=4	3	4	3	76.584	1.703	0.804	0.739	0.77	-0.32	-0.44	94.2	160.4	75.7	69.6	0.17	9.61854	3
P31949	Protein S100-A11 OS=Homo sapiens GN=S100A11 PE=1 SV=2	3	6	3	11.733	1.426	0.713	0.661	0.51	-0.49	-0.6	105.3	150.1	75	69.6	2.728	20.9898	3
P01589	Interleukin-2 receptor subunit alpha OS=Homo sapiens GN=IL2RA PE=1 SV=1	3	7	3	30.799	1.493	1.191	0.924	0.58	0.25	-0.11	86.8	129.6	103.4	80.3	3.217	17.9611	3
P01781	Ig heavy chain V-III region GAL OS=Homo sapiens PE=1 SV=1	3	4	3	12.722	0.913	1.684	0.745	-0.13	0.75	-0.42	92.1	84.1	155.1	68.6	2.728	14.0823	3
Q2UY09	Collagen alpha-1(XXVIII) chain OS=Homo sapiens GN=COL28A1 PE=2 SV=2	3	10	3	116.585	2.559	1.182	0.962	1.36	0.24	-0.06	70.1	179.5	82.9	67.5	0.202	32.467	3
Q15485	Ficolin-2 OS=Homo sapiens GN=FCN2 PE=1 SV=2	3	5	3	33.98	0.554	0.415	0.568	-0.85	-1.27	-0.82	157.7	87.4	65.4	89.5	0.668	12.1749	3
P00746	Complement factor D OS=Homo sapiens GN=CFD PE=1 SV=5	3	5	3	27.016	0.981	1.137	1.107	-0.03	0.19	0.15	94.7	92.9	107.7	104.8	0.931	19.5015	3
O75015	Low affinity immunoglobulin gamma Fc region receptor III-B OS=Homo sapiens GN=FCGR3B PE=1 SV=2	7	35	3	26.199	0.264	0.274	0.88	-1.92	-1.87	-0.18	165.4	43.7	45.3	145.5	16.783	104.246	7
Q8WU39	Plasma cell-induced resident endoplasmic reticulum protein OS=Homo sapiens GN=PACAP PE=1 SV=1	3	6	3	20.681	0.77	0.936	0.84	-0.38	-0.09	-0.25	112.8	86.9	105.6	94.7	2.162	17.6811	3
Q9H8J5	MANSC domain-containing protein 1 OS=Homo sapiens GN=MANSC1 PE=2 SV=1	3	7	3	46.781	1.374	1.757	1.286	0.46	0.81	0.36	73.8	101.5	129.7	94.9	0.995	20.8664	3
P13688	Carcinoembryonic antigen-related cell adhesion molecule 1 OS=Homo sapiens GN=CEACAM1 PE=1 SV=2	3	5	3	57.525	1.505	1.088	1.178	0.59	0.12	0.24	83.8	126.2	91.2	98.8	0.896	19.7044	3
P05997	Collagen alpha-2(V) chain OS=Homo sapiens GN=COL5A2 PE=1 SV=3	3	3	3	144.821	1.036	0.837	0.625	0.05	-0.26	-0.68	114.3	118.5	95.7	71.4	0.08	9.17999	3
P06703	Protein S100-A6 OS=Homo sapiens GN=S100A6 PE=1 SV=1	3	4	3	10.173	1.509	0.798	0.941	0.59	-0.33	-0.09	94.2	142.1	75.1	88.6	2.981	9.54531	3
P48304	Lithostathine-1-beta OS=Homo sapiens GN=REG1B PE=1 SV=1	5	37	3	18.653	1.671	6.179	0.745	0.74	2.63	-0.42	41.7	69.7	257.6	31.1	25.827	116.524	5
O43291	Kunitz-type protease inhibitor 2 OS=Homo sapiens GN=SPINT2 PE=1 SV=2	3	14	3	28.21	1.721	0.717	1.005	0.78	-0.48	0.01	90	155	64.5	90.5	1.031	53.1055	3
O75487	Glypican-4 OS=Homo sapiens GN=GPC4 PE=1 SV=4	3	3	3	62.372	0.544	0.59	0.6	-0.88	-0.76	-0.74	146.3	79.6	86.3	87.8	0.241	9.20151	3
O75369	Filamin-B OS=Homo sapiens GN=FLNB PE=1 SV=2	3	3	3	277.99	0.982	0.887	0.737	-0.03	-0.17	-0.44	110.9	108.9	98.4	81.8	0.045	12.6825	3
Q6FHJ7	Secreted frizzled-related protein 4 OS=Homo sapiens GN=SFRP4 PE=1 SV=2	3	6	3	39.8	1.775	1.18	1.772	0.83	0.24	0.83	69.9	124	82.4	123.7	0.668	22.4152	3
P04155	Trefoil factor 1 OS=Homo sapiens GN=TFF1 PE=1 SV=1	3	13	3	9.143	1.602	1.405	2.549	0.68	0.49	1.35	61	97.7	85.7	155.5	9	50.1567	3
Q13308	Inactive tyrosine-protein kinase 7 OS=Homo sapiens GN=PTK7 PE=1 SV=2	3	3	3	118.317	0.579	0.54	0.848	-0.79	-0.89	-0.24	134.8	78.1	72.8	114.3	0.114	9.3297	3
P01860	Ig gamma-3 chain C region OS=Homo sapiens GN=IGHG3 PE=1 SV=2	10	90	3	41.26	1.55	2.25	0.723	0.63	1.17	-0.47	72.4	112.3	162.9	52.4	10.365	292.686	10
P36941	Tumor necrosis factor receptor superfamily member 3 OS=Homo sapiens GN=LTBR PE=1 SV=1	3	3	3	46.679	1.927	1.669	1.16	0.95	0.74	0.21	69.5	133.9	116	80.6	0.54	7.95867	3
P54727	UV excision repair protein RAD23 homolog B OS=Homo sapiens GN=RAD23B PE=1 SV=1	4	6	3	43.145	0.304	0.409	0.547	-1.72	-1.29	-0.87	177	53.9	72.4	96.7	0.719	17.0248	4
P01591	Immunoglobulin J chain OS=Homo sapiens GN=IGJ PE=1 SV=4	3	5	3	18.087	0.913	0.955	0.922	-0.13	-0.07	-0.12	105.6	96.4	100.8	97.3	1.512	14.5289	3
P29622	Kallistatin OS=Homo sapiens GN=SERPINA4 PE=1 SV=3	3	3	3	48.511	0.797	1.056	0.938	-0.33	0.08	-0.09	105.5	84.1	111.4	99	0.318	10.8523	3
P04114	Apolipoprotein B-100 OS=Homo sapiens GN=APOB PE=1 SV=2	3	5	3	515.283	1.03	1.606	0.895	0.04	0.68	-0.16	88.3	90.9	141.8	79	0.039	14.7278	3
Q6UX15	Layilin OS=Homo sapiens GN=LAYN PE=2 SV=1	3	4	3	43.081	0.93	0.656	1.508	-0.1	-0.61	0.59	97.7	90.9	64.1	147.3	0.668	11.7747	3
Q9UBX7	Kallikrein-11 OS=Homo sapiens GN=KLK11 PE=1 SV=2	3	5	3	31.039	1.381	1.139	1.329	0.47	0.19	0.41	82.5	113.9	93.9	109.7	0.668	14.6745	3
Q9UL52	Transmembrane protease serine 11E OS=Homo sapiens GN=TMPRSS11E PE=1 SV=2	3	5	3	47.665	1.08	1.094	0.678	0.11	0.13	-0.56	103.8	112.1	113.7	70.4	0.445	11.0087	3
Q15223	Poliovirus receptor-related protein 1 OS=Homo sapiens GN=PVRL1 PE=1 SV=3	3	4	3	57.122	0.182	0.159	0.611	-2.46	-2.65	-0.71	205	37.2	32.6	125.2	0.425	17.3428	3
Q96NZ9	Proline-rich acidic protein 1 OS=Homo sapiens GN=PRAP1 PE=1 SV=2	2	3	2	17.197	0.675	0.548	0.55	-0.57	-0.87	-0.86	144.2	97.3	79.1	79.3	1.371	7.84393	2
P63208	S-phase kinase-associated protein 1 OS=Homo sapiens GN=SKP1 PE=1 SV=2	2	2	2	18.646	0.688	0.545	1.055	-0.54	-0.88	0.08	121.6	83.7	66.2	128.4	0.468	5.15798	2
P08779	Keratin, type I cytoskeletal 16 OS=Homo sapiens GN=KRT16 PE=1 SV=4	11	25	2	51.236	1.269	2.181	0.82	0.34	1.12	-0.29	75.9	96.3	165.5	62.3	1.352	79.0393	11
P08246	Neutrophil elastase OS=Homo sapiens GN=ELANE PE=1 SV=1	2	3	2	28.5	3.422	0.582	0.579	1.77	-0.78	-0.79	71.6	245.2	41.7	41.5	0.425	8.89636	2
P02775	Platelet basic protein OS=Homo sapiens GN=PPBP PE=1 SV=3	2	4	2	13.885	0.47	0.562	0.242	-1.09	-0.83	-2.05	175.9	82.7	98.9	42.5	1.683	13.8111	2
P12259	Coagulation factor V OS=Homo sapiens GN=F5 PE=1 SV=4	2	11	2	251.546	0.784	0.657	1.26	-0.35	-0.61	0.33	108.1	84.7	71.1	136.2	0.122	32.8963	2
P37173	TGF-beta receptor type-2 OS=Homo sapiens GN=TGFBR2 PE=1 SV=2	2	10	2	64.526	0.457	0.54	1.5	-1.13	-0.89	0.59	114.4	52.3	61.7	171.6	0.212	35.9443	2
P41217	OX-2 membrane glycoprotein OS=Homo sapiens GN=CD200 PE=1 SV=4	2	5	2	31.244	0.408	0.479	0.672	-1.29	-1.06	-0.57	156.3	63.7	74.9	105.1	1.31	15.9554	2
Q6ZWJ8	Kielin/chordin-like protein OS=Homo sapiens GN=KCP PE=2 SV=2	2	2	2	159.828	1.362	1.393	1.037	0.45	0.48	0.05	83.5	113.7	116.3	86.6	0.077	7.24969	2
Q9Y490	Talin-1 OS=Homo sapiens GN=TLN1 PE=1 SV=3	2	4	2	269.599	2.396	2.993	1.011	1.26	1.58	0.02	54.1	129.5	161.8	54.6	0.045	7.96021	2
Q04771	Activin receptor type-1 OS=Homo sapiens GN=ACVR1 PE=1 SV=1	2	5	2	57.116	2.138	1.464	1.174	1.1	0.55	0.23	69.2	148.1	101.4	81.3	0.52	14.9418	2
P80303	Nucleobindin-2 OS=Homo sapiens GN=NUCB2 PE=1 SV=2	2	3	2	50.164	0.696	0.428	1.592	-0.52	-1.23	0.67	107.7	74.9	46	171.4	0.212	9.47688	2
Q12864	Cadherin-17 OS=Homo sapiens GN=CDH17 PE=1 SV=3	2	3	2	92.162	0.485	0.424	0.493	-1.04	-1.24	-1.02	166.6	80.8	70.6	82	0.174	12.5545	2
P80511	Protein S100-A12 OS=Homo sapiens GN=S100A12 PE=1 SV=2	2	4	2	10.569	4.202	0.563	0.418	2.07	-0.83	-1.26	64.7	271.9	36.4	27	2.981	12.3699	2
P36897	TGF-beta receptor type-1 OS=Homo sapiens GN=TGFBR1 PE=1 SV=1	2	4	2	55.923	0.673	0.629	1.155	-0.57	-0.67	0.21	115.7	77.9	72.8	133.7	0.259	15.8665	2
Q8WVN6	Secreted and transmembrane protein 1 OS=Homo sapiens GN=SECTM1 PE=1 SV=2	2	21	2	27.022	0.405	0.505	0.549	-1.31	-0.98	-0.86	162.7	65.8	82.2	89.3	9	91.5089	2
P09211	Glutathione S-transferase P OS=Homo sapiens GN=GSTP1 PE=1 SV=2	2	4	2	23.341	0.565	0.547	0.669	-0.82	-0.87	-0.58	143.8	81.3	78.7	96.2	0.778	8.34541	2
Q14847	LIM and SH3 domain protein 1 OS=Homo sapiens GN=LASP1 PE=1 SV=2	2	2	2	29.698	0.504	0.491	0.619	-0.99	-1.03	-0.69	153	77.2	75.1	94.7	0.292	6.74845	2
Q9Y561	Low-density lipoprotein receptor-related protein 12 OS=Homo sapiens GN=LRP12 PE=1 SV=1	2	3	2	94.923	1.215	1.161	0.979	0.28	0.21	-0.03	91.9	111.6	106.6	90	0.046	7.53154	2
P30101	Protein disulfide-isomerase A3 OS=Homo sapiens GN=PDIA3 PE=1 SV=4	2	2	2	56.747	0.318	0.373	0.73	-1.65	-1.42	-0.45	165.2	52.5	61.7	120.6	0.15	6.9692	2
Q8IYS5	Osteoclast-associated immunoglobulin-like receptor OS=Homo sapiens GN=OSCAR PE=2 SV=3	2	10	2	30.462	0.763	0.563	0.684	-0.39	-0.83	-0.55	132.9	101.4	74.8	91	1.512	18.7902	2
P61956	Small ubiquitin-related modifier 2 OS=Homo sapiens GN=SUMO2 PE=1 SV=3	2	5	2	10.864	0.411	0.55	0.617	-1.28	-0.86	-0.7	155.2	63.7	85.3	95.8	3.642	17.1676	2
P32942	Intercellular adhesion molecule 3 OS=Homo sapiens GN=ICAM3 PE=1 SV=2	2	2	2	59.503	0.579	0.504	0.429	-0.79	-0.99	-1.22	159.2	92.2	80.3	68.3	0.179	4.47552	2
P41271	Neuroblastoma suppressor of tumorigenicity 1 OS=Homo sapiens GN=NBL1 PE=1 SV=1	2	5	2	19.264	0.279	0.562	1.901	-1.84	-0.83	0.93	106.9	29.8	60.1	203.2	2.981	17.9688	2
P06331	Ig heavy chain V-II region ARH-77 OS=Homo sapiens PE=4 SV=1	2	4	2	16.218	0.871	1.432	0.707	-0.2	0.52	-0.5	99.8	86.9	142.8	70.5	1.512	13.946	2
P01742	Ig heavy chain V-I region EU OS=Homo sapiens PE=1 SV=1	2	6	2	12.464	5.712	9.462	0.855	2.51	3.24	-0.23	23.5	134.2	222.2	20.1	1.683	11.435	2
Q01955	Collagen alpha-3(IV) chain OS=Homo sapiens GN=COL4A3 PE=1 SV=3	2	4	2	161.711	0.926	0.974	0.733	-0.11	-0.04	-0.45	110.1	101.9	107.3	80.7	0.051	9.51865	2
Q86Y38	Xylosyltransferase 1 OS=Homo sapiens GN=XYLT1 PE=1 SV=1	2	4	2	107.501	0.866	0.801	0.9	-0.21	-0.32	-0.15	112.1	97.1	89.8	100.9	0.175	18.9979	2
P16109	P-selectin OS=Homo sapiens GN=SELP PE=1 SV=3	2	5	2	90.773	1.777	1.125	1.055	0.83	0.17	0.08	80.7	143.4	90.8	85.1	0.212	9.82438	2
Q9NR99	Matrix-remodeling-associated protein 5 OS=Homo sapiens GN=MXRA5 PE=2 SV=3	2	2	2	311.955	0.324	0.324	0.451	-1.63	-1.63	-1.15	190.5	61.7	61.8	86	0.029	6.20573	2
P07306	Asialoglycoprotein receptor 1 OS=Homo sapiens GN=ASGR1 PE=1 SV=2	2	2	2	33.165	1.007	1.115	1.189	0.01	0.16	0.25	92.8	93.5	103.4	110.3	0.259	6.77212	2
P62805	Histone H4 OS=Homo sapiens GN=HIST1H4A PE=1 SV=2	2	2	2	11.36	0.926	0.808	0.651	-0.11	-0.31	-0.62	118.2	109.4	95.5	76.9	1.154	5.84087	2
P35579	Myosin-9 OS=Homo sapiens GN=MYH9 PE=1 SV=4	2	4	2	226.392	2.13	1.085	1.08	1.09	0.12	0.11	75.5	160.9	82	81.6	0.055	13.7778	2
Q16787	Laminin subunit alpha-3 OS=Homo sapiens GN=LAMA3 PE=1 SV=2	2	2	2	366.414	1.545	1.07	0.919	0.63	0.1	-0.12	88.2	136.3	94.4	81.1	0.023	4.7133	2
O15197	Ephrin type-B receptor 6 OS=Homo sapiens GN=EPHB6 PE=1 SV=4	2	3	2	110.63	1.09	1.359	0.991	0.12	0.44	-0.01	90.1	98.2	122.4	89.3	0.101	7.57479	2
O75095	Multiple epidermal growth factor-like domains protein 6 OS=Homo sapiens GN=MEGF6 PE=1 SV=4	2	2	2	161.072	2.183	1.882	1.412	1.13	0.91	0.5	61.8	134.8	116.2	87.2	0.07	5.94434	2
Q8TB96	T-cell immunomodulatory protein OS=Homo sapiens GN=ITFG1 PE=1 SV=1	2	2	2	68.064	0.377	0.543	0.668	-1.41	-0.88	-0.58	154.5	58.3	84	103.2	0.233	4.98598	2
P06316	Ig lambda chain V-I region BL2 OS=Homo sapiens PE=2 SV=1	2	3	2	13.556	1.102	2.041	0.767	0.14	1.03	-0.38	81.5	89.8	166.3	62.5	1.512	5.60425	2
Q92765	Secreted frizzled-related protein 3 OS=Homo sapiens GN=FRZB PE=1 SV=2	2	3	2	36.23	1.246	1.79	1.032	0.32	0.84	0.05	78.9	98.4	141.3	81.5	0.359	11.2483	2
Q9NQ84	G-protein coupled receptor family C group 5 member C OS=Homo sapiens GN=GPRC5C PE=1 SV=2	2	3	2	48.162	0.438	0.588	0.74	-1.19	-0.77	-0.44	144.7	63.3	85.1	107	0.501	9.83592	2
O43707	Alpha-actinin-4 OS=Homo sapiens GN=ACTN4 PE=1 SV=2	2	2	2	104.788	0.946	0.522	0.411	-0.08	-0.94	-1.28	138.9	131.4	72.5	57.1	0.076	6.7043	2
Q07507	Dermatopontin OS=Homo sapiens GN=DPT PE=2 SV=2	2	11	2	23.989	1.345	1.639	0.996	0.43	0.71	-0.01	80.3	108	131.7	80	4.623	16.4102	2
P0CG05	Ig lambda-2 chain C regions OS=Homo sapiens GN=IGLC2 PE=1 SV=1	5	86	2	11.287	1.156	1.939	0.813	0.21	0.96	-0.3	81.5	94.2	158	66.3	192.07	337.164	5
P20333	Tumor necrosis factor receptor superfamily member 1B OS=Homo sapiens GN=TNFRSF1B PE=1 SV=3	2	14	2	48.26	1.602	1.286	1.386	0.68	0.36	0.47	75.8	121.5	97.6	105.1	1.929	48.8366	2
Q6UY11	Protein delta homolog 2 OS=Homo sapiens GN=DLK2 PE=2 SV=1	2	6	2	40.52	2.076	1.176	0.813	1.05	0.23	-0.3	79	164	92.9	64.2	0.719	18.9221	2
Q93091	Ribonuclease K6 OS=Homo sapiens GN=RNASE6 PE=1 SV=2	2	5	2	17.185	2.15	2.264	0.907	1.1	1.18	-0.14	63.3	136	143.3	57.4	1.154	13.8087	2
P99999	Cytochrome c OS=Homo sapiens GN=CYCS PE=1 SV=2	2	4	2	11.741	0.878	0.555	0.756	-0.19	-0.85	-0.4	125.5	110.2	69.6	94.8	1.371	13.9965	2
A6NL88	Protein shisa-7 OS=Homo sapiens GN=SHISA7 PE=2 SV=3	2	2	2	56.179	1.51	0.896	0.881	0.59	-0.16	-0.18	93.3	140.9	83.6	82.2	0.15	5.11347	2
Q8IZP9	G-protein coupled receptor 64 OS=Homo sapiens GN=GPR64 PE=1 SV=2	2	7	2	111.521	2.185	1.32	1.266	1.13	0.4	0.34	69.3	151.5	91.5	87.8	0.252	20.1506	2
Q16651	Prostasin OS=Homo sapiens GN=PRSS8 PE=1 SV=1	2	15	2	36.408	0.989	0.8	0.784	-0.02	-0.32	-0.35	111.9	110.7	89.5	87.8	11.915	44.6855	2
Q96GP6	Scavenger receptor class F member 2 OS=Homo sapiens GN=SCARF2 PE=1 SV=4	2	2	2	92.418	1.935	1.473	1.052	0.95	0.56	0.07	73.2	141.7	107.9	77.1	0.108	5.94837	2
Q96C19	EF-hand domain-containing protein D2 OS=Homo sapiens GN=EFHD2 PE=1 SV=1	2	2	2	26.68	2.003	0.673	0.588	1	-0.57	-0.77	93.8	187.9	63.1	55.2	0.311	6.99388	2
O75094	Slit homolog 3 protein OS=Homo sapiens GN=SLIT3 PE=2 SV=3	2	3	2	167.604	1.531	1.157	0.929	0.61	0.21	-0.11	86.6	132.6	100.3	80.5	0.057	6.58718	2
P04118	Colipase OS=Homo sapiens GN=CLPS PE=1 SV=2	2	2	2	11.946	0.996	1.14	0.813	-0.01	0.19	-0.3	101.3	100.9	115.5	82.3	0.931	4.81503	2
P31431	Syndecan-4 OS=Homo sapiens GN=SDC4 PE=1 SV=2	2	7	2	21.628	0.267	0.283	0.725	-1.9	-1.82	-0.46	175.8	47	49.8	127.4	1.783	26.4607	2
P12104	Fatty acid-binding protein, intestinal OS=Homo sapiens GN=FABP2 PE=1 SV=2	2	3	2	15.198	1.126	1.899	1.13	0.17	0.93	0.18	77.6	87.4	147.4	87.7	0.995	11.0345	2
P27824	Calnexin OS=Homo sapiens GN=CANX PE=1 SV=2	2	4	2	67.526	0.759	0.958	1.281	-0.4	-0.06	0.36	100	75.9	95.9	128.2	0.269	9.80226	2
Q6UY14	ADAMTS-like protein 4 OS=Homo sapiens GN=ADAMTSL4 PE=1 SV=2	2	3	2	116.471	0.419	0.412	0.595	-1.25	-1.28	-0.75	164.9	69.1	67.9	98.1	0.08	7.97431	2
P55008	Allograft inflammatory factor 1 OS=Homo sapiens GN=AIF1 PE=1 SV=1	2	2	2	16.693	2.406	0.88	0.554	1.27	-0.18	-0.85	82.6	198.8	72.7	45.8	0.468	5.60015	2
Q12866	Tyrosine-protein kinase Mer OS=Homo sapiens GN=MERTK PE=1 SV=2	2	2	2	110.179	0.759	0.693	0.931	-0.4	-0.53	-0.1	118.2	89.7	82	110.1	0.094	4.93636	2
Q08334	Interleukin-10 receptor subunit beta OS=Homo sapiens GN=IL10RB PE=1 SV=2	2	4	2	36.971	0.426	0.482	0.73	-1.23	-1.05	-0.45	151.7	64.6	73	110.7	0.468	14.1147	2
Q9Y3B3	Transmembrane emp24 domain-containing protein 7 OS=Homo sapiens GN=TMED7 PE=1 SV=2	2	4	2	25.156	2.441	1.947	1.253	1.29	0.96	0.33	60.2	147	117.3	75.5	0.638	14.5994	2
P33151	Cadherin-5 OS=Homo sapiens GN=CDH5 PE=1 SV=5	2	2	2	87.474	0.883	0.929	1.007	-0.18	-0.11	0.01	104.7	92.5	97.3	105.5	0.141	6.25081	2
Q9UKY0	Prion-like protein doppel OS=Homo sapiens GN=PRND PE=1 SV=2	2	4	2	20.28	0.294	0.245	0.9	-1.77	-2.03	-0.15	164	48.2	40.3	147.5	1.154	13.2912	2
P01130	Low-density lipoprotein receptor OS=Homo sapiens GN=LDLR PE=1 SV=1	2	3	2	95.314	0.942	0.686	1.182	-0.09	-0.54	0.24	105	98.9	72	124.1	0.101	9.40966	2
Q08722	Leukocyte surface antigen CD47 OS=Homo sapiens GN=CD47 PE=1 SV=1	2	5	2	35.191	1.043	0.671	0.879	0.06	-0.58	-0.19	111.4	116.1	74.7	97.9	0.359	15.768	2
P11171	Protein 4.1 OS=Homo sapiens GN=EPB41 PE=1 SV=4	2	3	2	96.957	0.649	0.628	0.365	-0.62	-0.67	-1.46	151.4	98.3	95.1	55.2	0.131	9.40109	2
Q8N1N4	Keratin, type II cytoskeletal 78 OS=Homo sapiens GN=KRT78 PE=2 SV=2	3	4	2	56.83	0.963	1.201	0.639	-0.05	0.26	-0.65	105.2	101.2	126.3	67.3	0.205	7.81906	3
P01598	Ig kappa chain V-I region EU OS=Homo sapiens PE=1 SV=1	2	10	2	11.781	1.237	1.435	0.753	0.31	0.52	-0.41	90.4	111.8	129.7	68	13.678	34.4869	2
Q8IWU5	Extracellular sulfatase Sulf-2 OS=Homo sapiens GN=SULF2 PE=1 SV=1	2	8	2	100.39	0.732	0.439	0.564	-0.45	-1.19	-0.83	146.2	107	64.2	82.5	0.252	33.2239	2
P08118	Beta-microseminoprotein OS=Homo sapiens GN=MSMB PE=1 SV=1	2	9	2	12.856	7.372	1.316	1.65	2.88	0.4	0.72	35.3	260.1	46.4	58.2	2.162	23.7519	2
P01225	Follitropin subunit beta OS=Homo sapiens GN=FSHB PE=1 SV=2	2	3	2	14.69	1.651	0.934	1.06	0.72	-0.1	0.08	86.1	142.2	80.4	91.3	0.778	8.70931	2
Q86YT9	Junctional adhesion molecule-like OS=Homo sapiens GN=AMICA1 PE=1 SV=1	2	3	2	44.311	0.788	1.187	0.864	-0.34	0.25	-0.21	104.2	82.1	123.7	90	0.334	9.41991	2
P13640	Metallothionein-1G OS=Homo sapiens GN=MT1G PE=1 SV=2	2	5	2	6.136	1.389	0.283	1.392	0.47	-1.82	0.48	98.4	136.7	27.9	137	9	15.834	2
P59665	Neutrophil defensin 1 OS=Homo sapiens GN=DEFA1 PE=1 SV=1	2	7	2	10.194	1.498	1.016	0.68	0.58	0.02	-0.56	95.4	142.9	96.9	64.8	1.154	18.9548	2
P02652	Apolipoprotein A-II OS=Homo sapiens GN=APOA2 PE=1 SV=1	2	2	2	11.168	0.844	0.663	1.273	-0.24	-0.59	0.35	105.8	89.3	70.1	134.7	1.512	6.29072	2
P63241	Eukaryotic translation initiation factor 5A-1 OS=Homo sapiens GN=EIF5A PE=1 SV=2	2	2	2	16.821	0.261	0.26	0.303	-1.94	-1.94	-1.72	219.4	57.2	57	66.4	0.778	7.06399	2
Q9UGM5	Fetuin-B OS=Homo sapiens GN=FETUB PE=1 SV=2	2	2	2	42.028	1.145	1.074	1.304	0.2	0.1	0.38	88.4	101.3	95	115.3	0.233	5.95819	2
P29034	Protein S100-A2 OS=Homo sapiens GN=S100A2 PE=1 SV=3	2	2	2	11.109	0.485	0.407	0.694	-1.04	-1.3	-0.53	154.7	75	63	107.3	1.512	5.23838	2
P35612	Beta-adducin OS=Homo sapiens GN=ADD2 PE=1 SV=3	2	2	2	80.803	0.467	0.503	0.368	-1.1	-0.99	-1.44	171.1	79.9	86	63	0.11	6.76588	2
O60888	Protein CutA OS=Homo sapiens GN=CUTA PE=1 SV=2	2	5	2	19.104	0.753	0.692	0.836	-0.41	-0.53	-0.26	121.9	91.9	84.3	101.9	2.162	15.2138	2
P36896	Activin receptor type-1B OS=Homo sapiens GN=ACVR1B PE=1 SV=1	2	10	2	56.77	1.494	0.933	1.174	0.58	-0.1	0.23	86.9	129.9	81.1	102.1	0.557	31.0687	2
P35321	Cornifin-A OS=Homo sapiens GN=SPRR1A PE=1 SV=2	4	12	2	9.871	0.764	0.873	1.888	-0.39	-0.2	0.92	88.4	67.6	77.2	166.9	4.623	30.7612	4
Q08554	Desmocollin-1 OS=Homo sapiens GN=DSC1 PE=1 SV=2	2	2	2	99.924	1.707	2.705	1.316	0.77	1.44	0.4	59.5	101.5	160.8	78.2	0.094	5.06809	2
O43852	Calumenin OS=Homo sapiens GN=CALU PE=1 SV=2	2	2	2	37.084	0.28	0.336	0.572	-1.84	-1.58	-0.81	182.8	51.2	61.4	104.6	0.311	5.47991	2
Q9BRK5	45 kDa calcium-binding protein OS=Homo sapiens GN=SDF4 PE=1 SV=1	2	2	2	41.78	0.722	0.631	0.837	-0.47	-0.66	-0.26	125.4	90.5	79.1	105	0.245	7.13384	2
O60437	Periplakin OS=Homo sapiens GN=PPL PE=1 SV=4	2	2	2	204.623	1.08	0.956	1.134	0.11	-0.07	0.18	95.9	103.6	91.7	108.7	0.035	5.2165	2
P07384	Calpain-1 catalytic subunit OS=Homo sapiens GN=CAPN1 PE=1 SV=1	2	2	2	81.838	1.333	0.853	0.731	0.42	-0.23	-0.45	102.1	136.1	87.1	74.6	0.116	5.98309	2
Q14126	Desmoglein-2 OS=Homo sapiens GN=DSG2 PE=1 SV=2	2	5	2	122.218	0.777	0.695	0.73	-0.36	-0.53	-0.45	124.9	97	86.8	91.2	0.126	14.9253	2
P40199	Carcinoembryonic antigen-related cell adhesion molecule 6 OS=Homo sapiens GN=CEACAM6 PE=1 SV=3	2	3	2	37.172	0.909	1.1	0.72	-0.14	0.14	-0.47	107.3	97.6	118	77.2	0.389	11.8074	2
Q496F6	CMRF35-like molecule 2 OS=Homo sapiens GN=CD300E PE=1 SV=2	2	4	2	22.904	1.149	0.612	1.067	0.2	-0.71	0.09	104.5	120.1	63.9	111.5	1.31	18.247	2
Q6UXD5	Seizure 6-like protein 2 OS=Homo sapiens GN=SEZ6L2 PE=1 SV=2	2	5	2	97.498	1.071	0.741	1.033	0.1	-0.43	0.05	104	111.4	77.1	107.4	0.417	17.6888	2
P62258	14-3-3 protein epsilon OS=Homo sapiens GN=YWHAE PE=1 SV=1	2	3	2	29.155	0.502	0.406	0.818	-0.99	-1.3	-0.29	146.7	73.7	59.6	120	0.468	4.44606	2
Q6UVK1	Chondroitin sulfate proteoglycan 4 OS=Homo sapiens GN=CSPG4 PE=1 SV=2	2	2	2	250.382	0.935	0.996	1.076	-0.1	-0.01	0.11	99.8	93.4	99.4	107.4	0.047	6.10094	2
Q6E0U4	Dermokine OS=Homo sapiens GN=DMKN PE=1 SV=3	2	9	2	47.054	1.084	1.195	1.016	0.12	0.26	0.02	93.1	101	111.3	94.6	1.069	34.2333	2
P04156	Major prion protein OS=Homo sapiens GN=PRNP PE=1 SV=1	2	22	2	27.643	1.04	0.905	0.664	0.06	-0.14	-0.59	110.9	115.3	100.3	73.6	4.012	59.5329	2
Q14112	Nidogen-2 OS=Homo sapiens GN=NID2 PE=1 SV=3	2	2	2	151.158	1.48	1.319	1.118	0.57	0.4	0.16	81.3	120.4	107.3	91	0.076	8.11596	2
Q86UD1	Out at first protein homolog OS=Homo sapiens GN=OAF PE=2 SV=1	2	2	2	30.669	0.726	0.633	0.593	-0.46	-0.66	-0.75	135.5	98.4	85.8	80.3	0.389	6.01446	2
P04003	C4b-binding protein alpha chain OS=Homo sapiens GN=C4BPA PE=1 SV=2	2	8	2	66.989	1.142	1.203	0.996	0.19	0.27	-0.01	92.1	105.3	110.9	91.7	0.274	22.1211	2
P31153	S-adenosylmethionine synthase isoform type-2 OS=Homo sapiens GN=MAT2A PE=1 SV=1	2	2	2	43.633	1.109	0.739	0.558	0.15	-0.44	-0.84	117.4	130.3	86.8	65.5	0.105	4.66544	2
Q15043	Zinc transporter ZIP14 OS=Homo sapiens GN=SLC39A14 PE=1 SV=3	2	4	2	54.177	0.34	0.413	0.755	-1.56	-1.28	-0.41	159.5	54.2	65.8	120.4	0.359	8.76354	2
Q5ZPR3	CD276 antigen OS=Homo sapiens GN=CD276 PE=1 SV=1	2	6	2	57.199	1.108	0.712	0.875	0.15	-0.49	-0.19	108.2	120	77	94.7	0.624	21.7834	2
Q99969	Retinoic acid receptor responder protein 2 OS=Homo sapiens GN=RARRES2 PE=1 SV=1	2	5	2	18.606	0.633	0.423	0.741	-0.66	-1.24	-0.43	143	90.5	60.5	106	1.512	18.4215	2
O75084	Frizzled-7 OS=Homo sapiens GN=FZD7 PE=2 SV=2	3	4	2	63.578	1.405	0.895	1.286	0.49	-0.16	0.36	87.2	122.6	78.1	112.1	0.468	12.973	3
P50502	Hsc70-interacting protein OS=Homo sapiens GN=ST13 PE=1 SV=2	2	2	2	41.305	0.447	0.757	0.645	-1.16	-0.4	-0.63	140.4	62.8	106.2	90.6	0.292	6.35995	2
P15085	Carboxypeptidase A1 OS=Homo sapiens GN=CPA1 PE=1 SV=2	2	2	2	47.111	1.728	2.035	1.23	0.79	1.03	0.3	66.7	115.4	135.8	82.1	0.194	7.07218	2
P31995	Low affinity immunoglobulin gamma Fc region receptor II-c OS=Homo sapiens GN=FCGR2C PE=1 SV=1	2	3	2	35.556	0.657	0.608	1.335	-0.61	-0.72	0.42	111.1	73	67.6	148.3	0.778	7.56087	2
P25940	Collagen alpha-3(V) chain OS=Homo sapiens GN=COL5A3 PE=1 SV=3	2	4	2	172.016	0.229	0.266	0.407	-2.13	-1.91	-1.3	210.3	48.2	55.9	85.6	0.072	16.747	2
P55268	Laminin subunit beta-2 OS=Homo sapiens GN=LAMB2 PE=1 SV=2	2	2	2	195.854	1.482	1.032	0.825	0.57	0.05	-0.28	92.2	136.6	95.1	76.1	0.043	6.69569	2
O95388	WNT1-inducible-signaling pathway protein 1 OS=Homo sapiens GN=WISP1 PE=1 SV=1	2	3	2	40.304	1.38	1.118	0.941	0.47	0.16	-0.09	90.1	124.4	100.8	84.8	0.274	5.34125	2
O00560	Syntenin-1 OS=Homo sapiens GN=SDCBP PE=1 SV=1	2	2	2	32.424	1.111	1.113	0.885	0.15	0.15	-0.18	97.4	108.1	108.3	86.2	0.292	4.90554	2
P14784	Interleukin-2 receptor subunit beta OS=Homo sapiens GN=IL2RB PE=1 SV=1	2	2	2	61.079	0.65	0.832	0.485	-0.62	-0.27	-1.04	134.8	87.6	112.1	65.4	0.202	4.56226	2
Q8TCZ2	CD99 antigen-like protein 2 OS=Homo sapiens GN=CD99L2 PE=2 SV=1	2	9	2	27.969	0.454	0.462	0.905	-1.14	-1.11	-0.14	141.8	64.3	65.5	128.3	0.848	31.1577	2
Q9H6Y7	E3 ubiquitin-protein ligase RNF167 OS=Homo sapiens GN=RNF167 PE=1 SV=1	2	5	2	38.274	1.269	1.27	1.283	0.34	0.34	0.36	83	105.3	105.3	106.4	0.585	16.5322	2
Q9UP38	Frizzled-1 OS=Homo sapiens GN=FZD1 PE=1 SV=2	3	9	2	71.112	1.353	1.589	1.577	0.44	0.67	0.66	72.5	98.1	115.2	114.3	0.45	25.832	3
P20916	Myelin-associated glycoprotein OS=Homo sapiens GN=MAG PE=1 SV=1	2	3	2	69.025	0.678	0.536	0.774	-0.56	-0.9	-0.37	133.8	90.7	71.8	103.6	0.166	11.2126	2
P34096	Ribonuclease 4 OS=Homo sapiens GN=RNASE4 PE=1 SV=3	2	2	2	16.829	1.151	0.778	0.781	0.2	-0.36	-0.36	107.8	124.1	83.9	84.2	0.585	5.48459	2
Q9UBX1	Cathepsin F OS=Homo sapiens GN=CTSF PE=1 SV=1	2	2	2	53.332	0.582	0.469	1.147	-0.78	-1.09	0.2	125.1	72.7	58.6	143.5	0.172	5.83231	2
P08195	4F2 cell-surface antigen heavy chain OS=Homo sapiens GN=SLC3A2 PE=1 SV=3	2	3	2	67.952	0.725	0.711	0.723	-0.46	-0.49	-0.47	126.6	91.8	90	91.6	0.15	7.70814	2
P52566	Rho GDP-dissociation inhibitor 2 OS=Homo sapiens GN=ARHGDIB PE=1 SV=3	2	2	2	22.974	0.577	0.463	0.383	-0.79	-1.11	-1.38	165.1	95.2	76.4	63.3	0.359	4.64065	2
O75976	Carboxypeptidase D OS=Homo sapiens GN=CPD PE=1 SV=2	2	2	2	152.835	0.62	0.612	0.737	-0.69	-0.71	-0.44	134.7	83.5	82.5	99.3	0.059	5.91926	2
O95460	Matrilin-4 OS=Homo sapiens GN=MATN4 PE=1 SV=3	2	8	2	68.443	1.645	0.724	0.809	0.72	-0.47	-0.31	95.7	157.5	69.3	77.5	0.266	29.83	2
Q9NQS3	Poliovirus receptor-related protein 3 OS=Homo sapiens GN=PVRL3 PE=1 SV=1	2	2	2	60.964	0.862	0.973	0.953	-0.22	-0.04	-0.07	105.6	91	102.7	100.7	0.212	7.28611	2
Q9NY25	C-type lectin domain family 5 member A OS=Homo sapiens GN=CLEC5A PE=1 SV=1	2	3	2	21.508	1.403	0.988	0.875	0.49	-0.02	-0.19	93.8	131.6	92.6	82	0.468	12.019	2
P28827	Receptor-type tyrosine-protein phosphatase mu OS=Homo sapiens GN=PTPRM PE=1 SV=2	2	2	2	163.578	0.623	0.496	0.668	-0.68	-1.01	-0.58	143.5	89.4	71.2	95.9	0.062	10.6441	2
Q8WWV6	High affinity immunoglobulin alpha and immunoglobulin mu Fc receptor OS=Homo sapiens GN=FCAMR PE=1 SV=1	2	4	2	57.108	0.828	0.714	1.166	-0.27	-0.49	0.22	107.9	89.3	77.1	125.8	0.318	12.276	2
P43487	Ran-specific GTPase-activating protein OS=Homo sapiens GN=RANBP1 PE=1 SV=1	2	3	2	23.296	0.391	0.446	0.362	-1.35	-1.17	-1.46	181.9	71.1	81	65.9	0.585	8.89049	2
P08575	Receptor-type tyrosine-protein phosphatase C OS=Homo sapiens GN=PTPRC PE=1 SV=2	2	2	2	147.162	1.334	1.29	0.981	0.42	0.37	-0.03	86.9	115.9	112.1	85.2	0.065	5.53005	2
P21926	CD9 antigen OS=Homo sapiens GN=CD9 PE=1 SV=4	2	4	2	25.399	0.707	1.179	0.837	-0.5	0.24	-0.26	107.5	76	126.7	89.9	1.371	13.9479	2
P61604	10 kDa heat shock protein, mitochondrial OS=Homo sapiens GN=HSPE1 PE=1 SV=2	2	2	2	10.925	0.18	0.227	0.422	-2.48	-2.14	-1.24	218.7	39.3	49.7	92.3	0.585	8.09463	2
P40121	Macrophage-capping protein OS=Homo sapiens GN=CAPG PE=1 SV=2	2	2	2	38.474	0.67	0.667	0.571	-0.58	-0.58	-0.81	137.5	92.2	91.8	78.5	0.334	4.34059	2
P15924	Desmoplakin OS=Homo sapiens GN=DSP PE=1 SV=3	2	2	2	331.569	0.622	0.813	1.316	-0.68	-0.3	0.4	106.6	66.4	86.7	140.3	0.022	8.0929	2
Q96KN2	Beta-Ala-His dipeptidase OS=Homo sapiens GN=CNDP1 PE=1 SV=4	2	3	2	56.67	0.586	0.771	0.948	-0.77	-0.37	-0.08	121	70.9	93.3	114.8	0.269	9.58426	2
P01717	Ig lambda chain V-IV region Hil OS=Homo sapiens PE=1 SV=1	2	4	2	11.51	1.147	1.42	0.703	0.2	0.51	-0.51	93.7	107.4	133	65.9	2.981	13.064	2
P06681	Complement C2 OS=Homo sapiens GN=C2 PE=1 SV=2	2	7	2	83.214	1.645	3.304	0.87	0.72	1.72	-0.2	58.7	96.5	193.8	51	0.216	24.0317	2
O60353	Frizzled-6 OS=Homo sapiens GN=FZD6 PE=1 SV=2	2	4	2	79.24	1.288	1.978	1.567	0.36	0.98	0.65	68.6	88.3	135.7	107.5	0.129	14.4486	2
Q8TDY8	Immunoglobulin superfamily DCC subclass member 4 OS=Homo sapiens GN=IGDCC4 PE=2 SV=1	2	2	2	134.126	1.069	1.233	0.814	0.1	0.3	-0.3	97.2	103.9	119.8	79.1	0.086	5.83929	2
O00115	Deoxyribonuclease-2-alpha OS=Homo sapiens GN=DNASE2 PE=1 SV=2	2	4	2	39.556	0.68	0.538	1.067	-0.56	-0.89	0.09	121.8	82.8	65.5	129.9	0.311	11.385	2
Q9UGM3	Deleted in malignant brain tumors 1 protein OS=Homo sapiens GN=DMBT1 PE=1 SV=2	2	3	2	260.569	2.685	1.078	1.053	1.43	0.11	0.07	68.8	184.7	74.1	72.4	0.05	12.5482	2
P16401	Histone H1.5 OS=Homo sapiens GN=HIST1H1B PE=1 SV=3	2	2	2	22.566	0.427	0.613	0.344	-1.23	-0.71	-1.54	167.8	71.6	102.9	57.7	0.425	4.95123	2
Q13201	Multimerin-1 OS=Homo sapiens GN=MMRN1 PE=1 SV=3	2	8	2	138.023	1.328	0.971	0.819	0.41	-0.04	-0.29	97.1	129	94.3	79.6	0.114	23.38	2
Q8IX05	CD302 antigen OS=Homo sapiens GN=CD302 PE=1 SV=1	2	2	2	26.166	0.49	0.932	1.39	-1.03	-0.1	0.48	104.9	51.4	97.8	145.9	0.585	7.47873	2
Q8NCC3	Group XV phospholipase A2 OS=Homo sapiens GN=PLA2G15 PE=1 SV=2	2	2	2	46.628	0.355	0.436	0.723	-1.49	-1.2	-0.47	159.1	56.5	69.4	115.1	0.222	5.6172	2
P25942	Tumor necrosis factor receptor superfamily member 5 OS=Homo sapiens GN=CD40 PE=1 SV=1	2	3	2	30.599	1.72	1.198	1.246	0.78	0.26	0.32	77.5	133.2	92.8	96.5	0.389	9.90117	2
P07333	Macrophage colony-stimulating factor 1 receptor OS=Homo sapiens GN=CSF1R PE=1 SV=2	2	4	2	107.915	0.795	1.045	1.207	-0.33	0.06	0.27	98.8	78.6	103.3	119.3	0.17	11.7826	2
P54819	Adenylate kinase 2, mitochondrial OS=Homo sapiens GN=AK2 PE=1 SV=2	2	2	2	26.461	0.668	0.537	0.831	-0.58	-0.9	-0.27	131.8	88.1	70.8	109.4	0.311	5.57955	2
P13796	Plastin-2 OS=Homo sapiens GN=LCP1 PE=1 SV=6	4	5	2	70.244	1.329	0.629	0.632	0.41	-0.67	-0.66	111.4	148	70.1	70.4	0.315	13.5013	4
P10645	Chromogranin-A OS=Homo sapiens GN=CHGA PE=1 SV=7	2	5	2	50.658	0.51	0.412	0.9	-0.97	-1.28	-0.15	141.7	72.3	58.3	127.6	0.389	17.0122	2
P09228	Cystatin-SA OS=Homo sapiens GN=CST2 PE=1 SV=1	3	10	2	16.434	1.129	1.379	1.419	0.17	0.46	0.5	81.2	91.7	111.9	115.2	9	24.4375	3
Q04760	Lactoylglutathione lyase OS=Homo sapiens GN=GLO1 PE=1 SV=4	2	2	2	20.764	0.374	0.307	0.697	-1.42	-1.71	-0.52	168.3	62.9	51.6	117.2	0.468	6.22552	2
P02743	Serum amyloid P-component OS=Homo sapiens GN=APCS PE=1 SV=2	2	4	2	25.371	0.359	0.36	0.46	-1.48	-1.47	-1.12	183.6	65.9	66.1	84.4	0.52	13.5907	2
O43405	Cochlin OS=Homo sapiens GN=COCH PE=1 SV=1	2	5	2	59.445	0.413	0.408	0.851	-1.28	-1.3	-0.23	149.7	61.8	61	127.5	0.241	17.5843	2
Q14956	Transmembrane glycoprotein NMB OS=Homo sapiens GN=GPNMB PE=1 SV=2	2	3	2	63.882	0.546	0.716	0.834	-0.87	-0.48	-0.26	129.2	70.5	92.5	107.7	0.222	8.33048	2
P15529	Membrane cofactor protein OS=Homo sapiens GN=CD46 PE=1 SV=3	2	6	2	43.719	1.199	1.655	1.201	0.26	0.73	0.26	79.1	94.9	131	95	0.334	18.0953	2
P15169	Carboxypeptidase N catalytic chain OS=Homo sapiens GN=CPN1 PE=1 SV=1	2	2	2	52.253	0.678	1.015	0.91	-0.56	0.02	-0.14	111	75.3	112.6	101.1	0.202	6.45748	2
Q6UXK5	Leucine-rich repeat neuronal protein 1 OS=Homo sapiens GN=LRRN1 PE=1 SV=1	2	2	2	80.665	1.268	1.086	0.981	0.34	0.12	-0.03	92.3	117	100.2	90.5	0.141	6.8782	2
P09936	Ubiquitin carboxyl-terminal hydrolase isozyme L1 OS=Homo sapiens GN=UCHL1 PE=1 SV=2	2	2	2	24.808	0.363	0.472	0.683	-1.46	-1.08	-0.55	158.9	57.6	75	108.5	0.389	8.04455	2
P29400	Collagen alpha-5(IV) chain OS=Homo sapiens GN=COL4A5 PE=1 SV=2	2	4	2	160.943	0.177	0.185	0.621	-2.5	-2.43	-0.69	201.7	35.7	37.4	125.2	0.062	16.0235	2
Q96B86	Repulsive guidance molecule A OS=Homo sapiens GN=RGMA PE=1 SV=3	2	2	2	49.316	2.551	2.068	1.082	1.35	1.05	0.11	59.7	152.3	123.5	64.6	0.202	6.61125	2
P61769	Beta-2-microglobulin OS=Homo sapiens GN=B2M PE=1 SV=1	2	22	2	13.706	0.274	0.794	0.822	-1.87	-0.33	-0.28	138.4	37.9	109.9	113.8	9	71.8896	2
P48551	Interferon alpha/beta receptor 2 OS=Homo sapiens GN=IFNAR2 PE=1 SV=1	2	4	2	57.722	0.354	0.669	1.052	-1.5	-0.58	0.07	130.1	46	87	136.9	0.292	14.1539	2
P48960	CD97 antigen OS=Homo sapiens GN=CD97 PE=1 SV=4	2	6	2	91.809	2.478	1.575	1.27	1.31	0.66	0.34	63.3	156.7	99.7	80.3	0.425	17.9915	2
Q13261	Interleukin-15 receptor subunit alpha OS=Homo sapiens GN=IL15RA PE=1 SV=1	2	4	2	28.215	1.464	1.204	1.265	0.55	0.27	0.34	81.1	118.7	97.7	102.5	0.778	12.4261	2
P25815	Protein S100-P OS=Homo sapiens GN=S100P PE=1 SV=2	2	4	2	10.393	3.478	0.754	0.926	1.8	-0.41	-0.11	64.9	225.9	49	60.2	9	13.6258	2
O14773	Tripeptidyl-peptidase 1 OS=Homo sapiens GN=TPP1 PE=1 SV=2	2	6	2	61.21	1.202	1.24	1.275	0.27	0.31	0.35	84.8	101.9	105.2	108.1	0.304	25.9082	2
P35030	Trypsin-3 OS=Homo sapiens GN=PRSS3 PE=1 SV=2	2	3	2	32.508	3.185	3.342	0.809	1.67	1.74	-0.3	48	152.8	160.4	38.8	0.136	7.39795	2
P55145	Mesencephalic astrocyte-derived neurotrophic factor OS=Homo sapiens GN=MANF PE=1 SV=3	2	3	2	20.687	0.893	0.582	0.762	-0.16	-0.78	-0.39	123.6	110.3	71.9	94.2	0.585	8.67057	2
P11226	Mannose-binding protein C OS=Homo sapiens GN=MBL2 PE=1 SV=2	2	2	2	26.127	1.518	2.324	0.782	0.6	1.22	-0.35	71.1	108	165.3	55.6	0.359	4.79267	2
Q9BZG9	Ly-6/neurotoxin-like protein 1 OS=Homo sapiens GN=LYNX1 PE=1 SV=3	2	23	2	14.016	0.67	0.458	1.415	-0.58	-1.13	0.5	112.9	75.6	51.7	159.7	9	67.9754	2
Q9BQ51	Programmed cell death 1 ligand 2 OS=Homo sapiens GN=PDCD1LG2 PE=1 SV=2	2	4	2	30.937	0.176	0.393	0.596	-2.5	-1.35	-0.75	184.8	32.6	72.6	110.1	0.848	14.3436	2
P30041	Peroxiredoxin-6 OS=Homo sapiens GN=PRDX6 PE=1 SV=3	2	2	2	25.019	0.164	0.159	0.284	-2.61	-2.65	-1.82	249	40.8	39.6	70.7	0.334	5.96495	2
Q92484	Acid sphingomyelinase-like phosphodiesterase 3a OS=Homo sapiens GN=SMPDL3A PE=1 SV=2	2	2	2	51.228	1.13	0.903	1.108	0.18	-0.15	0.15	96.6	109.2	87.2	107	0.212	6.95227	2
Q15746	Myosin light chain kinase, smooth muscle OS=Homo sapiens GN=MYLK PE=1 SV=4	2	4	2	210.583	0.339	0.361	0.663	-1.56	-1.47	-0.59	169.2	57.4	61.1	112.3	0.067	12.2434	2
Q14393	Growth arrest-specific protein 6 OS=Homo sapiens GN=GAS6 PE=1 SV=2	2	2	2	79.625	0.724	0.899	1.244	-0.47	-0.15	0.32	103.5	74.9	93	128.7	0.103	5.60683	2
Q9NY97	UDP-GlcNAc:betaGal beta-1,3-N-acetylglucosaminyltransferase 2 OS=Homo sapiens GN=B3GNT2 PE=1 SV=2	2	2	2	45.993	0.342	0.475	0.853	-1.55	-1.07	-0.23	149.8	51.2	71.2	127.8	0.202	6.25826	2
P30047	GTP cyclohydrolase 1 feedback regulatory protein OS=Homo sapiens GN=GCHFR PE=1 SV=3	2	27	2	9.692	1.181	0.906	1.001	0.24	-0.14	0	97.8	115.6	88.7	97.9	561.341	56.6701	2
O43567	E3 ubiquitin-protein ligase RNF13 OS=Homo sapiens GN=RNF13 PE=1 SV=1	2	5	2	42.787	1.177	0.8	1.173	0.24	-0.32	0.23	96.4	113.4	77.1	113.1	0.778	20.9635	2
Q96PX8	SLIT and NTRK-like protein 1 OS=Homo sapiens GN=SLITRK1 PE=1 SV=2	2	2	2	77.686	1.716	1.354	1.162	0.78	0.44	0.22	76.5	131.2	103.5	88.9	0.129	6.64445	2
P05783	Keratin, type I cytoskeletal 18 OS=Homo sapiens GN=KRT18 PE=1 SV=2	3	8	2	48.029	1.065	0.966	0.808	0.09	-0.05	-0.31	104.2	111	100.7	84.2	0.259	23.0702	3
Q96J84	Kin of IRRE-like protein 1 OS=Homo sapiens GN=KIRREL PE=1 SV=2	2	3	2	83.484	0.423	0.386	0.698	-1.24	-1.37	-0.52	159.5	67.5	61.7	111.3	0.166	10.6417	2
Q6ISS4	Leukocyte-associated immunoglobulin-like receptor 2 OS=Homo sapiens GN=LAIR2 PE=2 SV=1	3	7	2	16.27	1.222	0.848	1.22	0.29	-0.24	0.29	93.2	113.9	79.1	113.8	2.162	22.013	3
Q13591	Semaphorin-5A OS=Homo sapiens GN=SEMA5A PE=1 SV=3	2	4	2	120.537	1.055	0.867	0.785	0.08	-0.21	-0.35	107.9	113.8	93.6	84.7	0.093	12.28	2
Q5FWE3	Proline-rich transmembrane protein 3 OS=Homo sapiens GN=PRRT3 PE=1 SV=3	2	2	2	102.134	1.241	0.751	0.812	0.31	-0.41	-0.3	105.1	130.5	79	85.4	0.122	5.51805	2
Q6UWL2	Sushi domain-containing protein 1 OS=Homo sapiens GN=SUSD1 PE=1 SV=1	2	2	2	82.656	1.532	1.109	1.041	0.62	0.15	0.06	85.4	130.9	94.7	88.9	0.122	5.62334	2
P07305	Histone H1.0 OS=Homo sapiens GN=H1F0 PE=1 SV=3	2	2	2	20.85	0.389	0.303	0.292	-1.36	-1.72	-1.78	201.6	78.4	61.1	58.9	0.778	6.11764	2
P01616	Ig kappa chain V-II region MIL OS=Homo sapiens PE=1 SV=1	2	4	2	12.048	1.026	2.051	1.292	0.04	1.04	0.37	74.5	76.4	152.8	96.3	2.981	11.6924	2
Q9UNN8	Endothelial protein C receptor OS=Homo sapiens GN=PROCR PE=1 SV=1	2	21	2	26.655	0.512	0.54	0.525	-0.97	-0.89	-0.93	155.2	79.5	83.8	81.5	1.031	58.9093	2
O95971	CD160 antigen OS=Homo sapiens GN=CD160 PE=2 SV=1	2	4	2	19.797	0.467	0.528	0.671	-1.1	-0.92	-0.58	150	70	79.2	100.7	1.154	13.1451	2
Q9NZD4	Alpha-hemoglobin-stabilizing protein OS=Homo sapiens GN=AHSP PE=1 SV=1	2	3	2	11.833	0.478	0.282	0.294	-1.06	-1.83	-1.77	194.8	93.1	54.9	57.2	1.154	9.35516	2
P01714	Ig lambda chain V-III region SH OS=Homo sapiens PE=1 SV=1	2	3	2	11.386	0.942	1.556	0.844	-0.09	0.64	-0.25	92.1	86.8	143.4	77.7	1.154	6.87331	2
P20138	Myeloid cell surface antigen CD33 OS=Homo sapiens GN=CD33 PE=1 SV=2	2	4	2	39.8	0.823	0.732	0.819	-0.28	-0.45	-0.29	118.6	97.6	86.8	97.1	0.501	12.3179	2
P08729	Keratin, type II cytoskeletal 7 OS=Homo sapiens GN=KRT7 PE=1 SV=5	5	7	2	51.354	1.284	1.227	0.901	0.36	0.3	-0.15	90.7	116.4	111.2	81.7	0.389	21.859	5
O96009	Napsin-A OS=Homo sapiens GN=NAPSA PE=1 SV=1	2	3	2	45.358	0.772	0.954	0.929	-0.37	-0.07	-0.11	109.5	84.5	104.4	101.7	0.501	9.82872	2
Q8IV08	Phospholipase D3 OS=Homo sapiens GN=PLD3 PE=1 SV=1	2	2	2	54.671	0.349	0.41	0.731	-1.52	-1.29	-0.45	160.6	56.1	65.9	117.5	0.233	7.08101	2
Q9UIB8	SLAM family member 5 OS=Homo sapiens GN=CD84 PE=1 SV=1	2	4	2	38.758	0.409	0.487	0.792	-1.29	-1.04	-0.34	148.8	60.9	72.4	117.9	0.468	14.6761	2
P01613	Ig kappa chain V-I region Ni OS=Homo sapiens PE=1 SV=1	2	5	2	12.238	1.163	1.872	0.708	0.22	0.9	-0.5	84.3	98.1	157.9	59.7	2.162	16.441	2
P35754	Glutaredoxin-1 OS=Homo sapiens GN=GLRX PE=1 SV=2	2	4	2	11.768	0.951	1.039	0.722	-0.07	0.06	-0.47	107.7	102.5	112	77.8	3.642	12.2846	2
P22455	Fibroblast growth factor receptor 4 OS=Homo sapiens GN=FGFR4 PE=1 SV=2	2	2	2	87.899	0.655	0.845	0.807	-0.61	-0.24	-0.31	121	79.2	102.2	97.6	0.119	7.09749	2
Q96PC5	Melanoma inhibitory activity protein 2 OS=Homo sapiens GN=MIA2 PE=2 SV=3	2	2	2	61.733	0.407	0.425	1.019	-1.3	-1.23	0.03	140.3	57	59.7	143	0.172	6.31186	2
Q92626	Peroxidasin homolog OS=Homo sapiens GN=PXDN PE=1 SV=2	2	2	2	165.17	2.453	1.325	1.433	1.29	0.41	0.52	64.4	158	85.3	92.3	0.056	5.48978	2
Q9H741	UPF0454 protein C12orf49 OS=Homo sapiens GN=C12orf49 PE=2 SV=1	2	2	2	23.579	5.261	2.181	0.938	2.4	1.12	-0.09	42.6	224.4	93	40	0.468	5.20766	2
P53990	IST1 homolog OS=Homo sapiens GN=IST1 PE=1 SV=1	2	3	2	39.725	0.58	0.613	0.507	-0.79	-0.71	-0.98	148.2	85.9	90.8	75.1	0.501	10.5797	2
Q8TCT8	Signal peptide peptidase-like 2A OS=Homo sapiens GN=SPPL2A PE=1 SV=2	2	5	2	58.104	1.103	0.73	1.223	0.14	-0.45	0.29	98.6	108.8	72	120.6	0.389	17.8078	2
P20160	Azurocidin OS=Homo sapiens GN=AZU1 PE=1 SV=3	2	6	2	26.869	2.145	0.739	0.694	1.1	-0.44	-0.53	87.4	187.4	64.6	60.6	1.154	22.4386	2
P63104	14-3-3 protein zeta/delta OS=Homo sapiens GN=YWHAZ PE=1 SV=1	2	2	2	27.728	0.576	0.562	0.469	-0.8	-0.83	-1.09	153.4	88.4	86.3	71.9	0.274	6.3385	2
Q12929	Epidermal growth factor receptor kinase substrate 8 OS=Homo sapiens GN=EPS8 PE=1 SV=1	2	2	2	91.824	0.765	0.782	0.712	-0.39	-0.36	-0.49	122.7	93.9	95.9	87.4	0.108	4.60497	2
P13598	Intercellular adhesion molecule 2 OS=Homo sapiens GN=ICAM2 PE=1 SV=2	2	4	2	30.635	0.113	0.256	0.943	-3.15	-1.97	-0.08	173	19.5	44.3	163.2	0.468	9.91728	2
Q9BXN2	C-type lectin domain family 7 member A OS=Homo sapiens GN=CLEC7A PE=1 SV=1	2	2	2	27.61	0.86	0.963	0.831	-0.22	-0.05	-0.27	109.5	94.2	105.4	91	0.468	8.23524	2
Q9BRF8	Calcineurin-like phosphoesterase domain-containing protein 1 OS=Homo sapiens GN=CPPED1 PE=1 SV=3	2	2	2	35.526	0.441	0.303	0.531	-1.18	-1.72	-0.91	175.9	77.5	53.3	93.3	0.274	6.91349	2

## Sheet: Run 2
Accession	Description	# Peptides	# PSMs	# Unique Peptides	MW [kDa]	calc. pI	Abundance Ratio: (115) / (114)	Abundance Ratio: (116) / (114)	Abundance Ratio: (117) / (114)	Abundance Ratio (log2): (115) / (114)	Abundance Ratio (log2): (116) / (114)	Abundance Ratio (log2): (117) / (114)	Abundances (Grouped): 114	Abundances (Grouped): 115	Abundances (Grouped): 116	Abundances (Grouped): 117	emPAI	Score Sequest HT	# Peptides Sequest HT
P02768	Serum albumin OS=Homo sapiens GN=ALB PE=1 SV=2	78	3044	78	69.321	6.28	1.043	1.394	0.897	0.06	0.48	-0.16	92.3	96.2	128.7	82.8	896150	9781.62	78
P98160	Basement membrane-specific heparan sulfate proteoglycan core protein OS=Homo sapiens GN=HSPG2 PE=1 SV=4	60	214	60	468.532	6.51	0.706	0.643	0.943	-0.5	-0.64	-0.09	121.5	85.8	78.1	114.6	1.868	752.934	60
P35555	Fibrillin-1 OS=Homo sapiens GN=FBN1 PE=1 SV=3	57	199	57	312.022	4.93	1.598	1.216	1.157	0.68	0.28	0.21	80.5	128.6	97.8	93.1	2.633	579.792	57
P02751	Fibronectin OS=Homo sapiens GN=FN1 PE=1 SV=4	52	205	52	262.46	5.71	2.118	1.48	1.154	1.08	0.57	0.21	69.5	147.3	102.9	80.3	6.176	596.006	52
P02787	Serotransferrin OS=Homo sapiens GN=TF PE=1 SV=3	49	359	49	77.014	7.12	0.84	1.123	1.167	-0.25	0.17	0.22	96.9	81.4	108.7	113	513.175	1236.27	49
P02788	Lactotransferrin OS=Homo sapiens GN=LTF PE=1 SV=6	43	270	43	78.132	8.12	2.315	0.59	0.871	1.21	-0.76	-0.2	83.8	193.9	49.4	72.9	103.914	826.41	43
P00450	Ceruloplasmin OS=Homo sapiens GN=CP PE=1 SV=1	40	439	40	122.128	5.72	1.069	0.735	2.004	0.1	-0.44	1	83.2	88.9	61.2	166.7	157.489	1442.6	40
P43652	Afamin OS=Homo sapiens GN=AFM PE=1 SV=1	39	480	39	69.024	5.9	1.194	1.594	1.796	0.26	0.67	0.84	71.6	85.5	114.2	128.7	214.443	1355.97	39
O43451	Maltase-glucoamylase, intestinal OS=Homo sapiens GN=MGAM PE=1 SV=5	39	135	39	209.72	5.5	0.739	0.557	1.275	-0.44	-0.84	0.35	112	82.8	62.4	142.9	5.373	418.564	39
P08603	Complement factor H OS=Homo sapiens GN=CFH PE=1 SV=4	40	149	38	139.005	6.61	1.112	2.369	0.83	0.15	1.24	-0.27	75.3	83.8	178.4	62.5	14.431	430.976	40
P22105	Tenascin-X OS=Homo sapiens GN=TNXB PE=1 SV=3	38	77	38	464.034	5.34	1.169	0.899	0.948	0.22	-0.15	-0.08	99.6	116.4	89.5	94.5	0.778	262.282	38
Q9Y6R7	IgGFc-binding protein OS=Homo sapiens GN=FCGBP PE=1 SV=3	33	85	33	571.639	5.34	3.117	1.335	1.09	1.64	0.42	0.12	61.1	190.6	81.6	66.6	0.872	248.352	33
P02774	Vitamin D-binding protein OS=Homo sapiens GN=GC PE=1 SV=1	30	334	30	52.929	5.54	2.224	3.159	1.331	1.15	1.66	0.41	51.9	115.3	163.8	69	528.832	1129.38	30
O75882	Attractin OS=Homo sapiens GN=ATRN PE=1 SV=2	30	152	30	158.432	7.31	0.67	0.754	0.838	-0.58	-0.41	-0.25	122.6	82.2	92.5	102.8	9.308	449.686	30
P25311	Zinc-alpha-2-glycoprotein OS=Homo sapiens GN=AZGP1 PE=1 SV=2	29	1095	29	34.237	6.05	0.995	0.609	1.574	-0.01	-0.72	0.65	95.8	95.2	58.3	150.7	99999	3351.15	29
P00747	Plasminogen OS=Homo sapiens GN=PLG PE=1 SV=2	29	76	29	90.51	7.24	1.2	1.792	1.517	0.26	0.84	0.6	72.6	87.1	130.1	110.1	11.649	239.641	29
P01042	Kininogen-1 OS=Homo sapiens GN=KNG1 PE=1 SV=2	28	432	28	71.912	6.81	0.4	0.347	0.556	-1.32	-1.53	-0.85	173.7	69.4	60.3	96.6	65.147	1165.96	28
P04040	Catalase OS=Homo sapiens GN=CAT PE=1 SV=3	28	121	28	59.719	7.39	0.435	0.256	0.259	-1.2	-1.97	-1.95	205.1	89.3	52.5	53.1	64.793	394.791	28
O60494	Cubilin OS=Homo sapiens GN=CUBN PE=1 SV=5	28	62	28	398.48	5.35	0.783	0.707	0.885	-0.35	-0.5	-0.18	118.6	92.8	83.8	104.9	0.869	200.91	28
P0C0L4	Complement C4-A OS=Homo sapiens GN=C4A PE=1 SV=1	28	69	28	192.65	7.08	1.26	3.53	0.759	0.33	1.82	-0.4	61.1	77	215.6	46.4	1.805	226.618	28
P01024	Complement C3 OS=Homo sapiens GN=C3 PE=1 SV=2	27	61	27	187.03	6.4	1.522	2.366	0.966	0.61	1.24	-0.05	68.3	104	161.6	66	1.328	180.74	27
P01008	Antithrombin-III OS=Homo sapiens GN=SERPINC1 PE=1 SV=1	25	177	25	52.569	6.71	1.642	2.417	0.867	0.72	1.27	-0.21	67.5	110.8	163.2	58.5	78.433	574.56	25
Q6W4X9	Mucin-6 OS=Homo sapiens GN=MUC6 PE=1 SV=3	25	48	25	256.887	7.39	1.792	0.919	1.631	0.84	-0.12	0.71	74.9	134.2	68.8	122.1	1.757	130.788	25
P07911	Uromodulin OS=Homo sapiens GN=UMOD PE=1 SV=1	24	475	24	69.714	5.24	0.676	0.504	0.709	-0.56	-0.99	-0.5	138.4	93.6	69.8	98.1	57.171	1455.33	24
P01833	Polymeric immunoglobulin receptor OS=Homo sapiens GN=PIGR PE=1 SV=4	23	176	23	83.232	5.74	0.646	0.804	0.999	-0.63	-0.32	0	116	74.9	93.2	115.9	13.454	572.692	23
P04264	Keratin, type II cytoskeletal 1 OS=Homo sapiens GN=KRT1 PE=1 SV=6	28	105	23	65.999	8.12	1.651	2.215	1.034	0.72	1.15	0.05	67.8	111.9	150.2	70.1	20.984	355.965	28
Q14624	Inter-alpha-trypsin inhibitor heavy chain H4 OS=Homo sapiens GN=ITIH4 PE=1 SV=4	23	60	23	103.293	6.98	0.801	1.212	0.679	-0.32	0.28	-0.56	108.3	86.8	131.3	73.6	5.31	209.067	23
P05164	Myeloperoxidase OS=Homo sapiens GN=MPO PE=1 SV=1	23	61	23	83.815	8.97	1.404	0.443	0.537	0.49	-1.17	-0.9	118.2	165.9	52.4	63.5	4.429	169.7	23
P04279	Semenogelin-1 OS=Homo sapiens GN=SEMG1 PE=1 SV=2	26	141	22	52.1	9.29	0.639	0.291	0.79	-0.65	-1.78	-0.34	147.1	94	42.8	116.2	50.795	462.031	26
P02790	Hemopexin OS=Homo sapiens GN=HPX PE=1 SV=2	22	255	22	51.643	7.02	1.385	1.981	1.271	0.47	0.99	0.35	71	98.3	140.6	90.2	99	837.687	22
P35908	Keratin, type II cytoskeletal 2 epidermal OS=Homo sapiens GN=KRT2 PE=1 SV=2	29	93	22	65.393	8	1.584	2.059	0.87	0.66	1.04	-0.2	72.6	115	149.4	63.1	16.083	303.688	29
P07602	Proactivator polypeptide OS=Homo sapiens GN=PSAP PE=1 SV=2	22	235	22	58.074	5.17	1.485	0.955	1.501	0.57	-0.07	0.59	81	120.2	77.3	121.5	35.21	550.209	22
O00468	Agrin OS=Homo sapiens GN=AGRN PE=1 SV=4	22	47	22	214.706	6.4	1.345	1.439	1.003	0.43	0.52	0	83.6	112.4	120.2	83.8	1.186	159.4	22
P01023	Alpha-2-macroglobulin OS=Homo sapiens GN=A2M PE=1 SV=3	22	37	22	163.188	6.46	1.186	1.617	0.672	0.25	0.69	-0.57	89.4	106	144.5	60.1	1.388	108.053	22
P02760	Protein AMBP OS=Homo sapiens GN=AMBP PE=1 SV=1	21	1628	21	38.974	6.25	1.592	2.136	1.323	0.67	1.1	0.4	66.1	105.2	141.2	87.5	215442	4402.98	21
P01009	Alpha-1-antitrypsin OS=Homo sapiens GN=SERPINA1 PE=1 SV=3	21	165	21	46.707	5.59	0.919	1.273	1.287	-0.12	0.35	0.36	89.3	82.1	113.7	114.9	128.155	567.607	21
P01133	Pro-epidermal growth factor OS=Homo sapiens GN=EGF PE=1 SV=2	21	89	21	133.906	5.85	0.75	0.525	0.824	-0.41	-0.93	-0.28	129	96.8	67.8	106.3	2.636	303.026	21
P24821	Tenascin OS=Homo sapiens GN=TNC PE=1 SV=3	21	50	21	240.7	4.89	1.549	1.275	0.915	0.63	0.35	-0.13	84.4	130.7	107.6	77.2	1.003	171.168	21
P21333	Filamin-A OS=Homo sapiens GN=FLNA PE=1 SV=4	21	54	21	280.564	6.06	1.659	1.028	1.032	0.73	0.04	0.04	84.8	140.6	87.1	87.5	0.699	179.334	21
Q02383	Semenogelin-2 OS=Homo sapiens GN=SEMG2 PE=1 SV=1	24	176	20	65.405	9.07	0.76	0.376	0.811	-0.4	-1.41	-0.3	135.7	103.2	51	110.1	40.596	493.853	24
P00734	Prothrombin OS=Homo sapiens GN=F2 PE=1 SV=2	20	207	20	69.992	5.9	0.958	1.127	1.015	-0.06	0.17	0.02	97.6	93.5	110	99	36.276	686.795	20
P10253	Lysosomal alpha-glucosidase OS=Homo sapiens GN=GAA PE=1 SV=4	20	170	20	105.257	6	0.544	0.448	0.815	-0.88	-1.16	-0.29	142.5	77.5	63.9	116.1	15.379	502.944	20
P00738	Haptoglobin OS=Homo sapiens GN=HP PE=1 SV=1	20	90	20	45.177	6.58	0.694	1.111	0.73	-0.53	0.15	-0.45	113.2	78.5	125.7	82.6	53.844	251.545	20
Q9BXP8	Pappalysin-2 OS=Homo sapiens GN=PAPPA2 PE=1 SV=4	20	57	20	198.411	5.47	0.778	0.949	0.657	-0.36	-0.07	-0.61	118.2	91.9	112.2	77.6	1.801	154.965	20
P13645	Keratin, type I cytoskeletal 10 OS=Homo sapiens GN=KRT10 PE=1 SV=6	23	86	18	58.792	5.21	1.798	2.401	1.104	0.85	1.26	0.14	63.5	114.1	152.4	70.1	23.709	306.993	23
P08174	Complement decay-accelerating factor OS=Homo sapiens GN=CD55 PE=1 SV=4	18	163	18	41.374	7.59	1.152	1.279	1.207	0.2	0.36	0.27	86.2	99.3	110.3	104.1	51.481	428.002	18
Q99715	Collagen alpha-1(XII) chain OS=Homo sapiens GN=COL12A1 PE=1 SV=2	18	55	18	332.941	5.53	0.973	0.776	0.86	-0.04	-0.37	-0.22	110.8	107.9	86	95.3	0.643	156.22	18
P00751	Complement factor B OS=Homo sapiens GN=CFB PE=1 SV=2	18	84	18	85.479	7.06	1.335	2.757	0.979	0.42	1.46	-0.03	65.9	88	181.7	64.5	6.139	244.422	18
P10643	Complement component C7 OS=Homo sapiens GN=C7 PE=1 SV=2	18	50	18	93.457	6.48	1.613	1.947	1.071	0.69	0.96	0.1	71	114.6	138.3	76.1	3.498	163.418	18
Q14515	SPARC-like protein 1 OS=Homo sapiens GN=SPARCL1 PE=1 SV=2	18	50	18	75.161	4.81	0.563	0.596	1.281	-0.83	-0.75	0.36	116.3	65.4	69.3	148.9	5.158	168.932	18
P35527	Keratin, type I cytoskeletal 9 OS=Homo sapiens GN=KRT9 PE=1 SV=3	19	62	18	62.027	5.24	1.807	2.41	0.914	0.85	1.27	-0.13	65.2	117.9	157.2	59.7	6.128	214.049	19
P98164	Low-density lipoprotein receptor-related protein 2 OS=Homo sapiens GN=LRP2 PE=1 SV=3	18	36	18	521.616	5.08	0.975	0.932	1.049	-0.04	-0.1	0.07	101.1	98.6	94.2	106.1	0.271	109.414	18
Q92896	Golgi apparatus protein 1 OS=Homo sapiens GN=GLG1 PE=1 SV=2	18	25	18	134.464	6.9	0.826	0.625	0.774	-0.28	-0.68	-0.37	124.1	102.4	77.6	96	1.041	74.9368	18
Q16270	Insulin-like growth factor-binding protein 7 OS=Homo sapiens GN=IGFBP7 PE=1 SV=1	17	207	16	29.111	7.9	1.046	0.513	0.886	0.07	-0.96	-0.17	116.1	121.5	59.6	102.9	442.669	740.417	17
Q12805	EGF-containing fibulin-like extracellular matrix protein 1 OS=Homo sapiens GN=EFEMP1 PE=1 SV=2	16	72	16	54.604	5.07	1.138	1.625	0.941	0.19	0.7	-0.09	85	96.7	138.2	80	21.19	215.026	16
P01011	Alpha-1-antichymotrypsin OS=Homo sapiens GN=SERPINA3 PE=1 SV=2	16	86	16	47.621	5.52	0.862	1.578	1.242	-0.21	0.66	0.31	85.4	73.6	134.8	106.1	22.714	249.169	16
P12109	Collagen alpha-1(VI) chain OS=Homo sapiens GN=COL6A1 PE=1 SV=3	16	52	16	108.462	5.43	0.303	0.368	0.49	-1.72	-1.44	-1.03	185.1	56	68.2	90.7	2.103	177.516	16
Q8NBJ4	Golgi membrane protein 1 OS=Homo sapiens GN=GOLM1 PE=1 SV=1	16	43	16	45.306	4.97	0.375	0.324	0.566	-1.42	-1.62	-0.82	176.6	66.2	57.3	99.9	6.943	143.385	16
P13646	Keratin, type I cytoskeletal 13 OS=Homo sapiens GN=KRT13 PE=1 SV=4	22	63	16	49.557	4.96	0.453	0.506	0.98	-1.14	-0.98	-0.03	136.1	61.6	68.9	133.4	8.306	201.39	22
P00749	Urokinase-type plasminogen activator OS=Homo sapiens GN=PLAU PE=1 SV=2	15	53	15	48.476	8.41	0.477	0.427	0.687	-1.07	-1.23	-0.54	154.3	73.6	66	106.1	13.251	169.82	15
P10909	Clusterin OS=Homo sapiens GN=CLU PE=1 SV=1	15	59	15	52.461	6.27	1.114	1.293	1.014	0.16	0.37	0.02	90.5	100.8	117	91.7	12.503	198.96	15
Q9Y2E5	Epididymis-specific alpha-mannosidase OS=Homo sapiens GN=MAN2B2 PE=1 SV=4	15	27	15	113.908	7.24	0.756	0.576	0.921	-0.4	-0.79	-0.12	122.9	92.9	70.9	113.2	2.082	88.5824	15
Q9HC84	Mucin-5B OS=Homo sapiens GN=MUC5B PE=1 SV=3	15	24	15	595.96	6.64	1.477	0.49	0.441	0.56	-1.03	-1.18	117.4	173.4	57.5	51.8	0.265	79.5898	15
Q16610	Extracellular matrix protein 1 OS=Homo sapiens GN=ECM1 PE=1 SV=2	15	37	15	60.635	6.71	2.45	1.68	1.835	1.29	0.75	0.88	57.4	140.7	96.5	105.4	3.146	114.324	15
O43278	Kunitz-type protease inhibitor 1 OS=Homo sapiens GN=SPINT1 PE=1 SV=2	15	32	15	58.36	6.29	1.011	1.01	0.84	0.02	0.01	-0.25	103.6	104.7	104.6	87	5.629	92.5182	15
P04217	Alpha-1B-glycoprotein OS=Homo sapiens GN=A1BG PE=1 SV=4	14	441	14	54.22	5.86	0.563	0.83	1.459	-0.83	-0.27	0.54	103.8	58.5	86.2	151.5	516.947	1519.45	14
P10451	Osteopontin OS=Homo sapiens GN=SPP1 PE=1 SV=1	14	179	14	35.401	4.58	0.273	0.354	0.457	-1.87	-1.5	-1.13	191.9	52.4	67.9	87.8	12114.3	436.686	14
P19022	Cadherin-2 OS=Homo sapiens GN=CDH2 PE=1 SV=4	14	68	14	99.747	4.81	0.709	0.506	0.702	-0.5	-0.98	-0.51	137.1	97.2	69.4	96.2	6.897	211.437	14
P05156	Complement factor I OS=Homo sapiens GN=CFI PE=1 SV=2	14	57	14	65.707	7.5	0.867	1.439	0.681	-0.21	0.53	-0.56	100.3	87	144.4	68.3	9	184.691	14
P14384	Carboxypeptidase M OS=Homo sapiens GN=CPM PE=1 SV=2	14	52	14	50.481	7.36	0.401	0.365	0.877	-1.32	-1.45	-0.19	151.4	60.7	55.2	132.7	13.251	155.161	14
Q13228	Selenium-binding protein 1 OS=Homo sapiens GN=SELENBP1 PE=1 SV=2	14	40	14	52.358	6.37	0.753	0.46	0.674	-0.41	-1.12	-0.57	138.6	104.3	63.7	93.4	5.898	131.073	14
P19835	Bile salt-activated lipase OS=Homo sapiens GN=CEL PE=1 SV=3	14	33	14	79.272	5.34	0.609	0.366	0.986	-0.72	-1.45	-0.02	135.1	82.3	49.5	133.2	4.505	109.391	14
P11142	Heat shock cognate 71 kDa protein OS=Homo sapiens GN=HSPA8 PE=1 SV=1	15	23	14	70.854	5.52	0.715	0.585	0.808	-0.48	-0.77	-0.31	128.7	92.1	75.3	104	2.257	69.7057	15
P12111	Collagen alpha-3(VI) chain OS=Homo sapiens GN=COL6A3 PE=1 SV=5	14	28	14	343.457	6.68	1.006	1.292	0.943	0.01	0.37	-0.08	94.3	94.9	121.8	88.9	0.241	86.6257	14
Q12860	Contactin-1 OS=Homo sapiens GN=CNTN1 PE=1 SV=1	14	19	14	113.249	5.9	1.062	1.029	0.735	0.09	0.04	-0.44	104.5	111.1	107.6	76.8	0.951	51.8873	14
P19823	Inter-alpha-trypsin inhibitor heavy chain H2 OS=Homo sapiens GN=ITIH2 PE=1 SV=2	14	23	14	106.397	6.86	1.487	1.564	0.966	0.57	0.64	-0.05	79.7	118.6	124.7	77	1.069	70.7583	14
P15586	N-acetylglucosamine-6-sulfatase OS=Homo sapiens GN=GNS PE=1 SV=3	13	100	13	62.042	8.31	0.723	0.423	1.495	-0.47	-1.24	0.58	109.8	79.4	46.5	164.2	18.953	342.68	13
P02749	Beta-2-glycoprotein 1 OS=Homo sapiens GN=APOH PE=1 SV=3	13	125	13	38.273	7.97	0.998	2.02	0.925	0	1.01	-0.11	80.9	80.8	163.4	74.9	87.587	433.215	13
P23142	Fibulin-1 OS=Homo sapiens GN=FBLN1 PE=1 SV=4	13	56	13	77.162	5.22	2.013	1.636	1.212	1.01	0.71	0.28	68.2	137.4	111.7	82.7	5.543	174.579	13
P02671	Fibrinogen alpha chain OS=Homo sapiens GN=FGA PE=1 SV=2	13	40	13	94.914	6.01	0.781	2.201	0.638	-0.36	1.14	-0.65	86.6	67.6	190.5	55.3	2.495	120.198	13
Q14766	Latent-transforming growth factor beta-binding protein 1 OS=Homo sapiens GN=LTBP1 PE=1 SV=4	13	38	13	186.673	5.96	1.579	1.245	1.159	0.66	0.32	0.21	80.3	126.8	99.9	93	0.878	97.7962	13
P54802	Alpha-N-acetylglucosaminidase OS=Homo sapiens GN=NAGLU PE=1 SV=2	13	26	13	82.214	6.65	0.499	0.466	0.874	-1	-1.1	-0.19	140.9	70.3	65.7	123.1	1.985	85.3147	13
Q9HAT2	Sialate O-acetylesterase OS=Homo sapiens GN=SIAE PE=1 SV=1	13	32	13	58.277	7.33	0.517	0.469	0.984	-0.95	-1.09	-0.02	134.7	69.6	63.1	132.5	3.532	83.3813	13
P13647	Keratin, type II cytoskeletal 5 OS=Homo sapiens GN=KRT5 PE=1 SV=3	22	56	12	62.34	7.74	1.187	1.536	1.499	0.25	0.62	0.58	76.6	90.9	117.7	114.8	12.895	183.074	22
P07339	Cathepsin D OS=Homo sapiens GN=CTSD PE=1 SV=1	12	94	12	44.524	6.54	1.096	0.941	1.109	0.13	-0.09	0.15	96.5	105.8	90.8	107	32.246	239.661	12
P12830	Cadherin-1 OS=Homo sapiens GN=CDH1 PE=1 SV=3	13	82	12	97.396	4.73	0.851	1.096	1.076	-0.23	0.13	0.11	99.4	84.6	109	106.9	5.543	271.958	13
P18065	Insulin-like growth factor-binding protein 2 OS=Homo sapiens GN=IGFBP2 PE=1 SV=2	12	50	12	34.791	7.5	0.661	0.625	0.985	-0.6	-0.68	-0.02	122.3	80.8	76.4	120.4	15.876	171.404	12
Q04756	Hepatocyte growth factor activator OS=Homo sapiens GN=HGFAC PE=1 SV=1	12	37	12	70.636	7.24	1.122	1.192	1.373	0.17	0.25	0.46	85.3	95.8	101.8	117.1	3.329	120.09	12
Q14767	Latent-transforming growth factor beta-binding protein 2 OS=Homo sapiens GN=LTBP2 PE=1 SV=3	12	26	12	194.923	5.19	1.302	0.859	1.163	0.38	-0.22	0.22	92.5	120.4	79.5	107.6	0.856	108.567	12
Q9HCU0	Endosialin OS=Homo sapiens GN=CD248 PE=1 SV=1	12	42	12	80.807	5.35	0.986	0.747	0.835	-0.02	-0.42	-0.26	112.1	110.5	83.8	93.6	3.146	142.754	12
Q9ULI3	Protein HEG homolog 1 OS=Homo sapiens GN=HEG1 PE=1 SV=3	12	29	12	147.369	6.18	0.331	0.327	0.473	-1.6	-1.61	-1.08	187.8	62.1	61.3	88.8	0.903	96.2248	12
P28799	Granulins OS=Homo sapiens GN=GRN PE=1 SV=2	12	41	12	63.5	6.83	1.419	0.935	1.056	0.5	-0.1	0.08	90.7	128.7	84.8	95.8	4.623	115.546	12
Q02487	Desmocollin-2 OS=Homo sapiens GN=DSC2 PE=1 SV=1	12	23	12	99.899	5.34	0.868	1.043	0.748	-0.2	0.06	-0.42	109.3	94.9	114	81.8	1.291	76.7621	12
Q9NZV1	Cysteine-rich motor neuron 1 protein OS=Homo sapiens GN=CRIM1 PE=1 SV=1	12	20	12	113.66	5.21	1.173	0.785	1	0.23	-0.35	0	101.1	118.6	79.3	101	1.188	61.9094	12
P02679	Fibrinogen gamma chain OS=Homo sapiens GN=FGG PE=1 SV=3	12	26	12	51.479	5.62	1.068	3.25	0.755	0.09	1.7	-0.41	65.9	70.3	214.1	49.7	2.562	68.816	12
P11047	Laminin subunit gamma-1 OS=Homo sapiens GN=LAMC1 PE=1 SV=3	12	16	12	177.489	5.12	1.412	0.811	0.97	0.5	-0.3	-0.04	95.4	134.7	77.4	92.5	0.461	47.2473	12
P55287	Cadherin-11 OS=Homo sapiens GN=CDH11 PE=1 SV=2	12	25	12	87.911	4.91	0.473	0.475	0.679	-1.08	-1.07	-0.56	152.2	72	72.3	103.4	1.54	65.0864	12
P00915	Carbonic anhydrase 1 OS=Homo sapiens GN=CA1 PE=1 SV=2	11	140	11	28.852	7.12	0.252	0.308	0.434	-1.99	-1.7	-1.2	200.5	50.6	61.8	87	463.159	359.39	11
Q01459	Di-N-acetylchitobiase OS=Homo sapiens GN=CTBS PE=1 SV=1	11	109	11	43.732	6.64	1.22	1.089	1.03	0.29	0.12	0.04	92.2	112.4	100.4	95	45.416	344.076	11
P19320	Vascular cell adhesion protein 1 OS=Homo sapiens GN=VCAM1 PE=1 SV=1	11	67	11	81.224	5.22	1.156	2.198	1.364	0.21	1.14	0.45	70	80.9	153.8	95.4	4.065	226.716	11
Q8NFZ8	Cell adhesion molecule 4 OS=Homo sapiens GN=CADM4 PE=1 SV=1	11	47	11	42.759	6.3	0.454	0.403	0.813	-1.14	-1.31	-0.3	149.8	68.1	60.4	121.8	28.552	141.911	11
P55290	Cadherin-13 OS=Homo sapiens GN=CDH13 PE=1 SV=1	11	66	11	78.238	4.98	0.43	0.387	1.032	-1.22	-1.37	0.05	140.4	60.4	54.4	144.9	4.179	226.21	11
Q08380	Galectin-3-binding protein OS=Homo sapiens GN=LGALS3BP PE=1 SV=1	11	47	11	65.289	5.27	1.21	1.195	1.095	0.27	0.26	0.13	88.9	107.5	106.2	97.4	3.977	170.655	11
P16278	Beta-galactosidase OS=Homo sapiens GN=GLB1 PE=1 SV=2	12	58	11	76.027	6.57	0.835	0.622	1.164	-0.26	-0.68	0.22	110.5	92.2	68.7	128.6	4.736	164.574	12
P05452	Tetranectin OS=Homo sapiens GN=CLEC3B PE=1 SV=3	11	39	11	22.522	5.67	0.471	0.521	0.625	-1.09	-0.94	-0.68	152.8	72	79.6	95.6	55.234	145.812	11
Q9NQ38	Serine protease inhibitor Kazal-type 5 OS=Homo sapiens GN=SPINK5 PE=1 SV=2	11	38	11	120.637	8.06	0.915	0.922	0.871	-0.13	-0.12	-0.2	107.9	98.7	99.4	94	1.326	94.4978	11
Q13332	Receptor-type tyrosine-protein phosphatase S OS=Homo sapiens GN=PTPRS PE=1 SV=3	12	26	11	216.905	6.46	1.19	1.18	1.055	0.25	0.24	0.08	90.4	107.6	106.7	95.4	0.564	81.2421	12
P06396	Gelsolin OS=Homo sapiens GN=GSN PE=1 SV=1	11	53	11	85.644	6.28	0.304	0.335	0.663	-1.72	-1.58	-0.59	173.8	52.8	58.2	115.3	2.075	177.01	11
Q12913	Receptor-type tyrosine-protein phosphatase eta OS=Homo sapiens GN=PTPRJ PE=1 SV=3	11	27	11	145.851	5.58	1.049	0.938	0.828	0.07	-0.09	-0.27	104.9	110	98.4	86.8	0.84	87.4327	11
P02675	Fibrinogen beta chain OS=Homo sapiens GN=FGB PE=1 SV=2	11	27	11	55.892	8.27	0.894	2.504	0.722	-0.16	1.32	-0.47	78.1	69.8	195.6	56.4	2.924	76.0014	11
Q02818	Nucleobindin-1 OS=Homo sapiens GN=NUCB1 PE=1 SV=4	11	22	11	53.846	5.25	0.492	0.467	0.897	-1.02	-1.1	-0.16	140	68.9	65.4	125.6	2.415	73.6145	11
P06280	Alpha-galactosidase A OS=Homo sapiens GN=GLA PE=1 SV=1	11	25	11	48.735	5.6	0.719	0.538	0.737	-0.48	-0.89	-0.44	133.6	96	71.9	98.4	3.771	72.4229	11
Q9Y646	Carboxypeptidase Q OS=Homo sapiens GN=CPQ PE=1 SV=1	11	30	11	51.855	6.18	1.004	0.747	1.029	0.01	-0.42	0.04	105.8	106.2	79.1	108.9	5.19	82.0016	11
P15848	Arylsulfatase B OS=Homo sapiens GN=ARSB PE=1 SV=1	11	27	11	59.649	8.21	1.133	0.898	0.829	0.18	-0.15	-0.27	103.6	117.4	93.1	85.9	2.29	82.743	11
P19013	Keratin, type II cytoskeletal 4 OS=Homo sapiens GN=KRT4 PE=1 SV=4	14	22	11	57.25	6.61	0.569	0.503	0.924	-0.81	-0.99	-0.11	133.5	76	67.1	123.4	1.848	69.2544	14
Q8N2S1	Latent-transforming growth factor beta-binding protein 4 OS=Homo sapiens GN=LTBP4 PE=1 SV=2	11	18	11	173.32	5.43	1.723	1.422	1.102	0.79	0.51	0.14	76.2	131.4	108.4	84	0.532	56.7131	11
P02748	Complement component C9 OS=Homo sapiens GN=C9 PE=1 SV=2	11	24	11	63.133	5.59	0.886	3.266	0.971	-0.17	1.71	-0.04	65.3	57.9	213.4	63.4	2.047	76.5578	11
P08582	Melanotransferrin OS=Homo sapiens GN=MFI2 PE=1 SV=2	11	18	11	80.163	5.94	0.686	0.581	0.79	-0.54	-0.78	-0.34	130.8	89.8	76	103.4	0.891	48.4361	11
P26927	Hepatocyte growth factor-like protein OS=Homo sapiens GN=MST1 PE=1 SV=2	11	18	11	80.268	7.68	0.927	0.971	0.899	-0.11	-0.04	-0.15	105.3	97.7	102.3	94.7	1.154	57.9709	11
A8K2U0	Alpha-2-macroglobulin-like protein 1 OS=Homo sapiens GN=A2ML1 PE=1 SV=3	11	15	11	161.004	5.73	2.469	0.893	1.031	1.3	-0.16	0.04	74.2	183.1	66.3	76.4	0.499	43.4402	11
Q5KU26	Collectin-12 OS=Homo sapiens GN=COLEC12 PE=1 SV=3	11	30	11	81.465	5.69	1.198	1.423	1.415	0.26	0.51	0.5	79.4	95.2	113	112.4	0.917	89.6962	11
P13987	CD59 glycoprotein OS=Homo sapiens GN=CD59 PE=1 SV=1	10	434	10	14.168	6.48	1.448	0.955	1.018	0.53	-0.07	0.03	90.5	131	86.4	92.1	71967.6	1400.24	10
Q6UXB8	Peptidase inhibitor 16 OS=Homo sapiens GN=PI16 PE=1 SV=1	10	55	10	49.44	5.39	0.858	0.817	1.438	-0.22	-0.29	0.52	97.3	83.4	79.4	139.9	18.953	190.795	10
P41222	Prostaglandin-H2 D-isomerase OS=Homo sapiens GN=PTGDS PE=1 SV=1	10	171	10	21.015	7.8	1.395	1.497	1.65	0.48	0.58	0.72	72.2	100.7	108.1	119.1	283.804	534.226	10
P32119	Peroxiredoxin-2 OS=Homo sapiens GN=PRDX2 PE=1 SV=5	11	55	10	21.878	5.97	0.225	0.242	0.292	-2.15	-2.05	-1.78	227.5	51.1	55	66.4	67.129	176.487	11
P05543	Thyroxine-binding globulin OS=Homo sapiens GN=SERPINA7 PE=1 SV=2	10	43	10	46.295	6.3	1.047	1.159	0.929	0.07	0.21	-0.11	96.8	101.3	112.1	89.8	12.335	134.153	10
Q92820	Gamma-glutamyl hydrolase OS=Homo sapiens GN=GGH PE=1 SV=2	10	57	10	35.941	7.11	0.645	0.492	0.967	-0.63	-1.02	-0.05	128.9	83.1	63.4	124.6	19.691	178.093	10
Q12907	Vesicular integral-membrane protein VIP36 OS=Homo sapiens GN=LMAN2 PE=1 SV=1	10	52	10	40.203	6.95	0.34	0.394	1.013	-1.56	-1.34	0.02	145.6	49.5	57.4	147.5	14.505	167.262	10
O94919	Endonuclease domain-containing 1 protein OS=Homo sapiens GN=ENDOD1 PE=1 SV=2	10	44	10	54.981	5.71	0.457	0.519	0.903	-1.13	-0.95	-0.15	138.9	63.4	72.1	125.5	4.298	128.825	10
Q8WZ75	Roundabout homolog 4 OS=Homo sapiens GN=ROBO4 PE=1 SV=1	10	34	10	107.39	6.64	0.347	0.375	0.551	-1.53	-1.42	-0.86	176	61.1	66	96.9	1.512	124.897	10
P02753	Retinol-binding protein 4 OS=Homo sapiens GN=RBP4 PE=1 SV=3	10	99	10	22.995	6.07	1.309	2.997	0.953	0.39	1.58	-0.07	63.9	83.7	191.5	60.9	315.228	303.831	10
P49747	Cartilage oligomeric matrix protein OS=Homo sapiens GN=COMP PE=1 SV=2	11	31	10	82.808	4.6	1.484	1.051	1.134	0.57	0.07	0.18	85.7	127.2	90	97.2	2.932	87.8515	11
P09603	Macrophage colony-stimulating factor 1 OS=Homo sapiens GN=CSF1 PE=1 SV=2	10	37	10	60.142	5.29	0.52	0.585	0.844	-0.94	-0.77	-0.25	135.7	70.5	79.3	114.5	3.786	121.506	10
P05362	Intercellular adhesion molecule 1 OS=Homo sapiens GN=ICAM1 PE=1 SV=2	10	21	10	57.789	7.99	0.572	0.619	0.888	-0.81	-0.69	-0.17	129.9	74.3	80.4	115.4	2.415	58.3867	10
P05067	Amyloid beta A4 protein OS=Homo sapiens GN=APP PE=1 SV=3	11	30	10	86.888	4.82	1.034	0.874	0.963	0.05	-0.19	-0.06	103.3	106.9	90.3	99.5	1.622	97.0017	11
P50895	Basal cell adhesion molecule OS=Homo sapiens GN=BCAM PE=1 SV=2	10	14	10	67.363	5.81	0.359	0.383	0.78	-1.48	-1.38	-0.36	158.5	57	60.7	123.7	1.198	49.3056	10
Q92859	Neogenin OS=Homo sapiens GN=NEO1 PE=1 SV=2	10	17	10	159.917	6.54	0.807	0.84	0.715	-0.31	-0.25	-0.48	119	96	100	85.1	0.596	56.1355	10
P11717	Cation-independent mannose-6-phosphate receptor OS=Homo sapiens GN=IGF2R PE=1 SV=3	10	13	10	274.199	5.94	1.116	1.285	0.895	0.16	0.36	-0.16	93.1	103.9	119.7	83.3	0.21	40.7447	10
Q14315	Filamin-C OS=Homo sapiens GN=FLNC PE=1 SV=3	10	13	10	290.841	5.97	1.939	1.938	1.087	0.96	0.95	0.12	67.1	130.1	130	72.9	0.163	38.3282	10
P06702	Protein S100-A9 OS=Homo sapiens GN=S100A9 PE=1 SV=1	9	122	9	13.234	6.13	3.45	0.725	0.817	1.79	-0.46	-0.29	66.8	230.3	48.4	54.5	17781.8	389.331	9
P02765	Alpha-2-HS-glycoprotein OS=Homo sapiens GN=AHSG PE=1 SV=1	9	105	9	39.3	5.72	1.533	2.834	1.208	0.62	1.5	0.27	60.8	93.3	172.4	73.5	11.915	319.39	9
P09668	Pro-cathepsin H OS=Homo sapiens GN=CTSH PE=1 SV=4	9	59	9	37.369	8.07	1.09	1.071	1.64	0.12	0.1	0.71	83.3	90.8	89.2	136.6	20.544	170.859	9
P05109	Protein S100-A8 OS=Homo sapiens GN=S100A8 PE=1 SV=1	9	83	9	10.828	7.03	2.954	0.687	0.79	1.56	-0.54	-0.34	73.7	217.5	50.6	58.2	420.697	282.256	9
O00584	Ribonuclease T2 OS=Homo sapiens GN=RNASET2 PE=1 SV=2	9	35	9	29.462	7.08	1.548	1.229	1.363	0.63	0.3	0.45	77.8	120.4	95.7	106.1	9	105.083	9
P04004	Vitronectin OS=Homo sapiens GN=VTN PE=1 SV=1	9	62	9	54.271	5.8	0.937	2.07	0.938	-0.09	1.05	-0.09	80.9	75.8	167.5	75.9	4.484	194.212	9
P05155	Plasma protease C1 inhibitor OS=Homo sapiens GN=SERPING1 PE=1 SV=2	9	29	9	55.119	6.55	0.514	0.52	0.734	-0.96	-0.94	-0.45	144.5	74.2	75.1	106.1	5.19	85.8982	9
P02792	Ferritin light chain OS=Homo sapiens GN=FTL PE=1 SV=2	9	39	9	20.007	5.78	1.234	2.03	2.2	0.3	1.02	1.14	61.9	76.3	125.6	136.2	25.102	134.183	9
P02750	Leucine-rich alpha-2-glycoprotein OS=Homo sapiens GN=LRG1 PE=1 SV=2	9	32	9	38.154	6.95	0.6	0.603	1.267	-0.74	-0.73	0.34	115.3	69.2	69.6	146	3.217	111.408	9
P13591	Neural cell adhesion molecule 1 OS=Homo sapiens GN=NCAM1 PE=1 SV=3	9	31	9	94.515	4.87	1.06	1.128	0.84	0.08	0.17	-0.25	99.3	105.3	112	83.5	1.537	97.8942	9
P02794	Ferritin heavy chain OS=Homo sapiens GN=FTH1 PE=1 SV=2	9	22	9	21.212	5.55	1.127	1.532	1.502	0.17	0.62	0.59	77.5	87.4	118.7	116.4	20.544	69.2012	9
Q9BYE9	Cadherin-related family member 2 OS=Homo sapiens GN=CDHR2 PE=1 SV=2	9	28	9	141.455	4.5	0.719	0.712	0.918	-0.48	-0.49	-0.12	119.4	85.8	85.1	109.7	0.909	97.4217	9
P51688	N-sulphoglucosamine sulphohydrolase OS=Homo sapiens GN=SGSH PE=1 SV=1	9	31	9	56.659	6.95	0.633	0.523	0.986	-0.66	-0.93	-0.02	127.3	80.6	66.6	125.5	3.507	93.2373	9
P05937	Calbindin OS=Homo sapiens GN=CALB1 PE=1 SV=2	9	20	9	30.006	4.83	0.62	0.469	1.051	-0.69	-1.09	0.07	127.4	78.9	59.7	133.9	10.548	62.0357	9
Q9Y5Y7	Lymphatic vessel endothelial hyaluronic acid receptor 1 OS=Homo sapiens GN=LYVE1 PE=1 SV=2	9	44	9	35.191	8.28	1.123	1.198	1.329	0.17	0.26	0.41	86	96.6	103	114.3	7.799	133.53	9
P43121	Cell surface glycoprotein MUC18 OS=Homo sapiens GN=MCAM PE=1 SV=2	9	24	9	71.563	5.76	0.41	0.443	0.65	-1.29	-1.17	-0.62	159.8	65.5	70.8	103.8	1.39	79.4674	9
Q7Z3B1	Neuronal growth regulator 1 OS=Homo sapiens GN=NEGR1 PE=1 SV=3	9	31	9	38.694	6.21	0.307	0.372	1.097	-1.7	-1.42	0.13	144.1	44.2	53.7	158	7.66	103.233	9
Q13510	Acid ceramidase OS=Homo sapiens GN=ASAH1 PE=1 SV=5	9	30	9	44.631	7.62	0.924	0.954	1.408	-0.11	-0.07	0.49	93.3	86.3	89.1	131.4	4.484	84.359	9
P19827	Inter-alpha-trypsin inhibitor heavy chain H1 OS=Homo sapiens GN=ITIH1 PE=1 SV=3	9	18	9	101.326	6.79	1.317	1.599	0.917	0.4	0.68	-0.12	82.8	109	132.4	75.9	1.031	59.7947	9
Q8IUL8	Cartilage intermediate layer protein 2 OS=Homo sapiens GN=CILP2 PE=2 SV=2	9	15	9	126.211	8.22	0.287	0.256	0.535	-1.8	-1.96	-0.9	192.5	55.2	49.3	103	0.618	56.6457	9
P80188	Neutrophil gelatinase-associated lipocalin OS=Homo sapiens GN=LCN2 PE=1 SV=2	9	40	9	22.574	8.91	1.841	1.442	1.042	0.88	0.53	0.06	75.1	138.3	108.3	78.3	37.312	103.506	9
P16870	Carboxypeptidase E OS=Homo sapiens GN=CPE PE=1 SV=1	9	19	9	53.117	5.14	0.643	0.443	1.474	-0.64	-1.17	0.56	112.3	72.3	49.8	165.6	2.282	53.5709	9
Q8NHP8	Putative phospholipase B-like 2 OS=Homo sapiens GN=PLBD2 PE=1 SV=2	9	25	9	65.43	6.8	0.935	0.837	1.079	-0.1	-0.26	0.11	103.9	97.1	86.9	112.1	1.829	66.3969	9
P14543	Nidogen-1 OS=Homo sapiens GN=NID1 PE=1 SV=3	9	15	9	136.291	5.29	0.504	0.521	0.691	-0.99	-0.94	-0.53	147.3	74.2	76.7	101.8	0.585	47.8013	9
P08236	Beta-glucuronidase OS=Homo sapiens GN=GUSB PE=1 SV=2	9	30	9	74.685	7.02	0.645	0.49	0.94	-0.63	-1.03	-0.09	130.1	83.9	63.7	122.3	1.254	85.0483	9
P07996	Thrombospondin-1 OS=Homo sapiens GN=THBS1 PE=1 SV=2	9	18	9	129.3	4.94	2.273	1.302	0.986	1.18	0.38	-0.02	71.9	163.5	93.6	70.9	0.468	49.2574	9
P60174	Triosephosphate isomerase OS=Homo sapiens GN=TPI1 PE=1 SV=3	9	11	9	30.772	5.92	0.496	0.618	1.079	-1.01	-0.7	0.11	125.3	62.1	77.4	135.2	2.36	38.8641	9
P05556	Integrin beta-1 OS=Homo sapiens GN=ITGB1 PE=1 SV=2	9	11	9	88.357	5.39	1.425	0.896	1.209	0.51	-0.16	0.27	88.3	125.8	79.1	106.7	0.679	37.6606	9
O00533	Neural cell adhesion molecule L1-like protein OS=Homo sapiens GN=CHL1 PE=1 SV=4	9	10	9	134.987	5.76	0.389	0.536	0.686	-1.36	-0.9	-0.54	153.2	59.6	82.1	105	0.421	27.883	9
P06733	Alpha-enolase OS=Homo sapiens GN=ENO1 PE=1 SV=2	9	17	9	47.139	7.39	0.444	0.484	1.031	-1.17	-1.05	0.04	135.2	60	65.5	139.3	1.212	41.0537	9
P98172	Ephrin-B1 OS=Homo sapiens GN=EFNB1 PE=1 SV=1	8	45	8	37.982	8.94	1.027	1.236	1.009	0.04	0.31	0.01	93.6	96.2	115.7	94.5	11.328	127.001	8
P08294	Extracellular superoxide dismutase [Cu-Zn] OS=Homo sapiens GN=SOD3 PE=1 SV=2	8	31	8	25.835	6.61	0.629	0.539	0.748	-0.67	-0.89	-0.42	137.1	86.3	74	102.6	42.288	91.4452	8
P15328	Folate receptor alpha OS=Homo sapiens GN=FOLR1 PE=1 SV=3	8	51	8	29.799	7.97	1.107	0.88	0.917	0.15	-0.18	-0.13	102.5	113.4	90.2	94	26.384	123.727	8
O00241	Signal-regulatory protein beta-1 OS=Homo sapiens GN=SIRPB1 PE=1 SV=5	11	36	8	43.184	6.52	0.91	1.006	0.991	-0.14	0.01	-0.01	102.4	93.2	103	101.4	3.786	126.993	11
Q9UBG3	Cornulin OS=Homo sapiens GN=CRNN PE=1 SV=1	8	27	8	53.502	6.1	0.416	0.619	0.742	-1.27	-0.69	-0.43	144.1	59.9	89.1	106.9	2.162	79.7946	8
O95497	Pantetheinase OS=Homo sapiens GN=VNN1 PE=1 SV=2	8	24	8	56.975	5.55	0.813	0.933	1.459	-0.3	-0.1	0.54	95.2	77.3	88.7	138.8	2.03	65.8764	8
Q01973	Tyrosine-protein kinase transmembrane receptor ROR1 OS=Homo sapiens GN=ROR1 PE=1 SV=2	9	22	8	104.215	7.17	0.759	0.612	0.966	-0.4	-0.71	-0.05	119.9	91	73.4	115.8	1.268	62.3279	9
O43866	CD5 antigen-like OS=Homo sapiens GN=CD5L PE=1 SV=1	8	21	8	38.063	5.47	1.494	1.66	0.763	0.58	0.73	-0.39	81.3	121.5	135.1	62.1	3.062	62.9706	8
P05154	Plasma serine protease inhibitor OS=Homo sapiens GN=SERPINA5 PE=1 SV=3	8	21	8	45.646	9.26	0.931	0.639	0.832	-0.1	-0.65	-0.26	117.6	109.5	75.1	97.9	3.217	60.6771	8
P35443	Thrombospondin-4 OS=Homo sapiens GN=THBS4 PE=1 SV=2	9	15	8	105.802	4.68	1.27	0.886	1.431	0.34	-0.17	0.52	87.2	110.7	77.3	124.8	1.006	50.5143	9
P30086	Phosphatidylethanolamine-binding protein 1 OS=Homo sapiens GN=PEBP1 PE=1 SV=3	8	23	8	21.044	7.53	0.333	0.447	0.609	-1.59	-1.16	-0.71	167.4	55.8	74.8	102	9	69.8602	8
P03973	Antileukoproteinase OS=Homo sapiens GN=SLPI PE=1 SV=2	8	23	8	14.316	8.75	3.506	0.736	1.037	1.81	-0.44	0.05	63.7	223.3	46.9	66	34.938	56.8822	8
P13671	Complement component C6 OS=Homo sapiens GN=C6 PE=1 SV=3	8	18	8	104.718	6.76	1.302	2.151	0.834	0.38	1.11	-0.26	75.7	98.5	162.8	63.1	0.707	53.5189	8
P04196	Histidine-rich glycoprotein OS=Homo sapiens GN=HRG PE=1 SV=1	8	10	8	59.541	7.5	0.86	2.288	1.058	-0.22	1.19	0.08	76.8	66.1	175.8	81.3	1.512	36.5151	8
P14314	Glucosidase 2 subunit beta OS=Homo sapiens GN=PRKCSH PE=1 SV=2	8	11	8	59.388	4.41	0.459	0.421	0.618	-1.12	-1.25	-0.69	160.2	73.5	67.4	99	1.565	39.5429	8
P54760	Ephrin type-B receptor 4 OS=Homo sapiens GN=EPHB4 PE=1 SV=2	8	13	8	108.201	6.9	0.78	1.189	0.83	-0.36	0.25	-0.27	105.3	82.1	125.2	87.4	0.438	40.9011	8
Q7Z7G0	Target of Nesh-SH3 OS=Homo sapiens GN=ABI3BP PE=1 SV=1	8	12	8	118.569	9.44	0.498	0.421	0.963	-1	-1.25	-0.05	138.7	69.1	58.5	133.6	0.515	37.7251	8
P06865	Beta-hexosaminidase subunit alpha OS=Homo sapiens GN=HEXA PE=1 SV=2	9	14	8	60.664	5.16	1.029	0.883	1.361	0.04	-0.18	0.44	93.6	96.3	82.7	127.4	1.555	42.6815	9
P11021	78 kDa glucose-regulated protein OS=Homo sapiens GN=HSPA5 PE=1 SV=2	9	13	8	72.288	5.16	0.492	0.59	0.567	-1.02	-0.76	-0.82	151	74.3	89.1	85.6	0.753	37.8546	9
Q86VB7	Scavenger receptor cysteine-rich type 1 protein M130 OS=Homo sapiens GN=CD163 PE=1 SV=2	8	11	8	125.369	5.95	1.043	1.116	0.704	0.06	0.16	-0.51	103.6	108	115.5	72.9	0.515	29.9804	8
P49913	Cathelicidin antimicrobial peptide OS=Homo sapiens GN=CAMP PE=1 SV=1	8	13	8	19.289	9.41	2.014	1.37	1.412	1.01	0.45	0.5	69	139	94.6	97.4	9	38.6489	8
Q9UBC9	Small proline-rich protein 3 OS=Homo sapiens GN=SPRR3 PE=1 SV=2	8	24	8	18.142	8.57	0.68	0.674	1.707	-0.56	-0.57	0.77	98.5	67	66.4	168.1	3.642	58.1333	8
Q6UX71	Plexin domain-containing protein 2 OS=Homo sapiens GN=PLXDC2 PE=1 SV=1	8	10	8	59.546	6.46	0.63	0.919	0.812	-0.67	-0.12	-0.3	119	75	109.4	96.6	0.995	31.7626	8
P69905	Hemoglobin subunit alpha OS=Homo sapiens GN=HBA1 PE=1 SV=2	7	59	7	15.248	8.68	0.252	0.339	0.273	-1.99	-1.56	-1.87	214.5	54.1	72.8	58.6	7497.94	231.549	7
P02763	Alpha-1-acid glycoprotein 1 OS=Homo sapiens GN=ORM1 PE=1 SV=1	9	123	7	23.497	5.02	0.992	0.966	2.137	-0.01	-0.05	1.1	78.5	77.9	75.8	167.8	50.795	408.045	9
P14151	L-selectin OS=Homo sapiens GN=SELL PE=1 SV=2	7	36	7	42.159	6.6	1.118	1.152	1.258	0.16	0.2	0.33	88.3	98.8	101.7	111.2	16.783	132.365	7
Q15828	Cystatin-M OS=Homo sapiens GN=CST6 PE=1 SV=1	7	64	7	16.5	8.09	1.219	2.962	1	0.29	1.57	0	64.7	78.9	191.7	64.7	64.793	164.117	7
P06870	Kallikrein-1 OS=Homo sapiens GN=KLK1 PE=1 SV=2	7	69	7	28.871	4.83	0.874	0.457	0.919	-0.19	-1.13	-0.12	123.1	107.6	56.2	113.1	37.312	231.975	7
P00441	Superoxide dismutase [Cu-Zn] OS=Homo sapiens GN=SOD1 PE=1 SV=2	7	35	7	15.926	6.13	1.593	0.957	1.056	0.67	-0.06	0.08	86.8	138.3	83.1	91.7	25.102	121.925	7
P07858	Cathepsin B OS=Homo sapiens GN=CTSB PE=1 SV=3	7	53	7	37.797	6.3	1.442	1.001	0.956	0.53	0	-0.07	90.9	131.1	91	86.9	10.365	158.935	7
P05090	Apolipoprotein D OS=Homo sapiens GN=APOD PE=1 SV=1	7	44	7	21.262	5.15	1.294	1.194	1.375	0.37	0.26	0.46	82.2	106.4	98.2	113.1	99	124.608	7
P20933	N(4)-(beta-N-acetylglucosaminyl)-L-asparaginase OS=Homo sapiens GN=AGA PE=1 SV=2	7	26	7	37.184	6.28	1.42	0.953	1.354	0.51	-0.07	0.44	84.6	120.2	80.6	114.6	4.623	96.6607	7
P61916	Epididymal secretory protein E1 OS=Homo sapiens GN=NPC2 PE=1 SV=1	7	53	7	16.559	7.65	1.851	1.183	1.826	0.89	0.24	0.87	68.3	126.3	80.8	124.6	30.623	171.624	7
O00391	Sulfhydryl oxidase 1 OS=Homo sapiens GN=QSOX1 PE=1 SV=3	7	28	7	82.526	8.92	0.813	0.674	0.818	-0.3	-0.57	-0.29	121	98.3	81.6	99	1.059	91.9982	7
P10619	Lysosomal protective protein OS=Homo sapiens GN=CTSA PE=1 SV=2	7	28	7	54.431	6.61	1.246	1.331	1.104	0.32	0.41	0.14	85.5	106.5	113.7	94.3	3.329	89.533	7
Q5JS37	NHL repeat-containing protein 3 OS=Homo sapiens GN=NHLRC3 PE=2 SV=1	7	28	7	38.258	6.43	1.111	0.797	1.551	0.15	-0.33	0.63	89.7	99.6	71.5	139.1	4.012	94.2456	7
P15289	Arylsulfatase A OS=Homo sapiens GN=ARSA PE=1 SV=3	7	37	7	53.554	6.07	0.613	0.528	1.279	-0.71	-0.92	0.35	117	71.7	61.7	149.6	4.995	122.268	7
Q92954	Proteoglycan 4 OS=Homo sapiens GN=PRG4 PE=1 SV=2	7	25	7	150.984	9.5	2.678	3.44	1.74	1.42	1.78	0.8	45.2	120.9	155.3	78.6	0.308	71.3715	7
P17900	Ganglioside GM2 activator OS=Homo sapiens GN=GM2A PE=1 SV=4	7	47	7	20.825	5.31	1.401	1.895	1.776	0.49	0.92	0.83	65.9	92.3	124.8	117	16.783	134.925	7
Q96NY8	Poliovirus receptor-related protein 4 OS=Homo sapiens GN=PVRL4 PE=1 SV=1	7	16	7	55.42	5.38	0.385	0.354	0.518	-1.38	-1.5	-0.95	177.3	68.2	62.7	91.8	1.154	62.1489	7
Q6EMK4	Vasorin OS=Homo sapiens GN=VASN PE=1 SV=1	7	19	7	71.668	7.39	0.827	0.767	0.785	-0.27	-0.38	-0.35	118.4	97.9	90.8	92.9	1.471	74.1897	7
P98095	Fibulin-2 OS=Homo sapiens GN=FBLN2 PE=1 SV=2	7	36	7	126.489	4.82	1.608	1.401	1.105	0.69	0.49	0.14	78.2	125.8	109.6	86.4	0.741	112.026	7
Q13421	Mesothelin OS=Homo sapiens GN=MSLN PE=1 SV=2	7	18	7	68.942	6.38	0.381	0.347	1.016	-1.39	-1.53	0.02	145.8	55.6	50.5	148.1	1.477	55.1349	7
P29508	Serpin B3 OS=Homo sapiens GN=SERPINB3 PE=1 SV=2	7	14	7	44.537	6.81	1.308	0.853	1.109	0.39	-0.23	0.15	93.7	122.5	79.9	103.9	2.162	44.9985	7
P08571	Monocyte differentiation antigen CD14 OS=Homo sapiens GN=CD14 PE=1 SV=2	7	19	7	40.051	6.23	0.385	0.447	0.709	-1.38	-1.16	-0.5	157.4	60.6	70.4	111.6	2.981	64.103	7
P39059	Collagen alpha-1(XV) chain OS=Homo sapiens GN=COL15A1 PE=1 SV=2	7	20	7	141.632	5	0.537	0.78	0.474	-0.9	-0.36	-1.08	143.3	77	111.8	68	0.668	55.9862	7
Q04721	Neurogenic locus notch homolog protein 2 OS=Homo sapiens GN=NOTCH2 PE=1 SV=3	7	12	7	265.226	5.14	1.958	1.31	1.063	0.97	0.39	0.09	75	146.9	98.3	79.8	0.268	35.3918	7
P48740	Mannan-binding lectin serine protease 1 OS=Homo sapiens GN=MASP1 PE=1 SV=3	7	14	7	79.195	5.49	1.503	1.895	1.161	0.59	0.92	0.22	72	108.1	136.4	83.5	1.31	36.2517	7
O60279	Sushi domain-containing protein 5 OS=Homo sapiens GN=SUSD5 PE=1 SV=3	7	15	7	67.978	4.91	1.332	1.441	1.054	0.41	0.53	0.08	82.9	110.4	119.4	87.4	1.326	47.4473	7
P48745	Protein NOV homolog OS=Homo sapiens GN=NOV PE=1 SV=1	7	23	7	39.135	7.72	1.423	1.051	0.989	0.51	0.07	-0.02	89.6	127.5	94.2	88.6	1.565	82.1517	7
P51884	Lumican OS=Homo sapiens GN=LUM PE=1 SV=2	7	15	7	38.405	6.61	0.511	0.613	0.71	-0.97	-0.71	-0.49	141.1	72.1	86.5	100.3	3.217	43.7849	7
Q8WZ42	Titin OS=Homo sapiens GN=TTN PE=1 SV=4	7	15	7	3813.65	6.35	1.206	1.438	1.103	0.27	0.52	0.14	84.3	101.7	121.2	92.9	0.011	43.6738	7
Q9Y624	Junctional adhesion molecule A OS=Homo sapiens GN=F11R PE=1 SV=1	7	11	7	32.562	7.9	0.664	0.658	0.771	-0.59	-0.6	-0.38	129.3	85.9	85.1	99.7	2.162	35.7802	7
Q86TH1	ADAMTS-like protein 2 OS=Homo sapiens GN=ADAMTSL2 PE=1 SV=1	7	17	7	104.553	6.42	0.954	0.629	0.878	-0.07	-0.67	-0.19	115.6	110.3	72.7	101.4	0.677	47.3825	7
P29279	Connective tissue growth factor OS=Homo sapiens GN=CTGF PE=1 SV=2	7	18	7	38.065	8	1.495	1.52	1.012	0.58	0.6	0.02	79.6	119	120.9	80.5	1.276	56.0984	7
Q07954	Prolow-density lipoprotein receptor-related protein 1 OS=Homo sapiens GN=LRP1 PE=1 SV=2	7	9	7	504.276	5.39	1.412	1.032	1.029	0.5	0.05	0.04	89.4	126.3	92.3	92	0.084	29.5272	7
Q9BRK3	Matrix-remodeling-associated protein 8 OS=Homo sapiens GN=MXRA8 PE=1 SV=1	7	13	7	49.101	7.23	0.335	0.395	0.513	-1.58	-1.34	-0.96	178.3	59.7	70.4	91.5	0.778	45.8612	7
P54764	Ephrin type-A receptor 4 OS=Homo sapiens GN=EPHA4 PE=1 SV=1	7	10	7	109.79	6.61	0.805	1.269	1.024	-0.31	0.34	0.03	97.6	78.5	123.8	100	0.448	33.5252	7
P16284	Platelet endothelial cell adhesion molecule OS=Homo sapiens GN=PECAM1 PE=1 SV=1	7	13	7	82.484	6.99	0.802	0.613	0.957	-0.32	-0.71	-0.06	118.7	95.1	72.7	113.5	0.585	41.9547	7
P16112	Aggrecan core protein OS=Homo sapiens GN=ACAN PE=1 SV=2	7	10	7	250.04	4.18	0.757	0.643	0.727	-0.4	-0.64	-0.46	127.9	96.8	82.3	93	0.421	35.8314	7
P15144	Aminopeptidase N OS=Homo sapiens GN=ANPEP PE=1 SV=4	7	9	7	109.471	5.48	0.891	1.036	0.912	-0.17	0.05	-0.13	104.2	92.8	107.9	95.1	0.416	29.1452	7
P00533	Epidermal growth factor receptor OS=Homo sapiens GN=EGFR PE=1 SV=2	7	8	7	134.19	6.68	0.958	1.131	1.005	-0.06	0.18	0.01	97.7	93.6	110.5	98.2	0.255	28.1201	7
P02545	Prelamin-A/C OS=Homo sapiens GN=LMNA PE=1 SV=1	7	9	7	74.095	7.02	0.589	0.691	0.846	-0.76	-0.53	-0.24	128	75.4	88.4	108.3	0.506	27.9875	7
P13611	Versican core protein OS=Homo sapiens GN=VCAN PE=1 SV=3	7	11	7	372.59	4.51	0.447	0.534	0.661	-1.16	-0.91	-0.6	151.4	67.7	80.8	100	0.132	33.5307	7
P78310	Coxsackievirus and adenovirus receptor OS=Homo sapiens GN=CXADR PE=1 SV=1	7	11	7	40.004	7.56	1.804	2.239	1.561	0.85	1.16	0.64	60.6	109.3	135.6	94.6	1.089	32.4832	7
P20810	Calpastatin OS=Homo sapiens GN=CAST PE=1 SV=4	7	11	7	76.526	5.07	0.561	0.584	0.487	-0.83	-0.78	-1.04	152	85.3	88.8	73.9	0.585	20.1899	7
P27797	Calreticulin OS=Homo sapiens GN=CALR PE=1 SV=1	7	9	7	48.112	4.44	0.539	0.795	0.893	-0.89	-0.33	-0.16	124	66.8	98.5	110.7	1.031	20.8978	7
P14780	Matrix metalloproteinase-9 OS=Homo sapiens GN=MMP9 PE=1 SV=3	7	10	7	78.408	6.06	2.173	0.742	0.643	1.12	-0.43	-0.64	87.8	190.7	65.1	56.4	0.512	30.9995	7
P08572	Collagen alpha-2(IV) chain OS=Homo sapiens GN=COL4A2 PE=1 SV=4	7	10	7	167.449	8.66	0.521	0.555	0.769	-0.94	-0.85	-0.38	140.6	73.2	78.1	108.1	0.205	29.2725	7
P78504	Protein jagged-1 OS=Homo sapiens GN=JAG1 PE=1 SV=3	7	8	7	133.709	6.06	1.048	0.714	0.679	0.07	-0.49	-0.56	116.2	121.9	83	78.9	0.328	19.5671	7
Q8IZF2	Probable G-protein coupled receptor 116 OS=Homo sapiens GN=GPR116 PE=1 SV=3	7	8	7	149.361	6.65	0.882	0.716	0.918	-0.18	-0.48	-0.12	113.8	100.4	81.5	104.4	0.302	22.1879	7
P07998	Ribonuclease pancreatic OS=Homo sapiens GN=RNASE1 PE=1 SV=4	6	352	6	17.633	8.79	1.525	1.218	0.967	0.61	0.29	-0.05	84.9	129.5	103.5	82.1	359380	1085.18	6
P10153	Non-secretory ribonuclease OS=Homo sapiens GN=RNASE2 PE=1 SV=2	6	205	6	18.342	8.73	1.55	0.81	0.92	0.63	-0.3	-0.12	93.5	144.9	75.7	86	562340	703.049	6
P07288	Prostate-specific antigen OS=Homo sapiens GN=KLK3 PE=1 SV=2	6	42	6	28.723	7.68	0.64	0.613	1.559	-0.64	-0.71	0.64	104.9	67.2	64.3	163.6	33.551	158.585	6
P19652	Alpha-1-acid glycoprotein 2 OS=Homo sapiens GN=ORM2 PE=1 SV=2	8	95	6	23.588	5.11	1.404	1.028	2.672	0.49	0.04	1.42	65.5	92	67.4	175.1	30.623	245.423	8
Q96S96	Phosphatidylethanolamine-binding protein 4 OS=Homo sapiens GN=PEBP4 PE=1 SV=3	6	41	6	25.717	6.54	1.535	1.585	1.091	0.62	0.66	0.13	76.8	117.8	121.7	83.7	49.119	87.0082	6
Q7Z5L0	Vitelline membrane outer layer protein 1 homolog OS=Homo sapiens GN=VMO1 PE=1 SV=1	6	67	6	21.52	5.07	0.269	0.31	0.542	-1.9	-1.69	-0.88	188.6	50.7	58.5	102.2	18.953	185.336	6
P78380	Oxidized low-density lipoprotein receptor 1 OS=Homo sapiens GN=OLR1 PE=1 SV=1	6	20	6	30.939	7.28	0.706	0.646	0.731	-0.5	-0.63	-0.45	129.7	91.6	83.8	94.8	16.783	73.5828	6
Q9BY67	Cell adhesion molecule 1 OS=Homo sapiens GN=CADM1 PE=1 SV=2	6	34	6	48.478	5.07	0.362	0.276	0.602	-1.47	-1.86	-0.73	178.6	64.6	49.3	107.4	3.217	98.6538	6
Q9NQ36	Signal peptide, CUB and EGF-like domain-containing protein 2 OS=Homo sapiens GN=SCUBE2 PE=2 SV=2	6	23	6	109.893	6.65	1.277	1.353	1.496	0.35	0.44	0.58	78	99.6	105.6	116.7	0.919	76.8037	6
P16070	CD44 antigen OS=Homo sapiens GN=CD44 PE=1 SV=3	6	79	6	81.487	5.33	0.662	0.43	0.579	-0.59	-1.22	-0.79	149.7	99.2	64.4	86.7	1.581	242.224	6
P07711	Cathepsin L1 OS=Homo sapiens GN=CTSL1 PE=1 SV=2	7	31	6	37.54	5.45	0.95	0.983	1.027	-0.07	-0.02	0.04	101	95.9	99.3	103.8	16.013	94.4919	7
P61626	Lysozyme C OS=Homo sapiens GN=LYZ PE=1 SV=1	6	34	6	16.526	9.16	2.53	0.949	0.48	1.34	-0.08	-1.06	80.7	204.1	76.5	38.7	17.738	110.334	6
P62158	Calmodulin OS=Homo sapiens GN=CALM1 PE=1 SV=2	6	30	6	16.827	4.22	0.487	0.409	1.006	-1.04	-1.29	0.01	137.8	67.1	56.4	138.7	18.953	99.3936	6
Q8TDQ0	Hepatitis A virus cellular receptor 2 OS=Homo sapiens GN=HAVCR2 PE=1 SV=3	6	50	6	33.373	5.72	0.469	0.421	0.813	-1.09	-1.25	-0.3	148	69.5	62.3	120.2	5.952	136.253	6
P36980	Complement factor H-related protein 2 OS=Homo sapiens GN=CFHR2 PE=1 SV=1	9	28	6	30.631	6.38	1.257	2.835	0.873	0.33	1.5	-0.2	67.1	84.3	190.1	58.5	4.08	87.2938	9
Q9H665	IGF-like family receptor 1 OS=Homo sapiens GN=IGFLR1 PE=1 SV=1	6	19	6	37.87	7.08	3.076	1.571	1.224	1.62	0.65	0.29	58.2	179.1	91.4	71.3	3.084	61.643	6
P53634	Dipeptidyl peptidase 1 OS=Homo sapiens GN=CTSC PE=1 SV=2	6	23	6	51.82	6.99	1.438	1.639	0.963	0.52	0.71	-0.05	79.4	114.1	130.1	76.4	2.311	74.1194	6
Q9UBR2	Cathepsin Z OS=Homo sapiens GN=CTSZ PE=1 SV=1	6	23	6	33.846	7.11	1.742	1.214	1.666	0.8	0.28	0.74	71.2	123.9	86.4	118.5	4.623	73.1293	6
P10599	Thioredoxin OS=Homo sapiens GN=TXN PE=1 SV=3	6	26	6	11.73	4.92	0.919	0.618	0.744	-0.12	-0.7	-0.43	122	112	75.3	90.7	70.969	81.4731	6
P54826	Growth arrest-specific protein 1 OS=Homo sapiens GN=GAS1 PE=1 SV=2	6	14	6	35.67	5.55	1.055	0.756	0.927	0.08	-0.4	-0.11	107	112.9	80.9	99.2	2.594	51.7505	6
Q06033	Inter-alpha-trypsin inhibitor heavy chain H3 OS=Homo sapiens GN=ITIH3 PE=1 SV=2	6	13	6	99.787	5.74	1.389	2.791	1.026	0.47	1.48	0.04	64.5	89.5	179.9	66.1	0.778	41.0103	6
P31151	Protein S100-A7 OS=Homo sapiens GN=S100A7 PE=1 SV=4	6	17	6	11.464	6.77	0.596	0.459	0.995	-0.75	-1.12	-0.01	131.1	78.1	60.2	130.5	18.307	58.6444	6
P31025	Lipocalin-1 OS=Homo sapiens GN=LCN1 PE=1 SV=1	6	14	6	19.238	5.58	1.305	1.295	1.437	0.38	0.37	0.52	79.4	103.6	102.8	114.1	5.579	55.1795	6
P19438	Tumor necrosis factor receptor superfamily member 1A OS=Homo sapiens GN=TNFRSF1A PE=1 SV=1	6	23	6	50.462	6.64	2.493	1.953	0.838	1.32	0.97	-0.25	63.6	158.7	124.3	53.4	1.565	78.2067	6
Q96RW7	Hemicentin-1 OS=Homo sapiens GN=HMCN1 PE=1 SV=2	6	18	6	613.001	6.49	0.975	0.963	0.803	-0.04	-0.06	-0.32	106.9	104.3	102.9	85.8	0.076	46.9547	6
P46531	Neurogenic locus notch homolog protein 1 OS=Homo sapiens GN=NOTCH1 PE=1 SV=4	6	11	6	272.323	5.12	1.711	1.282	0.786	0.78	0.36	-0.35	83.7	143.2	107.3	65.8	0.285	29.8183	6
P05160	Coagulation factor XIII B chain OS=Homo sapiens GN=F13B PE=1 SV=3	6	14	6	75.461	6.39	1.082	1.639	0.873	0.11	0.71	-0.2	87.1	94.2	142.7	76	1.031	32.21	6
P07686	Beta-hexosaminidase subunit beta OS=Homo sapiens GN=HEXB PE=1 SV=3	7	14	6	63.071	6.76	0.982	0.946	1.151	-0.03	-0.08	0.2	98.1	96.3	92.8	112.9	1.154	45.5206	7
P39060	Collagen alpha-1(XVIII) chain OS=Homo sapiens GN=COL18A1 PE=1 SV=5	6	9	6	178.077	6.01	0.698	0.849	0.624	-0.52	-0.24	-0.68	126.1	88	107.1	78.7	0.27	31.5806	6
P07148	Fatty acid-binding protein, liver OS=Homo sapiens GN=FABP1 PE=1 SV=1	6	12	6	14.199	7.18	0.581	0.592	1.111	-0.78	-0.76	0.15	121.8	70.8	72.1	135.3	9	31.7465	6
Q01469	Fatty acid-binding protein, epidermal OS=Homo sapiens GN=FABP5 PE=1 SV=3	6	14	6	15.155	7.01	0.421	0.591	1.144	-1.25	-0.76	0.19	126.7	53.4	75	144.9	6.943	30.7959	6
P15941	Mucin-1 OS=Homo sapiens GN=MUC1 PE=1 SV=3	6	14	6	122.029	7.47	0.912	0.795	0.639	-0.13	-0.33	-0.65	119.6	109	95.1	76.3	3.394	45.4542	6
P02647	Apolipoprotein A-I OS=Homo sapiens GN=APOA1 PE=1 SV=1	6	11	6	30.759	5.76	1.467	1.099	0.821	0.55	0.14	-0.29	91.2	133.8	100.2	74.8	1.683	29.8189	6
Q14210	Lymphocyte antigen 6D OS=Homo sapiens GN=LY6D PE=1 SV=1	6	16	6	13.278	8.21	2.685	1.983	0.816	1.43	0.99	-0.29	61.7	165.7	122.3	50.3	12.895	35.707	6
Q05707	Collagen alpha-1(XIV) chain OS=Homo sapiens GN=COL14A1 PE=1 SV=3	6	10	6	193.394	5.3	0.956	0.708	0.795	-0.06	-0.5	-0.33	115.6	110.6	81.9	91.9	0.227	31.2085	6
Q13740	CD166 antigen OS=Homo sapiens GN=ALCAM PE=1 SV=2	6	10	6	65.061	6.25	0.622	0.769	1.082	-0.68	-0.38	0.11	115.2	71.7	88.6	124.6	0.911	29.6395	6
Q86T13	C-type lectin domain family 14 member A OS=Homo sapiens GN=CLEC14A PE=1 SV=1	6	11	6	51.603	6.35	0.515	0.603	0.636	-0.96	-0.73	-0.65	145.2	74.8	87.6	92.4	0.978	39.0476	6
P02649	Apolipoprotein E OS=Homo sapiens GN=APOE PE=1 SV=1	6	10	6	36.132	5.73	0.992	1.753	0.71	-0.01	0.81	-0.49	89.8	89.1	157.4	63.8	1.089	34.8517	6
Q13508	Ecto-ADP-ribosyltransferase 3 OS=Homo sapiens GN=ART3 PE=1 SV=2	6	13	6	43.895	6.06	2.28	1.724	1.011	1.19	0.79	0.02	66.5	151.6	114.6	67.2	1.371	38.0461	6
P27930	Interleukin-1 receptor type 2 OS=Homo sapiens GN=IL1R2 PE=1 SV=1	6	9	6	45.392	7.9	0.664	0.768	0.994	-0.59	-0.38	-0.01	116.7	77.5	89.7	116.1	1.31	27.1642	6
P35052	Glypican-1 OS=Homo sapiens GN=GPC1 PE=1 SV=2	6	9	6	61.641	7.3	0.884	0.715	1.045	-0.18	-0.48	0.06	109.8	97	78.5	114.7	0.719	31.532	6
P08123	Collagen alpha-2(I) chain OS=Homo sapiens GN=COL1A2 PE=1 SV=7	6	7	6	129.235	8.95	0.545	0.498	0.581	-0.88	-1.01	-0.78	152.5	83	75.9	88.5	0.214	26.2939	6
P19440	Gamma-glutamyltranspeptidase 1 OS=Homo sapiens GN=GGT1 PE=1 SV=2	6	12	6	61.372	7.12	0.549	0.577	0.972	-0.87	-0.79	-0.04	129.1	70.9	74.5	125.5	0.812	36.4546	6
Q9HBR0	Putative sodium-coupled neutral amino acid transporter 10 OS=Homo sapiens GN=SLC38A10 PE=1 SV=2	6	9	6	119.687	5.73	0.64	0.654	0.684	-0.64	-0.61	-0.55	134.3	86	87.9	91.9	0.34	27.1669	6
Q06830	Peroxiredoxin-1 OS=Homo sapiens GN=PRDX1 PE=1 SV=1	7	13	6	22.096	8.13	0.668	0.679	0.83	-0.58	-0.56	-0.27	125.9	84.1	85.5	104.5	3.394	39.9644	7
P00918	Carbonic anhydrase 2 OS=Homo sapiens GN=CA2 PE=1 SV=2	6	9	6	29.228	7.4	0.388	0.388	0.367	-1.36	-1.36	-1.45	186.6	72.5	72.5	68.5	1.955	26.0142	6
P15151	Poliovirus receptor OS=Homo sapiens GN=PVR PE=1 SV=2	6	13	6	45.274	6.52	0.309	0.348	0.571	-1.69	-1.52	-0.81	179.5	55.5	62.5	102.5	4.623	34.6342	6
Q92520	Protein FAM3C OS=Homo sapiens GN=FAM3C PE=1 SV=1	6	9	6	24.665	8.29	0.514	0.551	0.922	-0.96	-0.86	-0.12	133.9	68.8	73.7	123.5	2.162	26.3475	6
P05413	Fatty acid-binding protein, heart OS=Homo sapiens GN=FABP3 PE=1 SV=4	6	9	6	14.849	6.8	0.426	0.553	1.005	-1.23	-0.85	0.01	134.1	57.1	74.2	134.7	3.125	27.272	6
P25774	Cathepsin S OS=Homo sapiens GN=CTSS PE=1 SV=3	6	7	6	37.471	8.34	1.128	0.968	0.813	0.17	-0.05	-0.3	102.3	115.4	99.1	83.2	1.154	22.8697	6
P08185	Corticosteroid-binding globulin OS=Homo sapiens GN=SERPINA6 PE=1 SV=1	6	11	6	45.112	6.04	0.507	0.991	1.228	-0.98	-0.01	0.3	107.4	54.5	106.3	131.8	1.637	32.3825	6
P32004	Neural cell adhesion molecule L1 OS=Homo sapiens GN=L1CAM PE=1 SV=2	6	7	6	139.915	6.24	0.635	0.493	0.693	-0.66	-1.02	-0.53	141.8	90	70	98.3	0.24	22.675	6
P27487	Dipeptidyl peptidase 4 OS=Homo sapiens GN=DPP4 PE=1 SV=2	6	8	6	88.222	6.04	0.638	0.571	1.391	-0.65	-0.81	0.48	111.1	70.9	63.5	154.6	0.359	26.717	6
P04275	von Willebrand factor OS=Homo sapiens GN=VWF PE=1 SV=4	6	11	6	309.058	5.48	1.127	1.253	0.895	0.17	0.33	-0.16	93.6	105.4	117.3	83.7	0.11	25.6035	6
Q99497	Protein DJ-1 OS=Homo sapiens GN=PARK7 PE=1 SV=2	6	13	6	19.878	6.79	0.318	0.334	0.503	-1.65	-1.58	-0.99	185.6	59	62	93.4	2.455	33.4701	6
P07355	Annexin A2 OS=Homo sapiens GN=ANXA2 PE=1 SV=2	6	8	6	38.58	7.75	0.561	0.558	0.587	-0.83	-0.84	-0.77	147.8	83	82.5	86.8	0.957	19.8734	6
Q9H444	Charged multivesicular body protein 4b OS=Homo sapiens GN=CHMP4B PE=1 SV=1	6	7	6	24.935	4.82	0.374	0.481	0.582	-1.42	-1.06	-0.78	164.2	61.4	78.9	95.6	1.276	21.1626	6
Q8NDA2	Hemicentin-2 OS=Homo sapiens GN=HMCN2 PE=2 SV=2	6	6	6	542.264	5.83	0.885	0.705	0.687	-0.18	-0.5	-0.54	122.1	108	86.1	83.8	0.056	17.5537	6
P06727	Apolipoprotein A-IV OS=Homo sapiens GN=APOA4 PE=1 SV=3	6	6	6	45.371	5.38	0.822	1.013	0.772	-0.28	0.02	-0.37	110.9	91.1	112.3	85.7	0.638	16.4197	6
P42785	Lysosomal Pro-X carboxypeptidase OS=Homo sapiens GN=PRCP PE=1 SV=1	6	9	6	55.764	7.21	0.738	0.506	0.872	-0.44	-0.98	-0.2	128.4	94.8	64.9	112	1.015	23.141	6
P01857	Ig gamma-1 chain C region OS=Homo sapiens GN=IGHG1 PE=1 SV=1	12	178	5	36.083	8.19	0.994	1.517	0.959	-0.01	0.6	-0.06	89.5	88.9	135.7	85.8	629.957	514.677	12
P01876	Ig alpha-1 chain C region OS=Homo sapiens GN=IGHA1 PE=1 SV=2	11	100	5	37.631	6.51	1.233	1.713	0.688	0.3	0.78	-0.54	86.3	106.4	147.8	59.4	58.948	329.238	11
P68871	Hemoglobin subunit beta OS=Homo sapiens GN=HBB PE=1 SV=2	10	117	5	15.988	7.28	0.248	0.271	0.241	-2.01	-1.88	-2.06	227.3	56.4	61.6	54.7	656.933	392.312	10
P01834	Ig kappa chain C region OS=Homo sapiens GN=IGKC PE=1 SV=1	5	133	5	11.602	5.87	0.753	1.091	1.005	-0.41	0.13	0.01	103.9	78.2	113.4	104.4	63094.7	364.96	5
Q14508	WAP four-disulfide core domain protein 2 OS=Homo sapiens GN=WFDC2 PE=1 SV=2	5	151	5	12.984	4.84	1.73	1.258	1.203	0.79	0.33	0.27	77.1	133.3	96.9	92.7	6811.92	425.292	5
P26842	CD27 antigen OS=Homo sapiens GN=CD27 PE=1 SV=2	5	70	5	29.118	7.64	1.429	1.05	1.137	0.52	0.07	0.19	86.6	123.8	91	98.5	7.733	199.192	5
Q15113	Procollagen C-endopeptidase enhancer 1 OS=Homo sapiens GN=PCOLCE PE=1 SV=2	5	34	5	47.942	7.43	0.86	1.059	0.624	-0.22	0.08	-0.68	112.9	97.1	119.6	70.4	2.311	112.877	5
Q14982	Opioid-binding protein/cell adhesion molecule OS=Homo sapiens GN=OPCML PE=1 SV=1	6	18	5	37.983	6.87	0.763	0.607	0.748	-0.39	-0.72	-0.42	128.3	97.9	77.8	96	2.899	56.8958	6
Q03403	Trefoil factor 2 OS=Homo sapiens GN=TFF2 PE=1 SV=2	5	47	5	14.274	5.81	1.571	0.872	1.824	0.65	-0.2	0.87	75.9	119.3	66.2	138.5	50.795	153.303	5
Q9GZX9	Twisted gastrulation protein homolog 1 OS=Homo sapiens GN=TWSG1 PE=2 SV=1	5	24	5	24.999	5.34	1.271	0.96	1.091	0.35	-0.06	0.13	92.5	117.6	88.8	101	14.849	76.6321	5
P30530	Tyrosine-protein kinase receptor UFO OS=Homo sapiens GN=AXL PE=1 SV=3	5	27	5	98.273	5.43	0.427	0.343	0.898	-1.23	-1.54	-0.15	149.9	64	51.5	134.7	0.73	109.725	5
P01034	Cystatin-C OS=Homo sapiens GN=CST3 PE=1 SV=1	5	27	5	15.789	8.75	0.55	0.541	0.733	-0.86	-0.89	-0.45	141.6	77.9	76.6	103.9	11.589	91.5555	5
P08138	Tumor necrosis factor receptor superfamily member 16 OS=Homo sapiens GN=NGFR PE=1 SV=1	5	21	5	45.154	4.7	1.775	0.874	1.16	0.83	-0.19	0.21	83.2	147.6	72.7	96.5	2.875	77.7113	5
P07942	Laminin subunit beta-1 OS=Homo sapiens GN=LAMB1 PE=1 SV=2	5	13	5	197.909	4.94	1.561	0.989	1.104	0.64	-0.02	0.14	85.9	134.1	85	94.9	0.292	36.9856	5
P11117	Lysosomal acid phosphatase OS=Homo sapiens GN=ACP2 PE=1 SV=3	5	17	5	48.313	6.74	0.469	0.506	1.557	-1.09	-0.98	0.64	113.3	53.1	57.3	176.3	2.675	48.6928	5
P37840	Alpha-synuclein OS=Homo sapiens GN=SNCA PE=1 SV=1	5	11	5	14.451	4.7	0.379	0.417	0.373	-1.4	-1.26	-1.42	184.4	69.8	76.9	68.8	12.335	39.9572	5
P80723	Brain acid soluble protein 1 OS=Homo sapiens GN=BASP1 PE=1 SV=2	5	9	5	22.68	4.63	2.308	1.31	1.119	1.21	0.39	0.16	69.7	160.9	91.3	78	3.125	37.8021	5
Q99988	Growth/differentiation factor 15 OS=Homo sapiens GN=GDF15 PE=1 SV=3	5	13	5	34.119	9.66	1.257	0.883	1.169	0.33	-0.18	0.22	92.8	116.7	82	108.5	3.642	42.7583	5
Q5VY43	Platelet endothelial aggregation receptor 1 OS=Homo sapiens GN=PEAR1 PE=1 SV=1	5	9	5	110.591	6.81	1.413	1.049	0.81	0.5	0.07	-0.3	93.6	132.3	98.2	75.9	0.567	33.1173	5
O75368	SH3 domain-binding glutamic acid-rich-like protein OS=Homo sapiens GN=SH3BGRL PE=1 SV=1	5	18	5	12.766	5.25	1.358	1.124	0.85	0.44	0.17	-0.23	92.4	125.4	103.8	78.5	16.783	46.6307	5
Q96PD5	N-acetylmuramoyl-L-alanine amidase OS=Homo sapiens GN=PGLYRP2 PE=1 SV=1	5	14	5	62.178	7.55	1.218	1.082	1.269	0.28	0.11	0.34	87.6	106.6	94.7	111.1	1.154	50.7923	5
P62979	Ubiquitin-40S ribosomal protein S27a OS=Homo sapiens GN=RPS27A PE=1 SV=2	5	38	5	17.953	9.64	0.944	0.847	0.652	-0.08	-0.24	-0.62	116.2	109.7	98.4	75.7	7.111	118.179	5
P05451	Lithostathine-1-alpha OS=Homo sapiens GN=REG1A PE=1 SV=3	6	46	5	18.719	5.94	0.875	2.185	0.918	-0.19	1.13	-0.12	80.4	70.3	175.6	73.7	15.681	138.732	6
Q13449	Limbic system-associated membrane protein OS=Homo sapiens GN=LSAMP PE=1 SV=2	5	17	5	37.37	6.98	0.519	0.486	1.009	-0.95	-1.04	0.01	132.8	68.9	64.5	133.9	1.721	50.1397	5
O76076	WNT1-inducible-signaling pathway protein 2 OS=Homo sapiens GN=WISP2 PE=1 SV=1	5	13	5	26.807	7.88	1.275	1.477	1.078	0.35	0.56	0.11	82.8	105.6	122.3	89.3	4.623	42.4858	5
P07307	Asialoglycoprotein receptor 2 OS=Homo sapiens GN=ASGR2 PE=1 SV=2	5	11	5	35.07	6.25	1.001	1.219	0.952	0	0.29	-0.07	95.9	96	116.9	91.3	2.162	32.9228	5
P12273	Prolactin-inducible protein OS=Homo sapiens GN=PIP PE=1 SV=1	5	22	5	16.562	8.05	1.175	0.632	3.165	0.23	-0.66	1.66	67	78.7	42.3	212	4.623	59.2649	5
Q8IWY4	Signal peptide, CUB and EGF-like domain-containing protein 1 OS=Homo sapiens GN=SCUBE1 PE=1 SV=3	5	16	5	107.839	6.83	2.616	2.787	1.225	1.39	1.48	0.29	52.4	137.2	146.1	64.2	0.468	39.2351	5
Q9H1U4	Multiple epidermal growth factor-like domains protein 9 OS=Homo sapiens GN=MEGF9 PE=2 SV=3	5	10	5	62.943	5.67	1.406	0.804	0.699	0.49	-0.31	-0.52	102.3	143.9	82.3	71.5	1.462	29.862	5
P07357	Complement component C8 alpha chain OS=Homo sapiens GN=C8A PE=1 SV=2	5	11	5	65.121	6.47	1.139	2.573	0.688	0.19	1.36	-0.54	74.1	84.4	190.6	50.9	0.812	32.7071	5
P22352	Glutathione peroxidase 3 OS=Homo sapiens GN=GPX3 PE=1 SV=2	5	25	5	25.537	8.13	1.034	0.752	1.054	0.05	-0.41	0.08	104.2	107.7	78.4	109.8	3.924	80.7966	5
P17936	Insulin-like growth factor-binding protein 3 OS=Homo sapiens GN=IGFBP3 PE=1 SV=2	5	16	5	31.654	8.69	0.879	1.051	0.709	-0.19	0.07	-0.5	109.9	96.6	115.5	78	1.154	58.5244	5
P16035	Metalloproteinase inhibitor 2 OS=Homo sapiens GN=TIMP2 PE=1 SV=2	5	12	5	24.383	7.49	0.847	0.746	0.808	-0.24	-0.42	-0.31	117.6	99.6	87.7	95.1	2.415	35.6914	5
P07360	Complement component C8 gamma chain OS=Homo sapiens GN=C8G PE=1 SV=3	5	9	5	22.264	8.31	1.268	2.346	0.853	0.34	1.23	-0.23	73.2	92.7	171.7	62.4	2.455	29.7577	5
O15230	Laminin subunit alpha-5 OS=Homo sapiens GN=LAMA5 PE=1 SV=8	5	8	5	399.479	7.02	2.707	1.606	1.331	1.44	0.68	0.41	60.2	163	96.7	80.1	0.084	26.143	5
Q9Y279	V-set and immunoglobulin domain-containing protein 4 OS=Homo sapiens GN=VSIG4 PE=1 SV=1	5	9	5	43.959	6.35	1.13	1.4	0.833	0.18	0.49	-0.26	91.7	103.6	128.4	76.3	0.931	28.9092	5
Q06481	Amyloid-like protein 2 OS=Homo sapiens GN=APLP2 PE=1 SV=2	6	11	5	86.9	4.79	1.597	1.137	1.164	0.68	0.18	0.22	81.7	130.4	92.8	95.1	0.492	28.3624	6
Q14520	Hyaluronan-binding protein 2 OS=Homo sapiens GN=HABP2 PE=1 SV=1	5	9	5	62.63	6.54	1.013	2.265	0.947	0.02	1.18	-0.08	76.6	77.6	173.4	72.5	0.859	30.4684	5
P24593	Insulin-like growth factor-binding protein 5 OS=Homo sapiens GN=IGFBP5 PE=1 SV=1	5	9	5	30.55	8.21	0.831	0.949	0.841	-0.27	-0.07	-0.25	110.4	91.8	104.9	92.9	1.929	29.0868	5
P01040	Cystatin-A OS=Homo sapiens GN=CSTA PE=1 SV=1	5	8	5	11	5.5	1.853	1.73	0.933	0.89	0.79	-0.1	72.5	134.4	125.5	67.6	12.895	26.1105	5
P00740	Coagulation factor IX OS=Homo sapiens GN=F9 PE=1 SV=2	5	5	5	51.745	5.47	1.654	2.261	0.935	0.73	1.18	-0.1	68.4	113.1	154.6	64	0.45	17.5803	5
P50897	Palmitoyl-protein thioesterase 1 OS=Homo sapiens GN=PPT1 PE=1 SV=1	5	10	5	34.171	6.52	1.309	0.948	1.263	0.39	-0.08	0.34	88.5	115.8	83.9	111.8	1.929	26.6647	5
P01033	Metalloproteinase inhibitor 1 OS=Homo sapiens GN=TIMP1 PE=1 SV=1	5	9	5	23.156	8.1	0.508	0.435	0.586	-0.98	-1.2	-0.77	158.2	80.4	68.8	92.6	2.511	31.0026	5
P34059	N-acetylgalactosamine-6-sulfatase OS=Homo sapiens GN=GALNS PE=1 SV=1	5	7	5	57.989	6.74	0.721	0.537	0.997	-0.47	-0.9	0	122.9	88.6	66	122.5	0.743	23.8823	5
P22692	Insulin-like growth factor-binding protein 4 OS=Homo sapiens GN=IGFBP4 PE=1 SV=2	5	7	5	27.915	7.15	1.058	1.553	1.028	0.08	0.63	0.04	86.2	91.2	133.9	88.7	1.371	26.3949	5
P04792	Heat shock protein beta-1 OS=Homo sapiens GN=HSPB1 PE=1 SV=2	5	6	5	22.768	6.4	0.713	0.655	0.811	-0.49	-0.61	-0.3	125.9	89.7	82.4	102.1	1.894	15.8466	5
Q6PK18	PKHD domain-containing transmembrane protein C17orf101 OS=Homo sapiens GN=C17orf101 PE=2 SV=2	5	6	5	35.624	8.18	0.596	0.458	0.712	-0.75	-1.13	-0.49	144.6	86.2	66.2	102.9	1.154	19.6412	5
O95998	Interleukin-18-binding protein OS=Homo sapiens GN=IL18BP PE=1 SV=2	5	19	5	21.086	7.39	0.396	0.451	0.6	-1.34	-1.15	-0.74	163.5	64.7	73.7	98	2.981	63.0072	5
Q9NPH3	Interleukin-1 receptor accessory protein OS=Homo sapiens GN=IL1RAP PE=1 SV=2	5	8	5	65.377	8.12	0.373	0.698	0.784	-1.42	-0.52	-0.35	140.1	52.3	97.8	109.8	0.468	25.1379	5
Q08345	Epithelial discoidin domain-containing receptor 1 OS=Homo sapiens GN=DDR1 PE=1 SV=1	5	8	5	101.063	6.83	0.561	0.434	1.126	-0.83	-1.2	0.17	128.2	71.9	55.6	144.3	0.482	21.8614	5
Q7KYR7	Butyrophilin subfamily 2 member A1 OS=Homo sapiens GN=BTN2A1 PE=1 SV=3	5	14	5	59.594	6.48	1.087	0.765	0.804	0.12	-0.39	-0.32	109.4	118.9	83.7	87.9	0.585	41.3411	5
P40189	Interleukin-6 receptor subunit beta OS=Homo sapiens GN=IL6ST PE=1 SV=2	5	7	5	103.471	5.95	0.679	0.816	0.842	-0.56	-0.29	-0.25	119.9	81.4	97.8	100.9	0.355	14.8598	5
Q9UM47	Neurogenic locus notch homolog protein 3 OS=Homo sapiens GN=NOTCH3 PE=1 SV=2	5	6	5	243.468	5.39	1.525	1.301	0.922	0.61	0.38	-0.12	84.3	128.5	109.6	77.7	0.144	20.4594	5
P54107	Cysteine-rich secretory protein 1 OS=Homo sapiens GN=CRISP1 PE=1 SV=1	5	5	5	28.462	5.91	2.031	0.561	3.613	1.02	-0.83	1.85	55.5	112.8	31.1	200.6	1.61	16.3537	5
O95980	Reversion-inducing cysteine-rich protein with Kazal motifs OS=Homo sapiens GN=RECK PE=1 SV=1	5	9	5	106.386	6.74	1.258	0.939	0.956	0.33	-0.09	-0.07	96.3	121.2	90.4	92.1	0.355	24.0563	5
Q13308	Inactive tyrosine-protein kinase 7 OS=Homo sapiens GN=PTK7 PE=1 SV=2	5	7	5	118.317	7.09	0.486	0.41	0.66	-1.04	-1.29	-0.6	156.5	76.1	64.1	103.3	0.241	21.9211	5
Q12841	Follistatin-related protein 1 OS=Homo sapiens GN=FSTL1 PE=1 SV=1	5	9	5	34.963	5.52	0.552	0.397	0.887	-0.86	-1.33	-0.17	141	77.8	56	125.2	1.015	26.7764	5
P23470	Receptor-type tyrosine-protein phosphatase gamma OS=Homo sapiens GN=PTPRG PE=1 SV=4	5	10	5	161.901	6.42	0.778	0.826	0.889	-0.36	-0.28	-0.17	114.5	89.1	94.6	101.8	0.236	31.2229	5
P52799	Ephrin-B2 OS=Homo sapiens GN=EFNB2 PE=1 SV=1	5	6	5	36.9	8.85	1.019	1.145	1.024	0.03	0.2	0.03	95.5	97.4	109.4	97.8	1.154	21.3699	5
P04083	Annexin A1 OS=Homo sapiens GN=ANXA1 PE=1 SV=2	5	6	5	38.69	7.02	0.673	0.636	0.512	-0.57	-0.65	-0.97	141.8	95.5	90.2	72.5	0.73	18.5658	5
P55285	Cadherin-6 OS=Homo sapiens GN=CDH6 PE=1 SV=1	5	5	5	88.254	4.93	0.204	0.25	0.566	-2.29	-2	-0.82	197.9	40.5	49.5	112.1	0.315	15.9163	5
P06734	Low affinity immunoglobulin epsilon Fc receptor OS=Homo sapiens GN=FCER2 PE=1 SV=1	5	6	5	36.446	5.57	0.899	0.906	1.001	-0.15	-0.14	0	105.1	94.5	95.2	105.2	0.995	13.9865	5
P12955	Xaa-Pro dipeptidase OS=Homo sapiens GN=PEPD PE=1 SV=3	5	5	5	54.513	6	1.039	0.787	1.711	0.05	-0.34	0.78	88.2	91.6	69.4	150.9	0.557	16.351	5
O75347	Tubulin-specific chaperone A OS=Homo sapiens GN=TBCA PE=1 SV=3	5	6	5	12.847	5.29	0.418	0.397	0.56	-1.26	-1.33	-0.84	168.4	70.4	66.8	94.4	6.197	20.2527	5
Q8IZA0	Dyslexia-associated protein KIAA0319-like protein OS=Homo sapiens GN=KIAA0319L PE=1 SV=2	5	8	5	115.586	6.05	0.847	0.683	0.814	-0.24	-0.55	-0.3	119.6	101.3	81.7	97.4	0.284	24.6678	5
P22891	Vitamin K-dependent protein Z OS=Homo sapiens GN=PROZ PE=1 SV=2	5	8	5	44.715	5.97	0.514	0.562	1.288	-0.96	-0.83	0.36	118.9	61.1	66.9	153.1	0.738	23.8159	5
P10586	Receptor-type tyrosine-protein phosphatase F OS=Homo sapiens GN=PTPRF PE=1 SV=2	5	6	5	212.744	6.3	1.175	1.106	1.054	0.23	0.15	0.08	92.3	108.4	102.1	97.3	0.109	18.1623	5
P02743	Serum amyloid P-component OS=Homo sapiens GN=APCS PE=1 SV=2	5	8	5	25.371	6.54	0.566	0.534	0.538	-0.82	-0.91	-0.9	151.7	85.8	81	81.6	1.848	22.1536	5
P01871	Ig mu chain C region OS=Homo sapiens GN=IGHM PE=1 SV=3	5	5	5	49.276	6.77	0.781	1.062	0.677	-0.36	0.09	-0.56	113.6	88.7	120.7	76.9	0.487	13.9765	5
P07237	Protein disulfide-isomerase OS=Homo sapiens GN=P4HB PE=1 SV=3	5	6	5	57.081	4.87	0.44	0.394	0.768	-1.19	-1.34	-0.38	153.7	67.6	60.6	118.1	0.334	15.8929	5
P48637	Glutathione synthetase OS=Homo sapiens GN=GSS PE=1 SV=1	5	6	5	52.352	5.92	0.415	0.412	0.74	-1.27	-1.28	-0.43	155.8	64.7	64.1	115.3	0.417	19.5222	5
Q6UVK1	Chondroitin sulfate proteoglycan 4 OS=Homo sapiens GN=CSPG4 PE=1 SV=2	5	6	5	250.382	5.47	0.744	0.907	0.777	-0.43	-0.14	-0.36	116.7	86.8	105.8	90.7	0.122	14.0747	5
P0DJD8	Pepsin A-3 OS=Homo sapiens GN=PGA3 PE=1 SV=1	5	16	5	41.95	4.41	0.869	0.93	1.196	-0.2	-0.1	0.26	100.1	87	93.1	119.7	14.849	43.8129	5
P01591	Immunoglobulin J chain OS=Homo sapiens GN=IGJ PE=1 SV=4	5	6	5	18.087	5.24	0.708	0.777	0.704	-0.5	-0.36	-0.51	125.4	88.8	97.5	88.3	2.981	14.9742	5
Q92563	Testican-2 OS=Homo sapiens GN=SPOCK2 PE=1 SV=1	5	5	5	46.749	4.83	0.786	0.753	0.982	-0.35	-0.41	-0.03	113.6	89.3	85.6	111.6	0.65	11.4376	5
P01859	Ig gamma-2 chain C region OS=Homo sapiens GN=IGHG2 PE=1 SV=2	10	165	4	35.878	7.59	0.875	1.081	0.782	-0.19	0.11	-0.35	107	93.6	115.7	83.7	226.585	496.059	10
P01861	Ig gamma-4 chain C region OS=Homo sapiens GN=IGHG4 PE=1 SV=1	9	101	4	35.918	7.36	1.336	1.957	1.139	0.42	0.97	0.19	73.6	98.4	144.1	83.9	45.416	255.864	9
P01877	Ig alpha-2 chain C region OS=Homo sapiens GN=IGHA2 PE=1 SV=3	10	52	4	36.503	6.1	0.911	1.085	0.821	-0.13	0.12	-0.28	104.8	95.4	113.7	86	28.552	140.391	10
Q92956	Tumor necrosis factor receptor superfamily member 14 OS=Homo sapiens GN=TNFRSF14 PE=1 SV=3	4	43	4	30.372	7.15	1.58	1.189	1.195	0.66	0.25	0.26	80.6	127.3	95.8	96.3	23.245	112.152	4
P07108	Acyl-CoA-binding protein OS=Homo sapiens GN=DBI PE=1 SV=2	4	18	4	10.038	6.57	1.238	0.937	0.961	0.31	-0.09	-0.06	96.7	119.8	90.6	92.9	629.957	69.0419	4
P07478	Trypsin-2 OS=Homo sapiens GN=PRSS2 PE=1 SV=1	6	27	4	26.471	4.92	1.447	1.8	0.846	0.53	0.85	-0.24	78.5	113.7	141.3	66.5	30.623	60.885	6
Q6UXG3	CMRF35-like molecule 9 OS=Homo sapiens GN=CD300LG PE=1 SV=2	4	48	4	36.037	5.92	0.745	0.611	1.075	-0.42	-0.71	0.1	116.6	86.9	71.2	125.3	7.377	144.316	4
P54108	Cysteine-rich secretory protein 3 OS=Homo sapiens GN=CRISP3 PE=1 SV=1	4	43	4	27.612	7.8	1.134	1.013	1.181	0.18	0.02	0.24	92.4	104.8	93.6	109.1	11.115	112.468	4
P05787	Keratin, type II cytoskeletal 8 OS=Homo sapiens GN=KRT8 PE=1 SV=7	8	18	4	53.671	5.59	1.054	0.915	1.013	0.08	-0.13	0.02	100.4	105.9	91.9	101.8	1.412	64.4247	8
Q9HD89	Resistin OS=Homo sapiens GN=RETN PE=2 SV=1	4	16	4	11.411	6.86	1.444	0.961	0.767	0.53	-0.06	-0.38	95.9	138.5	92.1	73.6	36.276	53.4086	4
Q6GTX8	Leukocyte-associated immunoglobulin-like receptor 1 OS=Homo sapiens GN=LAIR1 PE=1 SV=1	5	31	4	31.393	5.63	1.375	0.962	1.312	0.46	-0.06	0.39	86	118.3	82.7	112.9	11.328	92.91	5
P11684	Uteroglobin OS=Homo sapiens GN=SCGB1A1 PE=1 SV=1	4	29	4	9.987	5.06	1.783	3.531	1.313	0.83	1.82	0.39	52.4	93.5	185.2	68.9	99	103.537	4
Q9P121	Neurotrimin OS=Homo sapiens GN=NTM PE=1 SV=1	5	14	4	37.947	7.81	0.55	0.578	0.784	-0.86	-0.79	-0.35	137.4	75.5	79.4	107.7	1.848	43.8054	5
P24855	Deoxyribonuclease-1 OS=Homo sapiens GN=DNASE1 PE=1 SV=1	4	22	4	31.414	4.91	0.482	0.424	1.878	-1.05	-1.24	0.91	105.7	50.9	44.8	198.6	6.017	53.1575	4
Q96FE7	Phosphoinositide-3-kinase-interacting protein 1 OS=Homo sapiens GN=PIK3IP1 PE=1 SV=2	4	136	4	28.23	5.01	1.888	1.29	1.229	0.92	0.37	0.3	74	139.7	95.4	90.9	4.623	434.726	4
P48304	Lithostathine-1-beta OS=Homo sapiens GN=REG1B PE=1 SV=1	5	32	4	18.653	5.95	1.562	5.232	0.91	0.64	2.39	-0.14	46	71.8	240.4	41.8	36.276	100.069	5
O94910	Latrophilin-1 OS=Homo sapiens GN=LPHN1 PE=1 SV=1	4	15	4	162.614	6.6	1.296	1.074	1.138	0.37	0.1	0.19	88.7	115	95.3	101	0.323	49.9369	4
P07204	Thrombomodulin OS=Homo sapiens GN=THBD PE=1 SV=2	4	13	4	60.289	4.92	0.971	0.727	0.812	-0.04	-0.46	-0.3	114	110.7	82.8	92.6	1.955	42.3692	4
P10646	Tissue factor pathway inhibitor OS=Homo sapiens GN=TFPI PE=1 SV=1	4	14	4	34.992	8.25	1.296	1.065	1.125	0.37	0.09	0.17	89.2	115.5	94.9	100.4	2.981	33.6904	4
Q02747	Guanylin OS=Homo sapiens GN=GUCA2A PE=1 SV=2	4	13	4	12.38	4.59	0.976	0.672	0.791	-0.04	-0.57	-0.34	116.3	113.5	78.1	92	62.096	38.145	4
P26038	Moesin OS=Homo sapiens GN=MSN PE=1 SV=3	8	10	4	67.778	6.4	0.869	0.65	0.758	-0.2	-0.62	-0.4	122	106.1	79.4	92.5	0.567	33.0005	8
Q8N114	Protein shisa-5 OS=Homo sapiens GN=SHISA5 PE=2 SV=1	4	9	4	25.564	6.68	1.612	1.703	1.29	0.69	0.77	0.37	71.4	115	121.6	92.1	12.895	29.1175	4
Q96AP7	Endothelial cell-selective adhesion molecule OS=Homo sapiens GN=ESAM PE=1 SV=1	4	10	4	41.151	9.32	1.616	1.973	1.455	0.69	0.98	0.54	66.2	106.9	130.6	96.3	0.931	40.8865	4
P06681	Complement C2 OS=Homo sapiens GN=C2 PE=1 SV=2	4	13	4	83.214	7.42	2.438	4.698	0.826	1.29	2.23	-0.28	44.6	108.8	209.7	36.9	0.409	33.8564	4
P19256	Lymphocyte function-associated antigen 3 OS=Homo sapiens GN=CD58 PE=1 SV=1	4	12	4	28.129	6.76	0.877	0.719	0.779	-0.19	-0.48	-0.36	118.6	104	85.2	92.3	4.337	24.6107	4
Q92496	Complement factor H-related protein 4 OS=Homo sapiens GN=CFHR4 PE=1 SV=2	4	13	4	37.274	5.26	0.974	2.537	0.914	-0.04	1.34	-0.13	73.7	71.8	187.1	67.4	2.455	33.048	4
P09871	Complement C1s subcomponent OS=Homo sapiens GN=C1S PE=1 SV=1	4	7	4	76.635	4.96	1.295	2.08	0.845	0.37	1.06	-0.24	76.6	99.2	159.4	64.7	0.607	19.3751	4
Q9NZP8	Complement C1r subcomponent-like protein OS=Homo sapiens GN=C1RL PE=1 SV=2	4	16	4	53.464	7.2	0.405	0.492	0.846	-1.3	-1.02	-0.24	145.8	59.1	71.7	123.3	0.817	44.3869	4
P22792	Carboxypeptidase N subunit 2 OS=Homo sapiens GN=CPN2 PE=1 SV=3	4	12	4	60.518	5.99	0.473	0.571	0.613	-1.08	-0.81	-0.7	150.5	71.2	85.9	92.3	0.957	41.3232	4
O00187	Mannan-binding lectin serine protease 2 OS=Homo sapiens GN=MASP2 PE=1 SV=4	4	23	4	75.654	5.63	0.406	0.391	0.959	-1.3	-1.36	-0.06	145.2	59	56.7	139.2	0.484	72.1695	4
P15311	Ezrin OS=Homo sapiens GN=EZR PE=1 SV=4	8	9	4	69.37	6.27	0.636	0.559	0.745	-0.65	-0.84	-0.42	136.1	86.5	76	101.4	0.604	27.062	8
P24592	Insulin-like growth factor-binding protein 6 OS=Homo sapiens GN=IGFBP6 PE=1 SV=1	4	9	4	25.306	7.81	1.043	1.606	1.056	0.06	0.68	0.08	85	88.7	136.5	89.8	1.894	22.745	4
Q9UKU9	Angiopoietin-related protein 2 OS=Homo sapiens GN=ANGPTL2 PE=2 SV=1	4	7	4	57.068	7.53	0.564	0.534	1.25	-0.83	-0.91	0.32	119.5	67.4	63.8	149.3	0.54	23.2013	4
P43251	Biotinidase OS=Homo sapiens GN=BTD PE=1 SV=2	4	11	4	61.093	6.25	0.53	0.695	1.033	-0.92	-0.53	0.05	122.8	65.1	85.3	126.9	0.957	27.935	4
Q15375	Ephrin type-A receptor 7 OS=Homo sapiens GN=EPHA7 PE=1 SV=3	4	7	4	112.024	5.8	0.598	0.637	0.893	-0.74	-0.65	-0.16	127.9	76.4	81.5	114.2	0.215	25.8259	4
P29966	Myristoylated alanine-rich C-kinase substrate OS=Homo sapiens GN=MARCKS PE=1 SV=4	4	5	4	31.536	4.45	1.005	1.476	1.022	0.01	0.56	0.03	88.8	89.3	131.1	90.7	1.61	18.2197	4
O95274	Ly6/PLAUR domain-containing protein 3 OS=Homo sapiens GN=LYPD3 PE=1 SV=2	4	9	4	35.948	7.75	1.409	0.974	0.963	0.49	-0.04	-0.05	92	129.7	89.7	88.6	0.73	35.1884	4
Q9HBB8	Cadherin-related family member 5 OS=Homo sapiens GN=CDHR5 PE=1 SV=3	4	8	4	88.169	4.93	0.672	0.719	0.895	-0.57	-0.48	-0.16	121.7	81.8	87.5	109	0.557	26.0539	4
P26447	Protein S100-A4 OS=Homo sapiens GN=S100A4 PE=1 SV=1	4	13	4	11.721	6.11	0.723	0.349	0.323	-0.47	-1.52	-1.63	167	120.7	58.4	53.9	9	42.7638	4
P02452	Collagen alpha-1(I) chain OS=Homo sapiens GN=COL1A1 PE=1 SV=5	4	11	4	138.857	5.8	1.798	1.665	1.277	0.85	0.74	0.35	69.7	125.3	116	89	0.166	35.1067	4
O75487	Glypican-4 OS=Homo sapiens GN=GPC4 PE=1 SV=4	4	5	4	62.372	6.68	0.582	0.634	0.75	-0.78	-0.66	-0.41	134.9	78.5	85.5	101.2	0.433	18.0439	4
P27918	Properdin OS=Homo sapiens GN=CFP PE=1 SV=2	4	5	4	51.242	7.9	3.671	2.423	0.688	1.88	1.28	-0.54	51.4	188.7	124.6	35.4	0.616	17.3599	4
Q15485	Ficolin-2 OS=Homo sapiens GN=FCN2 PE=1 SV=2	4	8	4	33.98	6.77	0.395	0.446	0.596	-1.34	-1.17	-0.75	164.2	64.8	73.2	97.8	1.154	24.0168	4
P17813	Endoglin OS=Homo sapiens GN=ENG PE=1 SV=2	4	5	4	70.533	6.61	0.433	0.594	0.779	-1.21	-0.75	-0.36	142.6	61.7	84.7	111	0.468	17.265	4
P13727	Bone marrow proteoglycan OS=Homo sapiens GN=PRG2 PE=1 SV=2	4	8	4	25.189	6.76	0.818	0.508	1.234	-0.29	-0.98	0.3	112.3	91.9	57.1	138.7	1.512	25.2338	4
P18206	Vinculin OS=Homo sapiens GN=VCL PE=1 SV=4	4	5	4	123.722	5.66	1.795	1.05	1.158	0.84	0.07	0.21	80	143.5	83.9	92.6	0.147	16.5475	4
P16562	Cysteine-rich secretory protein 2 OS=Homo sapiens GN=CRISP2 PE=1 SV=1	4	6	4	27.241	6.49	0.882	0.745	0.777	-0.18	-0.42	-0.36	117.5	103.7	87.6	91.3	1.61	19.1445	4
Q92692	Poliovirus receptor-related protein 2 OS=Homo sapiens GN=PVRL2 PE=1 SV=1	4	7	4	57.706	4.82	0.224	0.314	0.959	-2.16	-1.67	-0.06	160.2	36	50.2	153.6	0.509	25.8173	4
Q969P0	Immunoglobulin superfamily member 8 OS=Homo sapiens GN=IGSF8 PE=1 SV=1	4	8	4	64.994	8	0.375	0.321	0.553	-1.41	-1.64	-0.85	177.8	66.8	57	98.4	0.468	31.7456	4
P30740	Leukocyte elastase inhibitor OS=Homo sapiens GN=SERPINB1 PE=1 SV=1	4	5	4	42.715	6.28	2.205	1.135	0.906	1.14	0.18	-0.14	76.2	168.1	86.5	69.1	0.65	17.4078	4
Q8N6Q3	CD177 antigen OS=Homo sapiens GN=CD177 PE=1 SV=2	4	9	4	46.332	6.29	1.614	1.373	0.807	0.69	0.46	-0.31	83.4	134.7	114.5	67.3	1.154	23.8164	4
P08107	Heat shock 70 kDa protein 1A/1B OS=Homo sapiens GN=HSPA1A PE=1 SV=5	4	6	4	70.009	5.66	0.54	0.436	0.64	-0.89	-1.2	-0.64	152.9	82.5	66.7	97.8	0.354	20.9256	4
P00746	Complement factor D OS=Homo sapiens GN=CFD PE=1 SV=5	4	6	4	27.016	7.71	0.636	0.977	1.062	-0.65	-0.03	0.09	108.8	69.2	106.3	115.6	0.931	23.8644	4
P11279	Lysosome-associated membrane glycoprotein 1 OS=Homo sapiens GN=LAMP1 PE=1 SV=3	4	12	4	44.854	8.75	1.549	1.324	1.087	0.63	0.4	0.12	80.6	124.9	106.8	87.7	0.823	32.2098	4
P51654	Glypican-3 OS=Homo sapiens GN=GPC3 PE=1 SV=1	4	8	4	65.52	6.37	0.574	0.618	1.068	-0.8	-0.69	0.1	122.7	70.4	75.8	131.1	0.743	18.2178	4
Q13873	Bone morphogenetic protein receptor type-2 OS=Homo sapiens GN=BMPR2 PE=1 SV=2	4	9	4	115.129	6.2	1.557	0.945	1.341	0.64	-0.08	0.42	82.6	128.6	78	110.7	0.212	29.1874	4
Q99584	Protein S100-A13 OS=Homo sapiens GN=S100A13 PE=1 SV=1	4	6	4	11.464	6.16	0.61	0.579	0.769	-0.71	-0.79	-0.38	135.2	82.4	78.3	104	4.179	20.1477	4
P36957	Dihydrolipoyllysine-residue succinyltransferase component of 2-oxoglutarate dehydrogenase complex, mitochondrial OS=Homo sapiens GN=DLST PE=1 SV=4	4	7	4	48.724	8.95	0.673	0.602	0.868	-0.57	-0.73	-0.2	127.3	85.6	76.6	110.5	0.616	24.0003	4
P58499	Protein FAM3B OS=Homo sapiens GN=FAM3B PE=1 SV=2	4	9	4	25.965	8.75	0.299	0.327	0.653	-1.74	-1.61	-0.62	175.5	52.5	57.4	114.6	1.054	23.13	4
P01031	Complement C5 OS=Homo sapiens GN=C5 PE=1 SV=4	4	6	4	188.186	6.52	1.393	5.024	0.732	0.48	2.33	-0.45	49.1	68.4	246.6	36	0.096	21.6957	4
Q9BZR6	Reticulon-4 receptor OS=Homo sapiens GN=RTN4R PE=1 SV=1	4	5	4	50.676	8.87	0.746	0.679	0.995	-0.42	-0.56	-0.01	117	87.2	79.4	116.4	0.374	18.0499	4
P30043	Flavin reductase (NADPH) OS=Homo sapiens GN=BLVRB PE=1 SV=3	4	5	4	22.105	7.65	0.539	0.476	0.544	-0.89	-1.07	-0.88	156.3	84.3	74.4	85	1.848	15.2613	4
P67936	Tropomyosin alpha-4 chain OS=Homo sapiens GN=TPM4 PE=1 SV=3	6	13	4	28.504	4.69	1.087	0.799	0.591	0.12	-0.32	-0.76	115	125.1	91.9	68	0.931	33.9958	6
Q08554	Desmocollin-1 OS=Homo sapiens GN=DSC1 PE=1 SV=2	4	5	4	99.924	5.43	1.031	2.603	1.027	0.04	1.38	0.04	70.7	72.8	183.9	72.6	0.253	13.9412	4
P04066	Tissue alpha-L-fucosidase OS=Homo sapiens GN=FUCA1 PE=1 SV=4	4	6	4	53.655	6.84	0.815	0.757	1.775	-0.29	-0.4	0.83	92	75	69.7	163.3	0.585	18.1625	4
P05546	Heparin cofactor 2 OS=Homo sapiens GN=SERPIND1 PE=1 SV=3	4	7	4	57.034	6.9	1.282	1.506	0.931	0.36	0.59	-0.1	84.8	108.7	127.6	78.9	0.562	19.9836	4
P23528	Cofilin-1 OS=Homo sapiens GN=CFL1 PE=1 SV=3	4	5	4	18.491	8.09	0.247	0.279	0.374	-2.02	-1.84	-1.42	210.5	52	58.8	78.7	1.154	18.9781	4
P08519	Apolipoprotein(a) OS=Homo sapiens GN=LPA PE=1 SV=1	4	9	4	500.995	5.88	1.153	0.704	0.797	0.21	-0.51	-0.33	109.5	126.2	77.1	87.2	0.067	30.5409	4
P09237	Matrilysin OS=Homo sapiens GN=MMP7 PE=1 SV=1	4	12	4	29.658	7.91	0.5	0.349	0.64	-1	-1.52	-0.64	160.7	80.4	56.1	102.8	1.894	33.115	4
Q07075	Glutamyl aminopeptidase OS=Homo sapiens GN=ENPEP PE=1 SV=3	4	5	4	109.176	5.47	0.954	0.985	0.852	-0.07	-0.02	-0.23	105.5	100.7	103.9	89.9	0.22	11.4465	4
P04180	Phosphatidylcholine-sterol acyltransferase OS=Homo sapiens GN=LCAT PE=1 SV=1	4	7	4	49.546	6.11	0.591	0.65	1.088	-0.76	-0.62	0.12	120.2	71	78.1	130.7	0.931	15.8111	4
P23471	Receptor-type tyrosine-protein phosphatase zeta OS=Homo sapiens GN=PTPRZ1 PE=1 SV=4	4	6	4	254.429	4.88	0.894	0.62	0.516	-0.16	-0.69	-0.95	132	118	81.9	68.1	0.123	17.9578	4
Q8IZP9	G-protein coupled receptor 64 OS=Homo sapiens GN=GPR64 PE=1 SV=2	4	6	4	111.521	7.55	1.929	1.433	1.237	0.95	0.52	0.31	71.4	137.8	102.4	88.4	0.252	18.4163	4
P52823	Stanniocalcin-1 OS=Homo sapiens GN=STC1 PE=1 SV=1	4	4	4	27.604	7.99	1.081	1.019	1.255	0.11	0.03	0.33	91.8	99.3	93.6	115.3	0.719	13.4286	4
Q08174	Protocadherin-1 OS=Homo sapiens GN=PCDH1 PE=1 SV=2	4	7	4	114.673	5.03	0.461	0.453	0.612	-1.12	-1.14	-0.71	158.4	73	71.7	96.9	0.259	17.5065	4
P09619	Platelet-derived growth factor receptor beta OS=Homo sapiens GN=PDGFRB PE=1 SV=1	4	4	4	123.889	4.98	0.571	0.68	0.972	-0.81	-0.56	-0.04	124.1	70.9	84.4	120.6	0.198	12.3261	4
P35613	Basigin OS=Homo sapiens GN=BSG PE=1 SV=2	4	4	4	42.174	5.66	1.109	0.898	0.788	0.15	-0.16	-0.34	105.4	116.9	94.6	83.1	0.585	11.3961	4
Q16363	Laminin subunit alpha-4 OS=Homo sapiens GN=LAMA4 PE=1 SV=4	4	4	4	202.397	6.28	0.979	0.516	0.65	-0.03	-0.96	-0.62	127.2	124.5	65.6	82.7	0.085	10.8792	4
P10412	Histone H1.4 OS=Homo sapiens GN=HIST1H1E PE=1 SV=2	4	4	4	21.852	11.03	0.96	0.348	0.343	-0.06	-1.52	-1.54	150.9	144.9	52.5	51.7	1.154	12.9228	4
P05026	Sodium/potassium-transporting ATPase subunit beta-1 OS=Homo sapiens GN=ATP1B1 PE=1 SV=1	4	5	4	35.039	8.53	0.534	0.438	0.714	-0.91	-1.19	-0.49	148.9	79.5	65.3	106.3	0.719	12.6796	4
P30044	Peroxiredoxin-5, mitochondrial OS=Homo sapiens GN=PRDX5 PE=1 SV=4	4	4	4	22.073	8.7	0.314	0.324	0.6	-1.67	-1.62	-0.74	178.7	56.1	58	107.2	1.031	10.5967	4
Q9UGM5	Fetuin-B OS=Homo sapiens GN=FETUB PE=1 SV=2	4	4	4	42.028	6.83	1.341	1.297	1.214	0.42	0.38	0.28	82.4	110.5	106.9	100.1	0.52	10.5631	4
Q8NFT8	Delta and Notch-like epidermal growth factor-related receptor OS=Homo sapiens GN=DNER PE=1 SV=1	4	5	4	78.422	5.17	1.64	0.984	0.855	0.71	-0.02	-0.23	89.3	146.5	87.9	76.3	0.425	14.6205	4
Q9Y639	Neuroplastin OS=Homo sapiens GN=NPTN PE=1 SV=2	4	4	4	44.36	7.99	0.463	0.52	0.665	-1.11	-0.94	-0.59	151.1	69.9	78.5	100.4	0.468	12.8992	4
P98088	Mucin-5AC (Fragments) OS=Homo sapiens GN=MUC5AC PE=1 SV=3	4	4	4	526.271	6.9	1.897	1.03	0.795	0.92	0.04	-0.33	84.7	160.7	87.3	67.3	0.047	11.5205	4
Q02413	Desmoglein-1 OS=Homo sapiens GN=DSG1 PE=1 SV=2	4	5	4	113.676	5.03	0.871	0.959	0.721	-0.2	-0.06	-0.47	112.6	98.1	108.1	81.3	0.233	14.3227	4
P05062	Fructose-bisphosphate aldolase B OS=Homo sapiens GN=ALDOB PE=1 SV=2	4	5	4	39.448	7.87	0.609	0.9	0.71	-0.72	-0.15	-0.49	124.3	75.6	111.8	88.2	0.778	13.9194	4
O94772	Lymphocyte antigen 6H OS=Homo sapiens GN=LY6H PE=2 SV=1	4	8	4	14.659	7.25	1.461	1.171	0.967	0.55	0.23	-0.05	87	127	101.8	84.1	1.783	28.1671	4
O95336	6-phosphogluconolactonase OS=Homo sapiens GN=PGLS PE=1 SV=2	4	5	4	27.53	6.05	0.825	0.838	0.761	-0.28	-0.25	-0.39	116.8	96.4	97.9	88.9	1.154	13.5888	4
Q5JRA6	Melanoma inhibitory activity protein 3 OS=Homo sapiens GN=MIA3 PE=1 SV=1	4	4	4	213.57	4.84	0.651	0.665	1.043	-0.62	-0.59	0.06	119	77.5	79.2	124.2	0.077	13.312	4
P29323	Ephrin type-B receptor 2 OS=Homo sapiens GN=EPHB2 PE=1 SV=5	4	4	4	117.417	6.55	0.853	0.757	0.972	-0.23	-0.4	-0.04	111.7	95.3	84.5	108.5	0.179	12.0001	4
P54727	UV excision repair protein RAD23 homolog B OS=Homo sapiens GN=RAD23B PE=1 SV=1	4	4	4	43.145	4.84	0.492	0.567	0.761	-1.02	-0.82	-0.39	141.9	69.8	80.4	107.9	0.719	11.3867	4
Q96KN2	Beta-Ala-His dipeptidase OS=Homo sapiens GN=CNDP1 PE=1 SV=4	4	5	4	56.67	5.3	0.805	0.947	1.016	-0.31	-0.08	0.02	106.2	85.5	100.5	107.8	0.374	13.8833	4
P30041	Peroxiredoxin-6 OS=Homo sapiens GN=PRDX6 PE=1 SV=3	4	4	4	25.019	6.38	0.37	0.295	0.421	-1.43	-1.76	-1.25	191.7	71	56.5	80.8	0.778	11.5122	4
Q7LBR1	Charged multivesicular body protein 1b OS=Homo sapiens GN=CHMP1B PE=1 SV=1	4	5	4	22.095	8.1	0.326	0.385	0.632	-1.62	-1.38	-0.66	170.7	55.6	65.7	107.9	1.848	13.4343	4
Q8TB96	T-cell immunomodulatory protein OS=Homo sapiens GN=ITFG1 PE=1 SV=1	4	5	4	68.064	5.39	0.305	0.456	0.626	-1.71	-1.13	-0.68	167.6	51.1	76.4	104.9	0.52	10.8181	4
P02042	Hemoglobin subunit delta OS=Homo sapiens GN=HBD PE=1 SV=2	8	69	3	16.045	8.05	0.327	0.448	0.386	-1.61	-1.16	-1.37	185.1	60.5	82.9	71.5	80.113	239.141	8
B9A064	Immunoglobulin lambda-like polypeptide 5 OS=Homo sapiens GN=IGLL5 PE=2 SV=2	6	67	3	23.049	8.84	0.994	1.495	0.774	-0.01	0.58	-0.37	93.8	93.3	140.3	72.6	16.783	242.848	6
P08779	Keratin, type I cytoskeletal 16 OS=Homo sapiens GN=KRT16 PE=1 SV=4	11	22	3	51.236	5.05	2.007	3.364	1.349	1	1.75	0.43	51.8	104	174.3	69.9	1.202	75.4983	11
Q10588	ADP-ribosyl cyclase 2 OS=Homo sapiens GN=BST1 PE=1 SV=2	3	14	3	35.701	7.8	0.597	0.648	1.417	-0.74	-0.63	0.5	109.2	65.2	70.8	154.8	1.818	46.1026	3
P07477	Trypsin-1 OS=Homo sapiens GN=PRSS1 PE=1 SV=1	4	24	3	26.541	6.51	1.823	1.86	1.068	0.87	0.9	0.09	69.6	126.8	129.4	74.3	7.483	51.3429	4
O75015	Low affinity immunoglobulin gamma Fc region receptor III-B OS=Homo sapiens GN=FCGR3B PE=1 SV=2	6	32	3	26.199	6.71	0.349	0.39	0.762	-1.52	-1.36	-0.39	159.9	55.9	62.4	121.8	9	92.8326	6
P04216	Thy-1 membrane glycoprotein OS=Homo sapiens GN=THY1 PE=1 SV=2	3	17	3	17.923	8.73	0.668	0.813	1.047	-0.58	-0.3	0.07	113.4	75.7	92.2	118.7	9	65.0732	3
P13688	Carcinoembryonic antigen-related cell adhesion molecule 1 OS=Homo sapiens GN=CEACAM1 PE=1 SV=2	3	7	3	57.525	5.97	1.241	0.945	1.134	0.31	-0.08	0.18	92.6	114.9	87.5	105	1.448	28.069	3
P09564	T-cell antigen CD7 OS=Homo sapiens GN=CD7 PE=1 SV=1	3	18	3	25.393	7.27	0.421	0.53	0.659	-1.25	-0.92	-0.6	153.2	64.6	81.2	101	9	51.7282	3
P01617	Ig kappa chain V-II region TEW OS=Homo sapiens PE=1 SV=1	3	15	3	12.308	6	1.204	1.835	0.949	0.27	0.88	-0.08	80.2	96.6	147.1	76.1	14.849	54.646	3
P14207	Folate receptor beta OS=Homo sapiens GN=FOLR2 PE=1 SV=4	5	11	3	29.26	7.53	1.239	1.535	2.024	0.31	0.62	1.02	69	85.5	105.9	139.6	2.652	36.0208	5
P13284	Gamma-interferon-inducible lysosomal thiol reductase OS=Homo sapiens GN=IFI30 PE=1 SV=3	3	14	3	27.945	4.88	0.947	0.787	0.899	-0.08	-0.35	-0.15	110.1	104.3	86.7	99	6.943	44.7688	3
Q16769	Glutaminyl-peptide cyclotransferase OS=Homo sapiens GN=QPCT PE=1 SV=1	3	13	3	40.851	6.61	1.059	0.609	1.804	0.08	-0.72	0.85	89.5	94.8	54.4	161.3	1.637	32.817	3
Q9HCN6	Platelet glycoprotein VI OS=Homo sapiens GN=GP6 PE=1 SV=4	3	9	3	36.843	9.2	0.87	0.716	1.074	-0.2	-0.48	0.1	109.3	95.1	78.3	117.4	1.738	26.2256	3
P04156	Major prion protein OS=Homo sapiens GN=PRNP PE=1 SV=1	3	26	3	27.643	9	0.653	0.603	0.793	-0.61	-0.73	-0.34	131.2	85.7	79.1	104	5.31	66.31	3
P04080	Cystatin-B OS=Homo sapiens GN=CSTB PE=1 SV=2	3	12	3	11.133	7.56	0.339	0.516	0.638	-1.56	-0.96	-0.65	160.5	54.4	82.8	102.4	9	39.0945	3
P31431	Syndecan-4 OS=Homo sapiens GN=SDC4 PE=1 SV=2	3	13	3	21.628	4.5	0.427	0.449	0.816	-1.23	-1.16	-0.29	148.6	63.4	66.7	121.2	3.642	38.903	3
O75144	ICOS ligand OS=Homo sapiens GN=ICOSLG PE=1 SV=2	3	8	3	33.328	5.31	0.353	0.398	0.779	-1.5	-1.33	-0.36	158.1	55.8	63	123.2	1.683	27.6395	3
P41439	Folate receptor gamma OS=Homo sapiens GN=FOLR3 PE=1 SV=1	5	10	3	27.62	7.83	1.627	3.093	3.39	0.7	1.63	1.76	43.9	71.5	135.8	148.8	1.512	28.9936	5
Q6FHJ7	Secreted frizzled-related protein 4 OS=Homo sapiens GN=SFRP4 PE=1 SV=2	3	8	3	39.8	8.82	1.768	1.48	1.396	0.82	0.57	0.48	70.9	125.3	104.9	98.9	1.154	27.7206	3
Q9BX67	Junctional adhesion molecule C OS=Homo sapiens GN=JAM3 PE=1 SV=1	3	10	3	34.998	7.59	1.442	0.972	0.991	0.53	-0.04	-0.01	90.8	131	88.3	90	0.995	26.4771	3
Q6UY11	Protein delta homolog 2 OS=Homo sapiens GN=DLK2 PE=2 SV=1	3	6	3	40.52	6.54	1.599	0.864	1.001	0.68	-0.21	0	89.6	143.3	77.4	89.7	0.968	23.887	3
Q03405	Urokinase plasminogen activator surface receptor OS=Homo sapiens GN=PLAUR PE=1 SV=1	3	8	3	36.953	6.65	1.054	0.717	0.834	0.08	-0.48	-0.26	111	116.9	79.5	92.6	0.931	26.1126	3
Q6UXB4	C-type lectin domain family 4 member G OS=Homo sapiens GN=CLEC4G PE=1 SV=1	3	16	3	32.541	6.61	0.811	0.854	0.786	-0.3	-0.23	-0.35	115.9	94	98.9	91.1	1.371	31.9285	3
P05060	Secretogranin-1 OS=Homo sapiens GN=CHGB PE=1 SV=2	3	12	3	78.229	5.07	0.764	0.498	0.696	-0.39	-1.01	-0.52	135.2	103.4	67.3	94.1	0.307	36.9874	3
P07358	Complement component C8 beta chain OS=Homo sapiens GN=C8B PE=1 SV=3	3	7	3	67.003	8.13	1.464	3.877	0.866	0.55	1.95	-0.21	55.5	81.3	215.2	48.1	0.562	17.6796	3
P25940	Collagen alpha-3(V) chain OS=Homo sapiens GN=COL5A3 PE=1 SV=3	3	7	3	172.016	6.87	0.403	0.411	0.61	-1.31	-1.28	-0.71	165	66.5	67.8	100.7	0.123	25.1728	3
Q99969	Retinoic acid receptor responder protein 2 OS=Homo sapiens GN=RARRES2 PE=1 SV=1	3	6	3	18.606	9.09	0.513	0.519	0.69	-0.96	-0.95	-0.54	147	75.3	76.3	101.4	2.162	19.7562	3
Q9Y653	G-protein coupled receptor 56 OS=Homo sapiens GN=GPR56 PE=1 SV=2	3	5	3	77.688	8.48	0.496	0.429	0.701	-1.01	-1.22	-0.51	152.3	75.6	65.4	106.8	0.433	15.1398	3
Q9H8J5	MANSC domain-containing protein 1 OS=Homo sapiens GN=MANSC1 PE=2 SV=1	3	7	3	46.781	6.54	1.478	1.715	1.264	0.56	0.78	0.34	73.3	108.4	125.7	92.7	0.995	17.5966	3
Q9Y6Q6	Tumor necrosis factor receptor superfamily member 11A OS=Homo sapiens GN=TNFRSF11A PE=1 SV=1	3	6	3	65.991	5.34	1.554	0.96	0.884	0.64	-0.06	-0.18	91	141.3	87.3	80.4	0.346	26.2123	3
P13473	Lysosome-associated membrane glycoprotein 2 OS=Homo sapiens GN=LAMP2 PE=1 SV=2	3	22	3	44.932	5.63	0.888	0.819	0.888	-0.17	-0.29	-0.17	111.2	98.8	91.1	98.8	0.874	66.7563	3
Q9Y4L1	Hypoxia up-regulated protein 1 OS=Homo sapiens GN=HYOU1 PE=1 SV=1	3	4	3	111.266	5.22	0.569	0.611	1.106	-0.81	-0.71	0.15	121.7	69.3	74.4	134.6	0.166	13.9464	3
P08758	Annexin A5 OS=Homo sapiens GN=ANXA5 PE=1 SV=2	3	4	3	35.914	5.05	0.844	0.971	0.52	-0.24	-0.04	-0.94	119.9	101.3	116.4	62.4	0.425	13.5535	3
Q9Y3B3	Transmembrane emp24 domain-containing protein 7 OS=Homo sapiens GN=TMED7 PE=1 SV=2	3	6	3	25.156	6.89	1.361	1.056	0.884	0.44	0.08	-0.18	93	126.6	98.2	82.2	1.276	19.6831	3
P78423	Fractalkine OS=Homo sapiens GN=CX3CL1 PE=1 SV=1	3	6	3	42.176	6.52	1.019	0.619	0.77	0.03	-0.69	-0.38	117.4	119.6	72.6	90.4	0.616	24.2426	3
Q96DA0	Zymogen granule protein 16 homolog B OS=Homo sapiens GN=ZG16B PE=1 SV=3	3	9	3	22.725	7.39	0.566	0.494	0.627	-0.82	-1.02	-0.67	148.8	84.3	73.6	93.3	1.424	24.1393	3
P08697	Alpha-2-antiplasmin OS=Homo sapiens GN=SERPINF2 PE=1 SV=3	3	12	3	54.531	6.29	0.709	1.125	1.132	-0.5	0.17	0.18	100.9	71.5	113.4	114.2	0.616	34.8193	3
O43291	Kunitz-type protease inhibitor 2 OS=Homo sapiens GN=SPINT2 PE=1 SV=2	3	13	3	28.21	8.29	1.734	0.791	1.096	0.79	-0.34	0.13	86.6	150.1	68.5	94.9	1.031	48.7059	3
P55268	Laminin subunit beta-2 OS=Homo sapiens GN=LAMB2 PE=1 SV=2	3	7	3	195.854	6.52	1.39	1.01	0.957	0.47	0.01	-0.06	91.8	127.6	92.7	87.9	0.111	19.3709	3
Q15223	Poliovirus receptor-related protein 1 OS=Homo sapiens GN=PVRL1 PE=1 SV=3	3	5	3	57.122	6.1	0.293	0.309	0.715	-1.77	-1.69	-0.48	172.6	50.6	53.3	123.4	0.557	20.0332	3
Q13822	Ectonucleotide pyrophosphatase/phosphodiesterase family member 2 OS=Homo sapiens GN=ENPP2 PE=1 SV=3	3	5	3	98.93	7.37	1.183	1.044	1.357	0.24	0.06	0.44	87.3	103.3	91.1	118.4	0.284	13.8199	3
Q08629	Testican-1 OS=Homo sapiens GN=SPOCK1 PE=1 SV=1	3	5	3	49.092	6.1	0.726	0.725	0.991	-0.46	-0.46	-0.01	116.2	84.4	84.2	115.2	0.445	17.2328	3
Q9BRT3	Migration and invasion enhancer 1 OS=Homo sapiens GN=MIEN1 PE=1 SV=1	3	9	3	12.395	4.37	0.775	0.719	0.846	-0.37	-0.48	-0.24	119.8	92.8	86.1	101.3	2.162	28.7631	3
P99999	Cytochrome c OS=Homo sapiens GN=CYCS PE=1 SV=2	3	8	3	11.741	9.57	0.633	0.553	0.727	-0.66	-0.86	-0.46	137.3	86.9	75.9	99.8	3.217	22.653	3
Q16849	Receptor-type tyrosine-protein phosphatase-like N OS=Homo sapiens GN=PTPRN PE=1 SV=1	3	6	3	105.781	7.11	0.744	0.667	0.837	-0.43	-0.59	-0.26	123.2	91.6	82.1	103.1	0.227	20.5213	3
P20138	Myeloid cell surface antigen CD33 OS=Homo sapiens GN=CD33 PE=1 SV=2	3	4	3	39.8	8.38	0.566	0.481	0.689	-0.82	-1.06	-0.54	146.2	82.8	70.3	100.7	0.719	13.7642	3
Q96JQ0	Protocadherin-16 OS=Homo sapiens GN=DCHS1 PE=2 SV=1	3	5	3	345.971	4.94	0.862	0.81	0.767	-0.21	-0.3	-0.38	116.3	100.2	94.2	89.2	0.087	17.1208	3
O95967	EGF-containing fibulin-like extracellular matrix protein 2 OS=Homo sapiens GN=EFEMP2 PE=1 SV=3	3	4	3	49.372	4.94	1.168	1.232	1.115	0.22	0.3	0.16	88.6	103.5	109.1	98.8	0.492	12.0674	3
Q13443	Disintegrin and metalloproteinase domain-containing protein 9 OS=Homo sapiens GN=ADAM9 PE=1 SV=1	3	4	3	90.497	7.52	0.295	0.35	0.592	-1.76	-1.52	-0.76	178.9	52.7	62.5	105.9	0.202	15.2075	3
P26992	Ciliary neurotrophic factor receptor subunit alpha OS=Homo sapiens GN=CNTFR PE=1 SV=2	3	7	3	40.607	6.76	0.818	0.875	0.988	-0.29	-0.19	-0.02	108.7	88.9	95.1	107.4	1.154	17.6103	3
Q9NNX6	CD209 antigen OS=Homo sapiens GN=CD209 PE=1 SV=1	3	6	3	45.746	5.47	1.35	1.637	1.287	0.43	0.71	0.36	75.8	102.4	124.2	97.6	0.425	22.2828	3
Q07654	Trefoil factor 3 OS=Homo sapiens GN=TFF3 PE=1 SV=1	3	11	3	8.635	5.92	2.33	2.438	0.988	1.22	1.29	-0.02	59.2	138	144.3	58.5	16.783	30.9384	3
P11362	Fibroblast growth factor receptor 1 OS=Homo sapiens GN=FGFR1 PE=1 SV=3	4	6	3	91.809	6.21	0.693	0.737	0.84	-0.53	-0.44	-0.25	122.3	84.7	90.2	102.8	0.354	19.0459	4
P81605	Dermcidin OS=Homo sapiens GN=DCD PE=1 SV=2	3	4	3	11.277	6.54	0.903	0.894	1.121	-0.15	-0.16	0.16	102.1	92.2	91.2	114.5	1.783	13.2438	3
Q86SQ4	G-protein coupled receptor 126 OS=Homo sapiens GN=GPR126 PE=1 SV=3	3	7	3	136.607	7.87	1.067	1.08	0.8	0.09	0.11	-0.32	101.4	108.2	109.4	81	0.228	11.4423	3
Q8N307	Mucin-20 OS=Homo sapiens GN=MUC20 PE=1 SV=3	3	4	3	71.938	5.07	0.758	0.664	0.992	-0.4	-0.59	-0.01	117.2	88.8	77.8	116.2	0.346	13.2238	3
Q6P4A8	Phospholipase B-like 1 OS=Homo sapiens GN=PLBD1 PE=1 SV=2	3	4	3	63.214	9.06	2.285	0.539	0.701	1.19	-0.89	-0.51	88.4	202	47.7	61.9	0.445	13.7574	3
P35579	Myosin-9 OS=Homo sapiens GN=MYH9 PE=1 SV=4	3	4	3	226.392	5.6	1.756	1.035	1.005	0.81	0.05	0.01	83.4	146.4	86.4	83.8	0.074	14.0459	3
O00592	Podocalyxin OS=Homo sapiens GN=PODXL PE=1 SV=2	3	5	3	58.599	5.49	0.304	0.388	1.35	-1.72	-1.37	0.43	131.5	39.9	51	177.5	0.468	16.6271	3
Q96HD1	Cysteine-rich with EGF-like domain protein 1 OS=Homo sapiens GN=CRELD1 PE=1 SV=3	3	4	3	45.409	4.87	1.156	1.151	1.314	0.21	0.2	0.39	86.6	100	99.7	113.7	0.492	12.4484	3
Q9NS68	Tumor necrosis factor receptor superfamily member 19 OS=Homo sapiens GN=TNFRSF19 PE=1 SV=1	3	4	3	45.985	5.47	1.688	1.301	1.289	0.76	0.38	0.37	75.8	127.9	98.6	97.7	0.668	11.9463	3
P08670	Vimentin OS=Homo sapiens GN=VIM PE=1 SV=4	3	3	3	53.619	5.12	0.548	0.412	0.421	-0.87	-1.28	-1.25	168	92.1	69.2	70.8	0.225	12.2175	3
P18510	Interleukin-1 receptor antagonist protein OS=Homo sapiens GN=IL1RN PE=1 SV=1	3	3	3	20.042	6.19	0.556	0.558	0.651	-0.85	-0.84	-0.62	144.6	80.4	80.8	94.2	1.154	10.9218	3
Q9UM22	Mammalian ependymin-related protein 1 OS=Homo sapiens GN=EPDR1 PE=1 SV=2	3	8	3	25.421	6.6	1.188	1.123	0.976	0.25	0.17	-0.04	93.3	110.9	104.8	91	1.61	19.9253	3
P29622	Kallistatin OS=Homo sapiens GN=SERPINA4 PE=1 SV=3	3	3	3	48.511	7.75	0.717	0.904	0.794	-0.48	-0.15	-0.33	117.1	84	105.9	93	0.318	11.0232	3
Q12864	Cadherin-17 OS=Homo sapiens GN=CDH17 PE=1 SV=3	3	5	3	92.162	5.14	0.859	0.946	0.918	-0.22	-0.08	-0.12	107.5	92.3	101.7	98.6	0.174	20.6282	3
P31944	Caspase-14 OS=Homo sapiens GN=CASP14 PE=1 SV=2	3	4	3	27.662	5.58	1.052	0.655	1.122	0.07	-0.61	0.17	104.5	109.9	68.5	117.2	0.668	10.337	3
P15309	Prostatic acid phosphatase OS=Homo sapiens GN=ACPP PE=1 SV=3	3	3	3	44.537	6.24	0.857	1.106	1.59	-0.22	0.15	0.67	87.8	75.3	97.2	139.7	0.413	10.0107	3
O75369	Filamin-B OS=Homo sapiens GN=FLNB PE=1 SV=2	3	4	3	277.99	5.73	0.954	0.678	0.782	-0.07	-0.56	-0.35	117.2	111.8	79.4	91.6	0.061	13.1478	3
Q8TDQ1	CMRF35-like molecule 1 OS=Homo sapiens GN=CD300LF PE=1 SV=3	3	5	3	32.314	5.67	0.784	0.682	1.59	-0.35	-0.55	0.67	98.6	77.3	67.3	156.8	1.154	12.5372	3
P15529	Membrane cofactor protein OS=Homo sapiens GN=CD46 PE=1 SV=3	3	6	3	43.719	6.74	1.453	1.532	1.029	0.54	0.62	0.04	79.8	115.9	122.2	82.1	0.778	14.9278	3
Q5IJ48	Crumbs homolog 2 OS=Homo sapiens GN=CRB2 PE=1 SV=2	3	3	3	134.176	5.55	0.757	0.787	0.874	-0.4	-0.35	-0.19	117.1	88.6	92.1	102.3	0.136	10.1159	3
P55000	Secreted Ly-6/uPAR-related protein 1 OS=Homo sapiens GN=SLURP1 PE=1 SV=2	3	11	3	11.178	5.33	1.399	1.863	1.357	0.48	0.9	0.44	71.2	99.6	132.6	96.6	2.981	34.1966	3
Q9HB40	Retinoid-inducible serine carboxypeptidase OS=Homo sapiens GN=SCPEP1 PE=1 SV=1	3	4	3	50.798	5.81	0.865	0.509	0.596	-0.21	-0.97	-0.75	134.7	116.5	68.5	80.2	0.492	12.8814	3
Q9H0W9	Ester hydrolase C11orf54 OS=Homo sapiens GN=C11orf54 PE=1 SV=1	3	7	3	35.095	6.7	0.488	0.373	1.062	-1.03	-1.42	0.09	136.8	66.8	51	145.4	0.848	21.8419	3
Q96C19	EF-hand domain-containing protein D2 OS=Homo sapiens GN=EFHD2 PE=1 SV=1	3	4	3	26.68	5.2	1.731	0.729	0.744	0.79	-0.46	-0.43	95.2	164.7	69.4	70.8	0.719	10.8883	3
Q9HAV5	Tumor necrosis factor receptor superfamily member 27 OS=Homo sapiens GN=EDA2R PE=1 SV=2	3	4	3	32.737	5	1.469	1.648	1.076	0.55	0.72	0.11	77	113.1	127	82.9	1.154	11.653	3
Q9NPF0	CD320 antigen OS=Homo sapiens GN=CD320 PE=1 SV=1	3	5	3	28.972	4.75	1.45	0.93	1.083	0.54	-0.1	0.11	89.6	130	83.4	97	0.874	17.5246	3
O43493	Trans-Golgi network integral membrane protein 2 OS=Homo sapiens GN=TGOLN2 PE=1 SV=2	3	4	3	51.082	5.73	0.843	0.587	0.702	-0.25	-0.77	-0.51	127.7	107.6	75	89.7	0.359	12.9314	3
P00995	Pancreatic secretory trypsin inhibitor OS=Homo sapiens GN=SPINK1 PE=1 SV=2	3	6	3	8.501	7.61	1.081	0.959	0.642	0.11	-0.06	-0.64	108.6	117.4	104.2	69.8	4.623	17.4662	3
P27482	Calmodulin-like protein 3 OS=Homo sapiens GN=CALML3 PE=1 SV=2	3	3	3	16.88	4.42	0.281	0.249	0.726	-1.83	-2.01	-0.46	177.3	49.8	44.2	128.7	0.874	10.293	3
P01130	Low-density lipoprotein receptor OS=Homo sapiens GN=LDLR PE=1 SV=1	3	9	3	95.314	5.05	1.154	0.913	1.073	0.21	-0.13	0.1	96.6	111.5	88.2	103.7	0.212	22.8678	3
P16444	Dipeptidase 1 OS=Homo sapiens GN=DPEP1 PE=1 SV=3	3	3	3	45.645	6.15	0.411	0.409	0.992	-1.28	-1.29	-0.01	142.2	58.4	58.2	141.1	0.334	10.2635	3
P80748	Ig lambda chain V-III region LOI OS=Homo sapiens PE=1 SV=1	3	10	3	11.928	5.08	0.777	1.514	0.968	-0.36	0.6	-0.05	93.9	73	142.2	90.9	3.642	26.4445	3
O75339	Cartilage intermediate layer protein 1 OS=Homo sapiens GN=CILP PE=1 SV=4	3	3	3	132.48	8.41	1.16	0.884	0.876	0.21	-0.18	-0.19	102.1	118.3	90.2	89.4	0.112	9.47273	3
P08473	Neprilysin OS=Homo sapiens GN=MME PE=1 SV=2	3	4	3	85.46	5.73	0.606	1.021	1.194	-0.72	0.03	0.26	104.7	63.4	106.9	125	0.227	9.89471	3
Q9NZZ3	Charged multivesicular body protein 5 OS=Homo sapiens GN=CHMP5 PE=1 SV=1	3	3	3	24.555	4.83	0.572	0.812	0.741	-0.81	-0.3	-0.43	128	73.3	103.9	94.9	1.371	8.51123	3
Q9GZM7	Tubulointerstitial nephritis antigen-like OS=Homo sapiens GN=TINAGL1 PE=1 SV=1	3	4	3	52.353	6.99	0.847	0.815	0.849	-0.24	-0.3	-0.24	113.9	96.5	92.8	96.7	0.334	11.1234	3
P16401	Histone H1.5 OS=Homo sapiens GN=HIST1H1B PE=1 SV=3	3	3	3	22.566	10.92	0.346	0.363	0.361	-1.53	-1.46	-1.47	193.2	66.9	70.1	69.8	0.701	9.6435	3
Q96PX8	SLIT and NTRK-like protein 1 OS=Homo sapiens GN=SLITRK1 PE=1 SV=2	3	3	3	77.686	6.44	0.748	0.72	0.979	-0.42	-0.47	-0.03	116	86.8	83.6	113.6	0.199	9.57708	3
Q92876	Kallikrein-6 OS=Homo sapiens GN=KLK6 PE=1 SV=1	3	3	3	26.838	7.44	1.021	1.388	0.833	0.03	0.47	-0.26	94.3	96.3	130.9	78.5	0.585	9.96007	3
P31949	Protein S100-A11 OS=Homo sapiens GN=S100A11 PE=1 SV=2	3	6	3	11.733	7.12	1.225	0.787	0.814	0.29	-0.35	-0.3	104.5	128	82.3	85.1	1.683	19.4035	3
P09923	Intestinal-type alkaline phosphatase OS=Homo sapiens GN=ALPI PE=1 SV=2	3	3	3	56.776	5.86	1.015	0.798	1.977	0.02	-0.32	0.98	83.5	84.8	66.7	165.1	0.318	9.61142	3
O14745	Na(+)/H(+) exchange regulatory cofactor NHE-RF1 OS=Homo sapiens GN=SLC9A3R1 PE=1 SV=4	3	3	3	38.845	5.77	0.627	0.481	0.861	-0.67	-1.06	-0.22	134.7	84.5	64.8	116	0.292	10.1594	3
P20061	Transcobalamin-1 OS=Homo sapiens GN=TCN1 PE=1 SV=2	3	3	3	48.176	5.03	1.439	1.064	1.101	0.53	0.09	0.14	86.9	125	92.4	95.6	0.468	10.6222	3
Q09666	Neuroblast differentiation-associated protein AHNAK OS=Homo sapiens GN=AHNAK PE=1 SV=2	3	4	3	628.699	6.15	0.843	0.748	0.78	-0.25	-0.42	-0.36	118.7	100.1	88.7	92.5	0.011	3.518	3
P03952	Plasma kallikrein OS=Homo sapiens GN=KLKB1 PE=1 SV=1	3	3	3	71.323	8.22	1.535	1.672	0.789	0.62	0.74	-0.34	80.1	122.9	133.9	63.2	0.17	9.03841	3
O75503	Ceroid-lipofuscinosis neuronal protein 5 OS=Homo sapiens GN=CLN5 PE=1 SV=2	3	3	3	41.47	7.4	0.323	0.586	0.622	-1.63	-0.77	-0.68	158	51	92.7	98.3	0.369	8.88256	3
P22897	Macrophage mannose receptor 1 OS=Homo sapiens GN=MRC1 PE=1 SV=1	3	3	3	165.905	6.54	0.918	1.899	1.093	-0.12	0.93	0.13	81.5	74.8	154.7	89	0.087	8.14961	3
P19021	Peptidyl-glycine alpha-amidating monooxygenase OS=Homo sapiens GN=PAM PE=1 SV=2	3	8	3	108.263	6.42	0.6	0.478	1.162	-0.74	-1.07	0.22	123.5	74.1	59	143.5	0.136	21.1905	3
Q8WWZ8	Oncoprotein-induced transcript 3 protein OS=Homo sapiens GN=OIT3 PE=1 SV=2	3	4	3	59.983	5.58	0.433	0.487	0.737	-1.21	-1.04	-0.44	150.5	65.2	73.3	111	0.269	8.22589	3
P41217	OX-2 membrane glycoprotein OS=Homo sapiens GN=CD200 PE=1 SV=4	3	3	3	31.244	8.51	0.515	0.689	0.74	-0.96	-0.54	-0.43	135.9	70	93.6	100.5	0.874	8.99771	3
P16109	P-selectin OS=Homo sapiens GN=SELP PE=1 SV=3	3	5	3	90.773	6.6	1.097	0.922	1.166	0.13	-0.12	0.22	95.6	104.9	88.1	111.4	0.212	8.75418	3
O96009	Napsin-A OS=Homo sapiens GN=NAPSA PE=1 SV=1	3	3	3	45.358	6.61	0.748	0.958	1.118	-0.42	-0.06	0.16	104.6	78.3	100.2	116.9	0.501	8.69485	3
Q9NZ53	Podocalyxin-like protein 2 OS=Homo sapiens GN=PODXL2 PE=1 SV=1	3	3	3	65.036	4.34	0.198	0.22	0.566	-2.33	-2.19	-0.82	201.6	40	44.3	114.1	0.438	9.08928	3
Q9Y5Z4	Heme-binding protein 2 OS=Homo sapiens GN=HEBP2 PE=1 SV=1	3	3	3	22.861	4.63	0.672	0.591	0.738	-0.57	-0.76	-0.44	133.3	89.6	78.7	98.4	0.995	8.29455	3
P15924	Desmoplakin OS=Homo sapiens GN=DSP PE=1 SV=3	3	3	3	331.569	6.81	0.836	0.907	1.19	-0.26	-0.14	0.25	101.7	85	92.2	121	0.034	9.76021	3
P02775	Platelet basic protein OS=Homo sapiens GN=PPBP PE=1 SV=3	3	3	3	13.885	8.79	0.767	0.681	0.47	-0.38	-0.55	-1.09	137.1	105.1	93.4	64.4	1.683	8.90663	3
O15394	Neural cell adhesion molecule 2 OS=Homo sapiens GN=NCAM2 PE=1 SV=2	3	3	3	92.988	5.6	0.83	0.889	0.912	-0.27	-0.17	-0.13	110.1	91.4	98	100.4	0.129	9.5977	3
Q01151	CD83 antigen OS=Homo sapiens GN=CD83 PE=1 SV=1	3	3	3	23.027	8.18	1.46	1.086	0.983	0.55	0.12	-0.02	88.3	128.9	95.9	86.8	0.701	9.22963	3
Q9UNW1	Multiple inositol polyphosphate phosphatase 1 OS=Homo sapiens GN=MINPP1 PE=1 SV=1	3	4	3	55.016	7.81	0.91	1.024	0.959	-0.14	0.03	-0.06	102.7	93.5	105.2	98.6	0.28	8.16874	3
Q92673	Sortilin-related receptor OS=Homo sapiens GN=SORL1 PE=1 SV=2	3	3	3	248.267	5.55	1.386	1.28	0.897	0.47	0.36	-0.16	87.7	121.5	112.2	78.6	0.052	7.82223	3
P27169	Serum paraoxonase/arylesterase 1 OS=Homo sapiens GN=PON1 PE=1 SV=3	3	3	3	39.706	5.22	1.04	1.339	1.125	0.06	0.42	0.17	88.8	92.4	118.9	99.9	0.413	7.52385	3
Q86UN3	Reticulon-4 receptor-like 2 OS=Homo sapiens GN=RTN4RL2 PE=1 SV=1	3	3	3	46.077	7.62	0.926	0.934	1.307	-0.11	-0.1	0.39	96	88.9	89.7	125.4	0.369	7.34029	3
P09382	Galectin-1 OS=Homo sapiens GN=LGALS1 PE=1 SV=2	3	3	3	14.706	5.5	0.448	0.55	0.794	-1.16	-0.86	-0.33	143.3	64.2	78.8	113.8	1.154	8.32835	3
P21709	Ephrin type-A receptor 1 OS=Homo sapiens GN=EPHA1 PE=1 SV=4	3	3	3	108.058	6.64	0.726	0.835	0.823	-0.46	-0.26	-0.28	118.2	85.8	98.7	97.3	0.139	5.53436	3
P20827	Ephrin-A1 OS=Homo sapiens GN=EFNA1 PE=1 SV=2	3	4	3	23.772	6.83	0.925	0.662	0.716	-0.11	-0.59	-0.48	121.1	112	80.2	86.7	0.995	12.1442	3
P07305	Histone H1.0 OS=Homo sapiens GN=H1F0 PE=1 SV=3	3	3	3	20.85	10.84	0.606	0.434	0.423	-0.72	-1.21	-1.24	162.5	98.4	70.4	68.7	1.371	7.66273	3
O43707	Alpha-actinin-4 OS=Homo sapiens GN=ACTN4 PE=1 SV=2	3	3	3	104.788	5.44	0.891	0.447	0.596	-0.17	-1.16	-0.75	136.3	121.4	60.9	81.3	0.116	7.74768	3
P31948	Stress-induced-phosphoprotein 1 OS=Homo sapiens GN=STIP1 PE=1 SV=1	3	3	3	62.599	6.8	0.763	0.834	0.754	-0.39	-0.26	-0.41	119.4	91.1	99.6	90	0.17	8.95919	3
Q9UBX1	Cathepsin F OS=Homo sapiens GN=CTSF PE=1 SV=1	3	4	3	53.332	8.22	0.592	0.661	0.994	-0.76	-0.6	-0.01	123.2	73	81.4	122.4	0.269	10.3451	3
Q99574	Neuroserpin OS=Homo sapiens GN=SERPINI1 PE=1 SV=1	3	3	3	46.397	4.91	1.469	0.924	1.232	0.55	-0.11	0.3	86.5	127	79.9	106.6	0.334	8.60846	3
O00462	Beta-mannosidase OS=Homo sapiens GN=MANBA PE=1 SV=3	3	3	3	100.831	5.52	1.025	1.076	1.156	0.04	0.11	0.21	94	96.3	101.1	108.7	0.17	6.96028	3
P78552	Interleukin-13 receptor subunit alpha-1 OS=Homo sapiens GN=IL13RA1 PE=1 SV=1	3	3	3	48.728	6.01	0.872	0.88	0.855	-0.2	-0.18	-0.23	110.9	96.7	97.6	94.8	0.35	7.25121	3
P49908	Selenoprotein P OS=Homo sapiens GN=SEPP1 PE=1 SV=3	3	3	3	43.156	7.87	1.144	1.846	1.367	0.19	0.88	0.45	74.7	85.5	137.8	102.1	0.369	7.83615	3
O95445	Apolipoprotein M OS=Homo sapiens GN=APOM PE=1 SV=2	3	3	3	21.239	6.01	0.628	0.719	1.132	-0.67	-0.48	0.18	115	72.3	82.6	130.1	0.701	8.28976	3
P46940	Ras GTPase-activating-like protein IQGAP1 OS=Homo sapiens GN=IQGAP1 PE=1 SV=1	3	3	3	189.134	6.48	1.69	1.056	0.93	0.76	0.08	-0.11	85.5	144.6	90.4	79.5	0.075	8.89941	3
P51858	Hepatoma-derived growth factor OS=Homo sapiens GN=HDGF PE=1 SV=1	3	3	3	26.772	4.73	0.586	0.471	0.595	-0.77	-1.09	-0.75	150.9	88.4	71.1	89.7	0.501	8.09735	3
P04746	Pancreatic alpha-amylase OS=Homo sapiens GN=AMY2A PE=1 SV=2	19	247	2	57.67	7.05	0.746	0.361	0.704	-0.42	-1.47	-0.51	142.3	106.2	51.4	100.1	147.735	584.829	19
P04745	Alpha-amylase 1 OS=Homo sapiens GN=AMY1A PE=1 SV=2	18	183	2	57.731	6.93	0.796	0.59	0.734	-0.33	-0.76	-0.45	128.2	102.1	75.6	94.1	67.129	450.956	18
P78324	Tyrosine-protein phosphatase non-receptor type substrate 1 OS=Homo sapiens GN=SIRPA PE=1 SV=2	13	78	2	54.933	6.98	1.214	0.897	1.136	0.28	-0.16	0.18	94.2	114.3	84.5	107	5.404	261.985	13
P0CG05	Ig lambda-2 chain C regions OS=Homo sapiens GN=IGLC2 PE=1 SV=1	5	87	2	11.287	7.24	0.981	1.525	0.872	-0.03	0.61	-0.2	91.4	89.6	139.3	79.7	137.95	342.184	5
P01860	Ig gamma-3 chain C region OS=Homo sapiens GN=IGHG3 PE=1 SV=2	8	86	2	41.26	7.9	1.146	1.763	0.814	0.2	0.82	-0.3	84.7	97.1	149.3	69	5.813	274.129	8
P02533	Keratin, type I cytoskeletal 14 OS=Homo sapiens GN=KRT14 PE=1 SV=4	12	25	2	51.529	5.16	1.456	2.31	0.868	0.54	1.21	-0.2	71	103.4	164	61.6	1.683	83.5593	12
O75594	Peptidoglycan recognition protein 1 OS=Homo sapiens GN=PGLYRP1 PE=1 SV=1	2	22	2	21.717	8.59	0.355	0.282	0.75	-1.5	-1.82	-0.42	167.6	59.4	47.3	125.6	4.337	77.9457	2
Q03591	Complement factor H-related protein 1 OS=Homo sapiens GN=CFHR1 PE=1 SV=2	6	23	2	37.626	7.39	0.729	1.627	0.867	-0.46	0.7	-0.21	94.7	69.1	154.1	82.1	2.594	72.535	6
Q8WVN6	Secreted and transmembrane protein 1 OS=Homo sapiens GN=SECTM1 PE=1 SV=2	2	21	2	27.022	7.43	0.503	0.576	0.654	-0.99	-0.79	-0.61	146.3	73.7	84.3	95.7	9	87.8092	2
P08637	Low affinity immunoglobulin gamma Fc region receptor III-A OS=Homo sapiens GN=FCGR3A PE=1 SV=2	5	28	2	29.071	8.07	0.164	0.17	0.63	-2.61	-2.55	-0.67	203.7	33.3	34.7	128.3	3.642	83.5173	5
P30047	GTP cyclohydrolase 1 feedback regulatory protein OS=Homo sapiens GN=GCHFR PE=1 SV=3	2	22	2	9.692	6.54	1.067	0.748	0.989	0.09	-0.42	-0.02	105.1	112.2	78.7	104	176.828	35.5523	2
P01598	Ig kappa chain V-I region EU OS=Homo sapiens PE=1 SV=1	2	8	2	11.781	8.44	1.003	1.333	0.733	0	0.41	-0.45	98.3	98.6	131	72.1	9	28.0486	2
P80370	Protein delta homolog 1 OS=Homo sapiens GN=DLK1 PE=1 SV=3	2	16	2	41.272	5.67	2.587	1.471	1.979	1.37	0.56	0.99	56.8	147	83.6	112.5	0.896	52.6674	2
Q15848	Adiponectin OS=Homo sapiens GN=ADIPOQ PE=1 SV=1	2	17	2	26.397	5.74	1.406	1.624	0.99	0.49	0.7	-0.01	79.7	112.1	129.4	78.9	2.162	31.7162	2
Q16651	Prostasin OS=Homo sapiens GN=PRSS8 PE=1 SV=1	2	8	2	36.408	5.85	0.964	0.894	0.774	-0.05	-0.16	-0.37	110.1	106.2	98.4	85.3	3.642	26.4479	2
P20333	Tumor necrosis factor receptor superfamily member 1B OS=Homo sapiens GN=TNFRSF1B PE=1 SV=3	2	11	2	48.26	6.28	2.005	1.395	1.929	1	0.48	0.95	63.2	126.7	88.2	121.9	1.512	40.6141	2
P40199	Carcinoembryonic antigen-related cell adhesion molecule 6 OS=Homo sapiens GN=CEACAM6 PE=1 SV=3	3	5	2	37.172	5.82	0.904	0.784	0.793	-0.15	-0.35	-0.33	114.9	103.9	90.1	91.1	1.276	19.1206	3
Q9BZG9	Ly-6/neurotoxin-like protein 1 OS=Homo sapiens GN=LYNX1 PE=1 SV=3	2	26	2	14.016	6.71	0.717	0.504	1.363	-0.48	-0.99	0.45	111.6	80	56.3	152.1	5.813	80.7465	2
Q01974	Tyrosine-protein kinase transmembrane receptor ROR2 OS=Homo sapiens GN=ROR2 PE=1 SV=2	3	11	2	104.69	6.55	1.241	1.046	0.948	0.31	0.06	-0.08	94.5	117.2	98.8	89.6	0.442	28.6744	3
P04155	Trefoil factor 1 OS=Homo sapiens GN=TFF1 PE=1 SV=1	2	19	2	9.143	4.35	1.654	1.524	2.186	0.73	0.61	1.13	62.9	104	95.8	137.4	14.849	48.0735	2
P35321	Cornifin-A OS=Homo sapiens GN=SPRR1A PE=1 SV=2	4	12	2	9.871	8.48	0.898	0.975	1.727	-0.15	-0.04	0.79	87	78.1	84.7	150.2	9	34.4771	4
P36896	Activin receptor type-1B OS=Homo sapiens GN=ACVR1B PE=1 SV=1	2	11	2	56.77	7.03	1.36	1.027	1.122	0.44	0.04	0.17	88.7	120.7	91.1	99.5	0.701	34.0679	2
Q5ZPR3	CD276 antigen OS=Homo sapiens GN=CD276 PE=1 SV=1	2	7	2	57.199	4.91	1.055	0.69	0.864	0.08	-0.54	-0.21	110.8	116.9	76.5	95.8	0.624	29.6247	2
P61769	Beta-2-microglobulin OS=Homo sapiens GN=B2M PE=1 SV=1	2	18	2	13.706	6.52	0.324	0.751	0.731	-1.63	-0.41	-0.45	142.5	46.2	107	104.3	4.623	54.4104	2
P01765	Ig heavy chain V-III region TIL OS=Homo sapiens PE=1 SV=1	2	8	2	12.348	9.13	0.9	1.157	0.656	-0.15	0.21	-0.61	107.7	97	124.6	70.7	9	24.9167	2
Q9UNN8	Endothelial protein C receptor OS=Homo sapiens GN=PROCR PE=1 SV=1	2	17	2	26.655	7.18	0.52	0.556	0.528	-0.94	-0.85	-0.92	153.6	79.9	85.4	81.1	1.031	51.0189	2
Q8TCZ2	CD99 antigen-like protein 2 OS=Homo sapiens GN=CD99L2 PE=2 SV=1	2	8	2	27.969	5.14	0.493	0.476	1.011	-1.02	-1.07	0.02	134.2	66.2	63.9	135.7	1.154	26.2805	2
P09228	Cystatin-SA OS=Homo sapiens GN=CST2 PE=1 SV=1	3	8	2	16.434	4.93	1.395	1.028	2.083	0.48	0.04	1.06	72.6	101.3	74.7	151.3	4.623	26.4484	3
P04003	C4b-binding protein alpha chain OS=Homo sapiens GN=C4BPA PE=1 SV=2	2	9	2	66.989	7.3	1.287	1.194	1.073	0.36	0.26	0.1	87.8	113	104.9	94.2	0.438	23.8557	2
P12259	Coagulation factor V OS=Homo sapiens GN=F5 PE=1 SV=4	2	12	2	251.546	6.05	0.528	0.443	1.297	-0.92	-1.17	0.38	122.4	64.6	54.3	158.7	0.122	38.5816	2
Q8N3J6	Cell adhesion molecule 2 OS=Homo sapiens GN=CADM2 PE=2 SV=1	2	6	2	47.524	5.33	0.993	0.655	0.954	-0.01	-0.61	-0.07	111	110.3	72.7	105.9	0.896	16.7113	2
O00622	Protein CYR61 OS=Homo sapiens GN=CYR61 PE=1 SV=1	2	4	2	41.998	8.21	1.561	1.088	1.131	0.64	0.12	0.18	83.7	130.6	91.1	94.6	0.389	13.692	2
Q9BXN2	C-type lectin domain family 7 member A OS=Homo sapiens GN=CLEC7A PE=1 SV=1	2	5	2	27.61	5.36	1.007	1.05	0.772	0.01	0.07	-0.37	104.4	105.2	109.7	80.6	1.154	18.0044	2
Q9GZM5	Protein YIPF3 OS=Homo sapiens GN=YIPF3 PE=1 SV=1	2	39	2	38.223	5.76	0.792	0.741	1.312	-0.34	-0.43	0.39	104	82.4	77.1	136.5	1.054	98.6911	2
P01613	Ig kappa chain V-I region Ni OS=Homo sapiens PE=1 SV=1	2	8	2	12.238	5.36	0.931	1.235	0.885	-0.1	0.3	-0.18	98.7	91.9	121.9	87.4	9	26.3688	2
Q13477	Mucosal addressin cell adhesion molecule 1 OS=Homo sapiens GN=MADCAM1 PE=1 SV=2	2	4	2	40.13	5.12	0.546	0.532	0.814	-0.87	-0.91	-0.3	138.3	75.6	73.6	112.6	0.54	15.7658	2
O14773	Tripeptidyl-peptidase 1 OS=Homo sapiens GN=TPP1 PE=1 SV=2	2	8	2	61.21	6.48	0.99	1.057	1.056	-0.02	0.08	0.08	97.5	96.5	103.1	103	0.425	21.019	2
O95460	Matrilin-4 OS=Homo sapiens GN=MATN4 PE=1 SV=3	2	4	2	68.443	6.1	1.718	0.916	0.923	0.78	-0.13	-0.12	87.8	150.8	80.4	81	0.266	13.1376	2
Q8WWA0	Intelectin-1 OS=Homo sapiens GN=ITLN1 PE=1 SV=1	2	4	2	34.939	6.01	0.775	0.59	0.662	-0.37	-0.76	-0.6	132.1	102.4	78	87.5	0.585	14.7168	2
Q14126	Desmoglein-2 OS=Homo sapiens GN=DSG2 PE=1 SV=2	2	5	2	122.218	5.24	0.641	0.684	0.81	-0.64	-0.55	-0.3	127.6	81.8	87.3	103.3	0.172	11.7387	2
P01623	Ig kappa chain V-III region WOL OS=Homo sapiens PE=1 SV=1	2	10	2	11.739	8.91	1.054	1.424	0.996	0.08	0.51	-0.01	89.4	94.2	127.3	89.1	2.162	33.0795	2
Q8WU39	Plasma cell-induced resident endoplasmic reticulum protein OS=Homo sapiens GN=PACAP PE=1 SV=1	2	5	2	20.681	5.57	0.694	1.004	0.717	-0.53	0.01	-0.48	117.1	81.3	117.6	84	1.512	13.0619	2
Q2UY09	Collagen alpha-1(XXVIII) chain OS=Homo sapiens GN=COL28A1 PE=2 SV=2	2	6	2	116.585	6.4	1.522	1.012	0.987	0.61	0.02	-0.02	88.5	134.7	89.5	87.3	0.131	20.7991	2
Q8IWU5	Extracellular sulfatase Sulf-2 OS=Homo sapiens GN=SULF2 PE=1 SV=1	2	9	2	100.39	9.17	0.691	0.529	0.614	-0.53	-0.92	-0.7	141.2	97.5	74.7	86.6	0.184	34.4588	2
P29400	Collagen alpha-5(IV) chain OS=Homo sapiens GN=COL4A5 PE=1 SV=2	2	3	2	160.943	7.62	0.507	0.532	0.798	-0.98	-0.91	-0.33	141	71.5	75.1	112.5	0.062	13.6633	2
Q6ZWJ8	Kielin/chordin-like protein OS=Homo sapiens GN=KCP PE=2 SV=2	2	3	2	159.828	5.74	2.191	2.107	0.941	1.13	1.08	-0.09	64.1	140.5	135.1	60.3	0.118	11.7783	2
Q9UP38	Frizzled-1 OS=Homo sapiens GN=FZD1 PE=1 SV=2	3	7	2	71.112	7.99	1.235	1.422	1.62	0.3	0.51	0.7	75.8	93.6	107.8	122.8	0.45	20.8541	3
Q9UKY0	Prion-like protein doppel OS=Homo sapiens GN=PRND PE=1 SV=2	2	5	2	20.28	9.03	0.227	0.194	0.869	-2.14	-2.36	-0.2	174.6	39.6	34	151.8	1.783	15.5149	2
Q14118	Dystroglycan OS=Homo sapiens GN=DAG1 PE=1 SV=2	2	3	2	97.381	8.56	0.403	0.352	0.651	-1.31	-1.51	-0.62	166.3	67	58.5	108.2	0.148	12.8828	2
P13640	Metallothionein-1G OS=Homo sapiens GN=MT1G PE=1 SV=2	2	6	2	6.136	7.96	1.155	0.348	1.444	0.21	-1.52	0.53	101.3	117	35.3	146.3	9	19.2291	2
P28827	Receptor-type tyrosine-protein phosphatase mu OS=Homo sapiens GN=PTPRM PE=1 SV=2	2	3	2	163.578	6.65	0.541	0.667	0.685	-0.89	-0.59	-0.55	138.3	74.8	92.2	94.7	0.094	13.8653	2
P35754	Glutaredoxin-1 OS=Homo sapiens GN=GLRX PE=1 SV=2	2	5	2	11.768	8.09	0.856	1.072	0.812	-0.22	0.1	-0.3	107	91.6	114.6	86.8	3.642	14.8034	2
Q6UXD5	Seizure 6-like protein 2 OS=Homo sapiens GN=SEZ6L2 PE=1 SV=2	2	3	2	97.498	4.89	1.089	0.919	1.233	0.12	-0.12	0.3	94.3	102.7	86.7	116.3	0.233	9.40842	2
Q9NQS3	Poliovirus receptor-related protein 3 OS=Homo sapiens GN=PVRL3 PE=1 SV=1	2	5	2	60.964	6.19	0.884	0.944	0.951	-0.18	-0.08	-0.07	105.9	93.6	99.9	100.7	0.468	12.9354	2
Q13145	BMP and activin membrane-bound inhibitor homolog OS=Homo sapiens GN=BAMBI PE=1 SV=1	2	5	2	29.088	7.75	1.22	1.016	0.878	0.29	0.02	-0.19	97.2	118.6	98.8	85.4	0.585	17.0241	2
Q15043	Zinc transporter ZIP14 OS=Homo sapiens GN=SLC39A14 PE=1 SV=3	2	6	2	54.177	5.33	0.589	0.587	0.84	-0.76	-0.77	-0.25	132.6	78.2	77.9	111.4	0.585	15.9398	2
P05783	Keratin, type I cytoskeletal 18 OS=Homo sapiens GN=KRT18 PE=1 SV=2	4	7	2	48.029	5.45	0.921	0.842	0.731	-0.12	-0.25	-0.45	114.5	105.4	96.4	83.7	0.359	21.0193	4
Q8NBS9	Thioredoxin domain-containing protein 5 OS=Homo sapiens GN=TXNDC5 PE=1 SV=2	2	3	2	47.599	5.97	0.751	0.574	0.629	-0.41	-0.8	-0.67	135.4	101.7	77.7	85.1	0.292	10.1719	2
P52803	Ephrin-A5 OS=Homo sapiens GN=EFNA5 PE=1 SV=1	2	5	2	26.28	6.42	0.907	0.805	0.734	-0.14	-0.31	-0.45	116.1	105.3	93.4	85.2	1.031	7.14898	2
P37173	TGF-beta receptor type-2 OS=Homo sapiens GN=TGFBR2 PE=1 SV=2	2	9	2	64.526	5.9	0.662	0.747	1.372	-0.6	-0.42	0.46	105.8	70	79	145.2	0.212	32.2783	2
Q9H461	Frizzled-8 OS=Homo sapiens GN=FZD8 PE=1 SV=1	2	4	2	73.252	8.19	1.128	0.983	1.063	0.17	-0.02	0.09	95.8	108.1	94.2	101.9	0.205	11.7622	2
P01781	Ig heavy chain V-III region GAL OS=Homo sapiens PE=1 SV=1	2	4	2	12.722	8.48	0.984	1.8	0.66	-0.02	0.85	-0.6	90	88.6	162	59.4	1.683	15.6737	2
O43567	E3 ubiquitin-protein ligase RNF13 OS=Homo sapiens GN=RNF13 PE=1 SV=1	2	6	2	42.787	4.98	1.061	0.919	1.085	0.08	-0.12	0.12	98.4	104.4	90.4	106.8	0.54	18.5306	2
P07333	Macrophage colony-stimulating factor 1 receptor OS=Homo sapiens GN=CSF1R PE=1 SV=2	2	3	2	107.915	6.37	0.674	0.814	1.141	-0.57	-0.3	0.19	110.2	74.3	89.8	125.8	0.17	8.77859	2
P21802	Fibroblast growth factor receptor 2 OS=Homo sapiens GN=FGFR2 PE=1 SV=1	3	6	2	91.966	5.88	1.063	0.735	1.136	0.09	-0.44	0.18	101.7	108	74.8	115.5	0.245	17.3057	3
P10645	Chromogranin-A OS=Homo sapiens GN=CHGA PE=1 SV=7	2	6	2	50.658	4.6	0.356	0.394	0.822	-1.49	-1.34	-0.28	155.5	55.4	61.3	127.8	0.28	19.6721	2
Q9UBP4	Dickkopf-related protein 3 OS=Homo sapiens GN=DKK3 PE=1 SV=2	2	5	2	38.365	4.65	1.601	1.7	1.084	0.68	0.77	0.12	74.3	118.9	126.3	80.5	0.468	14.891	2
Q92765	Secreted frizzled-related protein 3 OS=Homo sapiens GN=FRZB PE=1 SV=2	2	4	2	36.23	8.46	1.031	1.369	1.327	0.04	0.45	0.41	84.6	87.3	115.9	112.3	0.585	13.225	2
P09758	Tumor-associated calcium signal transducer 2 OS=Homo sapiens GN=TACSTD2 PE=1 SV=3	2	3	2	35.687	8.87	1.242	0.783	1.119	0.31	-0.35	0.16	96.5	119.9	75.6	108	0.438	8.94637	2
Q8TCT8	Signal peptide peptidase-like 2A OS=Homo sapiens GN=SPPL2A PE=1 SV=2	2	4	2	58.104	8.32	1.064	0.56	1.237	0.09	-0.84	0.31	103.6	110.3	58	128.1	0.389	14.6037	2
P22223	Cadherin-3 OS=Homo sapiens GN=CDH3 PE=1 SV=2	3	5	2	91.362	4.75	0.374	0.557	0.985	-1.42	-0.85	-0.02	137.2	51.3	76.4	135.2	0.212	15.4456	3
Q16832	Discoidin domain-containing receptor 2 OS=Homo sapiens GN=DDR2 PE=1 SV=2	2	5	2	96.674	5.36	0.538	0.516	1.039	-0.9	-0.96	0.06	129.3	69.5	66.7	134.4	0.199	11.7544	2
Q8TDY8	Immunoglobulin superfamily DCC subclass member 4 OS=Homo sapiens GN=IGDCC4 PE=2 SV=1	2	3	2	134.126	6.2	0.641	0.786	0.82	-0.64	-0.35	-0.29	123.2	78.9	96.9	101.1	0.131	9.28123	2
Q9UKR3	Kallikrein-13 OS=Homo sapiens GN=KLK13 PE=1 SV=1	2	3	2	30.551	8.46	0.391	0.39	0.353	-1.36	-1.36	-1.5	187.4	73.2	73.2	66.1	0.501	9.30344	2
P23083	Ig heavy chain V-I region V35 OS=Homo sapiens PE=1 SV=1	3	7	2	13	9.55	3.046	7.945	0.826	1.61	2.99	-0.28	31.2	95.1	248	25.8	2.162	18.5238	3
Q96NZ9	Proline-rich acidic protein 1 OS=Homo sapiens GN=PRAP1 PE=1 SV=2	2	3	2	17.197	5.36	0.491	0.48	0.522	-1.03	-1.06	-0.94	160.4	78.8	77	83.8	1.371	8.30545	2
P09486	SPARC OS=Homo sapiens GN=SPARC PE=1 SV=1	2	3	2	34.61	4.84	1.072	0.829	0.899	0.1	-0.27	-0.15	105.3	112.9	87.2	94.6	0.585	8.75911	2
P22304	Iduronate 2-sulfatase OS=Homo sapiens GN=IDS PE=1 SV=1	2	3	2	61.834	5.45	0.798	0.578	1.155	-0.33	-0.79	0.21	113.3	90.4	65.5	130.8	0.369	9.66872	2
Q9NY25	C-type lectin domain family 5 member A OS=Homo sapiens GN=CLEC5A PE=1 SV=1	2	4	2	21.508	8.81	1.446	0.798	0.952	0.53	-0.33	-0.07	95.3	137.8	76.1	90.8	0.778	12.3246	2
O60888	Protein CutA OS=Homo sapiens GN=CUTA PE=1 SV=2	2	5	2	19.104	5.5	0.79	0.674	0.823	-0.34	-0.57	-0.28	121.7	96.2	82	100.2	2.162	11.3629	2
Q8N126	Cell adhesion molecule 3 OS=Homo sapiens GN=CADM3 PE=1 SV=1	2	3	2	43.273	6.09	0.502	0.544	1.007	-0.99	-0.88	0.01	131	65.8	71.2	132	0.501	11.0435	2
A6NL88	Protein shisa-7 OS=Homo sapiens GN=SHISA7 PE=2 SV=3	2	2	2	56.179	10.02	1.332	0.545	0.787	0.41	-0.87	-0.35	109.2	145.4	59.5	85.9	0.15	7.84183	2
P36897	TGF-beta receptor type-1 OS=Homo sapiens GN=TGFBR1 PE=1 SV=1	2	3	2	55.923	7.55	0.591	0.536	0.987	-0.76	-0.9	-0.02	128.4	75.9	68.9	126.8	0.259	11.9832	2
O60353	Frizzled-6 OS=Homo sapiens GN=FZD6 PE=1 SV=2	2	4	2	79.24	7.96	1.164	1.733	1.486	0.22	0.79	0.57	74.3	86.5	128.8	110.4	0.199	10.1011	2
P09936	Ubiquitin carboxyl-terminal hydrolase isozyme L1 OS=Homo sapiens GN=UCHL1 PE=1 SV=2	2	2	2	24.808	5.48	0.458	0.525	0.67	-1.13	-0.93	-0.58	150.8	69	79.2	101	0.389	9.37293	2
P41271	Neuroblastoma suppressor of tumorigenicity 1 OS=Homo sapiens GN=NBL1 PE=1 SV=1	2	7	2	19.264	5.29	0.501	0.62	1.311	-1	-0.69	0.39	116.6	58.4	72.2	152.8	2.981	20.749	2
P04208	Ig lambda chain V-I region WAH OS=Homo sapiens PE=1 SV=1	2	3	2	11.718	6.54	1.491	1.736	0.981	0.58	0.8	-0.03	76.8	114.5	133.3	75.3	2.162	10.6185	2
Q9NPY3	Complement component C1q receptor OS=Homo sapiens GN=CD93 PE=1 SV=3	2	4	2	68.515	5.44	0.635	0.982	1.347	-0.66	-0.03	0.43	100.9	64.1	99.1	135.9	0.269	9.95486	2
P35442	Thrombospondin-2 OS=Homo sapiens GN=THBS2 PE=1 SV=2	2	3	2	129.908	4.83	1.309	1.023	0.886	0.39	0.03	-0.18	94.8	124.1	97	84	0.131	7.89443	2
P07225	Vitamin K-dependent protein S OS=Homo sapiens GN=PROS1 PE=1 SV=1	2	4	2	75.074	5.67	1.981	3.039	1.063	0.99	1.6	0.09	56.5	111.9	171.6	60	0.119	8.01512	2
Q9H8L6	Multimerin-2 OS=Homo sapiens GN=MMRN2 PE=1 SV=2	2	3	2	104.344	5.86	0.433	0.43	0.624	-1.21	-1.22	-0.68	160.8	69.7	69.1	100.4	0.139	8.84265	2
P40121	Macrophage-capping protein OS=Homo sapiens GN=CAPG PE=1 SV=2	2	2	2	38.474	6.19	0.876	0.713	0.812	-0.19	-0.49	-0.3	117.6	103	83.9	95.5	0.334	7.41806	2
P00558	Phosphoglycerate kinase 1 OS=Homo sapiens GN=PGK1 PE=1 SV=3	2	2	2	44.586	8.1	0.787	0.846	0.765	-0.35	-0.24	-0.39	117.7	92.6	99.6	90	0.166	7.86761	2
Q9UIB8	SLAM family member 5 OS=Homo sapiens GN=CD84 PE=1 SV=1	2	4	2	38.758	7.06	0.607	0.565	0.707	-0.72	-0.82	-0.5	138.9	84.3	78.5	98.2	0.292	12.4251	2
O00244	Copper transport protein ATOX1 OS=Homo sapiens GN=ATOX1 PE=1 SV=1	2	5	2	7.397	7.24	0.427	0.426	0.974	-1.23	-1.23	-0.04	141.5	60.4	60.3	137.8	4.623	15.9772	2
P02766	Transthyretin OS=Homo sapiens GN=TTR PE=1 SV=1	2	5	2	15.877	5.76	1.762	2.752	0.75	0.82	1.46	-0.41	63.9	112.5	175.7	47.9	1.154	18.0169	2
Q96DR8	Mucin-like protein 1 OS=Homo sapiens GN=MUCL1 PE=1 SV=1	2	9	2	9.034	4.64	1.381	0.757	1.557	0.47	-0.4	0.64	85.2	117.7	64.5	132.7	30.623	24.5414	2
P82987	ADAMTS-like protein 3 OS=Homo sapiens GN=ADAMTSL3 PE=2 SV=4	2	2	2	188.569	7.83	1.288	1.232	0.84	0.36	0.3	-0.25	91.8	118.1	113	77.1	0.048	6.27267	2
Q9NZD4	Alpha-hemoglobin-stabilizing protein OS=Homo sapiens GN=AHSP PE=1 SV=1	2	3	2	11.833	5	0.46	0.364	0.404	-1.12	-1.46	-1.31	179.6	82.7	65.3	72.5	2.162	9.65957	2
P26718	NKG2-D type II integral membrane protein OS=Homo sapiens GN=KLRK1 PE=1 SV=1	2	4	2	25.257	8.21	0.637	0.436	0.748	-0.65	-1.2	-0.42	141.9	90.3	61.8	106	0.874	11.1422	2
P01742	Ig heavy chain V-I region EU OS=Homo sapiens PE=1 SV=1	2	7	2	12.464	6.57	4.001	7.973	0.703	2	3	-0.51	29.2	117	233.2	20.6	1.683	10.5274	2
Q9BYJ0	Fibroblast growth factor-binding protein 2 OS=Homo sapiens GN=FGFBP2 PE=1 SV=1	2	3	2	24.565	8.87	1.293	1.307	0.886	0.37	0.39	-0.17	89.2	115.3	116.5	79	0.778	9.30279	2
O95633	Follistatin-related protein 3 OS=Homo sapiens GN=FSTL3 PE=1 SV=1	2	4	2	27.645	6.77	1.26	1.534	0.851	0.33	0.62	-0.23	86.1	108.5	132.1	73.3	0.778	11.4682	2
Q15746	Myosin light chain kinase, smooth muscle OS=Homo sapiens GN=MYLK PE=1 SV=4	2	4	2	210.583	6.15	0.501	0.458	0.702	-1	-1.13	-0.51	150.3	75.3	68.9	105.5	0.067	11.7681	2
Q02388	Collagen alpha-1(VII) chain OS=Homo sapiens GN=COL7A1 PE=1 SV=2	2	2	2	295.041	6.27	1.11	1.176	0.986	0.15	0.23	-0.02	93.7	103.9	110.1	92.3	0.026	9.11569	2
P07306	Asialoglycoprotein receptor 1 OS=Homo sapiens GN=ASGR1 PE=1 SV=2	2	3	2	33.165	5.5	0.747	0.914	1.33	-0.42	-0.13	0.41	100.2	74.9	91.6	133.3	0.259	10.1202	2
Q9UHI8	A disintegrin and metalloproteinase with thrombospondin motifs 1 OS=Homo sapiens GN=ADAMTS1 PE=1 SV=4	2	2	2	105.29	6.83	1.265	1.698	1.15	0.34	0.76	0.2	78.2	99	132.9	89.9	0.099	8.07459	2
Q86V85	Integral membrane protein GPR180 OS=Homo sapiens GN=GPR180 PE=2 SV=1	2	5	2	49.363	7.39	0.535	1.148	0.852	-0.9	0.2	-0.23	113.2	60.5	129.8	96.5	0.334	11.2223	2
P33151	Cadherin-5 OS=Homo sapiens GN=CDH5 PE=1 SV=5	2	2	2	87.474	5.43	0.519	1.036	0.889	-0.94	0.05	-0.17	116.1	60.3	120.3	103.2	0.141	7.28564	2
P80303	Nucleobindin-2 OS=Homo sapiens GN=NUCB2 PE=1 SV=2	2	4	2	50.164	5.12	0.614	0.53	1.565	-0.7	-0.92	0.65	107.9	66.2	57.2	168.8	0.212	13.3006	2
Q6UW32	Insulin growth factor-like family member 1 OS=Homo sapiens GN=IGFL1 PE=1 SV=1	2	2	2	12.354	7.87	0.653	0.53	0.807	-0.61	-0.92	-0.31	133.8	87.4	70.9	108	1.154	7.15452	2
Q6UXK5	Leucine-rich repeat neuronal protein 1 OS=Homo sapiens GN=LRRN1 PE=1 SV=1	2	2	2	80.665	6.15	1.162	1.125	0.956	0.22	0.17	-0.06	94.3	109.5	106	90.1	0.141	6.95139	2
P06331	Ig heavy chain V-II region ARH-77 OS=Homo sapiens PE=4 SV=1	2	4	2	16.218	8.28	0.925	1.415	0.799	-0.11	0.5	-0.32	96.7	89.4	136.8	77.2	1.512	12.9486	2
P22748	Carbonic anhydrase 4 OS=Homo sapiens GN=CA4 PE=1 SV=2	2	3	2	35.01	7.83	0.732	0.836	0.838	-0.45	-0.26	-0.25	117.4	85.9	98.2	98.4	0.585	6.03938	2
P68036	Ubiquitin-conjugating enzyme E2 L3 OS=Homo sapiens GN=UBE2L3 PE=1 SV=1	2	3	2	17.85	8.51	0.574	0.731	0.541	-0.8	-0.45	-0.89	140.6	80.6	102.8	76	0.778	9.74853	2
O00182	Galectin-9 OS=Homo sapiens GN=LGALS9 PE=1 SV=2	2	3	2	39.493	9.17	1.056	0.553	1.345	0.08	-0.86	0.43	101.2	106.8	55.9	136.1	0.311	10.7536	2
Q9UBX7	Kallikrein-11 OS=Homo sapiens GN=KLK11 PE=1 SV=2	2	2	2	31.039	8.94	1.92	1.33	1.389	0.94	0.41	0.47	70.9	136.2	94.4	98.5	0.292	7.44571	2
P15169	Carboxypeptidase N catalytic chain OS=Homo sapiens GN=CPN1 PE=1 SV=1	2	3	2	52.253	7.34	0.775	0.793	1.018	-0.37	-0.33	0.03	111.5	86.4	88.5	113.6	0.202	10.2269	2
P21810	Biglycan OS=Homo sapiens GN=BGN PE=1 SV=2	2	2	2	41.628	7.52	0.21	0.257	0.91	-2.25	-1.96	-0.14	168.3	35.4	43.2	153.1	0.259	6.78858	2
Q5D862	Filaggrin-2 OS=Homo sapiens GN=FLG2 PE=1 SV=1	2	2	2	247.928	8.31	1.581	1.491	0.957	0.66	0.58	-0.06	79.5	125.8	118.6	76.1	0.052	7.98516	2
P22532	Small proline-rich protein 2D OS=Homo sapiens GN=SPRR2D PE=2 SV=2	2	3	2	7.9	8.37	2.314	0.984	3.618	1.21	-0.02	1.86	50.5	116.9	49.7	182.8	2.162	8.26092	2
P28908	Tumor necrosis factor receptor superfamily member 8 OS=Homo sapiens GN=TNFRSF8 PE=1 SV=1	2	2	2	63.706	5.62	1.455	1.12	1.246	0.54	0.16	0.32	83	120.7	92.9	103.4	0.15	7.50849	2
P57087	Junctional adhesion molecule B OS=Homo sapiens GN=JAM2 PE=1 SV=1	2	3	2	33.186	9.09	1.353	1.311	0.958	0.44	0.39	-0.06	86.5	117.1	113.5	82.9	0.311	10.0328	2
Q92626	Peroxidasin homolog OS=Homo sapiens GN=PXDN PE=1 SV=2	2	2	2	165.17	7.17	0.862	1.293	0.956	-0.21	0.37	-0.06	97.3	83.8	125.8	93	0.056	8.02914	2
Q6ISS4	Leukocyte-associated immunoglobulin-like receptor 2 OS=Homo sapiens GN=LAIR2 PE=2 SV=1	3	6	2	16.27	5.27	1.044	0.812	1.109	0.06	-0.3	0.15	100.9	105.3	81.9	111.9	2.162	16.9305	3
P80511	Protein S100-A12 OS=Homo sapiens GN=S100A12 PE=1 SV=2	2	3	2	10.569	6.25	5.077	0.303	0.285	2.34	-1.72	-1.81	60	304.7	18.2	17.1	2.981	10.2331	2
Q6UY14	ADAMTS-like protein 4 OS=Homo sapiens GN=ADAMTSL4 PE=1 SV=2	2	3	2	116.471	8.34	0.214	0.341	0.599	-2.23	-1.55	-0.74	185.7	39.7	63.3	111.3	0.08	5.89458	2
Q93091	Ribonuclease K6 OS=Homo sapiens GN=RNASE6 PE=1 SV=2	2	4	2	17.185	8.76	1.62	1.813	0.925	0.7	0.86	-0.11	74.7	120.9	135.3	69.1	1.154	10.0804	2
Q9NZH0	G-protein coupled receptor family C group 5 member B OS=Homo sapiens GN=GPRC5B PE=2 SV=2	2	3	2	44.766	8.24	0.611	0.603	0.727	-0.71	-0.73	-0.46	136	83.1	82	98.9	0.585	5.38287	2
Q9NQ84	G-protein coupled receptor family C group 5 member C OS=Homo sapiens GN=GPRC5C PE=1 SV=2	2	3	2	48.162	8.43	0.607	0.855	0.704	-0.72	-0.23	-0.51	126.3	76.7	108	89	0.311	10.3078	2
P11226	Mannose-binding protein C OS=Homo sapiens GN=MBL2 PE=1 SV=2	2	2	2	26.127	5.49	1.739	2.742	0.827	0.8	1.46	-0.27	63.4	110.2	173.9	52.5	0.359	6.72851	2
P48551	Interferon alpha/beta receptor 2 OS=Homo sapiens GN=IFNAR2 PE=1 SV=1	2	4	2	57.722	4.5	0.421	0.71	1.118	-1.25	-0.49	0.16	123.1	51.8	87.4	137.6	0.292	13.6833	2
Q8NI32	Ly6/PLAUR domain-containing protein 6B OS=Homo sapiens GN=LYPD6B PE=2 SV=1	2	2	2	20.642	7.78	1.864	1.097	1.069	0.9	0.13	0.1	79.5	148.2	87.2	85	0.585	3.85268	2
Q92752	Tenascin-R OS=Homo sapiens GN=TNR PE=1 SV=3	2	2	2	149.467	4.82	0.619	0.402	0.68	-0.69	-1.31	-0.56	148.1	91.6	59.6	100.7	0.07	6.53629	2
Q8WUM4	Programmed cell death 6-interacting protein OS=Homo sapiens GN=PDCD6IP PE=1 SV=1	2	2	2	95.963	6.52	0.711	0.873	0.769	-0.49	-0.2	-0.38	119.3	84.8	104.1	91.8	0.087	6.76987	2
P01717	Ig lambda chain V-IV region Hil OS=Homo sapiens PE=1 SV=1	2	3	2	11.51	6.51	1.34	1.559	0.683	0.42	0.64	-0.55	87.3	117	136.1	59.7	1.512	9.56401	2
Q14112	Nidogen-2 OS=Homo sapiens GN=NID2 PE=1 SV=3	2	3	2	151.158	5.29	2.31	1.436	0.981	1.21	0.52	-0.03	69.8	161.4	100.3	68.5	0.076	9.22471	2
P12110	Collagen alpha-2(VI) chain OS=Homo sapiens GN=COL6A2 PE=1 SV=4	2	2	2	108.512	6.21	0.807	0.926	1.028	-0.31	-0.11	0.04	106.3	85.8	98.5	109.4	0.077	6.91917	2
Q96J84	Kin of IRRE-like protein 1 OS=Homo sapiens GN=KIRREL PE=1 SV=2	2	2	2	83.484	5.73	0.365	0.445	0.742	-1.45	-1.17	-0.43	156.7	57.3	69.7	116.2	0.108	6.41211	2
P01225	Follitropin subunit beta OS=Homo sapiens GN=FSHB PE=1 SV=2	2	4	2	14.69	7.06	1.801	0.806	1.319	0.85	-0.31	0.4	81.2	146.2	65.5	107.1	1.371	10.7116	2
Q08722	Leukocyte surface antigen CD47 OS=Homo sapiens GN=CD47 PE=1 SV=1	2	4	2	35.191	7.21	0.961	0.955	0.897	-0.06	-0.07	-0.16	104.9	100.8	100.2	94.1	0.359	14.0586	2
Q04771	Activin receptor type-1 OS=Homo sapiens GN=ACVR1 PE=1 SV=1	2	2	2	57.116	7.33	3.842	1.592	1.377	1.94	0.67	0.46	51.2	196.7	81.5	70.5	0.233	6.33362	2
O00115	Deoxyribonuclease-2-alpha OS=Homo sapiens GN=DNASE2 PE=1 SV=2	2	2	2	39.556	8.05	0.91	0.6	1.028	-0.14	-0.74	0.04	113.1	102.9	67.8	116.2	0.311	7.1442	2
P23284	Peptidyl-prolyl cis-trans isomerase B OS=Homo sapiens GN=PPIB PE=1 SV=2	2	2	2	23.728	9.41	0.322	0.375	0.927	-1.63	-1.41	-0.11	152.4	49.1	57.2	141.3	0.334	6.87476	2
P00748	Coagulation factor XII OS=Homo sapiens GN=F12 PE=1 SV=3	2	2	2	67.748	7.74	1.399	1.267	1.052	0.48	0.34	0.07	84.8	118.6	107.4	89.2	0.16	5.48844	2
Q07507	Dermatopontin OS=Homo sapiens GN=DPT PE=2 SV=2	2	4	2	23.989	4.82	1.532	1.763	0.892	0.62	0.82	-0.17	77.1	118.2	136	68.8	1.371	11.0558	2
Q16787	Laminin subunit alpha-3 OS=Homo sapiens GN=LAMA3 PE=1 SV=2	2	3	2	366.414	7.24	1.523	1.116	0.982	0.61	0.16	-0.03	86.6	131.8	96.6	85	0.035	5.6238	2
O14798	Tumor necrosis factor receptor superfamily member 10C OS=Homo sapiens GN=TNFRSF10C PE=1 SV=3	2	4	2	27.389	4.82	1.131	0.591	0.768	0.18	-0.76	-0.38	114.6	129.7	67.7	88	0.931	13.3109	2
Q9Y490	Talin-1 OS=Homo sapiens GN=TLN1 PE=1 SV=3	2	2	2	269.599	6.07	1.632	1.46	0.889	0.71	0.55	-0.17	80.3	131.1	117.3	71.4	0.03	6.21178	2
Q9H6B4	CXADR-like membrane protein OS=Homo sapiens GN=CLMP PE=1 SV=1	2	3	2	41.255	7.99	1.149	1.211	0.882	0.2	0.28	-0.18	94.3	108.4	114.2	83.1	0.369	5.57086	2
Q9H299	SH3 domain-binding glutamic acid-rich-like protein 3 OS=Homo sapiens GN=SH3BGRL3 PE=1 SV=1	2	2	2	10.431	4.93	0.419	0.491	0.524	-1.26	-1.03	-0.93	164.4	68.9	80.7	86.1	1.512	6.19555	2
O14594	Neurocan core protein OS=Homo sapiens GN=NCAN PE=2 SV=3	2	3	2	143.003	5.38	0.473	0.346	0.836	-1.08	-1.53	-0.26	150.6	71.3	52.2	125.9	0.099	10.2153	2
P17050	Alpha-N-acetylgalactosaminidase OS=Homo sapiens GN=NAGA PE=1 SV=2	2	2	2	46.534	5.19	0.651	0.617	1.289	-0.62	-0.7	0.37	112.4	73.3	69.4	144.9	0.233	5.56661	2
P34096	Ribonuclease 4 OS=Homo sapiens GN=RNASE4 PE=1 SV=3	2	2	2	16.829	9.03	2.173	0.669	0.671	1.12	-0.58	-0.58	88.6	192.6	59.3	59.4	0.585	4.02921	2
P17931	Galectin-3 OS=Homo sapiens GN=LGALS3 PE=1 SV=5	2	2	2	26.136	8.56	0.665	0.577	0.845	-0.59	-0.79	-0.24	129.6	86.1	74.8	109.4	0.52	6.66311	2
P01616	Ig kappa chain V-II region MIL OS=Homo sapiens PE=1 SV=1	2	2	2	12.048	9.29	1.006	1.625	1.135	0.01	0.7	0.18	83.9	84.4	136.4	95.3	1.512	6.79709	2
Q8IV08	Phospholipase D3 OS=Homo sapiens GN=PLD3 PE=1 SV=1	2	2	2	54.671	6.47	0.572	0.606	0.839	-0.81	-0.72	-0.25	132.6	75.9	80.3	111.2	0.233	5.68961	2
P25942	Tumor necrosis factor receptor superfamily member 5 OS=Homo sapiens GN=CD40 PE=1 SV=1	2	2	2	30.599	5.76	2.069	1.064	1.211	1.05	0.09	0.28	74.8	154.9	79.6	90.7	0.389	6.1258	2
P80108	Phosphatidylinositol-glycan-specific phospholipase D OS=Homo sapiens GN=GPLD1 PE=1 SV=3	2	2	2	92.278	6.37	0.87	1.154	0.76	-0.2	0.21	-0.4	105.7	92	121.9	80.3	0.116	4.86931	2
Q9Y561	Low-density lipoprotein receptor-related protein 12 OS=Homo sapiens GN=LRP12 PE=1 SV=1	2	2	2	94.923	5.24	1.11	1.285	1.032	0.15	0.36	0.05	90.3	100.3	116.1	93.2	0.094	5.54084	2
Q68D85	Natural cytotoxicity triggering receptor 3 ligand 1 OS=Homo sapiens GN=NCR3LG1 PE=1 SV=1	2	2	2	50.795	5.59	0.39	0.707	0.934	-1.36	-0.5	-0.1	132	51.5	93.3	123.3	0.194	5.92041	2
P10721	Mast/stem cell growth factor receptor Kit OS=Homo sapiens GN=KIT PE=1 SV=1	2	2	2	109.794	6.98	0.743	0.975	0.775	-0.43	-0.04	-0.37	114.5	85	111.7	88.7	0.077	5.71063	2
Q5JWF2	Guanine nucleotide-binding protein G(s) subunit alpha isoforms XLas OS=Homo sapiens GN=GNAS PE=1 SV=2	2	2	2	110.956	5.03	0.901	1.046	0.836	-0.15	0.07	-0.26	105.7	95.2	110.6	88.4	0.133	6.91253	2
P36955	Pigment epithelium-derived factor OS=Homo sapiens GN=SERPINF1 PE=1 SV=4	2	2	2	46.283	6.38	1.292	1.416	0.919	0.37	0.5	-0.12	86.5	111.7	122.4	79.4	0.212	5.91339	2
P14618	Pyruvate kinase isozymes M1/M2 OS=Homo sapiens GN=PKM PE=1 SV=4	2	2	2	57.9	7.84	0.716	0.705	0.831	-0.48	-0.5	-0.27	123	88	86.7	102.2	0.133	4.94631	2
O15197	Ephrin type-B receptor 6 OS=Homo sapiens GN=EPHB6 PE=1 SV=4	2	2	2	110.63	6.65	0.897	0.863	0.958	-0.16	-0.21	-0.06	107.6	96.5	92.8	103	0.101	6.01746	2
P03950	Angiogenin OS=Homo sapiens GN=ANG PE=1 SV=1	2	3	2	16.539	9.64	0.712	0.56	0.542	-0.49	-0.84	-0.88	142.1	101.2	79.6	77.1	0.52	5.96617	2
O14786	Neuropilin-1 OS=Homo sapiens GN=NRP1 PE=1 SV=3	2	2	2	103.069	5.88	0.823	0.782	0.954	-0.28	-0.35	-0.07	112.4	92.5	87.9	107.2	0.11	5.59274	2
Q6UX15	Layilin OS=Homo sapiens GN=LAYN PE=2 SV=1	2	2	2	43.081	4.94	0.754	0.818	1.27	-0.41	-0.29	0.35	104.1	78.5	85.2	132.2	0.292	6.48236	2
Q14314	Fibroleukin OS=Homo sapiens GN=FGL2 PE=1 SV=1	2	3	2	50.197	7.39	1.207	1.461	0.869	0.27	0.55	-0.2	88.1	106.4	128.8	76.6	0.16	8.10876	2
Q9NQ79	Cartilage acidic protein 1 OS=Homo sapiens GN=CRTAC1 PE=1 SV=2	2	2	2	71.376	5.12	1.039	0.981	1.136	0.06	-0.03	0.18	96.3	100	94.4	109.3	0.15	5.61389	2
Q14393	Growth arrest-specific protein 6 OS=Homo sapiens GN=GAS6 PE=1 SV=2	2	2	2	79.625	6.21	0.763	0.786	1.288	-0.39	-0.35	0.37	104.3	79.5	81.9	134.3	0.103	5.23414	2
P08311	Cathepsin G OS=Homo sapiens GN=CTSG PE=1 SV=2	2	2	2	28.819	11.19	1.371	0.655	0.581	0.45	-0.61	-0.78	110.9	152	72.6	64.4	0.334	6.67382	2
Q9NR99	Matrix-remodeling-associated protein 5 OS=Homo sapiens GN=MXRA5 PE=2 SV=3	2	2	2	311.955	8.32	0.378	0.383	0.499	-1.4	-1.38	-1	177	66.9	67.8	88.4	0.029	6.87731	2
O75071	EF-hand domain-containing protein KIAA0494 OS=Homo sapiens GN=KIAA0494 PE=1 SV=1	2	3	2	54.997	6.32	0.311	0.386	0.844	-1.68	-1.37	-0.24	157.4	49	60.8	132.8	0.166	7.70632	2
Q8IWT1	Sodium channel subunit beta-4 OS=Homo sapiens GN=SCN4B PE=1 SV=1	2	4	2	24.953	7.36	2.384	2.043	2.018	1.25	1.03	1.01	53.7	128.1	109.8	108.4	0.389	12.0654	2
Q13291	Signaling lymphocytic activation molecule OS=Homo sapiens GN=SLAMF1 PE=1 SV=1	2	2	2	37.207	8.46	0.914	0.837	1.056	-0.13	-0.26	0.08	105.1	96.1	87.9	110.9	0.311	5.3367	2
P14778	Interleukin-1 receptor type 1 OS=Homo sapiens GN=IL1R1 PE=1 SV=1	2	2	2	65.361	7.83	0.832	0.566	0.656	-0.27	-0.82	-0.61	131	108.9	74.2	85.9	0.141	6.1769	2
Q13591	Semaphorin-5A OS=Homo sapiens GN=SEMA5A PE=1 SV=3	2	2	2	120.537	7.21	1.272	0.755	0.806	0.35	-0.41	-0.31	104.4	132.8	78.8	84.1	0.093	6.35634	2
P63208	S-phase kinase-associated protein 1 OS=Homo sapiens GN=SKP1 PE=1 SV=2	2	2	2	18.646	4.54	0.576	0.672	0.843	-0.8	-0.57	-0.25	129.4	74.5	86.9	109.1	0.468	5.38067	2
O43852	Calumenin OS=Homo sapiens GN=CALU PE=1 SV=2	2	2	2	37.084	4.64	0.448	0.415	0.693	-1.16	-1.27	-0.53	156.6	70.1	64.9	108.4	0.311	4.8396	2
P61970	Nuclear transport factor 2 OS=Homo sapiens GN=NUTF2 PE=1 SV=1	2	2	2	14.469	5.38	0.547	0.541	0.863	-0.87	-0.89	-0.21	135.5	74.2	73.4	117	0.778	5.42192	2
P60709	Actin, cytoplasmic 1 OS=Homo sapiens GN=ACTB PE=1 SV=1	2	5	2	41.71	5.48	0.587	0.593	0.675	-0.77	-0.75	-0.57	140.1	82.2	83.1	94.6	0.222	14.3142	2
Q5FWE3	Proline-rich transmembrane protein 3 OS=Homo sapiens GN=PRRT3 PE=1 SV=3	2	2	2	102.134	7.78	1.148	0.731	0.774	0.2	-0.45	-0.37	109.5	125.7	80.1	84.7	0.122	5.4731	2
Q9UGT4	Sushi domain-containing protein 2 OS=Homo sapiens GN=SUSD2 PE=1 SV=1	2	3	2	90.15	6.28	0.603	0.543	0.585	-0.73	-0.88	-0.77	146.5	88.3	79.6	85.6	0.125	9.05306	2
Q99538	Legumain OS=Homo sapiens GN=LGMN PE=1 SV=1	2	2	2	49.379	6.55	1.311	0.995	0.904	0.39	-0.01	-0.15	95	124.6	94.5	85.9	0.212	5.98948	2
P15090	Fatty acid-binding protein, adipocyte OS=Homo sapiens GN=FABP4 PE=1 SV=3	2	2	2	14.709	7.14	0.85	2.74	0.825	-0.24	1.45	-0.28	73.9	62.8	202.4	60.9	0.668	5.17275	2
Q03154	Aminoacylase-1 OS=Homo sapiens GN=ACY1 PE=1 SV=1	2	2	2	45.856	6.18	0.933	0.758	1.024	-0.1	-0.4	0.03	107.7	100.5	81.6	110.2	0.194	2.94052	2
O60235	Transmembrane protease serine 11D OS=Homo sapiens GN=TMPRSS11D PE=1 SV=1	2	2	2	46.234	8.38	0.643	1.032	0.867	-0.64	0.05	-0.21	112.9	72.6	116.6	97.9	0.245	3.62858	2
P04733	Metallothionein-1F OS=Homo sapiens GN=MT1F PE=1 SV=1	2	2	2	6.081	7.83	3.072	1.102	1.294	1.62	0.14	0.37	61.8	190	68.2	80	3.642	5.34829	2
O60437	Periplakin OS=Homo sapiens GN=PPL PE=1 SV=4	2	2	2	204.623	5.6	1.099	0.683	1.014	0.14	-0.55	0.02	105.4	115.8	72	106.8	0.035	4.49037	2
Q9H9P2	Chondrolectin OS=Homo sapiens GN=CHODL PE=2 SV=2	2	3	2	30.411	6.83	0.437	0.523	0.942	-1.19	-0.94	-0.09	137.8	60.3	72.1	129.8	0.425	7.45139	2
P01019	Angiotensinogen OS=Homo sapiens GN=AGT PE=1 SV=1	2	2	2	53.121	6.32	0.611	1.152	0.688	-0.71	0.2	-0.54	115.9	70.9	133.5	79.7	0.233	5.26895	2
A6NGN9	IgLON family member 5 OS=Homo sapiens GN=IGLON5 PE=2 SV=4	2	2	2	36.772	7.34	0.514	0.443	0.691	-0.96	-1.18	-0.53	151.1	77.6	66.9	104.4	0.292	6.25795	2
P07476	Involucrin OS=Homo sapiens GN=IVL PE=1 SV=2	2	2	2	68.437	4.61	0.848	0.923	1.354	-0.24	-0.12	0.44	97	82.2	89.5	131.3	0.129	4.7777	2
O43240	Kallikrein-10 OS=Homo sapiens GN=KLK10 PE=1 SV=3	2	2	2	30.15	8.59	0.992	0.611	0.875	-0.01	-0.71	-0.19	115	114.1	70.3	100.6	0.359	5.76626	2
P00736	Complement C1r subcomponent OS=Homo sapiens GN=C1R PE=1 SV=2	2	2	2	80.067	6.21	0.623	0.944	0.741	-0.68	-0.08	-0.43	120.9	75.4	114.1	89.6	0.122	4.69787	2
Q5JXA9	Signal-regulatory protein beta-2 OS=Homo sapiens GN=SIRPB2 PE=2 SV=1	2	2	2	36.944	5.66	0.363	0.424	0.675	-1.46	-1.24	-0.57	162.5	59	68.9	109.7	0.292	4.19993	2
Q7Z5N4	Protein sidekick-1 OS=Homo sapiens GN=SDK1 PE=1 SV=3	2	2	2	241.962	6.39	0.575	0.523	1.004	-0.8	-0.93	0.01	128.9	74.2	67.5	129.4	0.049	4.67441	2
Q6UWL2	Sushi domain-containing protein 1 OS=Homo sapiens GN=SUSD1 PE=1 SV=1	2	2	2	82.656	6.43	1.085	0.795	0.728	0.12	-0.33	-0.46	110.9	120.3	88.1	80.7	0.122	4.38288	2
P30101	Protein disulfide-isomerase A3 OS=Homo sapiens GN=PDIA3 PE=1 SV=4	2	2	2	56.747	6.35	0.603	0.574	0.768	-0.73	-0.8	-0.38	135.8	81.9	78	104.3	0.15	5.18955	2
P49788	Retinoic acid receptor responder protein 1 OS=Homo sapiens GN=RARRES1 PE=2 SV=2	2	2	2	33.264	8.51	0.722	0.647	1.19	-0.47	-0.63	0.25	112.4	81.1	72.7	133.8	0.334	5.86629	2
Q9ULK6	RING finger protein 150 OS=Homo sapiens GN=RNF150 PE=2 SV=2	2	2	2	48.041	5.27	0.25	0.178	0.385	-2	-2.49	-1.38	220.5	55.1	39.3	85	0.334	5.83143	2
Q9H6Y7	E3 ubiquitin-protein ligase RNF167 OS=Homo sapiens GN=RNF167 PE=1 SV=1	2	3	2	38.274	5.63	1.18	1.281	1.296	0.24	0.36	0.37	84.1	99.3	107.7	108.9	0.359	8.79108	2
Q9UNZ2	NSFL1 cofactor p47 OS=Homo sapiens GN=NSFL1C PE=1 SV=2	2	2	2	40.548	5.1	1.457	0.6	0.772	0.54	-0.74	-0.37	104.5	152.2	62.7	80.6	0.212	5.61696	2
P20908	Collagen alpha-1(V) chain OS=Homo sapiens GN=COL5A1 PE=1 SV=3	2	3	2	183.447	5.06	0.724	0.68	0.817	-0.47	-0.56	-0.29	124.2	90	84.4	101.5	0.047	7.31028	2
P05997	Collagen alpha-2(V) chain OS=Homo sapiens GN=COL5A2 PE=1 SV=3	2	2	2	144.821	6.46	0.924	0.894	0.587	-0.11	-0.16	-0.77	117.5	108.5	105	68.9	0.053	5.7527	2
P08887	Interleukin-6 receptor subunit alpha OS=Homo sapiens GN=IL6R PE=1 SV=1	2	3	2	51.515	8.22	0.931	1.216	0.76	-0.1	0.28	-0.4	102.4	95.3	124.5	77.9	0.233	6.06166	2
P12104	Fatty acid-binding protein, intestinal OS=Homo sapiens GN=FABP2 PE=1 SV=2	2	2	2	15.198	7.24	1.297	2.536	1.447	0.37	1.34	0.53	63.7	82.6	161.5	92.2	0.585	5.71343	2
Q9UBG0	C-type mannose receptor 2 OS=Homo sapiens GN=MRC2 PE=1 SV=2	2	3	2	166.568	5.83	0.977	1.027	0.894	-0.03	0.04	-0.16	102.6	100.3	105.4	91.8	0.072	7.39247	2
Q8IX05	CD302 antigen OS=Homo sapiens GN=CD302 PE=1 SV=1	2	2	2	26.166	4.61	0.805	1.027	1.179	-0.31	0.04	0.24	99.7	80.3	102.4	117.6	0.585	5.5422	2
P05981	Serine protease hepsin OS=Homo sapiens GN=HPN PE=1 SV=1	2	2	2	44.982	7.62	0.551	0.473	0.838	-0.86	-1.08	-0.26	139.8	77.1	66.1	117.1	0.222	5.90956	2
Q9UN70	Protocadherin gamma-C3 OS=Homo sapiens GN=PCDHGC3 PE=1 SV=1	2	2	2	101.016	5.21	0.703	0.785	0.638	-0.51	-0.35	-0.65	127.9	90	100.5	81.6	0.11	5.63756	2
P62937	Peptidyl-prolyl cis-trans isomerase A OS=Homo sapiens GN=PPIA PE=1 SV=2	2	2	2	18.001	7.81	0.238	0.351	0.343	-2.07	-1.51	-1.54	207	49.2	72.7	71.1	0.389	5.63828	2
P08962	CD63 antigen OS=Homo sapiens GN=CD63 PE=1 SV=2	2	2	2	25.619	7.81	1.756	1.57	0.971	0.81	0.65	-0.04	75.5	132.6	118.5	73.3	0.425	4.91886	2
P08246	Neutrophil elastase OS=Homo sapiens GN=ELANE PE=1 SV=1	2	2	2	28.5	9.35	3.793	0.55	0.519	1.92	-0.86	-0.95	68.2	258.8	37.5	35.4	0.425	6.25664	2
O43505	N-acetyllactosaminide beta-1,3-N-acetylglucosaminyltransferase OS=Homo sapiens GN=B3GNT1 PE=1 SV=1	2	2	2	47.089	7.2	0.824	0.74	1.184	-0.28	-0.43	0.24	106.7	87.9	79	126.3	0.122	4.77464	2
P09211	Glutathione S-transferase P OS=Homo sapiens GN=GSTP1 PE=1 SV=2	2	2	2	23.341	5.64	0.64	0.611	0.585	-0.64	-0.71	-0.77	141	90.2	86.2	82.6	0.468	5.70776	2
P04406	Glyceraldehyde-3-phosphate dehydrogenase OS=Homo sapiens GN=GAPDH PE=1 SV=3	2	3	2	36.03	8.46	0.662	0.78	0.627	-0.59	-0.36	-0.67	130.3	86.3	101.7	81.7	0.245	7.44195	2
O15393	Transmembrane protease serine 2 OS=Homo sapiens GN=TMPRSS2 PE=1 SV=3	2	2	2	53.824	7.81	1.068	0.597	1.019	0.09	-0.74	0.03	108.6	116	64.8	110.6	0.259	2.97975	2
Q9UQV4	Lysosome-associated membrane glycoprotein 3 OS=Homo sapiens GN=LAMP3 PE=1 SV=3	2	2	2	44.318	8.41	4.226	1.643	1.161	2.08	0.72	0.21	49.8	210.5	81.8	57.8	0.292	6.74272	2
Q9UHL4	Dipeptidyl peptidase 2 OS=Homo sapiens GN=DPP7 PE=1 SV=3	2	2	2	54.307	6.32	0.657	0.641	1.111	-0.61	-0.64	0.15	117.4	77.1	75.2	130.4	0.186	4.71704	2
P21695	Glycerol-3-phosphate dehydrogenase [NAD(+)], cytoplasmic OS=Homo sapiens GN=GPD1 PE=1 SV=4	2	2	2	37.543	6.18	0.741	0.796	0.911	-0.43	-0.33	-0.13	116	85.9	92.3	105.7	0.202	4.98732	2
P08195	4F2 cell-surface antigen heavy chain OS=Homo sapiens GN=SLC3A2 PE=1 SV=3	2	2	2	67.952	5.01	0.726	0.829	0.797	-0.46	-0.27	-0.33	119.3	86.6	98.9	95.1	0.15	4.94673	2
Q96PC5	Melanoma inhibitory activity protein 2 OS=Homo sapiens GN=MIA2 PE=2 SV=3	2	2	2	61.733	4.35	0.602	0.589	1.198	-0.73	-0.76	0.26	118	71	69.5	141.4	0.172	5.23991	2
P59665	Neutrophil defensin 1 OS=Homo sapiens GN=DEFA1 PE=1 SV=1	2	7	2	10.194	6.99	1.278	0.906	0.676	0.35	-0.14	-0.57	103.6	132.5	93.9	70	1.154	12.3009	2
A1L4H1	Soluble scavenger receptor cysteine-rich domain-containing protein SSC5D OS=Homo sapiens GN=SSC5D PE=2 SV=3	2	2	2	165.639	6.13	1.869	1.043	0.817	0.9	0.06	-0.29	84.6	158.1	88.2	69.1	0.068	4.76433	2
Q8NCC3	Group XV phospholipase A2 OS=Homo sapiens GN=PLA2G15 PE=1 SV=2	2	2	2	46.628	6.73	0.507	0.63	0.92	-0.98	-0.67	-0.12	130.9	66.3	82.5	120.3	0.222	4.21247	2
P51161	Gastrotropin OS=Homo sapiens GN=FABP6 PE=1 SV=2	2	2	2	14.362	6.8	1.178	1.817	1.214	0.24	0.86	0.28	76.8	90.4	139.6	93.2	0.668	4.34093	2
Q08188	Protein-glutamine gamma-glutamyltransferase E OS=Homo sapiens GN=TGM3 PE=1 SV=4	2	2	2	76.584	5.86	1.026	0.919	0.643	0.04	-0.12	-0.64	111.5	114.4	102.5	71.7	0.11	4.68786	2
