# Supplementary material for: Urinary complement proteins in IgA nephropathy progression from a relative quantitative proteomic analysis
Source: PeerJ. 2023 Apr 11;11:e15125. doi: 10.7717/peerj.15125 (PMC10103701; doi:10.7717/peerj.15125)
Supplement: Supplemental Information 8 [file peerj-11-15125-s008.xlsx]

## Sheet: Sheet1
Group	Disease	Sex (M/F)	Age (year)	24 hUTP (g)	SCr (μmol/L)	eGFR (ml/min/1.73 m2)	C3 (g/L)	C4 (g/L)
Discovery phase
1	IgAN1	F	24	2.13	58	131.6	1.028	0.21
1	IgAN1	F	35	0.29	56	127.09	0.859	0.196
1	IgAN1	M	29	1.31	80	114.28	0.969	0.201
1	IgAN1	F	43	1.5	61	108.34	1.06	0.189
1	IgAN1	M	31	2.18	83	107.78	0.954	0.193
1	IgAN1	M	43	0.67	78.8	106.79	1.044	0.173
1	IgAN1	M	33	2.38	85	103.26	1.421	0.303
1	IgAN1	M	28	0.39	91	98.48	1.05	0.21
2	IgAN2	M	31	1.68	99	87.09	0.944	0.24
2	IgAN2	F	23	0.84	86	82.31	0.814	0.152
2	IgAN2	M	40	4.04	102	78.86	0.974	0.218
2	IgAN2	M	47	1.38	117	63.6	0.965	0.296
2	IgAN2	M	55	2.5	114	62.04	1.024	0.293
3	IgAN3	F	57	0.32	92	59.75	1.146	0.137
3	IgAN3	M	30	2.17	145	55.29	1.054	0.203
3	IgAN3	F	45	2	109	52.96	1.196	0.392
3	IgAN3	M	35	1.61	157	48.49	1.043	0.268
3	IgAN3	M	21	2.75	171	48.25	1.026	0.203
3	IgAN3	M	35	1.99	172	43.42	0.702	0.158
3	IgAN3	M	26	2.48	188	41.54	1.136	0.339
3	IgAN3	M	42	1.36	180	39.13	0.67	0.14
3	IgAN3	M	52	1.31	302	19.51	1.823	0.277
4	pMN	F	20	2.55	53	150.93	1.031	0.165
4	pMN	M	31	3.6	71	130.17	1.529	0.344
4	pMN	F	52	2.87	54	117.85	0.991	0.229
4	pMN	F	48	1.99	56	116	1.327	0.192
4	pMN	M	45	4.4	73	114.08	1.267	0.353
4	pMN	F	46	2.36	58	112.75	1.17	0.3
4	pMN	M	31	1.64	81	111	0.863	0.141
4	pMN	M	51	3.48	103	72.14	1.285	0.36
WB Validation
5	IgAN1	F	26	1.65	60	124.55	1.435	0.241
5	IgAN1	F	24	0.84	58	131.6	1.028	0.21
5	IgAN1	F	35	0.29	56	127.09	0.859	0.196
5	IgAN1	F	43	1.25	61	108.34	1.06	0.189
5	IgAN1	F	51	1.72	54	118.69	0.882	0.206
5	IgAN2	M	31	0.58	99	87.09	0.986	0.258
6	IgAN2	M	35	2.05	130	60.92	1.063	0.171
6	IgAN2	M	41	1.49	105	75.61	1.378	0.301
6	IgAN2	M	40	2.92	102	78.86	0.974	0.218
6	IgAN2	F	23	0.28	86	82.31	0.814	0.152
6	IgAN2	F	35	0.46	88	73.59	1.016	0.288
6	IgAN2	M	34	2.63	124	64.95	1.002	0.155
6	IgAN2	M	47	1.12	117	63.6	0.965	0.296
6	IgAN2	M	47	0.62	107	70.85	1.368	0.309
7	IgAN2	M	42	1.99	180	39.13	1.823	0.277
7	IgAN3	M	35	1.55	172	43.42	0.702	0.158
7	IgAN3	M	35	1.53	157	48.49	1.043	0.268
8	pMN	F	58	2.34	110	47.8	1.126	0.306
8	pMN	F	42	2.92	57	118.43	0.979	0.115
8	pMN	M	54	0.94	78	98.85	1.409	0.319
8	pMN	M	51	2.73	61	135.9	1.173	0.251
8	pMN	F	42	0.67	70	92.38	1.433	0.424
PRM Validation
9	IgAN1	M	14	1.04	61	176.23	1.334	0.15
9	IgAN1	M	30	2.46	69	135.7	1.126	0.098
9	IgAN1	F	26	1.9	59	127.11	0.851	0.228
9	IgAN1	M	33	0.97	80	111.1	0.86	0.17
9	IgAN1	F	33	1.77	65	107.6	1.454	0.201
9	IgAN1	M	38	0.83	81	105.7	1.213	0.209
9	IgAN1	F	31	1.98	67	105.2	1.076	0.212
9	IgAN1	F	25	0.77	70	104.1	1.166	0.212
9	IgAN1	M	23	1.52	90	103.4	1.029	0.327
9	IgAN1	M	35	0.64	85	101.8	1.085	0.206
9	IgAN1	F	59	1.68	62	94.9	0.931	0.114
9	IgAN1	M	46	2.81	85	94.3	1.389	0.441
9	IgAN1	M	53	1.68	83	92.3	1.119	0.189
9	IgAN1	F	52	0.63	67	90.8	1.095	0.158
10	IgAN2	F	34	0.62	75	89.9	1.051	0.211
10	IgAN2	M	33	1.37	97	88	1.325	0.244
10	IgAN2	F	48	1.09	71	87.1	1.268	0.258
10	IgAN2	M	31	1.47	103	83.02	1.214	0.198
10	IgAN2	F	48	2.58	76	80.19	1.242	0.301
10	IgAN2	F	33	0.92	83	80.1	1.477	0.227
10	IgAN2	M	14	3.89	118	79.4	1.123	0.202
10	IgAN2	F	41	1.12	81	78	0.892	0.19
10	IgAN2	F	36	1.34	86	75.13	0.979	0.151
10	IgAN2	M	32	0.66	113	73.7	1.252	0.275
10	IgAN2	F	40	2.21	86	73.05	1.127	0.219
10	IgAN2	M	54	1.37	101	72.3	0.99	0.213
10	IgAN2	M	44	1.5	108	71.6	0.931	0.172
10	IgAN2	F	38	1.45	89	71.1	0.945	0.201
10	IgAN2	F	30	3.23	94	70.37	1.421	0.406
10	IgAN2	M	23	4.38	123	70.17	0.898	0.216
10	IgAN2	F	45	1.38	87	69.6	1.213	0.218
10	IgAN2	M	31	1.68	120	69.02	1.036	0.265
10	IgAN2	F	51	0.74	86	67.6	1.005	0.17
10	IgAN2	M	52	0.76	108	67.6	1.008	0.152
10	IgAN2	M	24	1.79	131	65.2	1.448	0.359
10	IgAN2	M	45	1.01	117	64.5	1.203	0.354
10	IgAN2	M	27	2.08	131	63.84	0.946	0.177
10	IgAN2	M	69	0.75	103	63.6	1.13	0.197
10	IgAN2	M	36	1.31	126	62.8	1.057	0.237
10	IgAN2	M	33	3.32	129	62.36	1.105	0.24
10	IgAN2	F	52	4.1	93	61.08	1.143	0.245
10	IgAN2	M	39	3.61	127	60.92	1.305	0.239
10	IgAN2	M	55	2.15	117	60.12	1.129	0.255
11	IgAN3	F	44	0.7	100	59.2	1.078	0.266
11	IgAN3	M	44	1.47	139	58.6	1.068	0.219
11	IgAN3	M	22	4.62	149	56.59	1.114	0.237
11	IgAN3	M	44	2.91	132	56.14	1.3	0.297
11	IgAN3	M	48	3.5	129	56.12	1.181	0.387
11	IgAN3	M	35	2.72	140	55.7	1.043	0.176
11	IgAN3	F	46	1.01	105	55	1.218	0.219
11	IgAN3	M	71	1.98	115	54.86	1.217	0.293
11	IgAN3	M	70	2.61	118	53.56	1.176	0.176
11	IgAN3	F	29	1.57	119	53.3	0.842	0.221
11	IgAN3	M	39	1.05	144	52.34	1.292	0.358
11	IgAN3	F	29	1.19	123	51.2	1.012	0.197
11	IgAN3	M	62	4.44	129	50.86	1.123	0.213
11	IgAN3	M	60	1.32	131	50.63	1.392	0.301
11	IgAN3	F	33	0.45	122	50.28	1.066	0.156
11	IgAN3	F	44	1.97	118	48.5	0.882	0.179
11	IgAN3	M	41	1.04	156	46.9	0.962	0.167
11	IgAN3	F	63	2.82	109	46.67	0.943	0.213
11	IgAN3	F	46	1.98	122	45.9	1.248	0.271
11	IgAN3	F	40	2.44	127	45.6	1.234	0.2
11	IgAN3	M	38	2.9	167	44.06	1.096	0.243
