# Supplementary material for: Urinary complement proteins in IgA nephropathy progression from a relative quantitative proteomic analysis
Source: PeerJ. 2023 Apr 11;11:e15125. doi: 10.7717/peerj.15125 (PMC10103701; doi:10.7717/peerj.15125)
Supplement: Supplemental Information 9 [file peerj-11-15125-s009.xlsx]

## Sheet: Sheet1
IgAN-1	IgAN-2	IgAN-3	pMN	NAGLU
78907.8	19457.1	45786.8	41381.6
71681.8	50633.7	37149.2	105249
63487.5	48960.6	34519.9	108858
43267.2	54861.8		66583.2
54897.3	69695.3		59028.4
54662.1	53012.3
	50284.7
	45085.5

## Sheet: Sheet2
IgAN-1	IgAN-2	IgAN-3	pMN	GLA
78884	5652	11130	16024
48791	6145	13051	53090
52929	9285	10248	39945
11765	26198		41173
13681	36750		24969
21576	18356
	33215
	9099
